## Running Title: Sheep gastric and intestinal organoids

# 1 The development of ovine gastric and intestinal organoids for studying ruminant host- 2 pathogen interactions

3  
4 David Smith<sup>1\*,\*\*</sup>; Daniel R. G. Price<sup>1\*</sup>; Alison Burrells<sup>1</sup>; Marc N. Faber<sup>1</sup>; Katie A.  
5 Hildersley<sup>1,2</sup>; Cosmin Chintoan-Uta<sup>3</sup>; Ambre F. Chapuis<sup>1, 3</sup>; Mark Stevens<sup>3</sup>, Karen  
6 Stevenson<sup>1</sup>; Stewart T. G. Burgess<sup>1</sup>; Elisabeth A. Innes<sup>1</sup>; Alasdair J. Nisbet<sup>1</sup>; Tom N.  
7 McNeilly<sup>1</sup>

8  
9 \*co-first authors

10 <sup>1</sup>Moredun Research Institute, Pentlands Science Park, Midlothian, United Kingdom EH26 0PZ

11 <sup>2</sup>Institute of Biodiversity, Animal Health and Comparative Medicine, University of Glasgow,  
12 United Kingdom G61 1QH

13 <sup>3</sup>The Roslin Institute, University of Edinburgh, Midlothian, United Kingdom EH25 9RG

14 \*\*Correspondence: [d.smith@moredun.ac.uk](mailto:d.smith@moredun.ac.uk)

15  
16 **Keywords:** mini-guts, three-dimensional (3D) organoids, host-pathogen interactions, *in vitro*  
17 culture systems, stem cells, crypts, sheep, gastrointestinal

## 18 19 Abstract

20 Gastrointestinal (GI) infections in sheep have significant implications for animal health,  
21 welfare and productivity, as well as being a source of zoonotic pathogens. Interactions between  
22 pathogens and epithelial cells at the mucosal surface play a key role in determining the outcome  
23 of GI infections; however, the inaccessibility of the GI tract *in vivo* significantly limits the  
24 ability to study such interactions in detail. We therefore developed ovine epithelial organoids  
25 representing physiologically important gastric and intestinal sites of infection, specifically the  
26 abomasum (analogous to the stomach in monogastrics) and ileum. We show that both abomasal  
27 and ileal organoids form self-organising three-dimensional structures with a single epithelial  
28 layer and a central lumen that are stable in culture over serial passage. We performed RNA-  
29 seq analysis on abomasal and ileal tissue from multiple animals and on organoids across  
30 multiple passages and show the transcript profile of both abomasal and ileal organoids cultured  
31 under identical conditions are reflective of the tissue from which they were derived and that  
32 the transcript profile in organoids is stable over at least five serial passages. In addition, we  
33 demonstrate that the organoids can be successfully cryopreserved and resuscitated, allowing  
34 long-term storage of organoid lines, thereby reducing the number of animals required as a  
35 source of tissue. We also report the first published observations of a helminth infecting gastric  
36 and intestinal organoids by challenge with the sheep parasitic nematode *Teladorsagia*  
37 *circumcincta*, demonstrating the utility of these organoids for pathogen co-culture experiments.  
38 Finally, the polarity in the abomasal and ileal organoids can be inverted to make the apical  
39 surface directly accessible to pathogens or their products, here shown by infection of apical-  
40 out organoids with the zoonotic enteric bacterial pathogen *Salmonella enterica* serovar  
41 Typhimurium. In summary, we report a simple and reliable *in vitro* culture system for  
42 generation and maintenance of small ruminant intestinal and gastric organoids. In line with 3Rs  
43 principals, use of such organoids will reduce and replace animals in host-pathogen research.

## 44 45 1. Introduction

46 The mammalian gastrointestinal (GI) tract is the site of digestion and nutrient absorption, as  
47 well as a predilection site for many infectious pathogens, including bacteria, viruses and  
48 parasites. Understanding how pathogens attach and invade cells in the GI tract will help

## Running Title: Sheep gastric and intestinal organoids

49 determine mechanisms of host infection, disease pathogenesis and enable strategies to prevent  
50 and control infectious disease. Both the gastric stomach and intestine share a number of  
51 common features, including a single luminal layer of epithelial cells sealed by tight junctions  
52 which is renewed approximately every 3 – 5 days. In both organs, this huge regenerative  
53 capacity is mediated by proliferation and differentiation of tissue resident adult stem cells  
54 (ASCs) (Barker et al., 2007, 2010; Sato et al., 2009; Xiao and Zhou, 2020). In intestinal tissues,  
55 pockets of leucine-rich repeat-containing G protein-coupled receptor 5 (LGR5)-expressing  
56 ASCs reside in the base of the crypts of Lieberkühn and can differentiate into all five epithelial  
57 cell types of the intestine: enterocytes, goblet cells, enteroendocrine cells, tuft cells, and Paneth  
58 cells (Barker et al., 2007; Sato et al., 2009). In the stomach the epithelia is arranged into  
59 multiple gastric units, which comprise of the gastric pit, isthmus, neck and base with  
60 proliferative stem cells located in the isthmus (Barker et al., 2010; Xiao and Zhou, 2020). The  
61 ASCs of the gastric gland can differentiate into all five epithelial cell types of the gastric  
62 stomach: surface neck mucus cells, parietal cells, chief cells, enteroendocrine cells (including  
63 G cells, D cells, and enterochromaffin-like cells) and tuft cells (Barker et al., 2010; Xiao and  
64 Zhou, 2020).

65 The huge regenerative capacity of GI tract and the ability of ASCs to differentiate into  
66 epithelial cell types present in the GI tract has been exploited to develop GI organoids or “mini-  
67 guts” that reflect the cellular diversity and physiology of the organ from which they were  
68 derived (Sato et al., 2009; Barker et al., 2010). Organoid models of the GI tract were first  
69 developed from mouse stomach and intestine tissues. To achieve this, researchers isolated  
70 mouse LGR5<sup>+</sup> adult stem cells from these organs and cultured them in a laminin rich  
71 extracellular matrix extracted from the Engelbreth-Holm-Swarm (EHS) mouse sarcoma, with  
72 appropriate growth factors (including Wnt3a, epidermal growth factor, Noggin and R-spondin  
73 1). The resulting organoids consisted of organ-specific tissue (gastric or intestinal epithelia)  
74 that self-organised into spherical three-dimensional (3D) structures with a single epithelial  
75 layer and a central lumen (Sato et al., 2009; Barker et al., 2010). Since this initial discovery,  
76 organoids have been derived from a large number of different tissue types and from numerous  
77 mammalian species using similar ASC isolation and tissue culture techniques.

78 The development of *in vitro* organoid culture systems has transformed biomedical  
79 research as they provide a reproducible cell culture system that closely represents the  
80 physiology of the host. As the majority of infectious agents enter the body or reside at mucosal  
81 surfaces, organoids derived from mucosal sites such as the gastro-intestinal, respiratory and  
82 urogenital tracts promise to transform research into host-pathogen interactions as they allow  
83 detailed studies of early infection processes that are difficult to address using animal models.

84 Gastrointestinal (GI) disease in small ruminants has significant implications for animal  
85 health and welfare as well as substantial economic losses because of decreased production  
86 efficiency. In sheep, gastrointestinal nematodes (GIN) have major economic and welfare  
87 impacts worldwide, with the principal GIN of sheep including: *Haemonchus contortus*;  
88 *Nematodirus battus*; *Teladorsagia circumcincta* and *Trichostrongylus* spp. (including *T.*  
89 *colubriformis* and *T. vitrinus*) (Nieuwhof and Bishop, 2005; Roeber et al., 2013). These  
90 parasites are transmitted by the faecal-oral route where infective stage larvae develop in either  
91 the small intestine or abomasum (which is analogous to the gastric stomach) causing significant  
92 mucosal damage associated with host inflammatory immune responses (Stear et al., 2003;  
93 Roeber et al., 2013). In addition, sheep are natural reservoirs for enteric zoonotic pathogens of  
94 worldwide significance, such as Shiga toxin producing *Escherichia coli* (STEC) and  
95 *Salmonella enterica* (Heredia and García, 2018). The obvious challenge with studying  
96 interactions between the ovine host and GI pathogens is the lack of accessibility to the site of  
97 infection, making detailed studies particularly challenging. With the current lack of  
98 physiologically relevant *in vitro* cell culture systems to study ovine-GI pathogen interactions,

## Running Title: Sheep gastric and intestinal organoids

99 research has relied heavily on use of sheep infection models, which have led to important  
100 insights into host immune responses against pathogens, immune evasion by pathogens and  
101 pathogen transmission (Stear et al., 1995; McSorley et al., 2013; Ellis et al., 2014). Despite  
102 these successes, animal experiments are often complex, costly and have ethical implications.

103 The use of stem-cell derived GI organoids or “mini-guts” for farmed livestock species,  
104 including ruminants, is an exciting recent development that promises to provide a  
105 physiologically relevant and host-specific *in vitro* cell culture system to interrogate host-  
106 pathogen interactions (Beaumont et al., 2021; Kar et al., 2021). A recent study has  
107 demonstrated the feasibility of generating organoids from bovine ileum tissue with the derived  
108 organoids expressing genes associated with intestinal epithelia cell types (Hamilton et al.,  
109 2018). However, no ruminant gastric organoid model has been previously reported. In this  
110 current study, in line with 3Rs principles to reduce and replace the use of animals in  
111 experiments, we develop ovine ileum and abomasum organoids as physiologically relevant *in*  
112 *vitro* culture systems to investigate ovine GI infection and disease (Figure 1). Using RNA-seq  
113 of both tissue and derived organoids we demonstrate that the expression profile of abomasum  
114 and ileum organoids are representative of the tissue from which they were derived. In addition,  
115 we demonstrate the utility of these *in vitro* organoid systems to study host-pathogen  
116 interactions by performing challenge studies with the abomasal parasite *T. circumcincta* and  
117 enteric bacteria *Salmonella enterica* serovar Typhimurium.

118

## 119 2. Materials and Methods

120

### 121 2.1 Animals

122 All ovine abomasum and ileum tissues used in this study were derived from 7-8-month old  
123 helminth-free Texel cross male lambs (*Ovis aries*).

124

### 125 2.2 Isolation of gastric glands and intestinal crypts

126 Tissues were removed from sheep at post-mortem. Approximately 10 cm<sup>2</sup> sections of fundic  
127 gastric fold were collected from the abomasum and approximately 10 cm sections of ileal tissue  
128 were collected from a region ~ 30 cm distal to the ileocecal junction. Tissues were removed  
129 using a sterile scalpel and forceps and placed into sterile ice-cold Hank’s buffered saline  
130 solution (HBSS) containing 25 µg/ml gentamicin (G1397-10ML; Sigma-Aldrich) and 100  
131 U/ml penicillin/streptomycin. To expose the epithelial surfaces, the abomasum was opened  
132 along the greater curvature and the ileum opened longitudinally using dissection scissors. The  
133 luminal surfaces were rinsed with tap water to remove digesta and then placed onto sterile Petri  
134 dishes. The majority of the mucus layer was gently removed using a glass slide, after which  
135 the surface mucosal tissue (containing the gastric glands or intestinal crypts) was collected by  
136 firm scraping with a fresh glass slide. Mucosal tissue was then transferred to a Falcon tube  
137 containing 50 ml of HBSS containing 25 µg/ml gentamicin and 100 U/ml  
138 penicillin/streptomycin. Samples were centrifuged at 400 x g for 2 min, resulting in a tissue  
139 pellet with a mucus layer on top. The supernatant and top forming mucus layer were aspirated  
140 and discarded and the tissue was re-suspended in 50 ml of HBSS containing 25 µg/ml  
141 gentamicin and 100 U/ml penicillin/streptomycin. This process of centrifugation, aspiration  
142 and resuspension was repeated until a mucus layer was no longer visible above the pellet. To  
143 release gastric glands and intestinal crypts from tissue, pellets were re-suspended in 25 ml of  
144 digestion medium (Dulbecco’s Modified Eagle Medium [DMEM] high glucose, (11574486;  
145 Gibco) 1 % FBS, 20 µg/ml dispase (4942086001; Roche), 75 U/ml collagenase (C2674; Sigma-  
146 Aldrich) 25 µg/ml gentamicin and 100 U/ml penicillin/streptomycin) and incubated  
147 horizontally in a shaking incubator at 80 rpm for 40 minutes at 37 °C. Following digestion, the  
148 tube was gently shaken to loosen the cells and then left briefly at room temperature to allow large

## Running Title: Sheep gastric and intestinal organoids

149 tissue debris to settle. The supernatant was transferred to a sterile 50 ml Falcon tube and  
150 gland/crypt integrity within the supernatant was assessed by light microscopy. Samples were  
151 then centrifuged at 400 x g for 2 minutes, with the resulting supernatant containing released  
152 glands or crypts. The gland/crypt-containing supernatant was washed by centrifugation at 400  
153 x g for 2 minutes and the glands/crypts re-suspended in 1-2 ml advanced DMEM/F12 (12634-  
154 010; Gibco) containing 1X B27 supplement minus vitamin A (12587-010; Gibco), 25 µg/ml  
155 gentamicin and 100 U/ml penicillin/streptomycin.

156

### 157 **2.4 Organoid culture**

158 Two-hundred to one-thousand gastric glands or intestinal crypts were re-suspended in 100 µl  
159 advanced DMEM/F12 medium (containing 1X B27 supplement minus vitamin A, 25 µg/ml  
160 gentamicin and 100 U/ml penicillin/streptomycin) and were then added to 150 µl of BD Growth  
161 Factor Reduced Matrigel Matrix (356230; BD Biosciences). Fifty microliter droplets were  
162 added to consecutive wells of a 24-well tissue culture plate (3524, Corning). Plates were  
163 incubated at 37 °C, 5% CO<sub>2</sub> for 15-20 minutes to allow the Matrigel to polymerize and then  
164 550 µl of pre-warmed complete IntestiCult Growth Medium (mouse) (6005; STEMCELL  
165 Technologies) containing 500 nM Y-27632 (10005583; Cambridge Bioscience), 10 µM  
166 LY2157299 (15312; Cambridge Bioscience), 10 µM SB202190 (ALX-270-268-M001; Enzo  
167 Life Sciences) and gentamicin (50 µg/ml) were added to each well. Plates were incubated at  
168 37 °C, 5% CO<sub>2</sub> to allow organoids to develop, replacing complete IntestiCult medium every 2-  
169 3 days. Organoids were typically cultured for 7-14 days prior to passaging. Phase contrast  
170 microscopy was used to image organoids from passage one to passage five, following seven  
171 days of *in vitro* growth at each passage.

172

### 173 **2.5 Organoid passage**

174 IntestiCult media was removed from the cultured organoids and the Matrigel matrix was  
175 dissolved by replacement with 1 ml ice-cold advanced DMEM/F12. The re-suspended  
176 organoids were transferred to a 15 ml Falcon tube and the total volume of advanced  
177 DMEM/F12 was increased to 10 ml. Samples were left on ice for 5 minutes to allow organoids  
178 to settle and the supernatant was removed. The organoids were re-suspended in 200 µl  
179 advanced DMEM/F12 medium (containing 1X B27 supplement minus vitamin A, 25 µg/ml  
180 gentamicin and 100 U/ml penicillin/streptomycin) and then mechanically disrupted by  
181 repeatedly pipetting (approximately fifty times) using a 200 µl pipette tip bent at a 90° angle.  
182 The number of organoid fragments were counted by light microscopy and samples diluted to  
183 200-1000 crypts per 100 µl. One-hundred microliters of fragments were then combined with  
184 Matrigel and plated into 24-well tissue culture plates as described in section 2.4. Phase contrast  
185 microscopy was used to image organoids from passage one to passage five, following seven  
186 days of *in vitro* growth at each passage.

187

### 188 **2.6 Organoid cryopreservation**

189 IntestiCult media was removed from the cultured organoids and the Matrigel matrix was  
190 dissolved by replacement with 1 ml ice-cold advanced DMEM/F12. The re-suspended  
191 organoids were transferred to a microcentrifuge tube and pelleted by centrifugation at 290 x g  
192 for 5 minutes at 4 °C. Following centrifugation, the supernatant was removed and organoid  
193 pellets were re-suspended in Cryostor CS10 cryopreservation medium (STEMCELL  
194 Technologies) at approximately 500-1000 organoids/ml before being transferred to a cryovial.  
195 Cryovials were stored in a cryogenic freezing container for 2 hours at -80 °C and subsequently  
196 transferred to -196 °C for long-term storage.

197 Cryopreserved organoids were resuscitated by thawing cryovials in a water bath at 37  
198 °C and then rapidly transferring the organoids into a 15 ml Falcon tube containing 8 ml of



## Running Title: Sheep gastric and intestinal organoids

199 advanced DMEM/F12 medium (containing 1X B27 supplement minus vitamin A, 25 µg/ml  
200 gentamicin and 100 U/ml penicillin/streptomycin). The cryovial was washed with a further 1  
201 ml of media and added to the Falcon tube. Samples were pelleted by centrifugation at 290 x g  
202 for 5 minutes at 4 °C and then re-suspended in 200 µl of fresh advanced DMEM/F12 medium  
203 (containing 1X B27 supplement minus vitamin A, 25 µg/ml gentamicin and 100 U/ml  
204 penicillin/streptomycin). Re-suspended organoids were added to Matrigel and cultivated as  
205 described in Section 2.4. Organoids were imaged by phase contrast microscopy following  
206 seven days of *in vitro* growth prior to cryopreservation and post-cryopreservation.  
207

### 208 **2.7 Total RNA extraction**

209 Total RNA was extracted from gastric and intestinal organoids after multiple serial passages  
210 that included passage 0 (P0) through to passage 4 (P4). Ovine gastric and intestinal organoids  
211 were prepared as described above; organoids that were formed from animal tissue-derived  
212 crypts were designated P0 and these were cultured by serial passage until P4. Each passage  
213 was cultured in triplicate wells of a 24-well tissue culture plate and allowed to mature for seven  
214 days before collecting for total RNA extraction. For total RNA extraction, IntestiCult media  
215 was removed from wells and replaced with 1 ml of ice-cold advanced DMEM/F12. The  
216 resulting suspension containing dissolved Matrigel and organoids was transferred to 15 ml  
217 sterile Falcon tubes and brought up to 10 ml with ice-cold advanced DMEM/F12. Organoids  
218 were gently pelleted by centrifugation at 200 x g for 5 min and the supernatant removed.  
219 Organoid pellets were re-suspended in 350 µl RLT buffer (Qiagen) containing β-  
220 mercaptoethanol, according to manufacturer's guidelines and stored at -70°C. Total RNA was  
221 isolated from each sample using a RNeasy mini kit (Qiagen) with the optional on-column  
222 DNase digest and total RNA eluted in 30 µl nuclease-free water, according to the manufacturers  
223 protocol. Total RNA from each extraction was quantified using a NanoDrop™ One  
224 spectrophotometer and integrity analysed using a Bioanalyzer (Agilent) with the RNA 6000  
225 Nano kit. Purified total RNA was stored at -70°C until RNA-seq analysis.

226 Total RNA was also extracted from ovine abomasum and ileum tissue harvested at post-  
227 mortem from five individual 6-month old helminth-free Texel cross lambs and stored in  
228 RNAlater (ThermoFisher). Specifically, samples were taken from the same tissue regions  
229 stated above for crypt isolation. For total RNA isolation, approx. 30 mg of tissue was  
230 homogenized in 600 µl of RLT buffer containing β-mercaptoethanol using a Precellys® Tissue  
231 Homogenizer with CK28 tubes using x3 10s pulses at 5500 rpm with 5 min on ice between  
232 each pulse (Bertin Instruments™). Total RNA was isolated and quantified as described  
233 previously, except the total RNA was eluted in 50 µl nuclease-free water. Purified total RNA  
234 was stored at -70°C until RNA-seq analysis.  
235

### 236 **2.8 RNA-seq Analysis**

237 For each sample, 1 µg of total RNA was used for RNA-seq analysis. All library synthesis and  
238 sequencing were conducted at The University of Liverpool, Centre for Genomic Research  
239 (CGR). In brief, dual-indexed, strand-specific RNA-seq libraries were constructed from  
240 submitted total RNA sample using the NEBNext® Poly(A) mRNA Magnetic Isolation Module  
241 (NEB #E7490) and NEBNext Ultra II Directional RNA Library Prep Kit for Illumina (NEB  
242 #E7760). A total of 20 libraries were constructed [including: ovine abomasum organoid P0-P4  
243 (triplicate pooled wells for each passage); ovine ileum organoid P0-P4 (triplicate pooled wells  
244 for each passage); ovine abomasum tissues (n = 5); ovine ileum tissues (n = 5)]. The barcoded  
245 individual libraries were pooled and sequenced on a single lane of an Illumina NovaSeq  
246 flowcell using S1 chemistry (Paired-end, 2x150 bp sequencing, generating an estimated 650  
247 million clusters per lane). Following sequencing adaptors were trimmed using  
248 Cutadapt version 1.2.1 (Martin, 2011) and reads were further trimmed using Sickle version

## Running Title: Sheep gastric and intestinal organoids

249 1.200 (Joshi and Fass, 2011) with a minimum window quality score of 20. Reads shorter than  
250 15 bp after trimming were removed. Sequence reads were checked for quality using FastQC  
251 v0.11.7. Reads were pseudo-aligned to the *Ovis aries* transcriptome (Oar\_v3.1  
252 GCA\_000298735.1) using Kallisto v0.46.2 with default settings (Bray et al., 2016) and read  
253 abundance calculated as transcripts per million (TPM). Gene expression data was analysed by  
254 principal component analysis (PCA) using pcaExplorer version 2.12.0 R/Bioconductor  
255 package (Marini and Binder, 2019). Specific genes were also manually retrieved from our  
256 transcriptomic dataset and their TPM values  $\log_2$  transformed for presenting in heat maps,  
257 which were generated using GraphPad Prism software (v8.0).

258

### 259 **2.9 Immunohistochemistry**

260 Abomasum and ileum organoids were cultivated in Matrigel for 7 days in 8-well chamber slides  
261 (354118; Falcon) as described in section 2.4. To make organoids accessible to  
262 immunohistochemistry reagents, the culture medium was removed and replaced with ice-cold  
263 4% paraformaldehyde. For fixation, samples were kept at 4 °C for 20 minutes to also dissolve  
264 the Matrigel and prevent it from re-solidifying. Organoids were washed twice with IF buffer  
265 (0.1% Tween20 in PBS) and then permeabilised with 0.1% TritonX-100 in PBS for 20 minutes  
266 at room temperature. Samples were washed three times with IF buffer and then blocked for 30  
267 minutes with 1% BSA in IF buffer at room temperature. Next, primary antibodies diluted in  
268 blocking solution were added to the organoids and samples were left overnight at 4 °C. Primary  
269 antibodies used included polyclonal rabbit  $\alpha$ -Ki67 (ab15580, abcam, used at a 1:500 dilution),  
270 polyclonal rabbit  $\alpha$ -EPCAM (orb10618, Biorbyt, used at a 1:600 dilution), monoclonal mouse  
271  $\alpha$ -villin (sc-58897, Santa Cruz Biotechnology, used at a 1:200 dilution) and monoclonal mouse  
272  $\alpha$ -pan cytokeratin (used at a 1:100 dilution). For isotype controls, mouse or rabbit IgG were  
273 used in place of the specific primary antibodies and were diluted at 1:100 or 1:500 for mouse  
274 and rabbit IgG respectively. The next day, samples were washed three times with IF buffer and  
275 then secondary antibodies added (diluted at 1:500 in blocking buffer) and incubated at room  
276 temperature for 1 hour. Secondary antibodies used were goat  $\alpha$ -mouse Alexa Fluor 488  
277 (ab150117, abcam) and goat  $\alpha$ -rabbit Alexa Fluor 488 (ab150081, abcam). Phalloidin-iFluor  
278 555 reagent (ab176756, abcam, used at a 1:1000 dilution) was also added during the secondary  
279 antibody step to label F-actin. Samples were washed three times with IF buffer and then  
280 Hoechst 33258 solution diluted 1:200 in IF buffer was added to label nuclei (94403, Sigma-  
281 Aldrich). Samples were incubated for a further 5 minutes at room temperature before three  
282 washes with IF buffer. Finally, slides were mounted using ProLong Gold antifade mountant  
283 (P10144, ThermoFisher Scientific) and imaged by confocal microscopy using a Zeiss LSM  
284 710 Inverted Confocal Microscope and Zeiss Zen Black operating software.

285

### 286 **2.10 Exsheathment of *Teladorsagia circumcincta* third stage larvae (L3)**

287 *T. circumcincta* L3 (Moredun isolate MTci2, CVL) were exsheathed and labelled using  
288 modified protocols previously published (Dinh et al., 2014; Bekelaar et al., 2019). Nine  
289 milliliters of Earle's balanced salts solution (EBSS) buffer in a 15 ml Falcon tube was preheated  
290 in a water bath to 37 °C and CO<sub>2</sub>-saturated over 1 hour using an incubator tube connected to a  
291 CO<sub>2</sub> tank. Approximately  $5 \times 10^4$  *T. circumcincta* L3 in 1 ml of tap water were added to the  
292 CO<sub>2</sub>-saturated EBSS and the sample continued to be saturated for a further 15 minutes. The  
293 Falcon tube was then sealed with Parafilm® M and inverted 6 times before being placed  
294 horizontally into an incubator at 37 °C, 5% CO<sub>2</sub> for 4 hours. Following incubation, the whole  
295 sample was transferred into a 25 cm<sup>2</sup> vented cap flask and incubated overnight at 37 °C /5%  
296 CO<sub>2</sub>, to allow L3s to continue exsheathing. Exsheathment was validated the following morning  
297 by light microscopy. The larvae were then washed 4 times by repeated centrifugation at 330 x  
298 g for 2 minutes and re-suspension in 50 ml of distilled water (pre-warmed to 37°C). After the

## Running Title: Sheep gastric and intestinal organoids

299 final wash, the L3 larvae were re-suspended in 1 ml distilled water and transferred to a  
300 microcentrifuge tube. Exsheathed L3 (exL3) were fluorescently labelled by the addition of 2  
301  $\mu$ l PKH26 dye (1 mM stock concentration) from the MINI26 PKH26 Red Fluorescent Cell  
302 Linker Kit (Sigma-Aldrich) and mixed by pipetting. Parasites were incubated with the dye for  
303 15 minutes at room temperature, protected from light. Excess dye was removed by washing the  
304 larvae five times with distilled water as described above before finally re-suspending them in  
305 1 ml of complete IntestiCult organoid growth medium.

306

### 307 **2.11 *Teladorsagia circumcincta* L3-organoid co-culture**

308 Abomasum and ileum organoids were cultivated in Matrigel for 7 days in 8-well chamber slides  
309 (354118; Falcon) as described in section 2.4. Immediately prior to organoid-*T. circumcincta*  
310 co-culture, complete IntestiCult media was removed from the cultured organoids and replaced  
311 with 250  $\mu$ l of fresh pre-warmed complete IntestiCult. Twenty to 50 PKH26 labelled *T.*  
312 *circumcincta* exL3 in 50  $\mu$ l complete IntestiCult media were added to each well of organoids  
313 and organoid-larval cultures incubated at 37°C, 5% CO<sub>2</sub>. Note that organoids were not removed  
314 from their Matrigel domes prior to the addition of *T. circumcincta* L3. Upon observation of  
315 multiple organoids containing *T. circumcincta* L3 within their lumen (after ~24-48 hours of  
316 organoid-*T. circumcincta* co-culture) the samples were fixed with 4% PFA for 30 min,  
317 followed by 3 washes with PBS, and stored at 4°C until fluorescence staining. Organoids were  
318 permeabilized, blocked and probed with Phalloidin-488 and Hoechst 33258 as described for  
319 organoid immunohistochemistry above. Images were captured using a Zeiss LSM 710 Inverted  
320 Confocal Microscope and Zeiss Zen Black operating software.

321

### 322 **2.12 Generation of apical-out organoids**

323 Epithelial polarity was inverted in gastric and intestinal ovine organoids by following a  
324 previously published method for reverse polarity in human intestinal organoids (Co et al.,  
325 2019). Briefly, gastric and intestinal organoids were grown in Matrigel as described above for  
326 7 days. Matrigel domes containing developed organoids were gently dissolved by the addition  
327 of 500  $\mu$ l ice-cold 5 mM EDTA in PBS, taking care not to rupture the organoids. The resulting  
328 suspension was transferred to a 15 ml Falcon tube that was subsequently filled with 14 ml of 5  
329 mM EDTA in PBS. Samples were placed on a rocker and mixed gently for 1 hour at 4 °C.  
330 Organoids were pelleted by centrifugation at 200 x g for 3 min at 4 °C and the supernatant was  
331 removed. Pellets were re-suspended in complete IntestiCult growth media (containing 500 nM  
332 Y-27632, 10  $\mu$ M LY2157299, 10  $\mu$ M SB202190 and gentamicin (50  $\mu$ g/ml), with the addition  
333 of 10 % advanced DMEM/F12 medium (containing 1X B27 supplement minus vitamin A, 25  
334  $\mu$ g/ml gentamicin and 100 U/ml penicillin/streptomycin). Re-suspended organoids were  
335 transferred to the wells of 8-well glass chamber slides and incubated at 37 °C, 5 % CO<sub>2</sub> for a  
336 period of 72 hours, prior to being fixed and stained with Phalloidin-iFluor 555 reagent and  
337 Hoechst 33258, as described in section 2.9. Confocal imaging was performed as described in  
338 section 2.9.

339

### 340 **2.13 Infection of apical-out organoids with *Salmonella enterica* serovar Typhimurium**

341 The polarity of gastric and intestinal organoids was inverted as described above. *Salmonella*  
342 Typhimurium strain ST4/74 was chosen for this experiment as its full genome sequence is  
343 available (Richardson et al., 2011) and it has been shown to efficiently invade the ovine ileal  
344 mucosa and elicit inflammatory responses in an ovine ligated ileal loop model (Uzzau et al.,  
345 2001). To aid visualization of the bacteria in organoids, the strain was electroporated with  
346 plasmid pFPV25.1 which carries *gfpmut3A* under the control of the *rpsM* promoter resulting in  
347 the constitutive synthesis of green fluorescent protein (Valdivia and Falkow, 1996). Stability  
348 of the plasmid in the absence of antibiotic selection during *Salmonella* infection has been

## Running Title: Sheep gastric and intestinal organoids

349 confirmed (Vohra et al., 2019). The bacteria were grown on Luria Bertani (LB) agar  
350 supplemented with 100 µg/ml ampicillin at 37 °C overnight. Single colonies were transferred  
351 to LB broth supplemented with the same antibiotic and grown for 20 hours shaking at 180 rpm  
352 at 37 °C. The liquid cultures were diluted to  $3.3 \times 10^6$  CFU/ml in complete IntestiCult growth  
353 medium, described above, and 300 µl of the dilution was added to half of the wells, which  
354 already contained organoids that had already been maintained in conditions for generating  
355 apical-out organoids for 72 hours. The other half of the wells acted as negative controls, with  
356 organoids being re-suspended in 300 µl of complete IntestiCult growth medium alone (no  
357 bacteria). After 30 minutes of incubation another 300 µl of complete IntestiCult growth  
358 medium with 200 µg/ml gentamycin was added to kill extracellular bacteria. The slides were  
359 incubated at 37 °C, 5% CO<sub>2</sub> for a total of 6 hours. At the end of the incubation period the entire  
360 volume of the liquid from each well, including the organoids, were transferred to separate 15ml  
361 Falcon tubes (Corning, UK). All centrifugations for organoid collection during washing were  
362 done at 200 rpm for 5 minutes. The supernatant was removed and the organoids were washed  
363 twice in PBS, and then re-suspended in 4% PFA for 30 minutes for fixation. The organoids  
364 were processed for immunohistochemistry as described in section 2.9 and stained with  
365 Phalloidin-iFluor 555 reagent, prior to mounting with ProLong Diamond antifade mountant  
366 (P36961, ThermoFisher Scientific). Confocal imaging was performed as described in section  
367 2.9.

368

### 369 **3. Results**

#### 370 **3.1 Growth of ovine gastrointestinal organoids *in vitro***

371 Fragmented gastric glands and intestinal crypts isolated from the abomasum fundic fold and  
372 the ileum of 7 to 8-month old Texel cross lambs were embedded in Matrigel and grown in  
373 complete IntestiCult organoid growth medium. Under identical growth conditions, epithelial  
374 stem cells from these two different organ tissues were able to develop into organoids *in vitro*  
375 (Figure 2A). By 24 hours, sealed spherical structures containing a central lumen had formed in  
376 both the abomasum and ileum organoids. However, while the ileum organoids became  
377 branched after 5-7 days of *in vitro* culture, the vast majority of abomasum organoids retained  
378 a spherical structure that persisted for the duration of a culture passage (Figure 2A, B).

379 Abomasum and ileum organoids could be serially passaged by removal from Matrigel,  
380 fragmentation by pipetting and re-embedding in Matrigel. At each passage, ileum organoids  
381 continued to form into branched structures, while the abomasum organoids persistently formed  
382 spherical structures. (Figure 2B). Organoids that were cryopreserved in liquid nitrogen after 7  
383 days of *in vitro* culture could be thawed and re-cultured, demonstrating the potential to store  
384 organoids long-term and to resuscitate when required. Furthermore, we found that the  
385 cryopreserved organoids can be resuscitated after at least 18 months of storage in liquid  
386 nitrogen. Abomasum and ileum organoids retained their spherical and branched structures,  
387 respectively, following resuscitation and 7 days of *in vitro* culture (Figure 2C).

388

#### 389 **3.2 Epithelial cell markers associated with ovine gastric and intestinal organoids**

390 Immunohistochemistry was performed to identify key structural features associated with both  
391 abomasum and ileum organoids. Individual Z-stack images of organoids stained with  
392 phalloidin to label F-actin clearly demonstrated that the apical surface of the epithelium is  
393 present on the interior of the organoid, for both abomasum and ileum organoids, indicated by  
394 the presence of a solid F-actin-positive boundary (Figure 3A, 4A). This imaging also confirmed  
395 the presence of a hollow lumen within the organoids (Figure 3A, 4A).

396 The proliferation marker Ki67 was detectable in both the abomasum and ileum  
397 organoids, indicating that cell division continued to take place after 7 days of *in vitro* culture  
398 (Figure 3B, 4B). The epithelial cell markers EpCAM (epithelium cell adherence molecule),



## Running Title: Sheep gastric and intestinal organoids

399 villin (epithelium-specific actin-binding protein) and cytokeratin (epithelial cell cytoskeleton  
400 filament protein) were each detectable in abomasum and ileum organoids (Figure 3B, 4B),  
401 confirming the differentiation of stem cells into epithelium cell-containing organoids. Control  
402 samples of organoids probed with mouse and rabbit serum IgG did not label positive for any  
403 of the epithelial cell markers, confirming the specificity of the epithelial cell labelling (Figure  
404 S1, S2).

405

### 406 **3.3 Transcriptional analysis of abomasum and ileum organoids and tissue**

407 Gene expression profiles from: ovine ileum organoids (P0 – P4); ovine abomasum organoids  
408 (P0 – P4); ovine ileum tissue (n = 5) and ovine abomasum tissue (n = 5) were compared by  
409 RNA-seq analysis. The global gene expression profiles of the complete dataset, consisting of  
410 20 individual samples, were initially compared by principal component analysis (PCA) (Figure  
411 5). The PCA analysis resulted in four statistically significant clusters (with 95% confidence  
412 intervals), with each cluster representing a sample type (i.e. ileum organoids; abomasum  
413 organoids; ileum tissue; or abomasum tissue). This initial analysis demonstrates that replicate  
414 samples collected from either ileum tissue (n = 5) or abomasum tissue (n = 5) group by tissue  
415 type showing that the global transcript signature of ileum and abomasum tissue differ. Based  
416 on global gene expression profiles, organoids also grouped by the tissue type from which they  
417 derived, with ileum and abomasum organoids forming separate statistically significant clusters  
418 (95% confidence intervals) in the PCA analysis (Figure 5). Importantly, for both ileum and  
419 abomasum organoids, each passage (P0 – P4) is represented in each cluster, showing that there  
420 was no global change in the transcriptome profile following serial passage (Figure 5).

421 The expression profiles of the top 40 most variable genes (of genes ranked by inter-  
422 sample variation) were compared from ileum and abomasum organoids from serial passages  
423 (P0 – P4) and ileum and abomasum tissue derived from five lambs (n = 5) (Figure 6). This  
424 analysis broadly identified three categories of genes, including genes with: i) abomasum (tissue  
425 and organoid) specific expression; ii) ileum (tissue and organoid) specific expression and iii)  
426 ileum and abomasum (tissue only) expression.

427 Based on gene expression profiles, genes that were highly expressed in abomasum  
428 tissue and abomasum organoids, but absent in all ileum samples, included genes of known  
429 gastric function, such as: *claudin-18*; *gastrokine*; *gastric lysozyme* and *pepsin*. Similarly, ileum  
430 specific genes were detected in both ileum tissue and ileum organoid samples, but absent from  
431 all abomasum samples included: *galectin*; *lingual antimicrobial peptide*; *guanylin* (a 15 amino  
432 acid peptide secreted from goblet cells). Interestingly, genes shared by ileum tissue and  
433 abomasum tissue, but largely absent from organoid cultures, were predominantly immune  
434 related genes (such as: C-C motif chemokine 5, regakine-1-like and various immunoglobulin  
435 chains) and likely reflect the presence of immune cells in ileal and abomasal mucosal tissue  
436 samples, which were not represented in ASC derived ileum and abomasum organoids. In  
437 summary, based on transcriptional profiles, abomasum and ileum organoids are broadly  
438 representative of the tissues they were derived from and appear to be transcriptionally stable  
439 over multiple passages.

440

### 441 **3.4 Expression of cell- and tissue-specific genes in abomasum and ileum organoids and** 442 **tissues**

443 The ovine gastrointestinal transcriptomic database generated here was manually searched for  
444 genes that are representative of specific cell and tissue markers. A total of 151 genes were  
445 searched in this way and their expression in abomasum and ileum organoids and tissue was  
446 presented in heat maps. A number of cell junction markers were consistently expressed in both  
447 organoids and tissue, including genes encoding proteins related to tight junctions, gap  
448 junctions, adherens junctions and desmosomes (Figure S3).

## Running Title: Sheep gastric and intestinal organoids

449 We identified genes associated with particular epithelial cell subpopulations that were  
450 consistently expressed in abomasum and ileum organoids across multiple passages (P0-P4), as  
451 well as in ileum and abomasum tissue samples from five individual animals. These include  
452 numerous markers associated with stem cells, enterocytes, secretory and mucus-producing  
453 cells and Paneth cells (Figure 7). In particular, expression of the stem cell marker LGR5 was  
454 higher in both abomasum and ileum organoids compared to the respective tissue samples,  
455 indicating the presence of a relatively higher stem cell subpopulation in the organoids  
456 compared to tissues (Figure 6). Three enterocyte genes associated with ileum tissue were not  
457 detected in ileum organoids, namely *ALPI*, *APOA4* and *APOC3* (Figure 7). These enterocyte  
458 markers were not detected in abomasum organoids or abomasum tissue from any of the five  
459 individual animals. Expression of several genes associated with homeostasis in gastrointestinal  
460 cells was conserved between tissue samples and organoids, for both abomasum and ileum  
461 samples. This included *HES1*, *ADAM10*, *ADAM17*, *FGF20* and *SHH* (Figure 7).

462 A number of genes associated with specific epithelial cell subpopulations were  
463 differentially expressed in ileum and abomasum tissue. For example, the early enterocyte  
464 precursor-associated gene *REG3G*, the Paneth cell marker *DEFB1*, the enteroendocrine cell  
465 marker *REG4* and the enteroendocrine cell-derived hormone *GCG* were expressed in ileum  
466 tissue and not in abomasum tissue (Figure 7). These genes were also expressed in intestinal  
467 organoids and not abomasum organoids, indicating the conservation of tissue-specific  
468 differences in the cell subpopulations of the two different types of organoids.

469 Various genes were found to be specific for the abomasum, being expressed in both  
470 abomasal tissue and abomasum organoids but not in ileal tissue or ileum organoids. These  
471 included *PGA5*, *CCKBR* and *CBLIF* (*GIF*) (Figure 8). We also found that some genes  
472 specifically expressed in abomasal tissue were not expressed in abomasum organoids,  
473 including *SLC5A5*, *DUOX2*, *MCT9*, *PGC*, *ATP4A*, *AQP4*, and *HDC* (Figure 8).

474 The expression of immune-related genes, including toll-like receptors (TLRs), c-type  
475 lectin receptors (CLRs), chemokines, cytokines and antimicrobials were examined in  
476 abomasum and ileum tissue and organoids. The TLRs - *TLR3*, *TLR5* and *TLR6*, and CLR  
477 *Dectin-1* were expressed in abomasum and ileum organoids and their respective tissues (Figure  
478 S4). A number of chemokines were expressed in abomasum organoids and abomasal tissue,  
479 including *CXCL16*, *CCL20*, *CCL24* and *ACKR3*. Interestingly, the chemokine *CCL17* was up-  
480 regulated in abomasum and ileum organoids compared to the respective tissue samples (Figure  
481 S4). The expression of cytokine associated genes *IL18BP*, *IL27RA*, *IL411*, *IL13RA1* and  
482 *IFNGR1* was detected in abomasum and ileum organoids (Figure S4). Of note, the  
483 antimicrobial gene *SBD2* was found to be highly expressed in ileum and ileal tissue, but was  
484 not expressed in either abomasum organoids nor abomasal tissue (Figure 6, Figure S4).

485

### 486 **3.5 Organoid co-culture with the helminth *Teladorsagia circumcincta***

487 In order to use gastrointestinal organoids to study host-pathogen interactions *in vitro*, it is  
488 important to be able to challenge organoids with the pathogen-of-interest. Here, we co-cultured  
489 abomasum and ileum organoids with larvae of the important ruminant helminth parasite *T.*  
490 *circumcincta*. Infective, third stage larvae (L3) were ex-sheathed *in vitro* and labelled with the  
491 lipophilic dye PKH26. Labelled larvae were added directly to the well of a 24-well tissue  
492 culture plate containing abomasum or ileum organoids embedded in Matrigel and complete  
493 IntestiCult growth media. A number of *T. circumcincta* L3 penetrated the Matrigel, of which  
494 approximately 50% subsequently burrowed into central lumen of the organoids by 24 hours  
495 post-incubation, with some individual L3 invading the organoids as early as 2 hours. This  
496 indicated that it was possible to infect the organoids with the parasite in the correct orientation  
497 (i.e. with the parasite residing at the luminal surface of the organoid) without having to  
498 mechanically disrupt the organoids to allow access to the central lumen. *T. circumcincta* L3

## Running Title: Sheep gastric and intestinal organoids

499 were equally effective at infecting both abomasum and ileum organoids and motile larvae were  
500 still present after 14 days of co-culture. While we mainly observed abomasum organoids  
501 containing single larvae (Figure 9A), we found multiple larvae residing in the lumen of the  
502 larger ileum organoids (Figure 9B). Z-stack analysis on fixed samples showed worms were  
503 present within the lumen of the organoids and demonstrated L3 larvae burrowing directly  
504 through the epithelium of abomasum and ileum organoids to access the central lumen (Figure  
505 9C).

506

### 507 **3.6 Generation of apical-out organoids and infection with *Salmonella typhimurium***

508 It is necessary to expose the apical surface of the organoid epithelia in order to have a working  
509 co-culture system for some pathogens. A recently published protocol (Co et al., 2019)  
510 described a method to invert the basal-out orientation of the abomasum and intestinal  
511 organoids. When the organoids were removed from Matrigel and incubated in 5 mM EDTA  
512 for 1 hour, the polarity of both the abomasum and intestinal organoids was reversed following  
513 72 hours' incubation in complete IntestiCult growth medium. F-actin staining of fixed organoid  
514 samples clearly highlighted the apical surface of the epithelium, which is initially internally  
515 located in basal-out abomasum and ileum organoids; however, after removing the extra cellular  
516 matrix from the organoids, the apical surface became positioned on the exterior surface of the  
517 organoids, with a microvilli brush edge apparent by confocal microscopy (Figure 10A, B).

518

519 To demonstrate the utility of apical-out ovine gastric and intestinal organoids as an *in vitro*  
520 model for host-pathogen interactions, the apical-out organoids were exposed to the bacterial  
521 pathogen *Salmonella enterica* serovar Typhimurium, which is known to invade the epithelium  
522 via the apical surface (Finlay and Falkow, 1990). After 6 hours of organoid-bacteria co-culture  
523 freely suspended in complete IntestiCult growth medium, GFP-expressing *S. Typhimurium*  
524 were identifiable attached to the apical surface and within epithelial cells of the organoids by  
525 confocal microscopy. Although *S. Typhimurium* is an intestinal pathogen, here we observed  
526 GFP-expressing bacteria attached to both abomasum and ileum apical-out organoids (Figure  
527 10C).

528

## 529 **4. Discussion**

530 Ruminants are key food-producing animals worldwide, providing a nutrient source to billions  
531 of people. Furthermore, dependency upon ruminants as a food source continues to increase in  
532 order to meet growing global dietary requirements. Gastrointestinal disease in ruminants is a  
533 major concern and accounts for significant economic losses and reduction in production  
534 efficiency. It is therefore important that ruminant health and welfare is improved through  
535 prevention and control of disease in order to meet ethical, economic and nutrient demands  
536 (Sargison, 2020).

537 An obvious challenge with studying gastrointestinal host-pathogen interactions *in vivo*  
538 is the internal nature of infections and the physical barriers associated with directly observing  
539 them. Therefore, a useful advancement for studying such infections is the development of a  
540 physiologically relevant *in vitro* model systems that allows experimental interrogation of host  
541 and pathogen interactions in fine detail. Stem cell-derived organoids have become a prominent  
542 feature of modern cell and tissue biology in recent years, representing *in vitro* cell cultures that  
543 retain structural and functional properties of the *in vivo* organ/tissue they represent (Clevers,  
544 2016). To date, organoid cultivation has been achieved for numerous and diverse organs and  
545 tissues from different host species. In particular, organoids derived from gastrointestinal tissue  
546 have been generated for numerous livestock species, including cattle (Hamilton et al., 2018;  
547 Beaumont et al., 2021). However, the vast majority of these have been organoids representing  
548 the intestinal tract. Here, we demonstrated the ability to cultivate organoids from gastric and

## Running Title: Sheep gastric and intestinal organoids

549 intestinal tissues of a small ruminant host and, to our knowledge, this is the first demonstration  
550 of organoids representing the gastric system of a ruminant.

551 Following the same protocol and using the same *in vitro* culture conditions, we report  
552 the ability to cultivate tissue-specific gastric and intestinal organoids from sheep. By comparing  
553 gene expression profiles between tissue and organoids, we found that when grown in identical  
554 conditions *in vitro*, stem cells from gastric glands developed into organoids that retained key  
555 characteristics associated with abomasum tissue. Stem cells from ileal crypts, on the other  
556 hand, developed into organoids which conserved important gene expression profiles associated  
557 with the ileum.

558 Ruminants, including cattle, sheep and goats are polygastric, in that they have a four-  
559 chambered gastric system. The fourth chamber, the abomasum, is most closely akin to the  
560 stomach of monogastric animals. An important differentiating characteristic between  
561 abomasum and ileum tissue is the expression of the digestive stomach enzyme pepsinogen in  
562 the abomasum (Mostofa et al., 1990). Another digestive protease associated with the  
563 abomasum in ruminants is lysozyme, which is highly expressed in this compartment (Stevens  
564 and Hume, 1998). Importantly, we found that both pepsinogen and lysozyme are expressed in  
565 abomasum organoids and not in ileum organoids. We also found evidence of parietal cells  
566 specifically present in abomasum organoids and not ileum organoids. This was indicated by  
567 the detection of *CCKBR* mRNA only in abomasum organoids and tissue following  
568 transcriptomic analysis. *CCKBR* is a cholecystokinin receptor expressed in the gastric and  
569 central nervous systems and more specifically it is associated with parietal cells in the stomach  
570 (Kulaksiz et al., 2000; Schmitz et al., 2001; Engevik et al., 2019). Conversely, we also  
571 identified genes whose expression was specific to ileum tissue that were also expressed in  
572 ileum organoids and not in abomasum organoids. For example, *REG4*, a marker of  
573 enteroendocrine cells (specifically enterochromaffin cells) in intestinal epithelia (Gehart et al.,  
574 2019) and *SBD2*, an antimicrobial sheep beta-defensin associated with the mucosal surface of  
575 small intestinal crypts (Meyerholz et al., 2004) were found to be specifically and abundantly  
576 expressed in ileum tissue and organoids and not abomasum. Collectively, these key differences  
577 in gene expression indicates that the two different types of organoid are tissue-specific and  
578 representative of the tissue from which the stem cells are derived. We also found that a number  
579 of genes used in previous studies as gastrointestinal epithelial markers (Hamilton et al., 2018)  
580 were not detected in our transcriptomic analysis of ileal or abomasal tissue from five individual  
581 animals, suggesting these genes are not reliable markers of gastrointestinal epithelia in sheep.

582 A necessary feature of an organoid cell line is the conservation of gene expression  
583 profiles across multiple passages. Transcriptomic analysis of abomasum and ileum organoid  
584 samples collected across five consecutive passages revealed that gene expression profiles were  
585 consistent. Further analysis of the expression of specific cell markers indicated that the  
586 diversity of epithelial cell types was also maintained across multiple passages. That the  
587 different organoid types maintain their tissue specificity and cell diversity, as well as the ability  
588 to cryopreserve them makes them a robust model that will ensure reproducibility across  
589 experiments, as well as reducing the reliance on deriving material from animals and thereby  
590 reducing the number of animals used in associated research.

591 To demonstrate the effectiveness of ovine gastric and intestinal organoids for modelling  
592 pathogen infections *in vitro*, we exposed abomasum and ileum organoids to different pathogens  
593 and showed they could invade them. It has been recognized that gastrointestinal organoids  
594 could represent useful *in vitro* models for studying helminth infections (Duque-Correa et al.,  
595 2020). However, to-date this has been limited to applying worm excretory and secretory  
596 products to organoids, or growing organoids from helminth-infected mice, as opposed to live  
597 host-parasite co-cultures (Eichenberger et al., 2018a, 2018b; Nusse et al., 2018; Luo et al.,  
598 2019; Duque-Correa et al., 2020). Here, we applied a very simple method of adding ex-



## Running Title: Sheep gastric and intestinal organoids

599 sheathed *T. circumcincta* L3 directly to the growth media of organoids that were embedded in  
600 Matrigel. We found that after 24 hours, worms had burrowed through the Matrigel dome and  
601 into the lumen of individual organoids. We were also able to capture direct *T. circumcincta*  
602 invasion through the epithelium in both abomasum and ileum organoids. Furthermore, motile  
603 worms were observed at least 14 days following organoid invasion, demonstrating the potential  
604 to prolong parasite survival *in vitro* and to perform more long-term studies on the parasite  
605 compared to worms cultured under previous *in vitro* methods (*pers comms*).

606 Gastrointestinal pathogens that invade the epithelial mucosa commonly interact with  
607 the apical surface of epithelial cells. However, the innate polarity of mammalian  
608 gastrointestinal organoids grown in Matrigel is with the apical surface on the inside of the  
609 organoid. Various approaches have previously been used to expose pathogens to the apical  
610 surface of the epithelium, including microinjection directly into the lumen of the organoid,  
611 fragmentation of organoids and open-format 2D monolayers. A recent publication also  
612 demonstrated the ability to reverse the polarity of human ileum organoids by the removal of  
613 Matrigel and extracellular matrix proteins (Co et al., 2019). This has since been replicated in  
614 porcine ileum organoids (Beaumont et al., 2021) and here, we showed that ruminant ileum  
615 organoids can also have the polarity reversed following the same method. We also  
616 demonstrated that the polarity of gastric organoids can be reversed to an apical-out  
617 conformation. The ability to expose the apical surface of gastric and intestinal organoids to the  
618 culture supernatant facilitates direct interaction of the organoids with microbes, as we showed  
619 here by infecting apical-out organoids with *S. Typhimurium*. Since this method does not require  
620 the use of specialist equipment to administer pathogens into a central organoid lumen, this  
621 makes modelling host-pathogen infections *in vitro* significantly more practical.

622 In summary, the results from this study demonstrate the ability to isolate stem cells  
623 from gastric glands and crypts of the sheep abomasum and intestine, respectively and show  
624 that they differentiate into tissue-specific organoids when grown under identical conditions.  
625 The robustness of both gastric and intestinal organoids from sheep was demonstrated by  
626 showing that tissue-specific gene expression is maintained across multiple passages. Finally,  
627 both gastric and intestinal sheep organoids can be invaded by important bacterial and parasitic  
628 pathogens and they therefore represent a useful tool for modelling host-pathogen interactions.

629

### 630 **5. Conflict of Interest**

631 The authors declare that the research was conducted in the absence of any commercial or  
632 financial relationships that could be construed as a potential conflict of interest.

633

### 634 **6. Author Contributions**

635 DS, DRGP, EAI and TMcN conceived the study. All authors designed the research. DS, DRGP,  
636 AB, KAH, MF, AFC and CC performed research. DS, DRGP and STGB analysed data. DS  
637 and DRGP wrote the paper with contributions from all authors. All authors read and approved  
638 the final manuscript.

639

### 640 **7. Data availability statement**

641 The datasets generated and analysed during the current study are fully compliant with the  
642 MINISEQE guidelines and are deposited in the publicly accessible NCBI Sequence Read  
643 Archive (SRA) Database under the project accession number PRJNA736945.

644

### 645 **8. Funding**

646 The work was supported in part by Moredun Foundation Research fellowships awarded to  
647 DRGP and DS. AB was supported by funding from the Moredun Innovation fund. KS, STGB,  
648 EAI, AJN and TMcN gratefully receive funding from the Scottish Government Rural and

## Running Title: Sheep gastric and intestinal organoids

649 Environment Science and Analytical Services (RESAS). KAH is supported by an Industrial  
650 Partnership PhD studentship funded by the University of Glasgow, Moredun Foundation and  
651 Pentlands Science Park, UK. MPS and CCU acknowledge funding from the Biotechnology &  
652 Biological Sciences Research Council via the Institute Strategic Programme on Control of  
653 Infectious Diseases (BB/P013740/1) and its constituent project BBS/E/D/20002173.

654

### 655 **9. Acknowledgements**

656 We would like to thank Leigh Andrews, Alison Morrison and Dave Bartley, Moredun Research  
657 Institute, UK, for their help and in the provision of parasite material and the Bioservices Unit,  
658 Moredun Research Institute, for expert care of the animals. We would also like to express our  
659 gratitude to Dr Prerna Vohra at the University of Edinburgh for their advice on the experimental  
660 infection of organoids with *S. Typhimurium* and for generation of the ST4/74 pFPV25.1 strain  
661 in a prior study.

662

### 663 **10. References**

- 664 Barker, N., Huch, M., Kujala, P., van de Wetering, M., Snippert, H. J., van Es, J. H., et al.  
665 (2010). Lgr5(+ve) stem cells drive self-renewal in the stomach and build long-lived  
666 gastric units in vitro. *Cell Stem Cell* 6, 25–36. doi:10.1016/j.stem.2009.11.013.
- 667 Barker, N., van Es, J. H., Kuipers, J., Kujala, P., van den Born, M., Cozijnsen, M., et al.  
668 (2007). Identification of stem cells in small intestine and colon by marker gene Lgr5.  
669 *Nature* 449, 1003–1007. doi:10.1038/nature06196.
- 670 Beaumont, M., Blanc, F., Cherbuy, C., Egidy, G., Giuffra, E., Lacroix-Lamandé, S., et al.  
671 (2021). Intestinal organoids in farm animals. *Veterinary Research* 52, 33.  
672 doi:10.1186/s13567-021-00909-x.
- 673 Bekelaar, K., Waghorn, T., Tavendale, M., McKenzie, C., and Leathwick, D. (2019).  
674 Abomasal nematode species differ in their in vitro response to exsheathment triggers.  
675 *Parasitol Res* 118, 707–710. doi:10.1007/s00436-018-6183-1.
- 676 Bray, N. L., Pimentel, H., Melsted, P., and Pachter, L. (2016). Near-optimal probabilistic  
677 RNA-seq quantification. *Nature Biotechnology* 34, 525–527. doi:10.1038/nbt.3519.
- 678 Clevers, H. (2016). Modeling Development and Disease with Organoids. *Cell* 165, 1586–  
679 1597. doi:10.1016/j.cell.2016.05.082.
- 680 Co, J. Y., Margalef-Català, M., Li, X., Mah, A. T., Kuo, C. J., Monack, D. M., et al. (2019).  
681 Controlling Epithelial Polarity: A Human Enteroid Model for Host-Pathogen  
682 Interactions. *Cell Reports* 26, 2509-2520.e4. doi:10.1016/j.celrep.2019.01.108.
- 683 Dinh, P. T. Y., Knoblauch, M., and Elling, A. A. (2014). Nondestructive Imaging of Plant-  
684 Parasitic Nematode Development and Host Response to Nematode Pathogenesis.  
685 *Phytopathology* 104, 497–506. doi:10.1094/PHYTO-08-13-0240-R.
- 686 Duque-Correa, M. A., Maizels, R. M., Grecis, R. K., and Berriman, M. (2020). Organoids –  
687 New Models for Host–Helminth Interactions. *Trends in Parasitology* 36, 170–181.  
688 doi:10.1016/j.pt.2019.10.013.
- 689 Eichenberger, R. M., Ryan, S., Jones, L., Buitrago, G., Polster, R., Montes de Oca, M., et al.  
690 (2018a). Hookworm Secreted Extracellular Vesicles Interact With Host Cells and

## Running Title: Sheep gastric and intestinal organoids

- 691 Prevent Inducible Colitis in Mice. *Front. Immunol.* 9.  
692 doi:10.3389/fimmu.2018.00850.
- 693 Eichenberger, R. M., Talukder, M. H., Field, M. A., Wangchuk, P., Giacomini, P., Loukas, A.,  
694 et al. (2018b). Characterization of *Trichuris muris* secreted proteins and extracellular  
695 vesicles provides new insights into host–parasite communication. *Journal of*  
696 *Extracellular Vesicles* 7, 1428004. doi:10.1080/20013078.2018.1428004.
- 697 Ellis, S., Matthews, J. B., Shaw, D. J., Paterson, S., McWilliam, H. E. G., Inglis, N. F., et al.  
698 (2014). Ovine IgA-reactive proteins from *Teladorsagia circumcincta* infective larvae.  
699 *Int J Parasitol* 44, 743–750. doi:10.1016/j.ijpara.2014.05.007.
- 700 Engevik, A. C., Kaji, I., and Goldenring, J. R. (2019). The Physiology of the Gastric Parietal  
701 Cell. *Physiological Reviews* 100, 573–602. doi:10.1152/physrev.00016.2019.
- 702 Finlay, B. B., and Falkow, S. (1990). Salmonella Interactions with Polarized Human  
703 Intestinal Caco-2 Epithelial Cells. *The Journal of Infectious Diseases* 162, 1096–  
704 1106. doi:10.1093/infdis/162.5.1096.
- 705 Gehart, H., van Es, J. H., Hamer, K., Beumer, J., Kretzschmar, K., Dekkers, J. F., et al.  
706 (2019). Identification of Enteroendocrine Regulators by Real-Time Single-Cell  
707 Differentiation Mapping. *Cell* 176, 1158–1173.e16. doi:10.1016/j.cell.2018.12.029.
- 708 Hamilton, C. A., Young, R., Jayaraman, S., Sehgal, A., Paxton, E., Thomson, S., et al.  
709 (2018). Development of in vitro enteroids derived from bovine small intestinal crypts.  
710 *Veterinary Research* 49, 54. doi:10.1186/s13567-018-0547-5.
- 711 Heredia, N., and García, S. (2018). Animals as sources of food-borne pathogens: A review.  
712 *Anim Nutr* 4, 250–255. doi:10.1016/j.aninu.2018.04.006.
- 713 Joshi, N. A., and Fass, J. N. (2011). Sickle: A sliding-window, adaptive, quality-based  
714 trimming tool for FastQ files (Version 1.33). Available at:  
715 <https://github.com/najoshi/sickle>.
- 716 Kar, S. K., Wells, J. M., Ellen, E. D., te Pas, M. F. W., Madsen, O., Groenen, M. A. M., et al.  
717 (2021). Organoids: a promising new in vitro platform in livestock and veterinary  
718 research. *Veterinary Research* 52, 43. doi:10.1186/s13567-021-00904-2.
- 719 Kulaksiz, H., Arnold, R., Göke, B., Maronde, E., Meyer, M., Fahrenholz, F., et al. (2000).  
720 Expression and cell-specific localization of the cholecystokinin B/gastrin receptor in  
721 the human stomach. *Cell Tissue Res* 299, 289–298.
- 722 Luo, X.-C., Chen, Z.-H., Xue, J.-B., Zhao, D.-X., Lu, C., Li, Y.-H., et al. (2019). Infection by  
723 the parasitic helminth *Trichinella spiralis* activates a Tas2r-mediated signaling  
724 pathway in intestinal tuft cells. *Proc Natl Acad Sci USA* 116, 5564–5569.  
725 doi:10.1073/pnas.1812901116.
- 726 Marini, F., and Binder, H. (2019). pcaExplorer: an R/Bioconductor package for interacting  
727 with RNA-seq principal components. *BMC Bioinformatics* 20, 331.  
728 doi:10.1186/s12859-019-2879-1.

## Running Title: Sheep gastric and intestinal organoids

- 729 Martin, M. (2011). Cutadapt removes adapter sequences from high-throughput sequencing  
730 reads. *EMBnet journal* 17, 10–12. doi:10.14806/ej.17.1.200.
- 731 McSorley, H. J., Hewitson, J. P., and Maizels, R. M. (2013). Immunomodulation by helminth  
732 parasites: defining mechanisms and mediators. *Int J Parasitol* 43, 301–310.  
733 doi:10.1016/j.ijpara.2012.11.011.
- 734 Meyerholz, D. K., Gallup, J. M., Grubor, B. M., Evans, R. B., Tack, B. F., McCray Jr, P. B.,  
735 et al. (2004). Developmental expression and distribution of sheep  $\beta$ -defensin-2.  
736 *Developmental & Comparative Immunology* 28, 171–178. doi:10.1016/S0145-  
737 305X(03)00105-8.
- 738 Mostofa, M., McKELLAR, Q. A., and Eckersall, P. D. (1990). Comparison of pepsinogen  
739 forms in cattle, sheep and goats. *Research in Veterinary Science* 48, 33–37.  
740 doi:10.1016/S0034-5288(18)31505-4.
- 741 Nieuwhof, G. J., and Bishop, S. C. (2005). Costs of the major endemic diseases of sheep in  
742 Great Britain and the potential benefits of reduction in disease impact. *Animal Science*  
743 81, 23–29. doi:10.1079/ASC41010023.
- 744 Nusse, Y. M., Savage, A. K., Marangoni, P., Rosendahl-Huber, A. K. M., Landman, T. A., de  
745 Sauvage, F. J., et al. (2018). Parasitic helminths induce fetal-like reversion in the  
746 intestinal stem cell niche. *Nature* 559, 109–113. doi:10.1038/s41586-018-0257-1.
- 747 Richardson, E. J., Limaye, B., Inamdar, H., Datta, A., Manjari, K. S., Pullinger, G. D., et al.  
748 (2011). Genome Sequences of Salmonella enterica Serovar Typhimurium,  
749 Choleraesuis, Dublin, and Gallinarum Strains of Well- Defined Virulence in Food-  
750 Producing Animals. *Journal of Bacteriology* 193, 3162–3163. doi:10.1128/JB.00394-  
751 11.
- 752 Roeber, F., Jex, A. R., and Gasser, R. B. (2013). Impact of gastrointestinal parasitic  
753 nematodes of sheep, and the role of advanced molecular tools for exploring  
754 epidemiology and drug resistance - an Australian perspective. *Parasites & Vectors* 6,  
755 153. doi:10.1186/1756-3305-6-153.
- 756 Sargison, N. D. (2020). The critical importance of planned small ruminant livestock health  
757 and production in addressing global challenges surrounding food production and  
758 poverty alleviation. *New Zealand Veterinary Journal* 68, 136–144.  
759 doi:10.1080/00480169.2020.1719373.
- 760 Sato, T., Vries, R. G., Snippert, H. J., van de Wetering, M., Barker, N., Stange, D. E., et al.  
761 (2009). Single Lgr5 stem cells build crypt-villus structures in vitro without a  
762 mesenchymal niche. *Nature* 459, 262–265. doi:10.1038/nature07935.
- 763 Schmitz, F., Göke, M. N., Otte, J.-M., Schrader, H., Reimann, B., Kruse, M.-L., et al. (2001).  
764 Cellular expression of CCK-A and CCK-B/gastrin receptors in human gastric mucosa.  
765 *Regulatory Peptides* 102, 101–110. doi:10.1016/S0167-0115(01)00307-X.
- 766 Stear, M. J., Bishop, S. C., Doligalska, M., Duncan, J. L., Holmes, P. H., Irvine, J., et al.  
767 (1995). Regulation of egg production, worm burden, worm length and worm



## Running Title: Sheep gastric and intestinal organoids

- 768 fecundity by host responses in sheep infected with *Ostertagia circumcincta*. *Parasite*  
769 *Immunol* 17, 643–652. doi:10.1111/j.1365-3024.1995.tb01010.x.
- 770 Stear, M. J., Bishop, S. C., Henderson, N. G., and Scott, I. (2003). A key mechanism of  
771 pathogenesis in sheep infected with the nematode *Teladorsagia circumcincta*. *Anim*  
772 *Health Res Rev* 4, 45–52. doi:10.1079/ahrr200351.
- 773 Stevens, C. E., and Hume, I. D. (1998). Contributions of Microbes in Vertebrate  
774 Gastrointestinal Tract to Production and Conservation of Nutrients. *Physiological*  
775 *Reviews* 78, 393–427. doi:10.1152/physrev.1998.78.2.393.
- 776 Uzzau, S., Leori, G. S., Petrucci, V., Watson, P. R., Schianchi, G., Bacciu, D., et al. (2001).  
777 *Salmonella enterica* Serovar-Host Specificity Does Not Correlate with the Magnitude  
778 of Intestinal Invasion in Sheep. *Infection and Immunity* 69, 3092–3099.  
779 doi:10.1128/IAI.69.5.3092-3099.2001.
- 780 Valdivia, R. H., and Falkow, S. (1996). Bacterial genetics by flow cytometry: rapid isolation  
781 of *Salmonella typhimurium* acid-inducible promoters by differential fluorescence  
782 induction. *Molecular Microbiology* 22, 367–378. doi:10.1046/j.1365-  
783 2958.1996.00120.x.
- 784 Vohra, P., Vrettou, C., Hope, J. C., Hopkins, J., and Stevens, M. P. (2019). Nature and  
785 consequences of interactions between *Salmonella enterica* serovar Dublin and host  
786 cells in cattle. *Veterinary Research* 50, 99. doi:10.1186/s13567-019-0720-5.
- 787 Xiao, S., and Zhou, L. (2020). Gastric Stem Cells: Physiological and Pathological  
788 Perspectives. *Front. Cell Dev. Biol.* 8. doi:10.3389/fcell.2020.571536.

789

### 790 **11. Figure Legends**

791

792 **Figure 1.** A schematic of the development of ovine gastric and intestinal organoids for studying  
793 host-pathogen interactions. Stem cells isolated from sheep ileum crypts and abomasum gastric  
794 glands can be cultivated into tissue-specific organoids when grown in a three-dimensional  
795 culture system. Gastric and intestinal organoids can be co-cultured with pathogens to model  
796 host-parasite interactions in physiologically and biologically-relevant *in vitro* culture systems.  
797 Created with [BioRender.com](https://www.biorender.com).

798

799 **Figure 2.** *In vitro* growth of ovine abomasum and ileum organoids. (A) Representative images  
800 of abomasum and ileum organoids grown over 14 days in the same culture conditions. (B)  
801 Representative images showing the growth and development of mature abomasum and ileum  
802 organoids across multiple consecutive passages (P1 - P5). (C) Representative images of  
803 abomasum and ileum organoids grown for seven days, both pre-cryopreservation and after  
804 resuscitation. Scale bars = 10 µm.

805

806 **Figure 3.** Characterisation of ovine abomasum organoids by immunofluorescence confocal  
807 microscopy. (A) Representative Z-stack images of an individual abomasum organoid with a  
808 closed luminal space and an internal F-actin-expressing brush border. Red = F-actin and blue  
809 = Hoechst (nuclei). (B) Representative images of abomasum organoids probed for either the  
810 cell proliferation marker Ki67, or the epithelial cell markers EpCAM, villin and pan-  
811 cytokeratin (all green). F-actin (red) and Hoechst (blue). Scale bars = 10 µm.

## Running Title: Sheep gastric and intestinal organoids

812

813 **Figure 4.** Characterisation of ovine ileum organoids by immunofluorescence confocal  
814 microscopy. (A) Representative Z-stack images of part of an individual branched ileum  
815 organoid with a closed luminal space and an internal F-actin-expressing brush border. Red =  
816 F-actin and blue = Hoechst (nuclei). (B) Representative images of abomasum organoids probed  
817 for either the cell proliferation marker Ki67, or the epithelial cell markers EpCAM, villin and  
818 pan-cytokeratin (all green). F-actin (red) and Hoechst (blue). Scale bars = 10  $\mu$ m.

819

820 **Figure 5.** Principal component analysis (PCA) of RNA-seq expression of the top 500 most  
821 variant genes (of genes ranked by inter-sample variance) in ovine abomasum and ileum  
822 organoid and tissue samples. Sample type is indicated in the key and includes: abomasum  
823 organoid (red); abomasum tissue (green); ileum organoid (blue); ileum tissue (purple). Ellipses  
824 indicates 95% confidence intervals for each cluster.

825

826 **Figure 6.** Heat map showing expression level of top 40 most variant genes (of genes ranked  
827 by inter-sample variance) from ileum (ile) and abomasum (abo) organoids from serial passages  
828 (P0 – P4) and ileum (ile) and abomasum (abo) tissue derived from five lambs (T1 – T5).  
829 Colours indicate level of expression from low (blue) to high (red). The dendrograms indicate  
830 similarity between samples. Details of genes included in the heat map, including ENSOART  
831 sequence identifiers, are shown in Supplemental File 1.

832

833 **Figure 7.** Heat map showing the expression of genes associated with gastrointestinal epithelia  
834 in abomasum and ileum tissue and organoids. RNA-seq analysis was performed to compare  
835 gene expression in abomasal and ileal tissue derived from five lambs and abomasum and ileum  
836 organoids across multiple passages. Squares from left to right under “abomasum tissue” and  
837 “ileum tissue” represent lambs T1-T5. Squares from left to right under abomasum organoids  
838 and ileum organoids represent passages P0-P4. Scale =  $\log_2$  transcripts per million reads. Ee:  
839 enteroendocrine. Details of genes included in the heat map, including ENSOART sequence  
840 identifiers, are shown in Supplemental File 2.

841

842 **Figure 8.** Heat map showing the expression of genes associated with gastric epithelia in  
843 abomasum and ileum tissue and organoids. RNA-seq analysis was performed to compare gene  
844 expression in abomasal and ileal tissue derived from five lambs and abomasum and ileum  
845 organoids across multiple passages. Squares from left to right under “abomasum tissue” and  
846 “ileum tissue” represent lambs T1-T5. Squares from left to right under abomasum organoids  
847 and ileum organoids represent passages P0-P4. Scale =  $\log_2$  transcripts per million reads.  
848 Details of genes included in the heat map, including ENSOART sequence identifiers, are  
849 shown in Supplemental File 2.

850

851 **Figure 9.** Ovine gastric and intestinal organoids modelling a helminth infection. (A)  
852 Representative images of ovine abomasum and ileum organoids challenged with the helminth  
853 parasite *Teladorsagia circumcincta*. Following 24 hours of co-culture, L3 stage *T.*  
854 *circumcincta* (red) are visible within the lumen of abomasum and ileum organoids. (B)  
855 Representative images of individual ileum organoids presenting an enlarged lumen containing  
856 multiple worms (red). (C) Representative Z-stack images showing L3 stage *T. circumcincta*  
857 (red) migrating through the epithelial layer in abomasum and ileum organoids. F-actin (green)  
858 and Hoescht (blue). Scale bars = 10  $\mu$ m.

859

860 **Figure 10.** Reverse polarisation of ovine gastric and intestinal organoids for modelling host-  
861 pathogen interactions across the apical surface. Basal-out and apical-out abomasum (A) and

## Running Title: Sheep gastric and intestinal organoids

862 ileum (B) organoids imaged by differential interference contrast (top) and confocal  
863 immunofluorescence microscopy (bottom). White arrows indicate the F-actin-expressing brush  
864 border associated with the apical surface of the epithelia. Yellow arrow in the inset panel  
865 indicates microvilli at the externally located brush border in apical-out organoids. (C) Cross  
866 sections of apical-out abomasum and ileum organoids imaged by confocal microscopy. GFP-  
867 expressing *Salmonella enterica* Typhimrium (green), indicated by white arrows, are detectable  
868 on the surface of and within epithelial cells. F-actin (red) and Hoechst (blue). Scale bars = 10  
869  $\mu\text{m}$ .

870

871 **Supplemental Figure 1.** Negative controls for immunofluorescence antibody labelling in  
872 abomasum organoids. Representative confocal microscopy images of abomasum organoids  
873 probed with non-specific host IgG followed by indirect Alexa Fluor<sup>®</sup> 488-conjugated  
874 secondary antibody labelling. Marker name in green brackets indicates the antibody labelling  
875 control each organoid image represents. Scale bars = 10  $\mu\text{m}$ .

876

877 **Supplemental Figure 2.** Negative controls for immunofluorescence antibody labelling in  
878 intestinal organoids. Representative confocal microscopy images of ileum organoids probed  
879 with non-specific host IgG followed by indirect Alexa Fluor<sup>®</sup> 488-conjugated secondary  
880 antibody labelling. Marker name in green brackets indicates the antibody labelling control each  
881 organoid image represents. Hoescht, blue. Scale bars = 10  $\mu\text{m}$ .

882

883 **Supplemental Figure 3.** Heat map showing the expression of cell junction-related genes in  
884 abomasum and ileum tissue and organoids. RNA-seq analysis was performed to compare gene  
885 expression in abomasal and ileal tissue derived from five lambs and abomasum and ileum  
886 organoids across multiple passages. Squares from left to right under “abomasum tissue” and  
887 “ileum tissue” represent lambs T1-T5. Squares from left to right under abomasum organoids  
888 and ileum organoids represent passages P0-P4. Scale =  $\log_2$  transcripts per million reads.  
889 Details of genes included in the heat map, including ENSOART sequence identifiers, are  
890 shown in Supplemental File 2.

891

892 **Supplemental Figure 4.** Heat map showing the detection of immune-related gene expression  
893 in abomasum and ileum tissue and organoids. RNA-seq analysis was performed to compare  
894 gene expression in abomasal and ileal tissue derived from five lambs and abomasum and ileum  
895 organoids across multiple passages. Squares from left to right under “abomasum tissue” and  
896 “ileum tissue” represent lambs T1-T5. Squares from left to right under abomasum organoids  
897 and ileum organoids represent passages P0-P4. Scale =  $\log_2$  transcripts per million reads. TLRs:  
898 toll-like receptors. CLR: C-type lectin receptors. Details of genes included in the heat map,  
899 including ENSOART sequence identifiers, are shown in Supplemental File 2.

900

901

902

903

904

905

906

907

908

909

910

911

## Running Title: Sheep gastric and intestinal organoids

912 **Figure 1**  
913

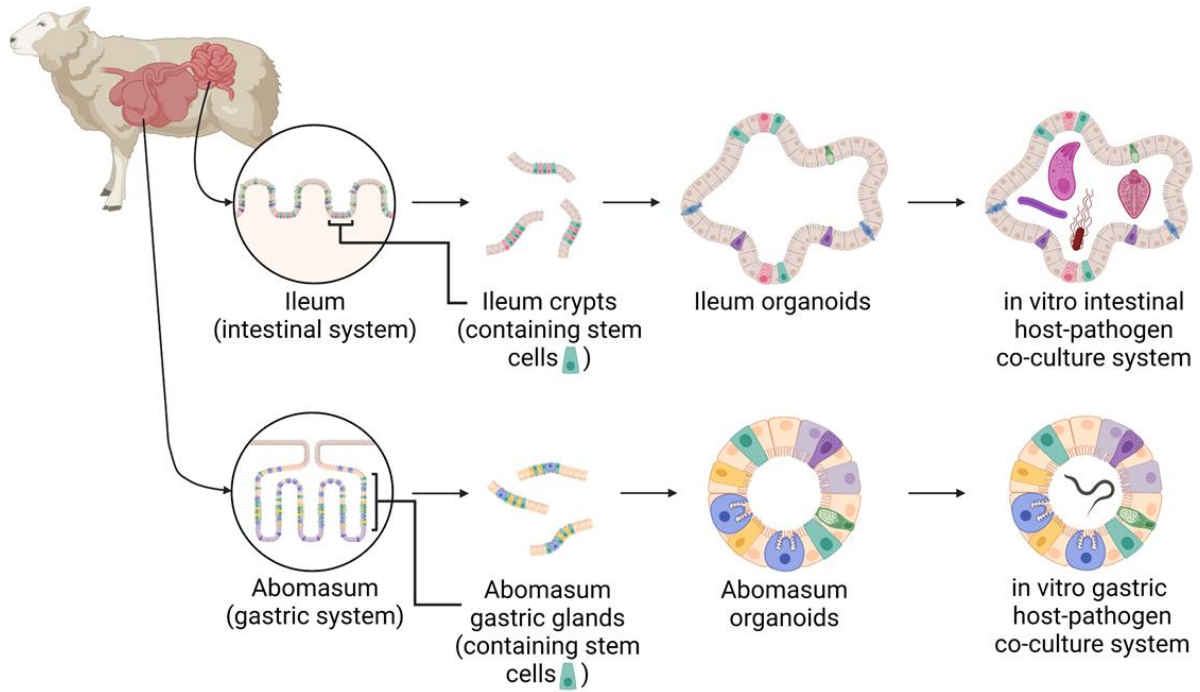

914  
915  
916  
917  
918  
919  
920  
921  
922  
923  
924  
925  
926  
927  
928  
929  
930  
931  
932  
933  
934  
935  
936  
937  
938  
939  
940  
941  
942  
943



**Running Title: Sheep gastric and intestinal organoids**

944 **Figure 2**  
945

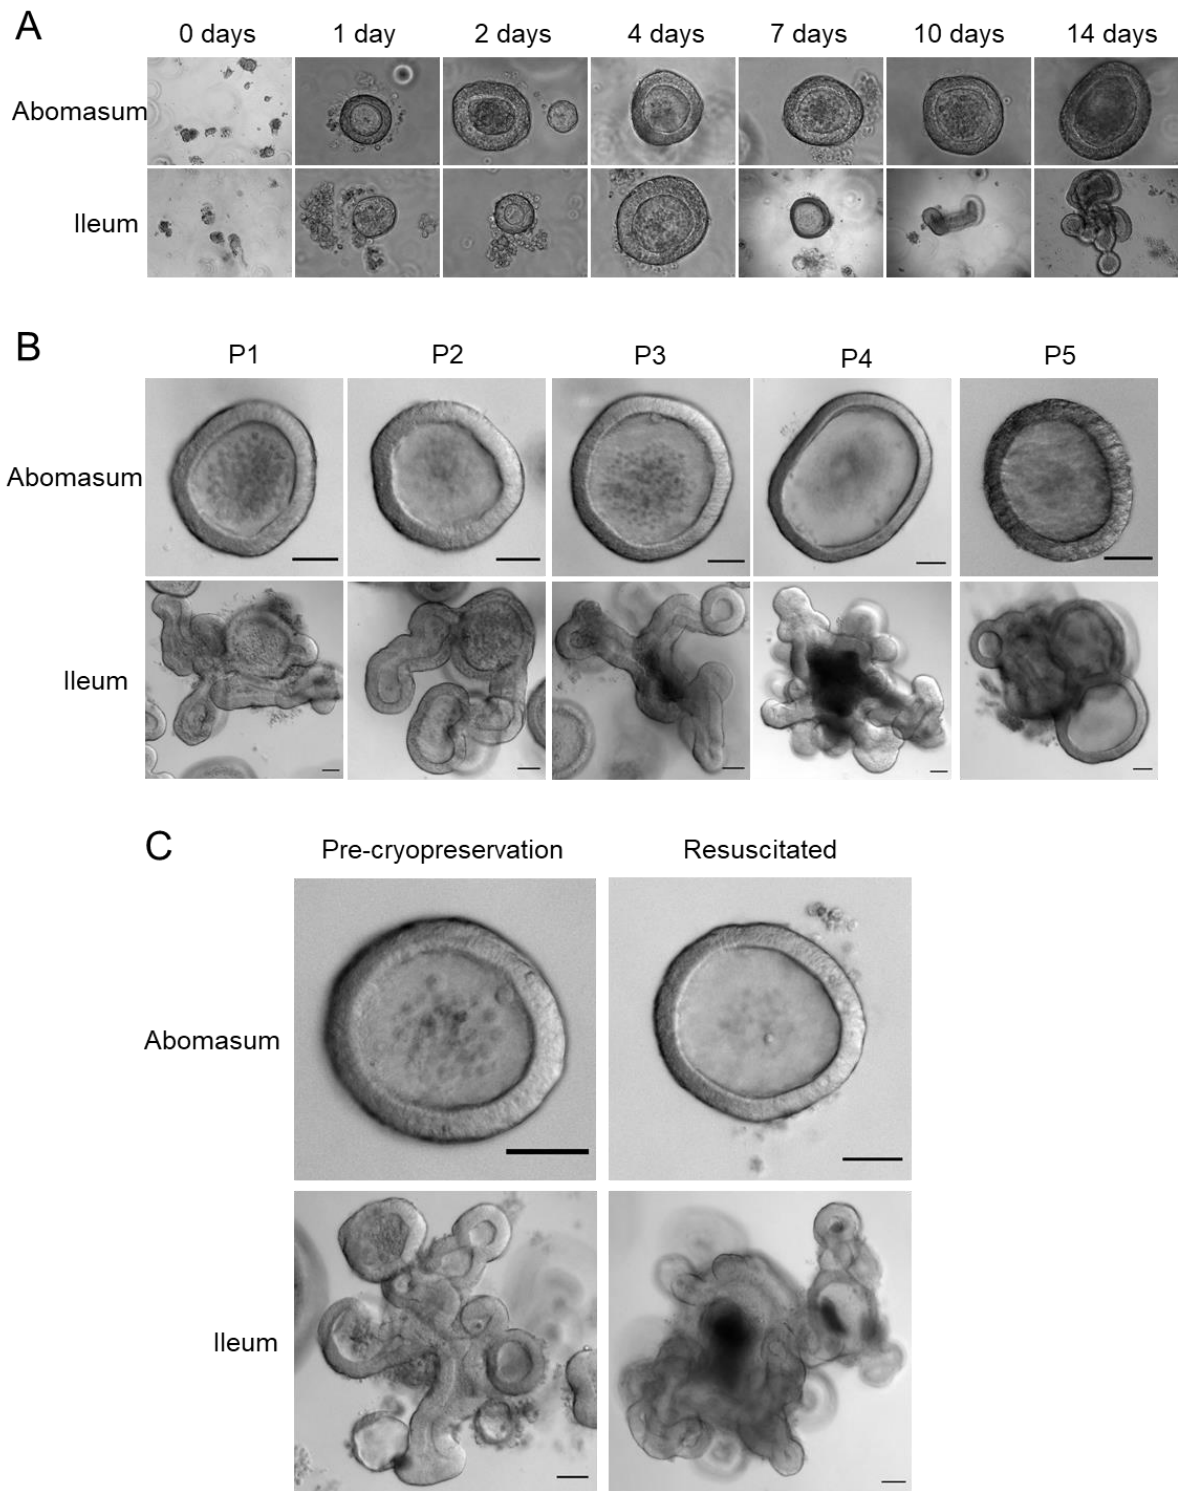

946  
947  
948  
949  
950  
951  
952  
953

Running Title: Sheep gastric and intestinal organoids

954 **Figure 3**  
955

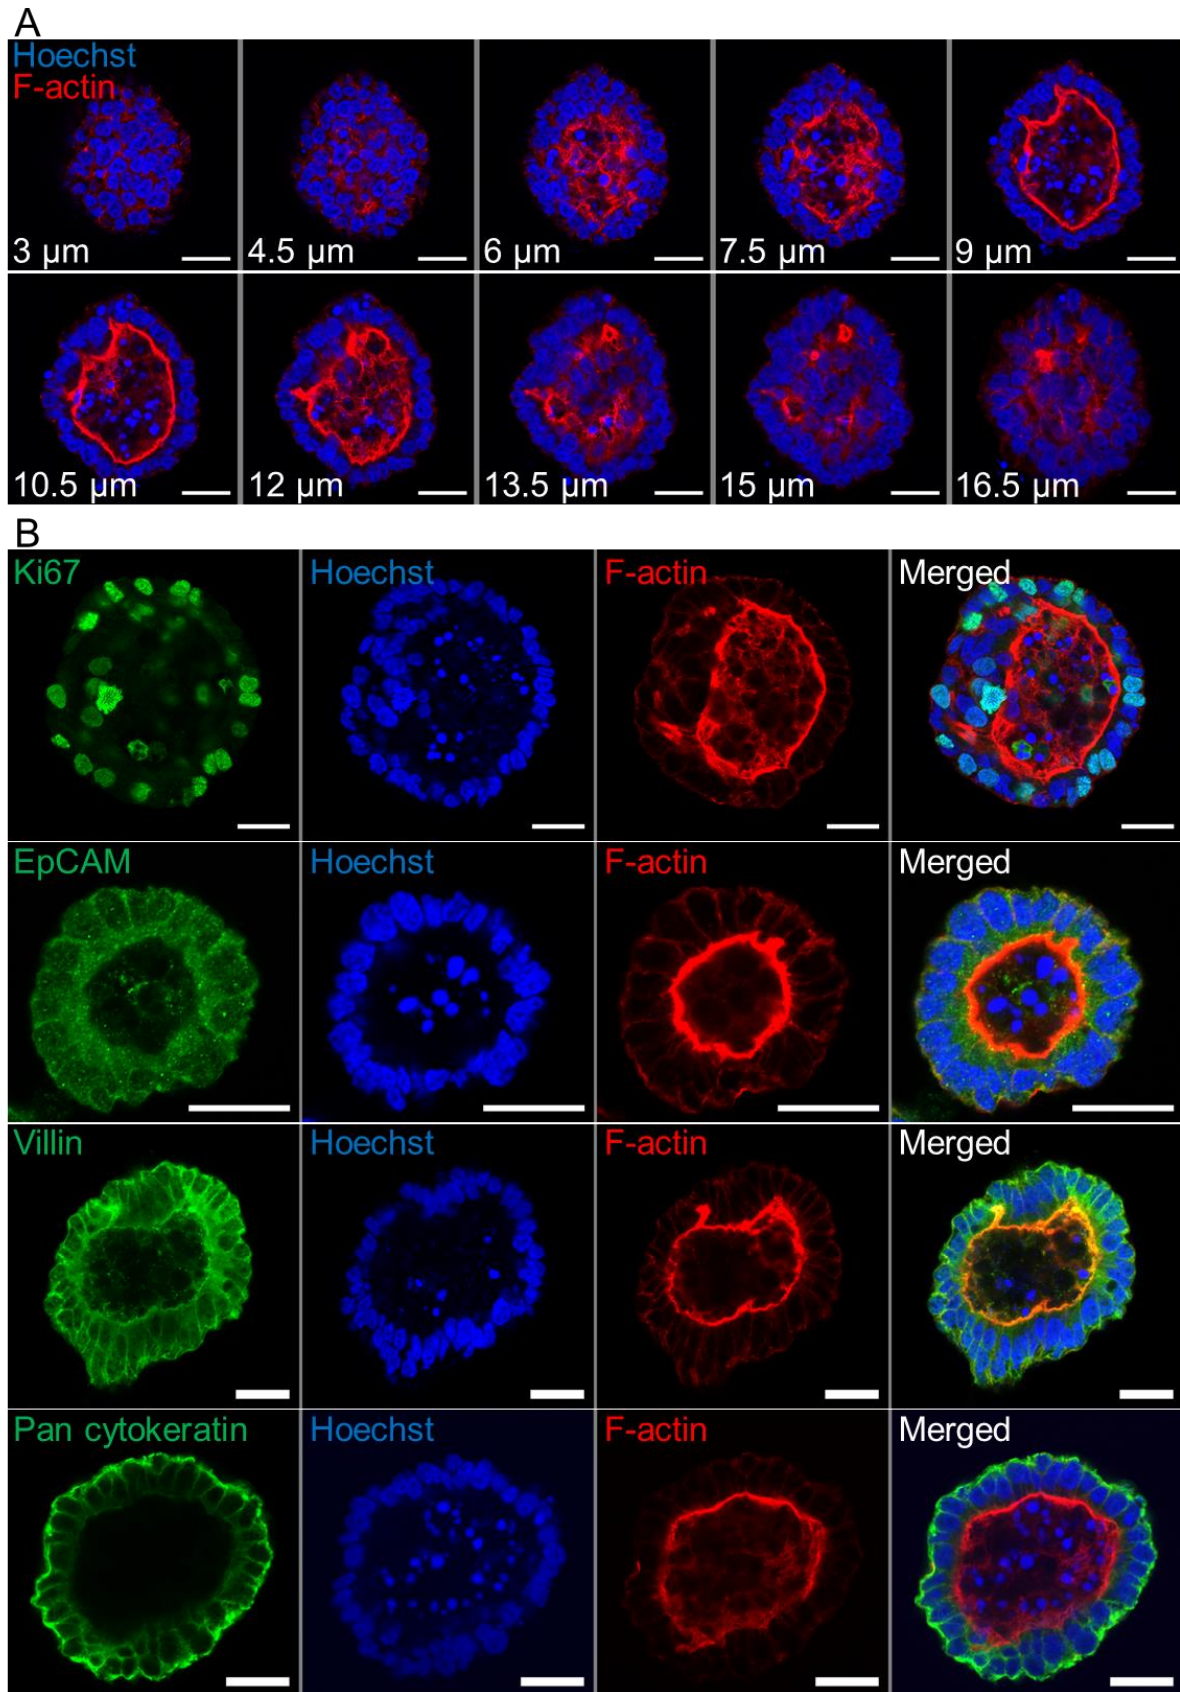

956  
957



Running Title: Sheep gastric and intestinal organoids

958 **Figure 4**  
959

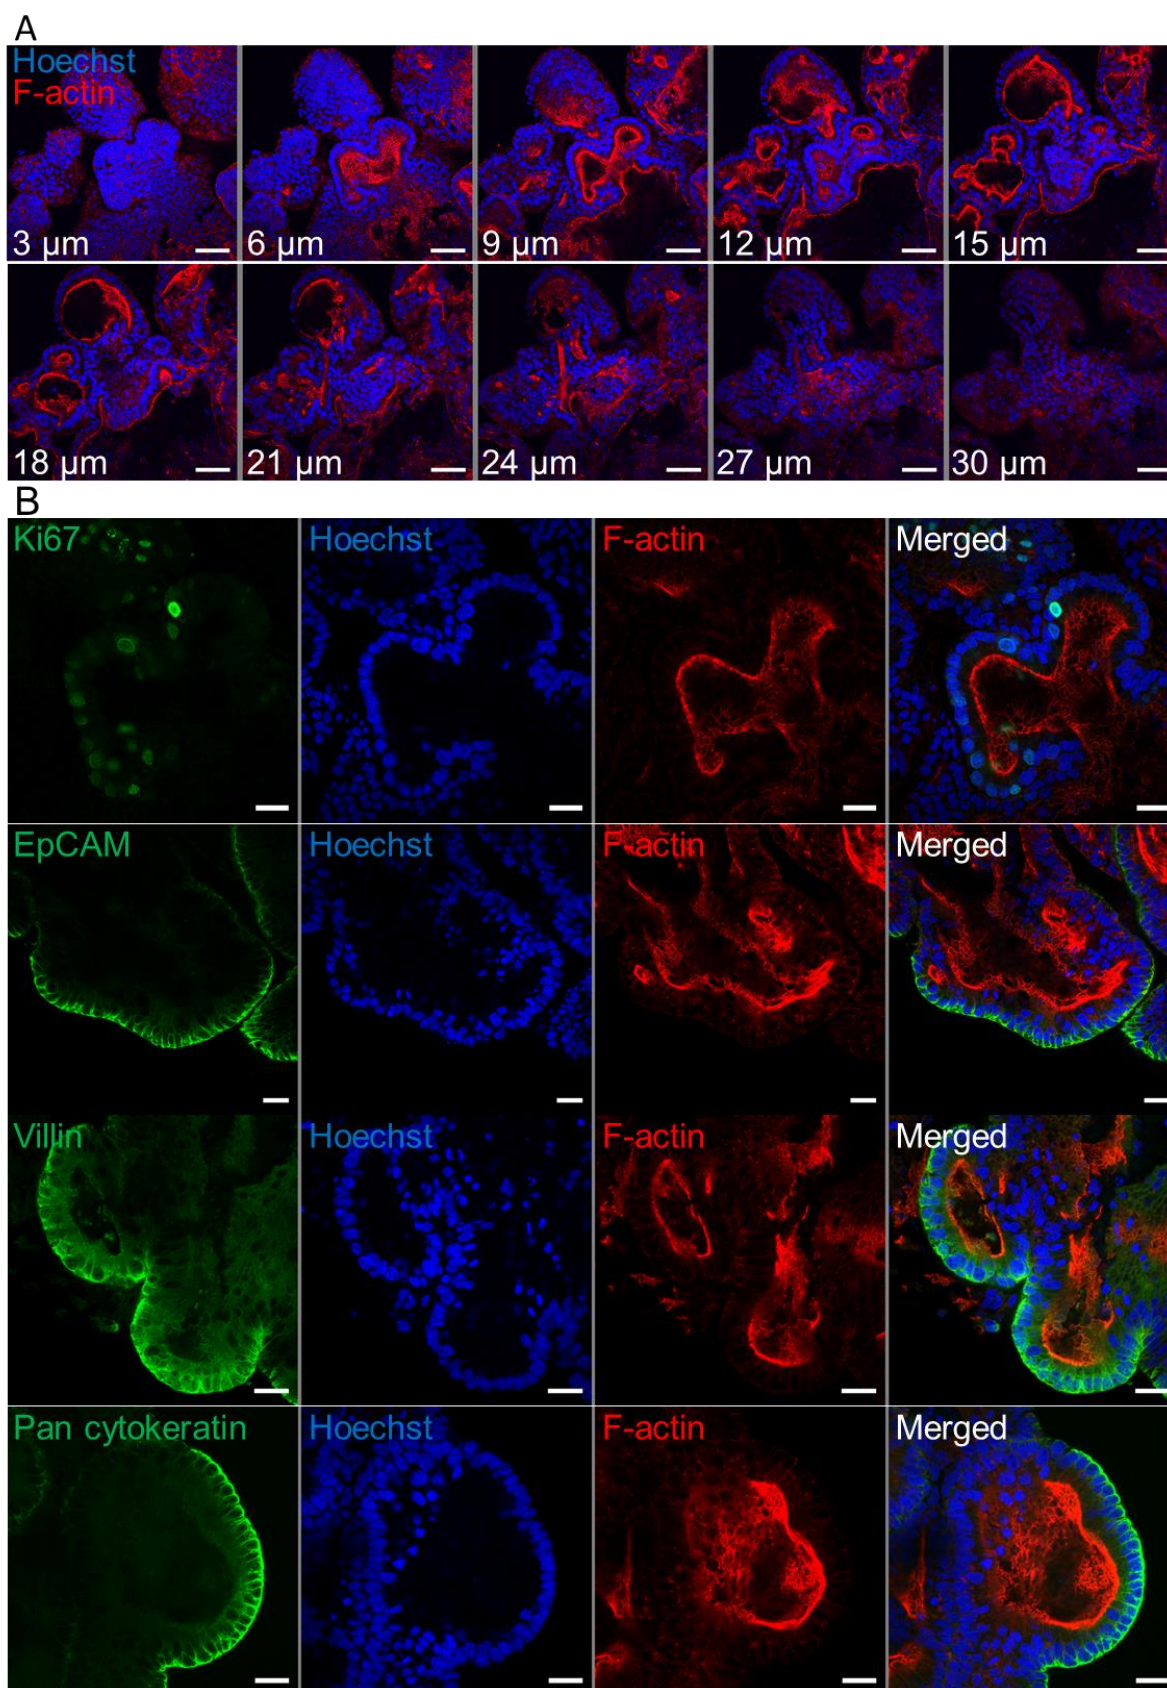

960  
961

### Running Title: Sheep gastric and intestinal organoids

962 **Figure 5**  
963

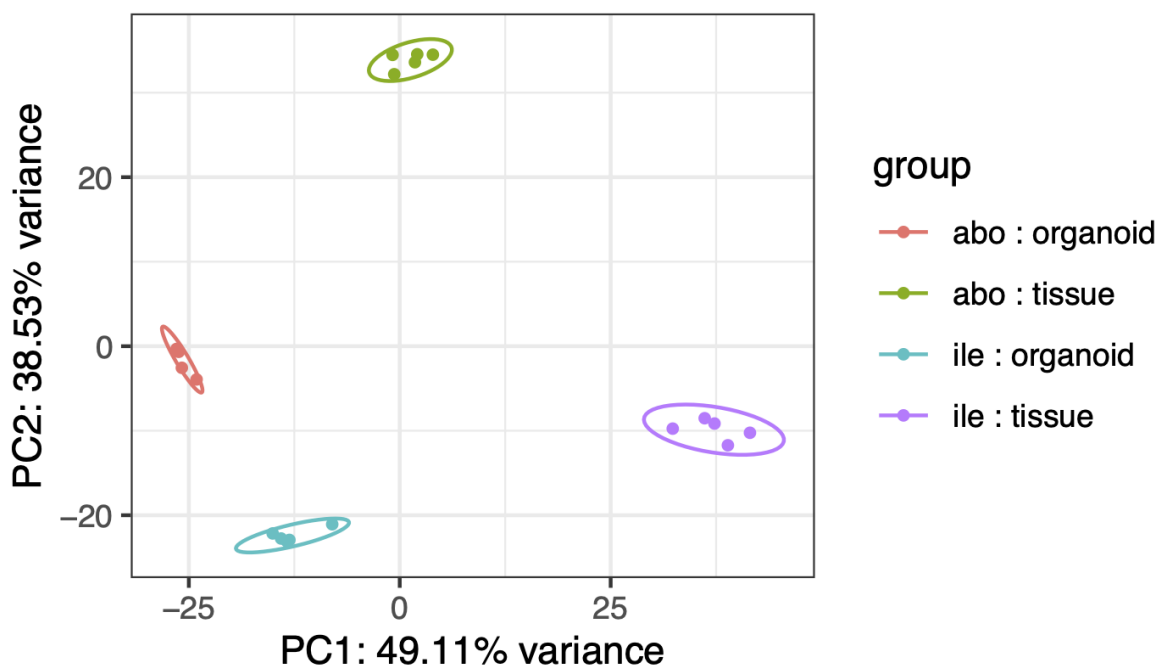

964  
965  
966  
967  
968  
969  
970  
971  
972  
973  
974  
975  
976  
977  
978  
979  
980  
981  
982  
983  
984  
985  
986  
987  
988  
989  
990  
991



Running Title: Sheep gastric and intestinal organoids

992 **Figure 6**  
993

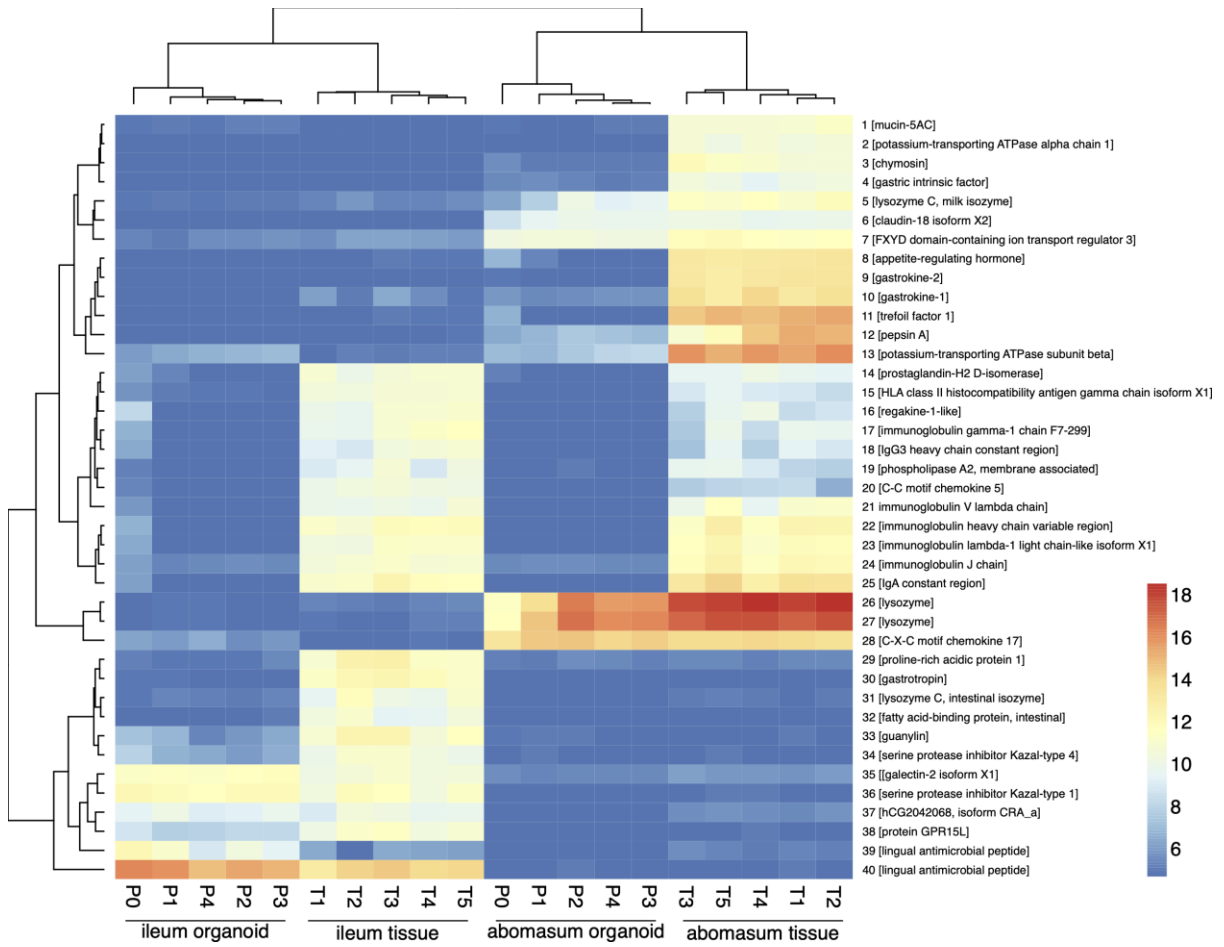

994  
995  
996  
997  
998  
999  
1000  
1001  
1002  
1003  
1004  
1005  
1006  
1007  
1008  
1009  
1010  
1011  
1012  
1013  
1014  
1015  
1016

Running Title: Sheep gastric and intestinal organoids

1017 **Figure 7**  
1018

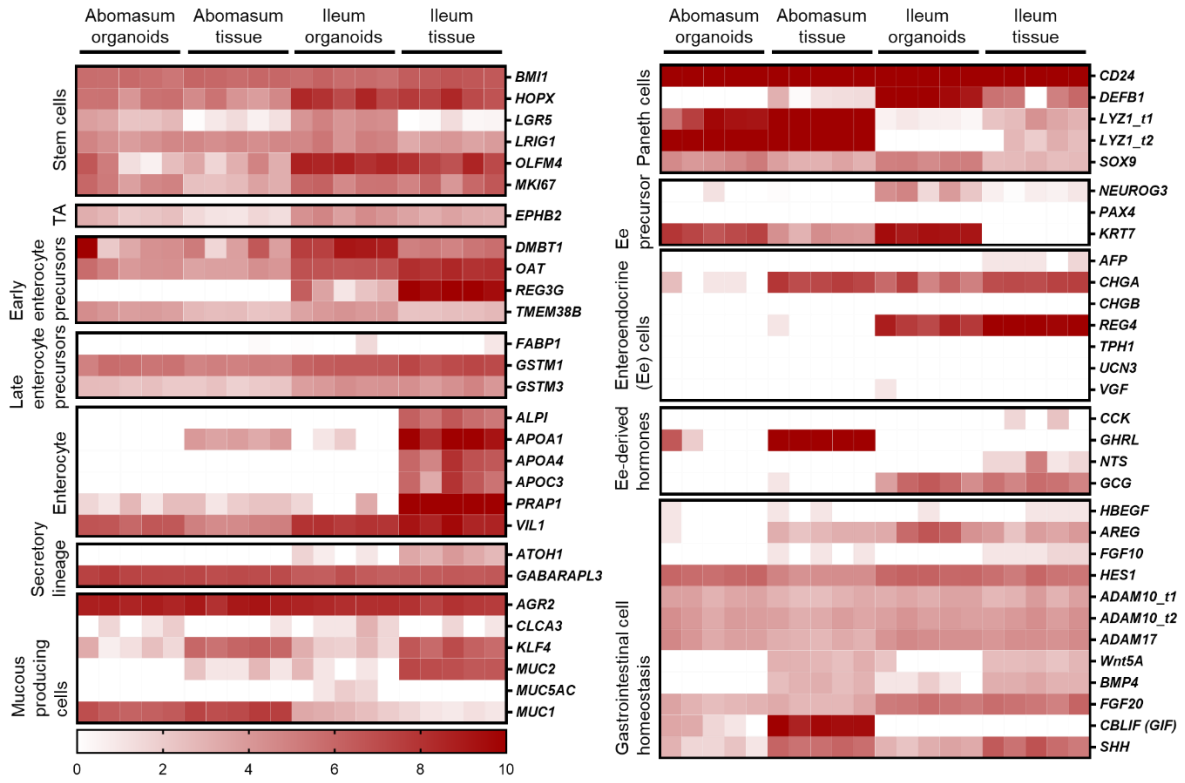

1019  
1020  
1021  
1022  
1023  
1024  
1025  
1026  
1027  
1028  
1029  
1030  
1031  
1032  
1033  
1034  
1035  
1036  
1037  
1038  
1039  
1040  
1041  
1042  
1043  
1044  
1045

## Running Title: Sheep gastric and intestinal organoids

1046 **Figure 8**  
1047

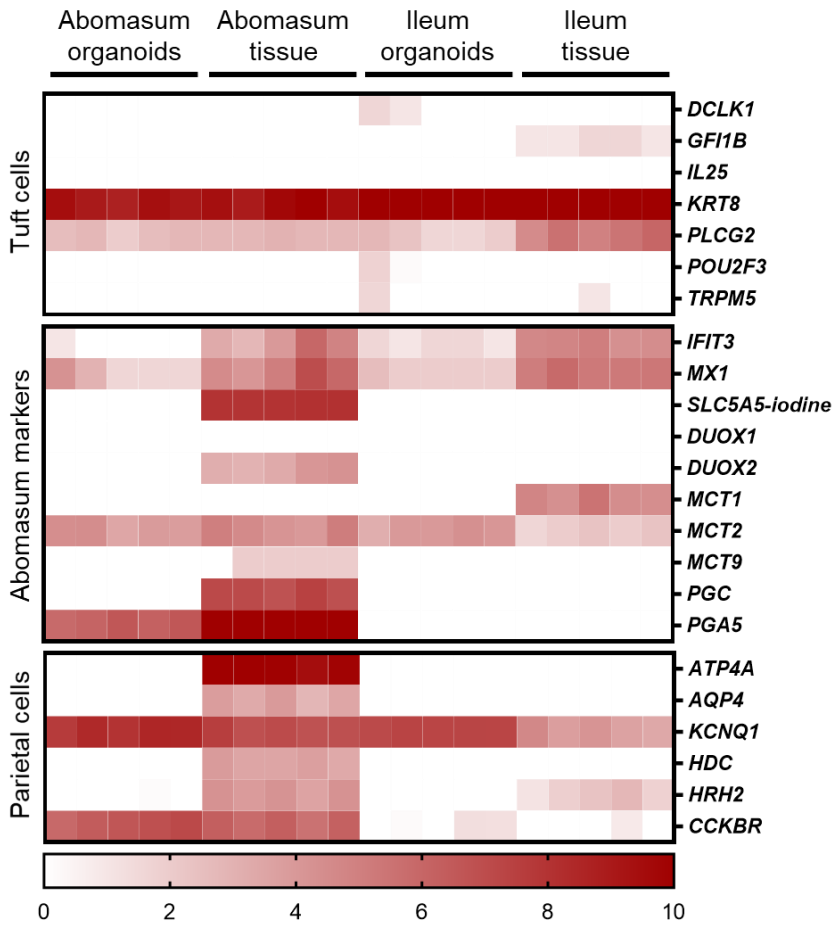

1048  
1049  
1050  
1051  
1052  
1053  
1054  
1055  
1056  
1057  
1058  
1059  
1060  
1061  
1062  
1063  
1064  
1065  
1066  
1067  
1068  
1069  
1070

Running Title: Sheep gastric and intestinal organoids

1071 **Figure 9**  
1072

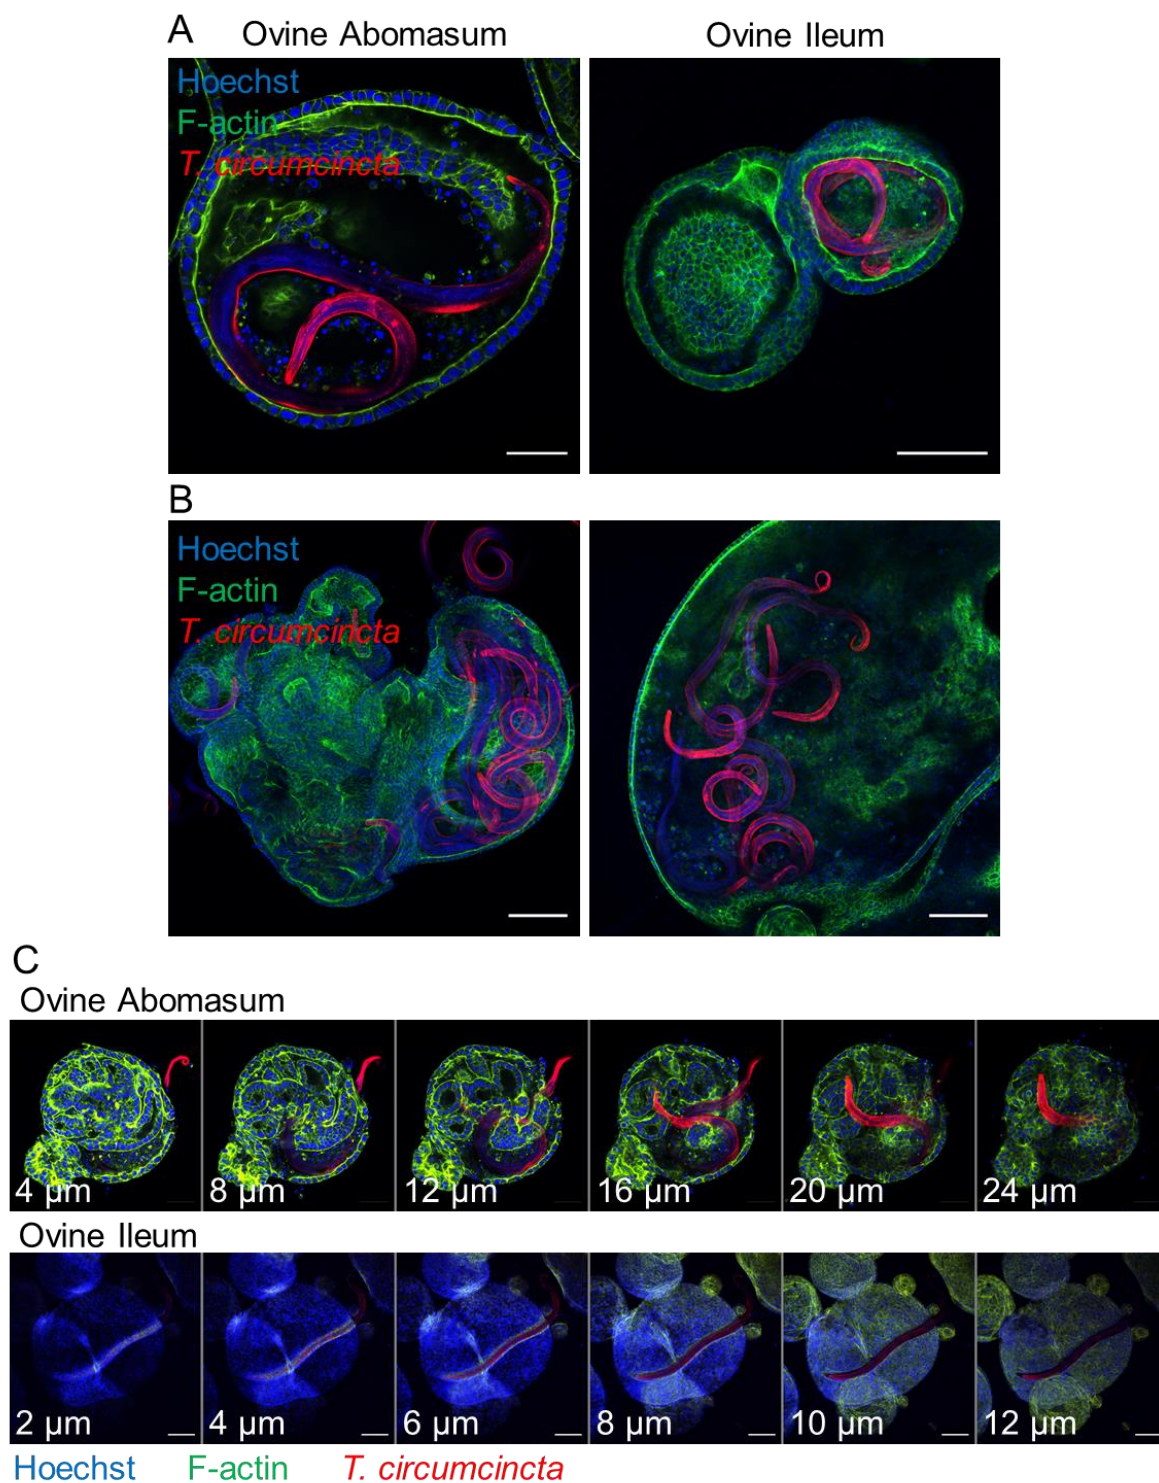

1073  
1074  
1075  
1076  
1077  
1078  
1079  
1080



## Running Title: Sheep gastric and intestinal organoids

1081 **Figure 10**  
1082

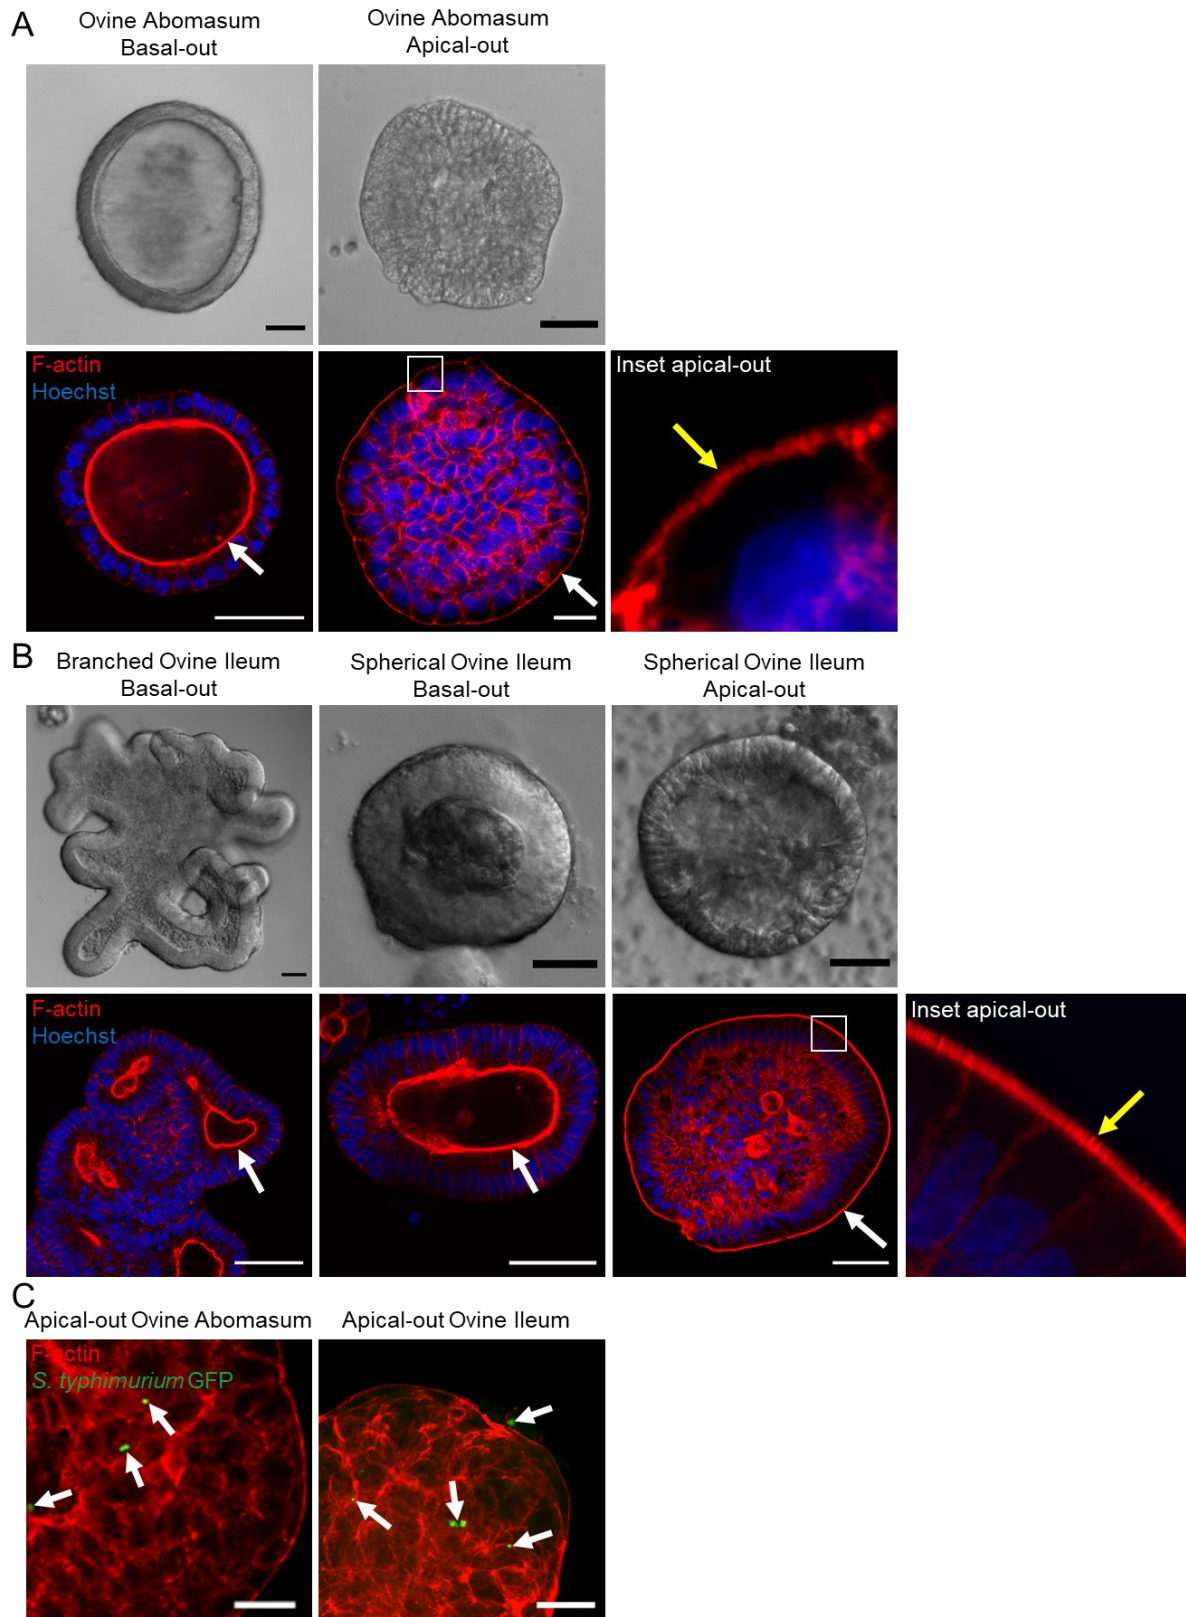

1083  
1084  
1085  
1086  
1087

**Running Title: Sheep gastric and intestinal organoids**

1088 **Supplemental Figure 1**

1089

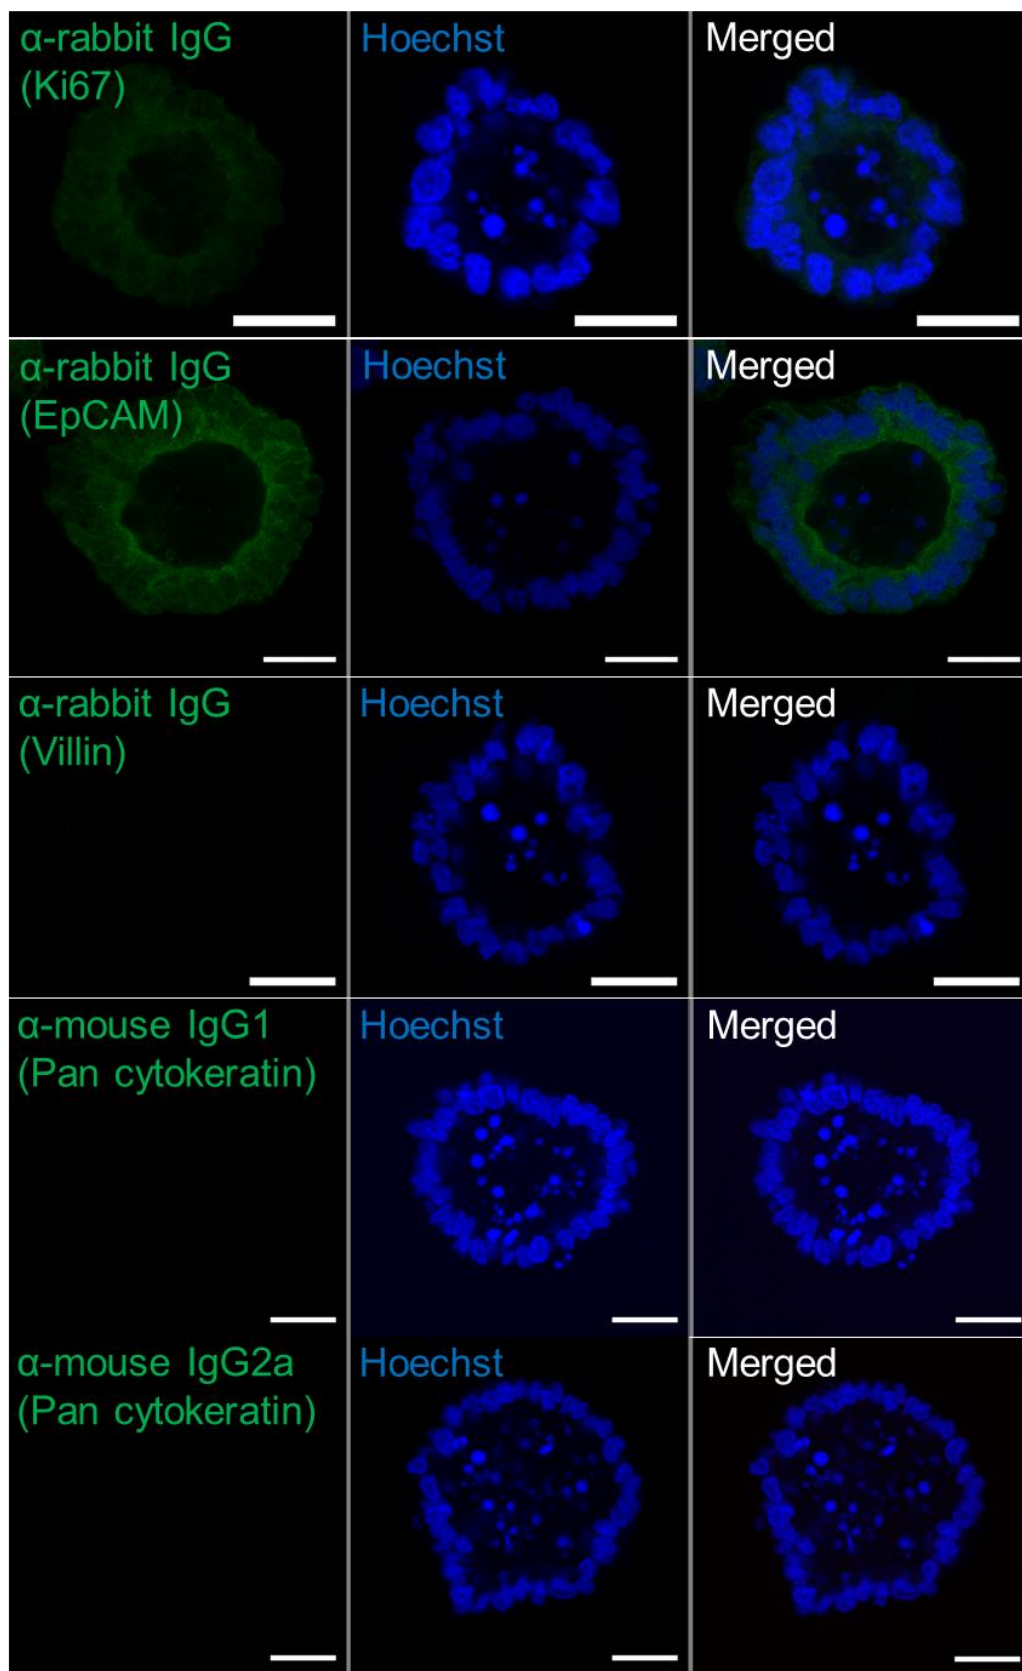

1090

1091

1092

Running Title: Sheep gastric and intestinal organoids

1093 **Supplementary Figure 2**

1094

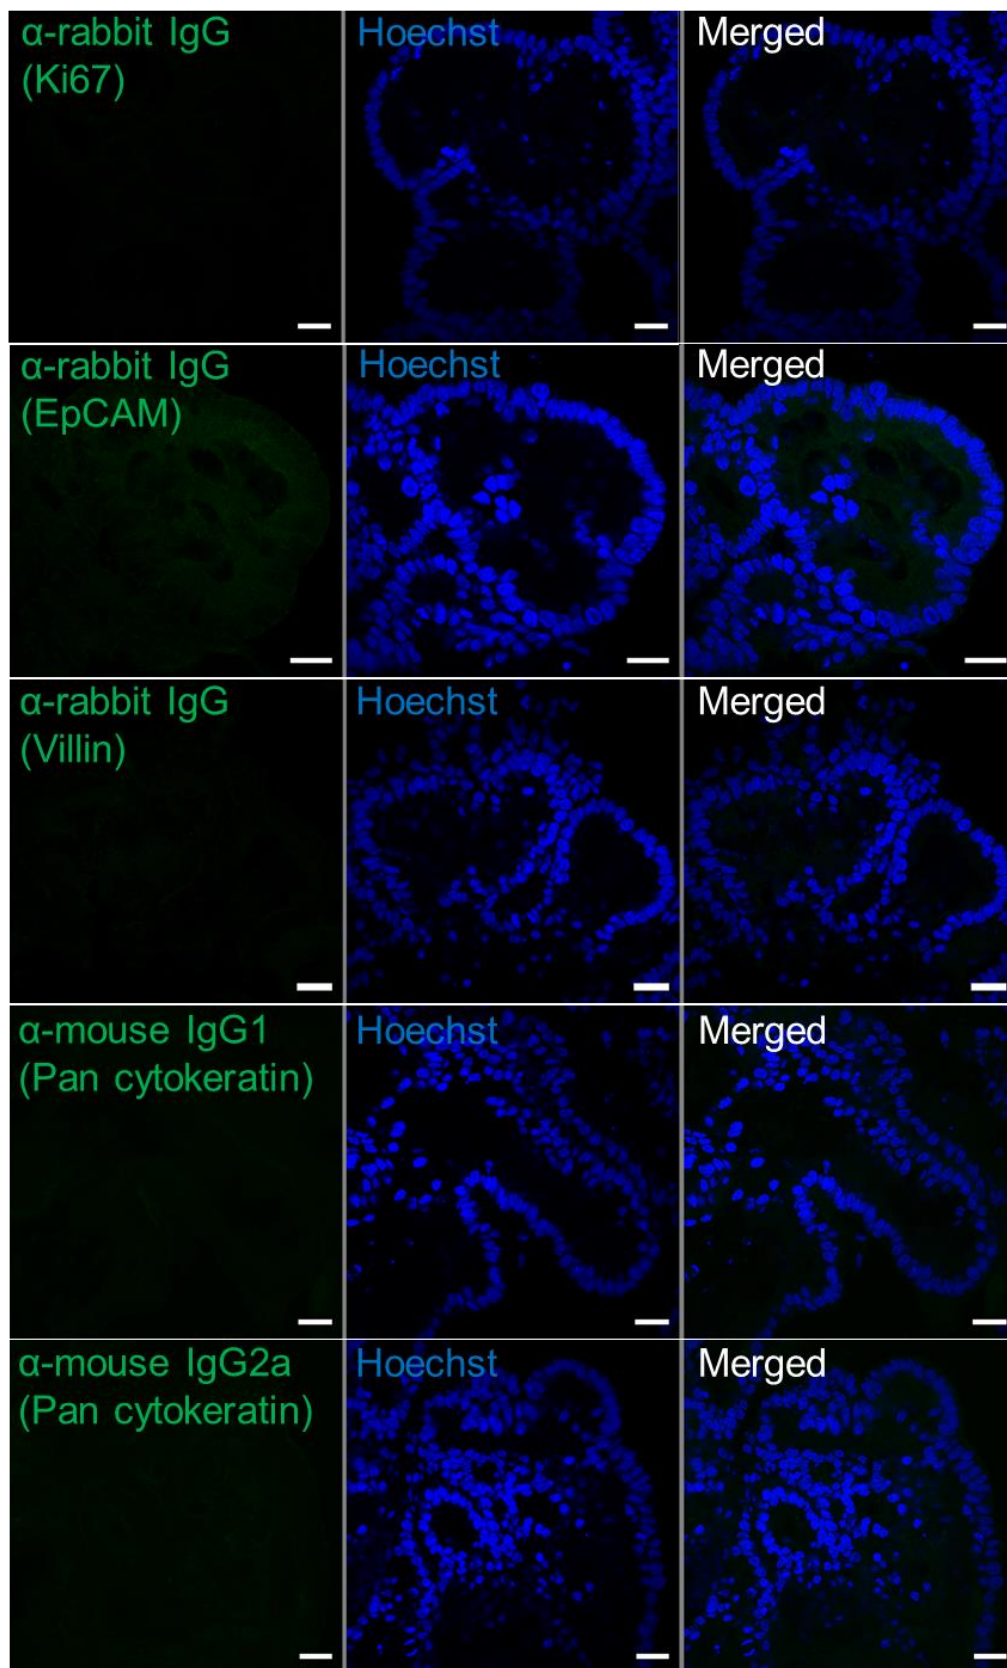

1095

1096

1097

Running Title: Sheep gastric and intestinal organoids

1098 **Supplementary Figure 3**

1099

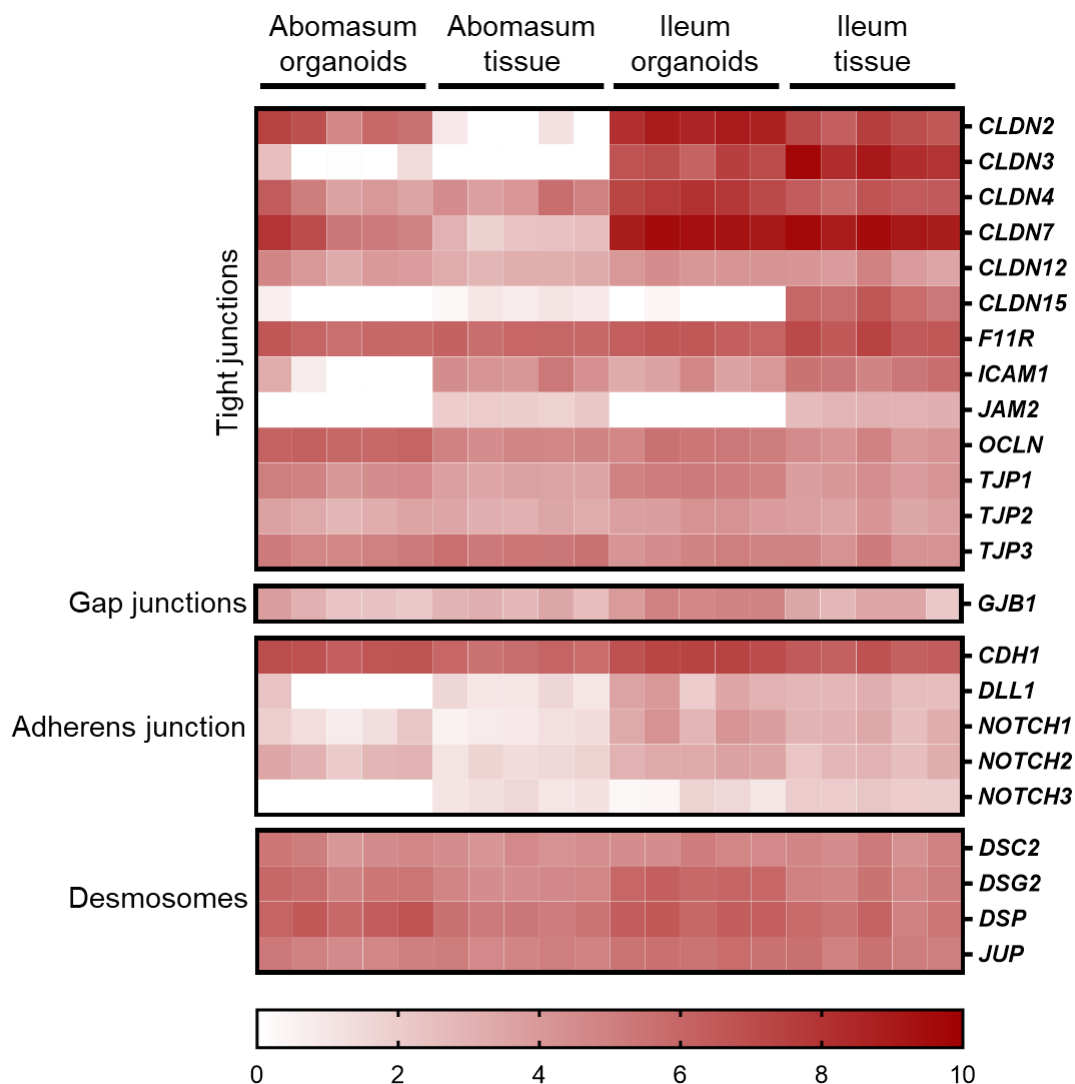

1100

1101

1102

1103

1104

1105

1106

1107

1108

1109

1110

1111

1112

1113

1114

1115

1116

1117

1118



## Running Title: Sheep gastric and intestinal organoids

### 1119 Supplementary Figure 4

1120

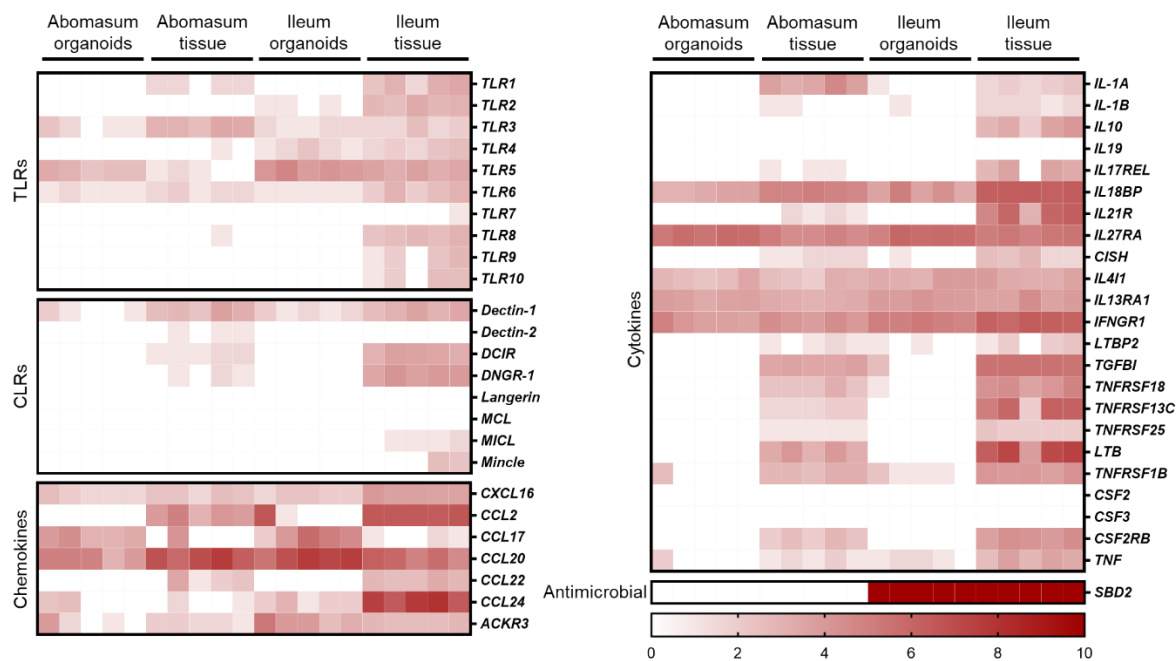

1121
