# Supplementary material for: The development of ovine gastric and intestinal organoids for studying ruminant host-pathogen interactions
Source: bioRxiv preprint, doi:10.1101/2021.06.30.450542, version 1 (2021-06-30)
Supplement: Supplemental File 2 [file 450542_file04.xlsx]

## Sheet: TPM counts for heat maps
		Abomasum organoids					Ileum organoids					Abomasum tissue					Ileum tissue
Gene name	GeneID	P0	P1	P2	P3	P4	P0	P1	P2	P3	P4	T1	T2	T3	T4	T5	T1	T2	T3	T4	T5
CLDN2	ENSOART00000020544	171.515	116.293	25.9976	58.91	46.8402	281.776	488.754	375.975	466.64	420.065	1.84521	0.267653	0.163962	2.31861	0.330655	138.052	76.8889	187.135	123.766	88.9267
CLDN3	ENSOART00000011794	5.60125	0.93866	1.05119	0.896295	2.67895	105.106	126.03	68.0222	182.734	134.643	0.615564	0.110505	0.613707	0.293758	0.57072	857.668	299.212	519.184	290.952	245.502
CLDN4	ENSOART00000027086	82.3191	34.17	12.7411	16.3814	11.5756	161.244	200.205	270.269	218.567	140.642	23.0876	13.3268	16.934	50.1284	31.2418	84.4603	55.2755	106.278	85.519	86.584
CLDN7	ENSOART00000012298	238.261	131.185	39.7983	36.5441	29.0627	461.496	750.138	677.908	633.393	539.852	8.16432	3.48551	5.02273	5.21959	5.86384	814.177	473.801	728.842	538.249	461.747
CLDN12	ENSOART00000008803	27.4226	16.1848	10.0002	15.6989	14.4148	16.2504	22.7555	16.4503	17.9224	18.7704	9.61635	7.23595	8.80159	8.84474	9.98176	17.7289	14.9352	29.1788	15.0041	11.4002
CLDN15	ENSOART00000016262	1.53376	0.32858	0.199883	0.150608	0.400996	0.699165	1.28556	0.791334	0.773393	0.547322	1.22836	1.98294	1.65161	2.06989	1.86577	60.7142	51.7283	93.8999	54.0834	38.9788
F11R	ENSOART00000010100	97.3497	66.8639	49.5863	60.3377	57.6148	78.9302	95.406	93.3174	77.0641	66.2158	69.6354	50.2655	63.0417	62.199	59.3674	137.822	90.2336	163.837	86.5765	91.127
ICAM1	ENSOART00000017039	9.80868	1.67082	0.442378	0.17606	0.199373	9.91258	12.3916	25.5011	12.8157	16.3979	21.6274	18.3139	16.7884	38.1902	20.563	44.7454	39.8827	28.1851	40.3108	51.2956
JAM2	ENSOART00000016549	0	0	0	0	0	0.0667823	0	0	0	0	3.93435	4.08204	3.82223	3.40688	4.4965	6.29768	7.48672	8.34001	8.0228	8.59865
OCLN	ENSOART00000006051	67.7436	74.8333	61.7498	58.9043	66.2364	26.5906	46.5043	40.6165	38.6082	33.9903	30.5076	22.7724	27.1474	26.0554	27.9834	22.8497	18.4173	29.9928	15.9691	18.4237
TJP1	ENSOART00000018007	32.6324	29.1391	16.5089	21.9071	24.3577	29.141	34.6504	36.6693	34.823	30.6418	13.433	11.5035	13.1461	12.0127	11.9011	13.6862	16.7311	21.291	15.1055	18.2889
TJP2	ENSOART00000014185	12.7681	10.3196	7.2327	9.4717	11.9179	13.3535	13.8369	19.5477	19.1881	14.9841	11.3864	8.72617	8.44045	11.1797	9.54756	13.4515	11.7591	17.5002	10.8684	13.4125
TJP3	ENSOART00000012994	35.2722	26.4421	25.4611	31.2427	36.4101	17.6733	22.593	28.1177	33.0938	28.2629	49.3475	37.806	40.4001	40.1177	45.0666	29.0842	19.7681	35.3955	18.8564	18.9981
GJB1	ENSOART00000018200	13.7416	8.45979	5.00188	5.1996	4.41919	15.4576	29.7041	26.3326	27.9441	29.015	7.75845	8.76741	6.87086	11.1831	6.11483	11.231	7.00636	11.0898	11.092	4.35842
CDH1	ENSOART00000003758	123.782	107.76	76.1306	99.3146	103.789	110.525	156.237	165.254	165.377	126.288	63.9057	46.9546	52.3094	66.5876	54.3239	87.8443	74.6628	112.346	74.6953	80.6862
DLL1	ENSOART00000005568	4.9177	1.21936	1.27321	0.858931	1.41535	11.7408	16.3079	3.67258	10.915	7.50652	2.63388	2.31481	2.3921	2.8402	2.47449	7.03283	6.6142	8.73593	5.79074	5.83941
NOTCH1	ENSOART00000004157	3.74106	2.58064	1.67373	2.41958	4.68815	10.1285	19.4724	7.56517	18.2149	13.8272	1.46809	1.71547	1.77514	2.32959	2.65067	7.8486	8.37202	10.4509	5.80595	9.32795
NOTCH2	ENSOART00000022263	10.9737	8.30377	4.14427	7.17956	8.19817	8.05886	10.3218	10.2938	12.2478	11.5609	2.12375	3.26246	2.63916	2.86808	3.34958	4.79845	6.98999	8.02104	5.70027	9.21395
NOTCH3	ENSOART00000004330	0.558001	0.137791	0.124783	0.3338	0.378729	1.2364	1.29732	3.41464	2.94619	1.90781	2.07738	2.41689	2.95875	1.94963	2.23321	4.10346	4.09298	4.697	3.93347	3.8414
DSC2	ENSOART00000007393	41.1288	34.0723	16.801	23.9148	25.6801	22.2983	22.4236	35.1332	26.2894	24.2089	22.0112	17.6294	24.4281	19.1166	21.373	27.1655	22.6888	36.424	20.2549	30.9435
DSG2	ENSOART00000006960	59.6499	52.9038	28.805	40.3302	42.528	63.3023	77.0755	57.541	65.1986	62.3432	27.4972	21.667	22.3952	25.291	25.8028	30.5331	26.6708	44.6806	25.8762	34.1232
DSP	ENSOART00000019105	67.0646	88.7115	57.8732	80.4168	104.564	80.1684	89.4735	59.1953	80.0364	75.3437	47.9384	36.6311	39.251	34.3866	43.1247	54.9463	42.8803	69.1658	30.6033	40.5459
JUP	ENSOART00000019026	37.3912	29.2395	23.6855	26.4974	31.6673	43.1584	47.7545	42.8515	52.9694	45.7141	33.4326	24.0976	27.1193	32.9265	28.4077	47.9385	31.3582	45.2022	33.4376	33.0906
BMI1	ENSOART00000001455	52.2253	51.4415	57.8453	51.3429	40.3825	52.8635	71.1661	53.3806	55.7901	47.8358	64.7717	61.0897	52.9333	62.1068	61.3341	79.7207	86.6775	102.274	94.6034	90.9729
HOPX	ENSOART00000005296	43.6091	45.2388	16.7237	45.0848	49.3585	336.263	260.961	135.81	372.773	141.894	23.7719	43.8683	18.3429	14.1566	25.4931	207.736	169.077	350.251	133.63	104.954
LGR5	ENSOART00000015850	13.3228	11.2371	4.9266	5.09188	6.71628	17.734	30.5642	17.4096	23.0514	21.0158	1.05856	1.84191	2.60496	1.47709	2.31764	0.989289	1.16406	2.54815	1.27685	1.33942
LRIG1	ENSOART00000011480	27.6541	20.4036	13.9165	18.7523	25.7524	26.1309	40.6229	18.2589	32.5793	29.2478	26.1875	21.4903	26.2041	21.1208	26.3427	9.6125	14.8125	16.7918	11.8933	15.1991
OLFM4 (1)	ENSOART00000007293	94.3865	34.3046	2.4507	1.49816	5.89901	408.382	368.835	423.076	267.369	354.13	10.7676	3.13052	8.56523	28.5631	9	273.949	169.224	110.084	377.263	138.483
OLFM4 (2)	ENSOART00000007290	10.9764	5.61652	2.6896e-06	0.322959	0.569021	0.391534	1.04413	0	1.70759	1.76978	0	0.711026	0.192429	0.749899	0.681681	0.676603	1.43759e-09	0.504274	1.11089	2.89919e-05
MKI67	ENSOART00000015858	61.3706	36.647	12.9442	25.9173	29.747	61.9479	70.3879	24.6536	43.405	44.1071	5.5152	5.31284	6.38761	12.497	9.00125	28.5385	64.7306	16.7661	59.0969	95.0887
EPHB2	ENSOART00000008616	8.93262	7.15755	4.13496	4.73849	5.67558	19.539	27.0521	13.3659	23.0241	17.8195	2.77096	2.12032	2.01235	2.98506	2.46719	12.1102	8.83755	12.4901	9.72228	9.21143
DMBT1	ENSOART00000008689	0.977914	4.31212	10.3494	19.5469	21.0554	189.717	176.679	566.562	508.535	433.189	35.7781	2.97758	13.3055	91.3162	13.5176	31.43	36.4177	28.6017	41.9714	50.7011
OAT	ENSOART00000010941	53.7897	30.0392	15.6887	19.0172	19.902	111.021	105.086	97.5721	103.561	104.574	12.1711	13.0316	13.0888	20.7151	16.999	291.517	240.975	353.862	259.547	279.721
REG3G	ENSOART00000022147	0	0	0	0	0.0137593	77.6641	12.1523	1.74037	5.12011	7.57372	0.108047	0.0896873	0.0762282	0.534373	0.0468362	1145.3	723.455	1255.67	1497.67	719.914
TMEM38B	ENSOART00000007886	21.6698	17.2531	13.8847	15.1256	12.921	12.0477	15.6143	18.6609	15.6435	16.1193	6.85474	5.92875	6.2212	4.9061	5.35433	4.99261	5.19803	5.77605	5.75908	6.71944
FABP1	ENSOART00000022608	0.132903	0.130854	0	0	0	1.04188	0	0.334483	2.80669	0	0.541037	0.275945	0.18547	1.11582	0.265236	0.482022	0.695654	0.253183	0.700039	1.92656
GSTM1	ENSOART00000021014	30.4139	52.8067	50.224	42.3919	45.1673	66.9325	80.5401	90.3081	91.3427	95.1513	28.4699	31.9484	30.1654	34.0313	31.9905	151.485	98.501	130.515	152.059	136.172
GSTM3	ENSOART00000021038	6.18723	6.17201	4.72917	5.6574	4.26274	13.7908	15.6966	22.0397	17.9727	18.8959	4.22481	5.29225	3.52211	4.27135	4.76904	20.471	14.0172	20.2856	28.5421	16.7015
ALPI	ENSOART00000022646	0	0	0	0	0	0.298079	0.0445945	0.0876782	0.383176	0.0651485	0.191346	0.213507	0.0944884	0.288032	0.198298	74.7137	40.6765	96.2877	52.0156	38.9893
APOA1	ENSOART00000002803	0.625983	0.245255	0.30548	0.612492	0.455346	0.690045	2.09634	3.77146	1.47639	0.56405	16.492	11.5537	13.8916	9.66676	16.0231	1382.29	287.763	2824.06	1389.51	606.199
APOA4	ENSOART00000002622	0	0	0	0	0.0221051	0.0253926	0.0453234	0	0.0530341	0	0	0	0	0	0	60.5174	26.8616	271.517	112.042	92.9818
APOC3	ENSOART00000002726	0	0	0	0	0	0	0	0	0	0	0.435543	0.249852	0	0	0.35849	60.6852	9.91827	251.586	92.9	43.5822
PRAP1	ENSOART00000000775	3.18468	1.57805	6.71099	1.71541	6.25756	3.19482	0.939851	0.672288	9.6049	0.57545	6.04096	1.95349	3.5848	5.17559	5.08336	6759.32	3237.16	7238.03	2710.83	2588.56
VIL1	ENSOART00000021318	102.361	96.7205	60.494	94.7678	93.3506	255.398	267.265	200.596	252.254	241.963	31.28	22.7983	23.5515	29.8722	31.6898	602.812	378.896	819.012	371.002	390.038
ATOH1	ENSOART00000019813	0	0	0	0	0	3.22968	1.64303	0.274294	1.9609	0.403423	0	0	0	0	0	10.6956	7.78732	15.6193	10.157	6.83302
AGR2	ENSOART00000009774	438.203	455.466	376.919	460.394	368.542	388.656	338.471	290.795	284.656	289.649	505.3	264.068	531.535	578.961	444.792	256.202	164.001	260.387	215.3	200.382
CLCA3	ENSOART00000016132	0.358935	2.56568	1.0089	2.39934	3.53443	0.636337	1.61458	2.39325	8.12208	3.33769	0.549277	0.389876	0.788912	1.03398	1.89536	1.29826	1.2597	3.25063	1.05626	2.16697
KLF4	ENSOART00000007798	9.58436	1.5873	2.35038	5.65211	2.85281	8.93117	3.84985	3.52622	6.83168	2.93647	61.2455	45.9198	64.2154	78.9469	61.306	95.7668	56.8748	133.169	71.9499	55.1853
MUC2	ENSOART00000010355	0.149129	0.137929	0.0856471	0.147114	0.124415	6.64254	1.63008	0.334465	2.30584	0.402213	5.40307	1.67011	1.96502	7.4673	1.86882	144.656	128.853	117.145	93.1872	94.4556
CD24	ENSOART00000012053	1690.51	3629.89	2713.59	3229.92	3395.28	1697.47	1869.02	1515.39	1799.46	1018.76	5769.28	4746.28	5192.58	4859.75	5472.5	1606.59	1065.82	1682.33	1788.56	1208.05
DEFB	No BLAST hit with bovine DEFB
DEFB1	ENSOART00000006919	0	0	0	0	0	4999.04	2705.35	1430.7	787.571	521.673	8.39072	1.12795	2.3054	2.508	2.62563	45.9585	38.9989	0	31.127	59.6874
LYZ1_t1	ENSOART00000022204	43.356	181.51	832.608	611.029	571.838	1.4354	1.87611	1.55335	1.52631	1.27706	2116.36	1942.53	2426.11	1548.5	1476.48	5.05632	6.33103	19.0526	11.2004	7.91573
LYZ1_t2	ENSOART00000022207.1	3785.34	15704.3	69925.3	54048	54580.2	0	1.14373	0.128353	0.323913	0.527062	170210	236356	237970	190597	198713	1.34784	7.03027	3.57803	9.32228	6.46751
SOX9	ENSOART00000014989	23.9874	15.8909	17.7588	24.4206	36.6347	30.8448	32.5255	23.1268	32.1442	32.5765	13.5219	8.27882	8.22886	11.9228	8.23192	6.032	6.3886	7.97267	5.88414	6.40439
NEUROG3	ENSOART00000006114	0	0.228516	2.24132	0.427172	0.194257	20.7739	28.0693	2.88233	14.9586	4.65563	1.05786	0.441815	0.315889	0.857733	0.909982	1.53659	1.08162	1.58862	1.45029	1.95603
PAX4	ENSOART00000002098	0	0	0.122189	0	0	0.254269	1.33581	0.148452	0.442184	0	0.749117	0.904549	1.293	0.613773	0.844464	0.174218	0.379574	0.735446	0.347994	0.432947
KRT7	ENSOART00000018705	231.081	155.243	97.9433	134.042	169.003	723.043	504.036	645.965	595.754	571.486	20.321	8.41867	21.9964	16.8851	16.3922	0.540009	0.70342	1.26518	0.752086	1.0499
AFP	ENSOART00000015211	0.677482	0.473801	0.375169	0.465284	0.498006	0.7549	0.942279	0.857043	0.936158	0.672259	1.20616	1.05793	1.05522	0.821507	1.20787	1.93864	1.79389	2.16991	1.11872	2.65363
CHGA	ENSOART00000014516	6.40589	0.885607	1.82662	2.19801	1.48409	56.4	183.577	27.7679	68.4891	30.6574	232.078	127.392	142.615	191.584	149.555	125.241	134.827	123.973	167.613	182.574
CHGB	ENSOART00000019526	0.0675968	0.0662749	0.0143399	0.0427581	0.069265	0.0790312	0.518082	0.01737	0.0414108	0	0.713516	1.11826	0.866557	0.373061	0.810425	0.292738	0.797498	0.875664	0.868338	0.378022
REG4	ENSOART00000022248	0	0	0	0	0	458.488	203.92	137.643	381.678	214.834	1.89588	0.891795	1.36962	0.398963	0.642135	1580.76	1077.81	1708.01	892.051	1005.39
TPH1	ENSOART00000001447	0.0178156	0	0.0565662	0.0187673	0	1.16262	1.08522	0.160011	0.272444	0.223826	0.759831	0.90304	0.733298	0.688153	0.68957	0.364114	0.505612	0.969873	0.778088	0.917254
UCN3	ENSOART00000005027	0	0	0	0	0	0	0.234312	0	0	0	0	0	0	0	0	0	0.220788	0.771411	0.355557	0.279385
VGF	ENSOART00000011807	0	0	0	0	0.0416018	1.936	0.947011	0.126378	0.501699	0.309927	0.246745	0.240143	0.168166	0.091465	0.436113	0.238366	0.587787	0.233504	0.554029	0.104763
CCK	ENSOART00000003598	0	0	0.32978	0	0.130847	0	0.69649	0	0	0	0	0	0	0	0.161042	0.975673	3.29631	1.38817	4.55858	0.665368
GHRL	ENSOART00000012541	92.4912	3.95288	0.377267	0.383777	0	0.119388	0	0.153569	0	0	7379.28	5843.81	6448.04	5714.33	7177.72	1.32538	0.596212	0.231803	0.639439	0.252865
NTS	ENSOART00000016759	0	0	0	0	0	0	0.0582287	0	0	0	0	0	0.00902154	0	0	3.05617	3.17204	32.6467	2.10695	2.73241
GCG	ENSOART00000006917	0.517576	0.536651	0.282888	0.553992	0.509904	12.8077	62.1021	89.2662	58.3234	21.5373	1.62873	1.1227	0.943371	1.3852	0.805209	45.8882	27.2788	53.4037	45.307	28.2791
DCLK1	ENSOART00000011423	0.0982228	0	0.0207717	0.0206871	0.0334246	3.11846	1.57214	0.957249	0.620459	1.21277	0.311903	0.763521	0.463954	0.234851	0.760626	0.165279	0.488624	0.350319	0.353276	0.715625
GFI1B	ENSOART00000006067	0	0.0279156	0	0	0	0.277317	0.0742241	0	0.0289402	0	0.0237242	0.0591979	0.0576875	0.104775	0	2.1548	1.98095	2.86078	2.61058	1.7611
IL25	ENSOART00000021045	0.0801478	0	0	0	0	0.156214	0.0691783	0	0	0	0.393687	0.440936	0.0545927	0.0738449	0	0.576595	0.669366	0.302302	0.414128	0.50041
KRT8	ENSOART00000018281	703.169	498	410.547	679.032	539.565	3497.06	1481.84	2934	1856.6	1757.29	680.661	483.528	836.598	1089.58	701.356	1857	1190.08	1919.56	1465.11	1288.51
PLCG2	ENSOART00000009806	6.39646	6.72758	4.32225	6.17794	6.71045	6.50972	5.43217	2.78285	3.25607	3.87809	7.12702	7.30406	7.666	7.21271	7.41445	22.5889	47.0409	30.2036	43.3766	64.149
POU2F3	ENSOART00000018317	0.402121	0.335827	0.12629	0.141276	0.139775	3.36613	1.12819	0.975478	0.592768	0.811547	0.224455	0.175928	0.0904406	0.342463	0.144036	0.232864	0.593625	0.712985	0.943825	0.768169
TRPM5	ENSOART00000003123	0.204407	0.0471585	0.025527	0.0126796	0.071936	2.60097	1.15228	0.108192	0.208813	0.176553	0.493872	0.376232	0.292049	0.409237	0.499755	0.766768	0.789781	1.9753	0.813485	0.647146
IFIT3	ENSOART00000016107	1.60838	0.760443	0.740563	1.07616	0.740817	3.13293	1.99195	3.08228	2.86074	2.25765	10.0754	6.94852	15.6155	62.433	29.3021	25.4747	27.2306	32.9094	19.7528	21.9864
MX1	ENSOART00000011195	18.808	7.80273	3.46139	2.89467	3.09246	5.88	4.21669	3.83469	4.04961	4.29695	23.2255	16.8819	33.1567	124.273	59.8864	33.9551	56.4822	38.2867	38.223	39.8041
SLC5A5-iodine	ENSOART00000015499	0.169974	0.180532	0	0.0447931	0	0.0275996	0.0123349	0.0363903	0.057836	0.0742309	250.878	247.546	252.076	269.389	265.334	0.0340754	0.11743	0.58503	0.230475	0.761354
DUOX1	ENSOART00000022937	0.00533048	0	0.00567784	0	0	0	0	0.0137333	0	0	0.306075	0.198685	0.322977	0.465286	0.565032	0.058306	0.0275451	0.0156304	0.0323849	0.0598838
DUOX2	ENSOART00000022943	0.00507129	0.00951223	0	0.010247	0.00870543	0.0450449	0.00442425	0.0195999	0	0	8.74923	7.85969	9.86644	17.0077	18.7934	1.35848	0.630997	0.270915	1.15526	0.741117
MCT1	ENSOART00000015680	0	0.0280831	0	0.0150969	0	0.0418598	0.0124718	0.0183968	0.0877151	0	0.683673	0.328455	0.309231	0.474244	0.650935	27.2015	19.5963	43.7472	21.8445	21.3685
MCT2	ENSOART00000005094	20.7565	21.8113	10.8695	15.3925	13.9693	9.31462	15.8681	16.0618	19.7303	16.8634	32.2407	24.1795	17.6314	15.5528	33.7533	3.34403	3.77746	5.26949	4.02845	4.64245
MCT9	ENSOART00000004566	0.307888	0.0503027	0.181098	0.0360418	0.0437223	0.0166611	0.238188	0.0219518	0	0	1.48808	3.55181	3.78564	3.74407	4.22007	0.0205661	0.0981782	0.176607	0.117185	0.256971
PGC	ENSOART00000002750	0.527536	0.178389	0.0580165	0.0575794	0.0623002	0.00886433	0.0158572	0.0117026	0.018602	0.00954804	139.24	136.002	107.938	173.224	116.468	0.0328447	0.0232001	0.0512336	0	0.0392327
PGA5	ENSOART00000013102	57.106	66.4033	94.8377	71.9016	95.9218	0.108014	0.0771567	0.0852792	0.135503	0.0231964	1341.85	14689.4	21045	2674.36	30173.1	0.026656	0.3679	0.0208216	0.569954	0.237337
ATP4A	ENSOART00000005310	0.0404978	0.00794318	0	0	0	0.00789428	0	0	0	0.0170104	1301.27	1083.17	995.005	712.081	930.516	0	0.0593962	0.00760416	0.0763031	0
SHH	ENSOART00000021552	8.30518	3.0114	3.13288	4.70236	2.41159	8.2088	5.16393	9.13511	11.6213	9.52395	67.2497	45.1515	49.7917	65.7351	50.5281	87.5712	44.7027	108.09	53.1543	36.9879
HBEGF	ENSOART00000019070	2.35197	0.756136	0.412933	0.824026	0.784907	0.675627	0.862401	1.87877	1.19228	0.921913	2.26825	1.06414	1.51418	1.13505	1.29719	0.984018	1.20874	2.0938	1.81786	1.72525
AREG	ENSOART00000016381	1.76435	1.12331	1.01364	0.462243	0.776489	9.60966	56.0599	99.512	76.2806	18.791	8.65437	4.93107	7.38795	8.79674	9.30809	15.4832	5.40415	14.2777	11.1059	15.926
FGF10	ENSOART00000009297	0	0	0	0	0	0.269671	0	0	0	0	2.0583	1.25989	1.72513	1.2737	1.56651	1.52666	2.28492	2.34191	2.65969	2.90907
HES1	ENSOART00000022239	63.9126	53.4637	48.9067	60.4434	64.6379	60.3285	71.3555	71.4096	60.3883	63.0083	29.3916	19.3555	21.2473	22.1158	22.3518	48.5714	36.1356	62.8189	43.2605	41.155
ADAM10_t1	ENSOART00000022716	12.6649	12.8434	7.70421	11.2716	11.5806	9.4122	10.8946	9.11952	11.987	11.9167	7.91409	5.8537	6.47585	8.0789	10.0779	6.83629	7.96689	15.2463	7.51884	12.6375
ADAM10_t2	ENSOART00000022717	20.6709	15.784	10.2875	14.9248	13.5866	13.2634	18.4116	13.4677	15.0989	12.8524	12.508	8.5629	9.50954	14.2479	11.2024	13.4652	16.3859	20.6231	14.3125	19.5217
ADAM17	ENSOART00000016508	26.1015	17.2311	9.72073	13.0147	12.7235	18.407	24.641	21.9111	19.699	20.2423	9.19946	7.91113	7.02599	9.94628	7.82951	17.4804	20.5477	20.8335	19.2808	23.8638
Wnt5A	ENSOART00000016754	0.0640127	0.0156943	0	0	0	4.96007	0.139532	0.0205975	0.188268	0.0756232	8.14934	7.9919	7.13106	5.56528	8.81808	6.03029	6.07187	6.67083	5.02991	7.2529
BMP4	ENSOART00000022955	0.702341	0.492819	0.260842	0.383757	0.374732	1.74788	1.74584	3.93281	2.19925	1.17319	5.80072	7.85297	8.64451	6.29565	8.46097	8.63373	8.79163	10.8836	8.07343	7.58779
FGF20	ENSOART00000010435	11.8071	7.52977	6.39539	7.08936	7.61908	35.9473	39.4637	50.6473	41.9986	35.9246	10.0092	7.20713	7.15215	6.71569	10.6202	52.0772	45.3677	40.1571	30.1553	65.8649
CBLIF (GIF)	ENSOART00000013366	11.4347	9.86072	3.4936	2.39283	1.37637	0	0.0391384	0.028838	0.0458213	0.0235324	1060.41	400.939	818.479	713.079	735.176	0.216348	0.366088	0.422501	0.0192755	0.14445
AQP4	ENSOART00000007588	0.372926	0.148027	0.122727	0.22485	0.136861	0.0951907	0.00774042	0.0114251	0	0	14.2343	9.85515	15.5031	7.20472	11.1078	0.1817	0.249133	0.26675	0.26615	0.45966
KCNQ1	ENSOART00000003030	203.594	331.432	249.576	363.134	351.86	133.402	157.655	153.219	154.141	153.015	185.765	114.275	132.555	107.611	115.223	25.0883	13.8176	17.8447	12.5172	10.4605
HDC	ENSOART00000022870	0.0793101	0	0	0.0139361	0	0.0128789	0	0	0	0	14.8957	11.3019	11.3087	13.3745	10.1342	0.143116	0.670154	0.657641	0.283002	0.39811
HRH2	ENSOART00000018114	0.60427	0.09866	0.140999	1.09303	0.538152	0.130666	0	0	0	0	18.9707	14.8614	18.6952	11.9119	19.0929	2.13433	3.63015	5.04016	6.95714	3.42392
CCKBR	ENSOART00000020405	57.8623	82.4207	97.6477	113.807	139.548	0.21764	1.13094	0.989796	2.40061	2.338	75.7	55.055	75.595	46.0169	72.3422	0.0976679	0.142535	0.133479	1.79203	0.26111
MUC5AC	ENSOART00000010193	0.521352	0.385149	0.439607	1.10062	0.777922	0.607182	1.62976	3.63542	2.70249	0.874874	1262.86	1097.05	1550.15	1189.4	1337.52	0.0244582	0.0410162	0.0190706	0.0521885	0.073118
MUC1	ENSOART00000004114	121.879	81.4396	69.2287	75.0467	88.5634	10.4029	9.0491	7.63787	5.73218	3.91868	157.303	122.692	133.714	205.096	182.265	2.99852	2.05451	1.80454	2.32801	1.96874
ATP1A1	ENSOART00000022009	107.824	81.1665	47.374	60.944	60.1571	130.755	152.058	121.64	143.52	129.556	47.0998	32.895	34.815	47.6482	43.2263	204.536	145.2	213.414	136.571	143.105
HSDL2	ENSOART00000007088	0	0	0	0	0	0	0	0	0	0	0	0	0	0	0	0	0	0	0	0
PIGQ	ENSOART00000013483	42.0077	27.0891	22.9705	29.5106	41.5932	31.772	44.9708	30.946	49.1431	41.3372	21.9884	16.0043	20.3175	20.0916	21.9625	19.6549	19.5418	18.5509	18.4531	21.2253
APLP2	ENSOART00000016027	50.9399	49.9858	35.9299	41.9702	86.5133	36.5393	40.6483	48.3807	72.8911	62.3275	25.6644	16.1876	21.7398	30.3339	29.8951	9.73247	7.571	10.2456	7.31148	8.32602
EEF2	ENSOART00000012084	606.307	542.408	411.429	484.315	498.855	501.125	445.079	469.959	472.771	494.807	165.437	145.46	138.512	149.373	134.654	224.371	237.306	227.486	210.681	249.686
ATP2B1	ENSOART00000017068	19.0193	14.0735	8.29323	11.3503	10.4007	20.0712	30.4809	23.9613	24.8265	21.9393	6.73219	4.63461	5.41233	5.6972	5.3249	19.1226	18.6122	24.8668	14.585	17.6492
TLRs
TLR1	ENSOART00000000573	0.0896047	0.0630077	0.105626	0.0434422	0.0642845	0.0963245	0.0326688	0.0363843	0.0145279	0	2.90545	3.1332	0.769957	2.75294	3.38576	4.61913	8.30891	2.96752	9.47754	11.3264
TLR2	ENSOART00000016373	0.206571	0.479739	0.461908	0.607774	0.781089	2.03416	1.75269	1.17437	1.98887	0.901147	0.957371	0.839376	1.08561	1.42019	1.35535	7.20906	6.41318	10.0636	7.09496	7.72949
TLR3	ENSOART00000008770	5.42192	2.75423	1.17642	2.09978	1.95062	2.8369	2.4563	2.32121	2.5866	3.18248	8.24144	8.2699	5.59046	10.686	9.64956	2.97765	3.17282	5.73624	3.24959	3.77036
TLR4	ENSOART00000006304	0.0503202	0.00986883	0.0106938	0	0.00861176	1.97134	2.52612	4.66013	2.98353	2.21796	1.05536	1.35124	1.18823	1.86091	1.41001	3.1977	3.902	3.40129	5.02485	5.79189
TLR5	ENSOART00000005460	9.50115	8.28179	5.22896	6.20212	5.87723	17.2917	26.8783	14.3278	17.6157	15.0649	1.98282	3.40285	1.51594	1.12264	1.00125	11.5988	8.62805	12.7476	8.77558	10.7953
TLR6	ENSOART00000000595	2.44088	2.93128	1.92459	1.89361	2.24634	2.22395	1.90261	2.21539	2.1897	2.35252	3.31302	4.24545	2.35733	3.39917	3.35612	4.11149	7.63098	4.44356	5.78698	7.57567
TLR7	ENSOART00000012274	0.161676	0.0576581	0.0312786	0.0542938	0.0629883	0.308009	0.1538	0.0378425	0.0225587	0.100343	0.438209	0.762253	0.436289	0.709922	0.645835	0.637062	1.20669	0.689953	1.02589	1.85638
TLR8	ENSOART00000019697	0	0.00787707	0	0	0	0.140915	0.00700317	0	0	0	0.60695	0.995106	0.682773	2.00996	1.10938	4.83488	6.28967	7.08087	5.97776	7.7138
TLR9	ENSOART00000006702	0.288151	0.0342521	0.00928461	0.0368542	0.0149558	0.272326	0.13702	0.0786523	0.125025	0.0458369	0.263854	0.303823	0.235639	0.457888	0.438613	2.0812	4.39883	0.516452	4.95052	6.81878
TLR10	ENSOART00000000555	0	0	0	0	0	0.0203857	0	0	0	0	0.429892	0.603885	0.50809	0.606186	0.505357	2.41687	3.98535	1.23723	5.65229	6.35616
CLRs
Dectin-1	ENSOART00000022895	4.37251	1.70556	0.769849	1.1872	1.54742	4.39616	2.3971	2.56863	2.27368	2.69385	6.09437	6.70553	4.9401	13.1359	8.58137	6.01737	8.19432	12.4709	8.32244	10.9551
Dectin-2	ENSOART00020019109	0	0	0	0	0	0.216536	0	0	0	0	0.538943	2.01052	1.27266	1.6663	2.233	0.540743	0.594212	0.861322	0.595658	0
DCIR	ENSOART00000002727	0.14204	0.139095	0.0493819	0.148777	0	1.10509	0.327724	0.360892	0.382108	0.147478	1.99651	2.22007	2.23906	3.17555	2.53368	7.8794	12.767	11.6824	11.3499	9.17953
DNGR-1	ENSOART00000022899	0	0	0	0	0	0	0	0	0	0	1.22644	2.04274	0.473873	2.64875	1.68618	10.8086	18.2774	12.8608	16.1038	15.0385
Langerin	ENSOART00000012215	0	0	0	0	0	0.0884069	0	0	0	0	0.100781	0.0419203	0.0408739	0.0278362	0.0293706	0.0363411	0.0482881	0.113654	0.0259292	0.25788
MCL	ENSOART00000002835	0	0	0	0	0	0.485408	0	0	0	0	0.04574	0.076357	0.0375027	0.152844	0	0.132753	0.265688	0.20817	0.142484	0.116363
MICL	ENSOART00000022908	0.773164	0.730393	0.47079	0.510462	0.427482	0.606621	0.784791	0.624827	0.492931	0.309375	1.20676	1.06372	0.65301	1.0077	1.18359	1.29921	2.19545	2.05453	1.50857	2.5682
Mincle	ENSOART00000002944	0	0	0	0	0	0.108647	0	0	0	0	0.598833	0.384513	0.453298	1.07742	0.435257	1.33707	1.1775	0	5.83627	5.27297
Cytokines
IL-1A	ENSOART00000022747	1.05139	0.225314	0.172559	0.0690401	0.0554654	2.30203	0.997808	1.34273	0.966227	0.684891	13.1371	8.68306	11.2887	24.7973	12.7216	3.38987	3.5738	3.29891	4.2205	4.74936
IL-1B	ENSOART00000022733	0.629573	0.549802	0.505465	0.534161	0.594021	1.2123	1.56419	1.04641	1.16652	0.844106	1.98688	2.19706	1.27508	1.19167	1.39239	2.53623	2.82656	3.20908	2.44309	3.13673
IL10	ENSOART00000006848	0	0	0	0	0	0.361503	0.320231	0	0.0744033	0	0.730242	0.306072	0.50445	1.36732	1.30798	6.75773	10.331	3.63572	12.1332	16.5477
IL19	ENSOART00000007002	0	0	0	0	0	0.00593067	0.00530672	0.015671	0.0124562	0	0	0.0042366	0	0.0167932	0	0	0	0	0.00521059	0
IL17REL	ENSOART00000021414	0.177913	0.209128	0.186623	0	0.0599583	0.311579	0	0.0908075	0	0.0370559	2.18643	1.15623	1.53729	1.7989	1.20904	7.04086	12.2006	1.03502	11.7315	10.1924
IL18BP	ENSOART00000003786	8.19286	8.45484	10.0655	12.3862	12.1502	11.8357	32.9314	11.8075	19.9466	9.66	28.2149	28.3078	32.6979	29.0326	25.0371	76.2899	78.3138	80.7797	75.4421	83.8172
IL21R	ENSOART00000020576	0.0153781	0	0.0162959	0	0	0.179771	0.0401653	0.0197465	0.0156912	0.0483365	1.46752	2.842	2.47988	3.05513	2.21618	26.3914	60.8781	7.62163	64.6751	78.4675
IL27RA	ENSOART00000007421	38.3181	52.7195	42.8084	56.0299	53.6724	29.7866	61.6827	53.5793	55.9378	53.1778	34.8129	21.5473	23.1775	30.447	22.9822	33.7678	39.867	30.0478	40.623	43.4618
CISH	ENSOART00000009467	1.34448	0.217104	0.974837	0.204491	0.35426	0.689212	1.99252	0.843294	0.358545	0.182404	2.05843	2.36045	3.4109	2.71501	2.50042	5.82507	5.13264	6.92258	3.45404	2.81526
IL4I1	ENSOART00000014881	6.93209	6.03901	5.37479	6.04334	11.2986	9.94516	8.81899	8.39452	14.7072	15.4156	5.85472	4.93617	4.3478	9.31731	7.8634	15.1381	10.2484	9.21316	9.4444	12.4871
IL13RA1	ENSOART00000018048	13.7344	13.4586	9.99339	11.8343	12.5227	14.9628	13.6797	17.9937	15.4976	14.1487	9.71474	9.01241	8.18024	8.82108	10.0843	11.8814	12.4656	21.8499	12.1048	14.9729
IFNGR1	ENSOART00000000546	29.7932	17.2845	12.6761	13.3626	12.0211	31.913	31.0651	38.4091	31.4422	28.0589	21.0176	17.3135	14.1971	21.6332	15.8711	70.9146	58.3956	82.6164	76.4015	68.333
LTBP2	ENSOART00000001279	0.114528	0.0641932	0.00435961	0.0129588	0.0140513	2.23312	0.578196	2.46689	1.24445	0.993401	1.97789	1.38778	2.45026	2.75496	2.05281	2.05455	3.80918	1.08686	4.09164	4.72526
TGFBI	ENSOART00000016423	0.108155	0.02651	0.0716996	0.0427581	0.0577208	6.23029	0.41211	0.0694802	0.0552143	0.0283457	10.5782	11.8404	10.6176	11.1297	12.9145	44.1221	45.6427	46.5244	46.8439	42.9782
TNFRSF18	ENSOART00000006760	0.835397	0.866317	0.409658	0.308788	0.0821747	1.9592	0.255018	0.24959	0	0.102012	4.83264	4.67466	4.51622	8.89476	4.73652	18.6516	20.9533	12.3117	16.83	28.5572
TNFRSF13C	ENSOART00000020419	0.0678938	0.132907	0	0	0	0.396693	0	0	0	0	2.78864	2.75469	3.03959	4.43592	3.78227	33.4146	64.1685	4.47047	74.0412	70.5768
TNFRSF25	ENSOART00000013235	0.0654287	0	0.0691064	0.0688736	0	0.530925	0.625797	0.25153	1.1324	0.410504	2.02121	1.92138	1.75136	2.0456	1.7952	5.13627	4.14518	4.48266	3.51116	4.24727
LTB	ENSOART00000008986	0.586828	0.0884084	0.188513	0.189186	0.113452	0.658518	0.898689	0.229551	0.410243	0.656455	10.0466	16.5059	7.80492	16.0962	8.60568	78.4513	150.711	14.3559	136.477	173.649
TNFRSF1B	ENSOART00000018725	5.56819	1.43307	0.365324	0.36345	0.658041	4.608	1.5441	2.12951	1.65862	1.49674	6.78944	7.0165	6.11778	9.36621	8.8824	17.1241	14.702	16.2193	12.9831	19.4671
CSF2	ENSOART00000016787	0.316795	0	0	0	0	1.03174	0.0913259	0.266309	0	0	0.0862011	0.437116	0	0.293989	0.208788	0	0.718847	0.800616	0.825612	0.875991
CSF3	ENSOART00000013705	0.0610467	0.0598009	0.0633639	0.0638534	0.101552	0.118814	0.210999	0	0.0613718	0.126526	0	0.630394	0.16539	0.393018	0.476756	0.0731025	0.214777	0.286825	0.209487	0.383369
CSF2RB	ENSOART00000020792	0.0281717	0	0	0	0	0.851114	0.0163707	0	0.0288054	0	4.25524	6.25939	3.67456	6.66924	5.00791	13.428	19.7043	18.293	15.0631	21.6261
TNF	ENSOART00000009066	4.34065	0.944657	0.150826	0.101027	0.040343	1.78226	2.8371	3.06231	1.55629	1.30164	1.8339	2.89303	1.72712	4.16518	1.87754	6.40936	12.9745	6.78712	12.2221	10.0578
Chemokines
CXCL16	ENSOART00000008361	5.92775	4.3802	2.7922	2.60378	2.91658	2.78275	5.33197	5.09006	3.98839	3.6896	4.50816	4.57558	3.27137	6.38621	5.02523	16.0181	12.719	12.6007	12.0022	12.3569
CCL2	ENSOART00000010478	0.645291	0	0	0	0	93.5521	1.53228	0	0	0	15.2912	30.8879	8.4049	17.3346	14.1717	88.7862	86.0762	86.529	82.9091	93.8168
CCL17	ENSOART00000000170	15.2582	21.2714	7.92827	7.91572	10.2653	3.59144	15.9559	55.7737	32.5016	24.3887	0.497273	17.8654	0.292304	0	0.821099	1.74264	1.15754	1.18722	2.74509	2.11339
CCL20	ENSOART00000022417	30.9835	31.2153	30.2128	8.30919	15.1933	42.8708	115.483	199.24	146.169	187.758	112.313	58.4772	125.173	204.965	79.0474	74.433	58.6524	29.8709	51.5152	24.3885
CCL22	ENSOART00000000071	0	0	0	0	0	0.482525	0	0	0	0	1.19769	11.0282	1.59706	4.41078	4.72683	7.21518	6.47559	6.47143	10.2076	6.6318
CCL24	ENSOART00000014514	4.59902	5.59795	0.486362	0.497355	0.899954	3.71398	8.092	2.18373	3.80816	4.10136	0.257115	3.40986	0.557905	0.591558	1.74115	180.295	87.5534	216.255	262.982	87.0072
ACKR3	ENSOART00000000323	15.2547	2.94214	0.734361	2.08648	1.18089	40.2416	15.5797	14.5778	5.85812	9.48912	3.88688	3.54781	3.23866	2.56343	2.18288	6.79228	6.19029	6.21414	6.22147	7.32158
Antimicrobial
SBD2	ENSOART00000006999	0	0	0.542271	0	0	92782.6	82271.6	50549.7	44352.3	36091.1	0	0	0	0	0.656406	24062.3	20081.7	21493.4	20024	11695.3

## Sheet: TPMs - all data
	Abomasum organoids					Ileum organoids					Abomasum tissue					Ileum tissue
GeneID	P0	P1	P2	P3	P4	P0	P1	P2	P3	P4	T1	T2	T3	T4	T5	T1	T2	T3	T4	T5
ENSOART00000000006.1	3300.59	3960.57	2572.66	2658.12	2735.32	2476.72	3440.89	3452.66	3378.75	3059.08	4139.45	4045.98	3770.98	2446.23	3249.04	2354.83	2592.45	2924.42	2544.95	2103.06
ENSOART00000000010.1	2530.74	3121.19	2126.62	2127.63	2169.29	1784.89	2448.96	2623.97	2514.11	2238.85	3514.27	3455.71	2864.02	2037.26	2561.8	1644.77	2356.23	2451.64	2174.4	1795.53
ENSOART00000000016.1	12672.8	12525.6	9213.78	9659.55	9177.61	7323.96	8984.31	9362.61	9032.59	8546.56	13864.8	11205.5	9828.42	8302.21	9864.11	8045.1	7636.27	9002.61	7855.79	7327.24
ENSOART00000000019.1	8499.26	8642.18	6940.14	6343.35	6192.76	5311.08	7100.08	7354.07	6364.08	6816.7	8662.48	8449.5	6734.25	5475.64	7239.58	6496.43	6243.9	6934.01	6806.17	5880.74
ENSOART00000000021.1	5768.47	6069.63	4487.87	4268.33	4816.64	3677.27	4979.5	4510.44	5252.39	5001.78	7094.46	6522.94	5649.21	4091.86	5450.34	3868.2	4594.74	5349.79	4533.01	4604.6
ENSOART00000000022.1	7625.94	8077.62	5800.73	5795.86	5865.33	4755.27	6441.83	6216.42	5992.93	5923.44	10219.6	9454.68	8278.42	5703.74	7675.17	6790.62	6950.38	8073.71	7490.2	5943.73
ENSOART00000000023.1	7081.6	7622.28	5783.97	5868.75	5380.76	5023.81	6206.52	5895.21	5566.73	5121.25	12221.5	11023.9	9497.5	7469.75	9927.58	8908.36	8063.51	9224.66	9186.31	7279.96
ENSOART00000000025.1	3006.79	4338.98	2966.66	2677.43	2552.39	2414.52	3174.21	3186.12	2838.66	2395	5506.2	5469.61	4320.44	3178.71	4415.52	3374.57	3635.49	3714.88	3775.64	2765.54
ENSOART00000000027.1	3101.31	4306.29	2833.29	3273.19	3246.34	2508.13	3235.8	2853.98	3166.34	2726.93	4759.05	4607.18	4093.2	2707.32	3777.57	1920.45	2947.89	3277.76	2254.76	2744.2
ENSOART00000000028.1	2926.07	4113.52	3099.97	3290.85	3224.24	2422.46	3179.69	2901.73	2976.98	2517.17	5621.02	5343.52	4492.3	2993.32	4237.88	3154.85	3662.03	3941.75	3204.67	3029.99
ENSOART00000000032.1	1030.3	1480.75	919.046	1120.88	1132.16	876.435	1098.19	915.714	1021	783.867	1685.53	2000.42	1548.37	918.228	1341.43	561.804	1104.67	1058.28	730.504	860.492
ENSOART00000000033.1	1656.03	2290.27	1881.72	2041.43	1962.34	1313.98	1666.03	1528.41	1467	1171.36	3064.81	3650.48	2639.41	1714.26	2438.72	1588.3	1945.12	1794.68	1710.33	1560.03
ENSOART00000000035.1	3820.64	4836.02	3555.11	3617.73	3681.76	2394.91	3418.17	2902.48	3107.52	2703.56	6125.5	5398.87	4877.82	3263.46	4876.88	3166.82	3379.25	4111.68	3556.44	3229.94
ENSOART00000000039.1	47.4533	40.9675	34.5384	36.5734	39.673	37.1681	47.0258	46.5703	44.3611	46.0997	37.064	30.881	30.8825	33.5639	31.2387	66.7181	67.7315	56.9253	70.8381	69.0579
ENSOART00000000038.1	0	0	0	0	0	0	0	0	0	0	0	0	0	0	0	0	0	0	0	0
ENSOART00000000040.1	29.8415	25.54	15.766	19.6446	21.5964	31.9564	29.242	29.6382	28.5428	27.3117	18.4938	14.8678	18.9465	17.7668	18.2656	17.914	20.2865	22.9054	19.0232	26.6619
ENSOART00000000041.1	0	0	0	0	0	0.282817	0	0	0	0	0.699316	0	0	0	0	0	0.0980315	0	0	0.599808
ENSOART00000000044.1	0.473009	0.850863	0.589405	0.704397	0.68871	0.523803	0.874443	0.556623	0.627325	0.449323	4.5465	6.11175	2.30803	4.16481	2.43723	1.1348	1.42876	1.49476	0.971149	2.17318
ENSOART00000000045.1	0	0	0	0	0	0	0	0	0	0	0	0	0	0	0	0	0	0	0	0
ENSOART00000000042.1	16.218	18.0432	9.41648	12.9677	13.9405	6.14628	8.09155	6.83345	9.69605	7.11726	16.567	13.1064	11.4433	7.7116	21.5817	4.01752	7.61672	9.70204	5.84982	13.3306
ENSOART00000000043.1	0	0	0	0	0	0	0	0	0	0	0.0711242	0.119669	0	0.0803079	0.256256	0.313152	0.392446	0.49306	0.300239	0.542281
ENSOART00000000046.1	0	0	0	0	0	0	0	0	0	0	0	0	0	0	0	0	0	0	0	0
ENSOART00000000047.1	0	0	0	0	0	0	0	0	0	0	0.0203779	0	0	0	0	0.117389	0.0233759	0	0.0209228	0
ENSOART00000000048.1	0	0	0	0	0	0	0	0	0	0	0	0	0	0	0	0	0	0	0	0
ENSOART00000000049.1	30.4582	33.9057	24.0873	26.9738	30.638	24.0154	30.192	22.3563	26.314	24.4972	15.0708	12.1745	13.6224	14.254	14.3195	16.469	17.4191	15.4213	16.3211	17.6862
ENSOART00000000052.1	0	0.0972762	0.0745528	0.135504	0.110114	0.557344	0.452922	0.217914	0.615202	0.147135	0	0.00406285	0	0	0	17.6419	14.492	22.398	10.6527	9.35506
ENSOART00000000050.1	0	0	0	0	0	0	0	0	0	0	0	0	0	0	0	0	0	0	0	0
ENSOART00000000053.1	0.0475298	0.160958	0.155255	0.251475	0.032373	0.0929347	0.507626	0.105164	0.110888	0.239958	0.2763	0.341699	0.178022	0.428893	0.136062	0.252171	0.369017	0.357061	0.448597	0.325424
ENSOART00000000054.1	0.775001	0.505654	0.605156	0.628511	0.656308	0.647223	1.07113	0.476713	1.04562	0.690344	1.00034	0.955258	0.656473	0.624195	0.625927	0.53474	1.11977	1.3503	0.973088	0.92244
ENSOART00000000055.1	0.747691	0.591502	0.341316	0.562354	0.817763	0.645014	1.56214	0.495059	0.527657	0.640065	0.571177	0.439747	0.715326	0.677208	0.468083	1.13517	0.904729	1.22077	0.439675	1.66893
ENSOART00000000057.1	0	0	0	0	0	0	0	0	0	0	0	0	0	0	0	0	0	0	0	0
ENSOART00000000058.1	0	0	0	0	0	0	0	0	0	0	0	0.0353214	0.10318	0	0.0246935	0.0306023	0	0	0	0
ENSOART00000000056.1	0.220076	0	0.452133	0	0	0.216536	0.575629	0	0.671831	0	0.179648	0	0	0	0	0.811114	1.33698	0.215331	0.794211	0
ENSOART00000000059.1	0.0852057	0	0	0	0	0.0830323	0	0.214953	0.170692	0	0	0	0	0	0	0	0.027421	0	0.073459	0
ENSOART00000000060.1	29.0679	39.3925	46.0758	47.5982	44.9021	16.8154	30.7604	41.44	46.7631	32.556	88.1315	62.1909	63.1398	73.8814	70.8	45.0248	30.6024	40.206	42.5059	34.5166
ENSOART00000000061.1	2.24527	3.29054	2.79551	2.82984	3.19874	1.9764	4.39022	2.31719	2.41975	1.85461	7.82704	10.1064	6.39209	6.6698	6.29025	6.8028	10.299	14.4627	5.21875	12.8616
ENSOART00000000062.1	0	0	0	0	0	0	0	0	0	0	0	52.566	93.0018	109.636	6.98057	0	325.563	846.19	381.093	41.3302
ENSOART00000000063.1	0	0	0	0	0	0	0	0	0	0	0	0	0	0	0	0	0.0104803	0	0	0
ENSOART00000000064.1	0	0	0	0	0	0	0	0	0	0	0	0	0.0216255	0	0	0	0	0	0	0
ENSOART00000000065.1	0	0	0	0	0	0	0	0	0	0	0	0	0	0	0	0	0	0	0.0515652	0
ENSOART00000000066.1	0	0	0	0	0	0	0	0	0	0	0	0	0	0	0	0	0	0	0	0
ENSOART00000000071.1	0	0	0	0	0	0.482525	0	0	0	0	1.19769	11.0282	1.59706	4.41078	4.72683	7.21518	6.47559	6.47143	10.2076	6.6318
ENSOART00000000068.1	0.301878	0	0.618147	0	0	0.113895	0.20035	0.378566	0.0880227	0	0.612858	0.627283	0.846468	1.26568	0.451563	0.182665	0.446337	1.00806	0.797496	0.311919
ENSOART00000000076.1	19.0381	7.02279	6.37497	8.23786	9.63401	14.2912	13.6959	14.5498	17.1168	17.474	6.19973	5.87352	5.86009	6.52857	7.08837	13.7082	13.9251	13.5714	12.704	15.3116
ENSOART00000000067.1	6.99328	4.11927	2.01385	3.72161	4.67832	5.54444	6.03824	4.09596	4.8768	5.23064	2.60899	2.3157	3.55405	2.26341	2.59255	3.1004	2.36196	3.16421	2.834	4.87025
ENSOART00000000070.1	42.789	30.0167	24.3827	26.5544	23.4165	48.1779	40.3661	33.2886	41.6562	40.5348	14.2332	15.1055	10.783	12.7375	16.9522	34.0563	52.2666	20.9075	32.608	60.5579
ENSOART00000000069.1	0.368282	0.370269	0.234669	0.30183	0.29694	0.485944	0.611766	0.4191	0.385272	0.29558	0.907016	0.804069	0.730047	0.705297	0.678834	0.957037	1.30676	2.01174	0.886295	1.48725
ENSOART00000000073.1	3.12131	2.10006	2.83341	2.64569	8.78951	5.12673	5.28698	3.79081	10.8809	9.16369	2.91839	2.55163	3.96308	4.11047	5.77331	8.4813	7.19702	8.85832	5.10869	7.56465
ENSOART00000000072.1	0	0	0.0371564	0.0371806	0	0.92443	0.990659	1.13452	7.08706	2.23065	5.17455	9.04074	1.54275	6.05522	5.59147	260.035	104.174	304.84	142.202	170.818
ENSOART00000000074.1	0	1.39507	0	0	0	0	0	0	0	0	0	0	0.916104	0	0	30.7245	11.4941	21.7737	5.61449	7.5628
ENSOART00000000075.1	9.32409	2.56866	0.954729	1.75822	2.1163	10.7722	4.38979	10.6843	7.74576	11.5658	0.2721	0.151056	0.0737619	0.36826	0.0707295	0.436737	0.232347	0.375923	0.623804	0.61793
ENSOART00000000077.1	0.313217	0	0	0.0963185	0.192485	0.116653	0	0.236024	0.682446	0.235429	0.129705	0.688952	0.15446	0	0.344896	0.308035	0.18151	0.34031	0.0847618	0.223093
ENSOART00000000078.1	0	0	0	0	0	0	0	0	0	0	0	0	0	0	0	0	0.124679	0.121041	0.111349	0.527175
ENSOART00000000079.1	0	0	0	0	0	0.181118	0.321744	0	1.12236	0.517863	0	0	0	0	0	0	0	0	0	0
ENSOART00000000080.1	0	0	0	0	0	0	0	0	0	0	0	0	0	0	0.0818228	0	0	0	0	0
ENSOART00000000081.1	107.672	57.0836	53.5903	64.5229	113.923	86.853	96.5826	84.6691	159.303	152.708	50.6807	44.4001	58.5169	65.4602	68.6851	164.918	119.132	113.293	130.351	101.437
ENSOART00000000106.1	0.230289	0	0	0	0.00730523	0.631773	0.676662	0.373184	0.113408	0.107462	1.78995	1.35928	1.57666	1.2084	1.37588	1.54012	1.86554	3.45922	1.69466	2.17138
ENSOART00000000082.1	197.858	82.4087	73.006	109.295	153.384	119.452	298.51	283.013	399.979	178.345	4.29606	2.84348	1.10768	2.98471	9.10514	18.9947	13.7026	12.1349	16.8902	16.0264
ENSOART00000000089.1	6.17201	3.94565	2.84547	4.14954	4.76031	6.959	8.83677	6.57169	7.96752	7.05025	2.91782	3.08693	2.08194	2.57278	2.28867	3.93559	5.49056	3.56974	4.66592	5.00038
ENSOART00000000083.1	7.70717	7.965	6.85436	7.41679	7.09035	8.16888	10.3454	9.36695	10.3307	8.17482	4.13895	4.659	3.62537	3.4101	4.99722	6.99993	10.7186	7.21834	6.54918	14.7237
ENSOART00000000085.1	45.0115	39.8071	27.7468	31.6543	34.6427	31.769	34.2195	32.5072	36.641	37.555	33.5631	23.7377	27.2079	31.4354	33.0696	20.5468	21.65	28.0964	22.7725	25.5423
ENSOART00000000084.1	0.0287509	0.0550101	0.015207	0.0474949	0.0244543	0.126446	0.127053	0.351561	0.147528	0.0596427	0.0237992	0.139743	0.00956978	0.0258045	0.0138088	0.776515	0.881728	1.52811	0.451033	0.4643
ENSOART00000000086.1	0	0	0	0	0	0	0	0	0	0	0	0	0	0.0544245	0	0.141777	0	0	0	0
ENSOART00000000090.1	0.628046	0.325545	0.152622	0.293465	0.176697	6.60186	3.65253	2.58592	1.89011	2.48659	1.28013	1.85425	1.37405	1.35367	1.88948	1.24199	1.98817	2.50167	1.88254	2.90277
ENSOART00000000087.1	0	0	0	0	0	0	0	0	0	0	0	0	0	0	0	0	0	0	0	0
ENSOART00000000088.1	32.1943	17.8587	19.447	19.5076	14.4389	53.2204	42.618	45.2776	27.2525	16.4511	23.2262	20.9309	16.0335	18.607	20.9298	35.4678	53.1737	47.8291	48.9023	60.6615
ENSOART00000000091.1	0	0	0	0	0	0	0	0	0	0	0	0	0	0	0	0	0	0	0	0
ENSOART00000000107.1	11.2946	10.0177	7.5546	11.3469	11.0637	14.7083	17.5855	13.9511	16.1814	13.6162	7.09374	7.45351	6.56233	6.58481	7.27807	17.9411	21.4092	15.8278	17.4936	22.7138
ENSOART00000000098.1	26.7439	21.0063	17.3882	21.5783	24.6303	21.6827	27.1168	23.6019	28.4458	28.9543	18.0581	15.8248	17.1753	17.3531	16.3145	39.0221	54.7109	31.5123	56.9162	58.516
ENSOART00000000092.1	0	0	0	0	0	0	0	0	0	0	0	0	0	0	0	0	0	0	0	0
ENSOART00000000094.1	62.3927	50.0228	44.1649	59.0223	51.9101	76.2266	48.3804	66.7272	53.6484	52.3233	61.8491	45.0342	56.5232	82.4268	67.6147	92.3773	64.1378	78.5468	71.075	64.3332
ENSOART00000000095.1	0	0	0	0	0	89.2384	116.062	79.7231	103.029	73.5449	0	0.0387279	0.0761019	0.103358	0	177.499	71.4942	67.7435	90.0423	30.192
ENSOART00000000093.1	1.27488	3.49525	2.64563	3.1579	4.18393	0.586999	1.06571	0.816121	0.960647	1.04845	0.837798	1.02544	0.931966	1.02397	0.687351	1.02256	1.56782	1.11964	1.02984	1.5937
ENSOART00000000101.1	1526.52	1483.98	1242.72	1437.26	1386	1204.61	1188.34	1171.03	1172.03	1155.47	413.342	322.417	331.569	360.885	308.707	625.09	680.18	541.707	732.328	771.301
ENSOART00000000096.1	26.345	34.8245	19.9284	24.968	28.3576	34.6571	46.1868	36.0011	42.4408	37.3019	14.9653	12.9043	12.7852	15.2698	16.7148	19.7575	29.1048	27.0525	28.0132	41.7026
ENSOART00000000097.1	26.9515	7.6808	3.42364	6.43732	4.32811	1.20929	0.539368	0.869804	1.14145	1.04932	63.4526	62.1677	60.7186	78.5441	75.3148	0.0355087	0.0660478	0.0832813	0.075999	0.126028
ENSOART00000000099.1	0	0	0	0	0	0	0	0	0	0	0	0	0	0	0	0	0	0	0	0
ENSOART00000000108.1	17.9156	14.3723	11.2529	14.4762	16.7657	15.9203	25.9815	14.5502	21.8035	18.9923	10.785	10.5177	11.0969	10.4578	11.6517	15.9945	21.1517	17.5468	20.851	25.1528
ENSOART00000000113.1	0	0	1.40615e-05	0	0	0	0	0	0	0	0	0	0	0.69791	0	9.17912e-08	0	1.38704e-10	2.58406e-10	0
ENSOART00000000102.1	39.6783	36.3777	26.9036	27.1583	29.9816	24.4948	33.0072	29.1595	28.715	28.3379	22.98	18.0242	18.7651	21.4728	20.6575	37.9144	42.007	36.8931	42.0105	45.0094
ENSOART00000000100.1	0	0	0	0	0.167059	0.321059	0	0	0	0	261.57	300.151	238.453	251.876	381.004	216.163	537.426	117.465	183.963	296.043
ENSOART00000000109.1	0	0	0	0	0	0	0	0	0	0	0	0	0	0	0	0	0	0	0	0
ENSOART00000000103.1	42.5623	47.2645	36.9238	38.0908	37.469	33.2791	35.9924	38.5371	34.027	32.2461	29.9604	22.6086	23.0882	23.1418	24.0644	58.1015	45.7784	70.3722	62.1387	49.291
ENSOART00000000104.1	0	0	0	0	0	0	0.214212	1.09011	0.992309	0.256937	0	0	0	0	0.123146	0	0	0	0	0
ENSOART00000000105.1	0.436145	0.0854332	0.0911306	0.182843	0.0365687	0	0.0755201	0	0.352484	0	0.852803	1.2524	1.97336	0.5288	1.7232	7.55218	6.804	17.3447	3.87536	5.02846
ENSOART00000000112.1	31.2447	19.6327	12.0224	14.3843	14.3253	23.7638	25.159	15.1133	21.4557	23.9972	3.82129	3.40059	3.15752	4.28676	3.62975	11.5136	20.3506	8.85261	20.2079	24.7975
ENSOART00000000110.1	0	0	0	0	0	0	0	0	0	0	0	0	0	0	0	0	0	0	0.0304713	0
ENSOART00000000111.1	0	0	0	0	0	0	0	0	0	0	0	0	0	0	0	0	0	0	0	0
ENSOART00000000115.1	15.2438	8.25451	5.37426	8.33471	8.42246	5.46752	10.8323	4.86225	7.68122	9.7701	5.20051	3.48412	5.01754	4.67916	3.0374	3.90038	9.96024	2.63488	9.50396	9.71555
ENSOART00000000119.1	4.62705	2.5673	2.0493	1.92821	2.47999	3.87097	3.96286	5.29623	3.70169	3.55173	5.92376	4.88186	5.28421	5.58522	5.31167	7.59135	7.88769	12.7345	6.54316	7.14627
ENSOART00000000114.1	18.1606	14.2498	12.2441	10.0649	11.6971	14.6853	14.8589	32.565	21.6487	9.43853	12.3886	9.76803	10.2816	9.69192	9.63112	18.7946	25.6728	17.2296	28.3566	19.6791
ENSOART00000000116.1	0.379806	0	0	0.0991951	0.233994	0.0925857	0.0820376	0.239432	0.0951497	0	0.542605	0.26154	0.195225	0.702621	0.654296	0	0.367772	0	0.411182	0.393928
ENSOART00000000118.1	17.7315	19.2903	13.1878	12.4578	13.0254	17.695	17.852	18.7734	16.0484	16.1285	13.2725	10.221	10.3337	10.7827	8.30395	14.1284	14.3855	16.1275	15.3245	13.006
ENSOART00000000120.1	2.70756	2.01894	0.199785	0.113064	0.116701	92.0165	89.3579	72.9696	93.7758	86.9973	16.4282	29.0145	14.7446	45.8524	13.3484	75.6324	82.3277	55.9801	68.8849	80.2664
ENSOART00000000117.1	2.35609	2.47573	1.48639	1.19721	2.1219	2.06715	4.04325	3.19568	4.05604	3.46508	2.06908	1.60159	0.913271	1.99788	2.1824	2.21015	2.53238	2.82321	2.73318	4.13857
ENSOART00000000122.1	0	0	0	0.0149859	0	0	0	0	0.014512	0	0	0	0	0.0130764	0	0	0	0.0266902	0	0
ENSOART00000000125.1	7.61482	5.70805	3.80137	4.86621	4.47922	12.4485	9.44923	9.63083	7.87026	7.70194	14.4719	13.3974	11.4694	10.1927	11.3784	12.6807	18.826	25.1831	16.3038	21.5219
ENSOART00000000121.1	25.9448	15.4286	10.9619	15.1971	15.1312	9.02983	10.2862	11.9844	10.2491	7.97115	7.39285	9.4559	10.585	4.94079	6.85337	3.0703	4.15886	2.81089	2.30436	3.57811
ENSOART00000000123.1	0.257369	0.0504384	0.0271292	0.0541453	0.0218148	0.450982	0.0223609	0.0658788	0.104666	0.0537604	9.22515	8.61492	7.08644	7.45382	10.5005	21.3261	27.9642	36.784	25.6533	27.5832
ENSOART00000000124.1	9.62124	10.7218	7.43418	6.56213	9.99194	8.01724	9.76249	15.5393	12.2051	11.9608	8.54537	9.44148	5.42173	8.84628	9.08377	10.4586	12.8183	17.6993	11.3916	14.5122
ENSOART00000000126.1	1.12917	0.370921	0.24691	0.297553	0.475457	2.137	1.09614	1.84875	2.3743	1.65715	2.09342	0.513047	0.0409024	0.747925	1.16762	1.87065	1.50515	0	0.847584	0.79822
ENSOART00000000127.1	0.204139	0.145527	0.0196338	0	0.0157984	0.0722996	0.0161469	0.142835	0	0.0582754	0.356843	0.231906	0.25045	0.631481	0.538809	0.156162	0.159783	0.104512	0.0476773	0.0397938
ENSOART00000000128.1	4.27938	7.51742	4.87511	4.31017	4.56503	2.23424	9.62391	13.027	11.3112	13.1212	5.8994	5.82498	4.38904	5.14796	4.90223	8.64413	7.58169	7.48723	8.29694	10.1762
ENSOART00000000129.1	0	0	0	0	0	0	0	0	0	0	0	0	0	0	0	0.017508	0	0	0	0
ENSOART00000000131.1	91.346	100.141	76.0346	88.8607	98.9949	110.955	102.179	132.215	127.732	124.517	65.4358	61.7075	60.5885	57.529	61.0985	67.0105	94.244	116.095	81.9192	94.8575
ENSOART00000000130.1	0.0741684	0.144476	0.0782161	0.077905	0	0.0360177	0.0967606	0	0.0751168	0.0765157	0	0	0	0	0.0354681	0.0435237	0.0346959	0.0343856	0	0.31376
ENSOART00000000133.1	0.858707	0.140063	0.0740514	0.224298	0.11861	0.487858	0.864407	0.72402	0.646073	0.148177	1.46817	0.59019	0	0.197612	0.56003	1.45664	1.12394	0	0.861105	0.745917
ENSOART00000000132.1	21.8654	26.2454	22.5449	20.7725	28.2966	22.9435	29.1547	29.8174	32.1875	26.969	22.1003	17.3523	15.9482	21.5022	17.8218	45.1836	43.7686	42.9317	45.235	43.6472
ENSOART00000000134.1	491.474	576.589	605.781	618.549	619.927	438.482	431.459	458.254	455.884	507.043	282.415	237.598	226.968	216.314	246.828	304.875	291.956	286.715	279.469	312.807
ENSOART00000000135.1	0	0	0	0	0	0	0	0	0	0	0.0505904	0	0.0101932	0	0.0146109	0.2362	0.447998	0	0.439874	0.71417
ENSOART00000000139.1	0.610561	0.396067	0.246867	0.309487	0.423293	0.00480093	0	0.00634868	0	0.00776917	1.14985	0.583399	0.572965	0.480274	1.33497	0.0148311	0.0196225	0.0462335	0.0149723	0.0319885
ENSOART00000000136.1	1.06568	3.99014	5.00631	7.73343	10.4196	0.365961	0.378984	0.23807	1.76363	0.389535	1.90888	1.81135	1.57082	3.16997	2.44716	313.907	154.614	376.243	125.593	104.355
ENSOART00000000138.1	0.0479556	0	0	0	0	0.466897	0.125039	0	0.0243929	0	1.1801	1.72892	1.06795	0.925973	1.34729	1.4977	2.72222	2.81281	2.19701	2.4598
ENSOART00000000137.1	10.6541	7.50902	6.12033	7.57477	8.23521	6.58017	7.45168	7.68589	7.04669	7.27322	6.47544	4.75157	4.74263	4.1927	5.52519	6.48996	6.51992	8.38077	5.73289	9.24169
ENSOART00000000142.1	35.708	36.4697	26.7634	33.063	32.472	32.3471	30.5329	30.3093	33.0114	29.0415	22.2643	20.066	18.7317	20.8856	20.4481	33.8583	39.9945	44.4017	40.2478	41.4954
ENSOART00000000140.1	0	0	0	0	0.0417762	0	0	0	0.0503827	0	0	0	0	0	0	0	0.0320642	0	0	0.108161
ENSOART00000000141.1	4.25996	2.29575	2.24419	2.54819	2.88707	2.53989	3.21483	2.65716	4.11324	3.78079	2.6845	3.11764	2.22806	1.95828	3.01936	3.67651	4.64464	3.07315	2.94108	3.86319
ENSOART00000000143.1	0	0.0230679	0	0	0.0199783	0	0.0409206	0.0602949	0.0718506	0.0492024	0	0	0.0476546	0.0432877	0.0228022	0.0848299	0.150134	0	0	0.100643
ENSOART00000000144.1	0.166847	0.190721	0.175688	0.175441	0.141245	0.216534	0.0966014	0.177833	0.0282517	0.145124	0.856947	0.597117	0.656847	0.255651	0.593105	0.868003	0.75383	0.835024	0.809609	0.948697
ENSOART00000000145.1	0	0.163946	0.428305	0.359911	0.471123	0	0.615841	0.403728	0.362665	0.147658	0.171259	0	0	0.0902235	0	0.161386	0.21375	0	0	0.737001
ENSOART00000000146.1	1.3327	1.99168	2.80953	4.37093	1.72018	2.0067	2.36906	0.856761	4.33785	7.23121	4.33183	5.53588	3.54044	1.31827	3.58192	0.870544	6.44921	4.88777	10.2316	4.41967
ENSOART00000000149.1	319.156	195.807	98.821	165.541	146.734	290.44	282.912	360.044	340.061	405.399	146.855	89.5108	110.049	131.901	76.52	265.774	248.22	279.325	309.291	229.781
ENSOART00000000147.1	0.695727	0.454131	0.276473	0.578614	0.544382	1.35266	1.95417	0.634564	0.590393	0.604231	2.08673	2.26179	2.41186	1.11221	1.07954	1.62098	2.89807	2.43518	1.29225	3.69326
ENSOART00000000148.1	0	0	0	0	0	0	0	0	0	0	0	0	0.0334173	0	0	0	0	0	0	0
ENSOART00000000150.1	0.183767	0	0	0	0	0.0895664	0	0	0	0	2.09904	1.51677	3.89458	3.13869	4.87147	0.330709	0.918215	0.867798	0.794118	1.9072
ENSOART00000000152.1	0	0	0	0	0	0	0	0	0	0	0.0187359	0	0.114512	0	0	0.0311605	0.0152079	0.0403715	0.0391617	0
ENSOART00000000154.1	5.10247	3.6332	3.00931	3.82339	3.94283	3.8062	5.55589	3.54479	4.64536	3.80695	4.03714	4.09693	3.64452	4.21895	3.8962	4.19397	4.98053	5.44577	4.35303	5.40122
ENSOART00000000151.1	0.378882	0	0	0	0.459807	0.185239	0	0	0.379919	0	0	0	0	0	0.382646	0	0.0629294	0	0.169253	0
ENSOART00000000153.1	0	0	0	0	0	0	0	0	0	0	0	0	0	0	0	0	0	0	0	0
ENSOART00000000157.1	0	0	0	0	0	0	0	0	0	0	0	0.0139887	0	0	0.0195142	0	0.00654271	0.0189192	0	0
ENSOART00000000163.1	16.0711	12.1461	8.25375	9.34775	9.2962	12.2883	16.9087	10.3539	11.9731	12.125	6.4034	5.20507	4.81216	5.06485	6.0884	12.8182	16.312	16.0672	16.4727	20.5106
ENSOART00000000165.1	0.215655	0.182452	0.112306	0.129024	0.171765	0.204237	0.274763	0.160652	0.231902	0.174979	0.305601	0.202431	0.213082	0.175323	0.219156	0.286268	0.403025	0.333554	0.226393	0.567492
ENSOART00000000155.1	10.1566	9.32709	5.27837	6.33773	6.42896	10.7119	12.3863	15.093	12.991	14.3013	6.94674	6.10407	8.32321	17.963	12.9963	24.168	23.1597	17.2356	20.2532	19.6225
ENSOART00000000156.1	4.13726	2.3903	1.64708	2.45755	2.58659	0.927429	2.24966	1.96613	3.00016	2.66103	2.27423	1.52943	1.42016	1.22695	1.67444	1.43402	3.03205	2.26878	2.57111	5.30101
ENSOART00000000158.1	27.6476	23.0483	13.1636	12.5001	10.2173	3.35274	10.3254	3.53058	5.39759	2.77184	33.3922	39.9154	35.5109	24.695	40.3853	10.8826	3.32038	10.7515	5.12829	3.84248
ENSOART00000000164.1	36.3484	26.786	21.0981	23.153	25.2393	23.4556	22.9723	21.1129	23.1783	23.0275	35.6697	26.6707	29.2211	38.5899	29.195	73.8991	97.8792	54.7553	105.465	142.683
ENSOART00000000162.1	104.881	67.1267	52.1562	59.9871	74.2062	84.4579	91.6157	99.773	108.054	120.502	41.4488	31.4091	30.6807	39.3485	39.5842	100.577	111.426	76.6921	104.621	109.293
ENSOART00000000161.1	0	0	0	0	0	0.71872	0.0306014	0	0	0	3.88685	3.5904	4.36031	4.32944	4.56033	9.88946	9.85156	19.5415	12.3527	15.1512
ENSOART00000000160.1	7.78709	2.41336	2.24325	3.30942	3.06474	3.84053	3.65656	4.28637	3.07932	3.83277	5.25185	3.22303	4.36311	5.43061	4.16642	0.433064	0.0510688	0.413344	0.154284	0.428865
ENSOART00000000159.1	0.0278749	0.0819342	0	0	0.0235965	0.0542637	0.0484164	0	0.0283191	0.116376	0	0	0	0	0	0.133859	0.248218	0.470831	0.0716081	0
ENSOART00000000169.1	53.4034	51.9883	36.957	44.8971	43.2757	41.0557	40.0516	44.7507	45.1595	47.027	34.435	27.1648	19.9034	28.0424	27.84	49.9639	55.4158	49.8451	50.9904	61.4553
ENSOART00000000171.1	0	0	0	0	0	2.11483e-08	0.0190172	1.84383e-06	0	2.40988e-07	0	0	0	0	0	0	0.142885	0	0	0
ENSOART00000000168.1	0.748382	0.090435	0.104594	0.166047	0.217164	0.0351298	0.273883	0.177041	0.252311	0.203168	0.111382	0.380969	0.281256	0.27338	0.253565	0.11081	0.133376	0.0543932	0.281289	0.285494
ENSOART00000000167.1	5.87507	4.98596	3.30955	4.41769	4.47786	6.93987	5.8392	4.91819	4.86876	4.78789	2.08207	2.09277	1.87816	1.82829	1.91828	2.01695	3.64495	3.20045	3.56042	4.85409
ENSOART00000000166.1	0	0	0	0	0	0	0.028752	0	0	0	0	0	0	0	0	0	0	0	0.0283782	0
ENSOART00000000170.1	15.2582	21.2714	7.92827	7.91572	10.2653	3.59144	15.9559	55.7737	32.5016	24.3887	0.497273	17.8654	0.292304	0	0.821099	1.74264	1.15754	1.18722	2.74509	2.11339
ENSOART00000000173.1	0	0	0	0	0	0	0	0	0	0	0	0	0	0	0	0	0	0	0	0
ENSOART00000000175.1	2.84248	1.33	1.18855	1.51511	2.16874	2.24071	4.72215	3.47206	3.19759	1.84053	1.15743	2.76361	1.31161	0.830571	3.22251	0.34666	2.7159	3.18286	2.38266	1.85955
ENSOART00000000174.1	0.0805833	0	0	0	0.0274806	0.0941977	0.126265	0.04138	0.131525	0.0506466	0.0269744	0	0.0108746	0	0.109132	0.0775223	0.0873657	0.151279	0.0552075	0.138441
ENSOART00000000176.1	1742.06	1168.43	687.477	766.24	717.975	1130.4	998.785	1195.29	1077.18	1308.89	752.953	480.915	510.057	596.08	528.188	889.228	903.287	745.646	851.337	776.774
ENSOART00000000177.1	0.0677099	0.0249006	0.036003	0.116104	0.065245	0.115486	0.0147577	0.0326759	0.0519416	0.0355465	0.447616	0.512453	0.902189	0.506124	0.531405	0.0916988	0.15112	0.135082	0.0797336	0.109566
ENSOART00000000178.1	0.153831	0.0855618	0	0	0.037464	0.106046	0.0189582	0.111928	0.0667026	0.0454974	0.0552848	0.0299215	0.0292815	0.0399095	0.0426806	0.0525863	0.112396	0.0406059	0	0.0934032
ENSOART00000000181.1	0.0109199	0.0481968	0.0348921	0.0345875	0.0515371	0.0532253	0.152414	0.0773645	0.0838569	0.0401663	0.142261	0.171117	0.184168	0.145685	0.179214	0.197266	0.36031	0.30758	0.16834	0.424869
ENSOART00000000180.1	0	0	0	0	0	0	0	0	0	0	0	0	0	0	0	0	0	0	0	0
ENSOART00000000179.1	4.82719	0.974773	0.622218	1.19869	1.04005	6.34039	4.3046	3.85454	5.86988	6.92171	8.06034	3.43062	4.87682	16.6009	7.02626	24.075	16.0926	12.7493	13.0836	24.8289
ENSOART00000000182.1	29.1813	19.1899	13.4931	17.6293	16.0891	32.547	25.5546	28.1201	26.1306	28.2486	9.23804	7.72237	8.10502	9.74663	9.36813	17.5087	18.5048	15.5995	20.2102	21.9519
ENSOART00000000189.1	0.0782307	0	0.0151368	0	0	0.0138642	0.0558176	0	0.00727766	0.00747032	1.18275	1.22292	1.92876	1.44604	2.54799	0.976182	0.748277	1.00823	0.730897	0.644996
ENSOART00000000194.1	0	0.0241983	0	0	0	0	0	0	0	0	0.0617792	0	0	0	0.0865725	0	0	0	0	0
ENSOART00000000195.1	0	0	0	0.0357711	0.0287291	0	0	0	0.0345256	0	0	0.070679	0	0.0626268	0.0126199	0.0817199	0.0217299	0.0319641	0	0.072345
ENSOART00000000184.1	0	0	0	0	0	0.0396657	0	0	0	0.0449866	0.0302627	0.0503308	0.0259632	0	0	0	0.0699252	0	0.0305661	0.0845202
ENSOART00000000183.1	37.548	34.8295	42.0286	35.1814	32.844	44.6684	58.9239	38.6987	45.5762	43.7119	27.1749	32.6996	34.2432	27.4574	35.0666	29.4943	34.5725	33.0998	35.0501	35.6527
ENSOART00000000185.1	0	0	0	0	0	0.104457	0	0	0	0	0	0	0	0	0	0	0	0	0	0
ENSOART00000000186.1	2.57474	0	6.11072	0	3.24549	1.1806	1.52238	0	2.01526	3.20782	0	1.65978	3.77811	1.73895	5.89695	4.68336	3.58268	7.78088	8.21289	0
ENSOART00000000187.1	0.166844	0.327143	0	0.174567	0	0.488343	0.864201	0.835199	2.00324	1.5562	0.270295	0	0.354087	0.312169	0.333854	2.22332	1.04621	1.27874	0.590742	0.687807
ENSOART00000000188.1	0	0	0	0	0.0251442	0.144701	0	0	0.0603817	0	0.717681	1.64704	0.662287	1.36681	0.951706	6.3172	10.6409	6.97573	10.2871	12.033
ENSOART00000000197.1	0.44646	0.334535	0.58119	0.524832	0.489569	0.434608	0.593193	0.840158	0.587309	0.493643	0.744164	0.764321	0.407641	1.13484	0.559977	2.30213	2.0855	3.47496	1.50675	2.18597
ENSOART00000000199.1	0	0	0	0	0	0	0	0	0	0	0	0	0	0	0	0	0	0	0	0
ENSOART00000000190.1	249.33	680.436	1340.78	1428.46	1214.51	180.913	234.017	127.225	169.996	148.258	1768.09	1815.84	1171.02	2026	1544.54	204.136	97.0287	98.6052	189.725	77.7537
ENSOART00000000201.1	45.8065	40.0202	24.8286	34.6076	35.6014	47.9695	53.6019	42.1125	51.2668	50.513	15.9227	15.0023	14.53	15.7587	16.7438	23.1745	32.0953	30.0614	30.4465	45.5907
ENSOART00000000191.1	0.155182	0.323223	0.328212	0.367704	0.659821	1.32294	1.17791	0.828942	0.86854	0.608961	1.70825	0.900965	0.639491	0.749222	0.807339	2.04157	2.359	1.74963	1.52091	3.88732
ENSOART00000000193.1	0	0	0	0	0	0.225316	0.332611	0.194687	0.231737	0.15959	1.57858	1.00701	1.78283	1.42032	1.4341	0.923767	1.50912	3.70475	1.59261	3.04988
ENSOART00000000192.1	1.43337	3.58171	3.79717	2.34754	1.86006	5.72538	8.33992	2.77596	6.22954	4.65471	2.92967	4.36746	3.80972	4.97045	3.07898	3.77816	6.94644	6.00488	2.05397	7.97544
ENSOART00000000200.1	12.3339	9.95431	6.77423	11.5855	7.69957	1.00829	0.260995	1.02431	0.406663	0.522477	25.6121	46.2885	39.778	41.665	41.685	17.2416	28.0304	24.7781	26.9638	33.0285
ENSOART00000000196.1	3.26104	3.19792	2.26754	2.94013	2.77756	3.29513	4.477	2.33964	3.07574	3.36091	2.2456	2.21317	1.80544	2.06835	2.29286	3.61855	4.82087	4.33961	4.11564	6.28502
ENSOART00000000222.1	7.31763	9.96706	7.41455	8.88357	9.23249	8.7183	10.6306	11.9641	12.4815	12.5078	6.9441	6.99187	7.08185	7.74394	6.27062	7.63861	5.6729	9.34621	6.31791	6.96085
ENSOART00000000205.1	28.5625	23.6368	13.018	17.5555	16.8435	22.4189	27.0394	20.2696	24.2502	24.9523	14.6437	12.3571	12.6342	13.2165	13.1362	17.4159	21.3629	22.5412	20.8139	29.1965
ENSOART00000000198.1	7.38321	4.39986	5.80856	8.07193	11.5599	7.2951	4.63765	7.11805	12.2511	8.77812	16.5849	13.1418	16.7712	20.7884	16.0509	11.0964	11.0016	6.81729	8.66336	5.04543
ENSOART00000000206.1	28.3205	26.8157	28.8316	30.7379	37.631	43.9883	50.0452	51.9254	64.6415	53.5324	44.4753	27.5956	34.9464	34.2596	39.5616	110.546	39.6112	87.8566	59.3203	50.0549
ENSOART00000000211.1	11.8733	11.1845	7.33172	8.95019	8.98012	10.2617	11.1297	10.5355	12.301	12.0302	7.23637	6.73944	5.72837	5.81667	7.32229	6.9637	8.86277	8.70422	8.14725	12.7416
ENSOART00000000216.1	0	0	0	0	0	0	0	0	0.0640321	0.0712006	0	0.050481	0	0	0	0	0	0	0.0676317	0
ENSOART00000000203.1	0	0	0	0	0	0	0	0	0	0	0	0.0118615	0	0.0157082	0	0	0.0163389	0.0160315	0	0.0733132
ENSOART00000000202.1	0	0	0	0	0	18.9542	3.66095	0	4.27242	0.259268	13.6806	4.34142	7.51096	23.1386	4.76834	616.062	550.608	437.259	397.251	298.907
ENSOART00000000204.1	0.709084	1.49254	1.99265	2.1822	3.9388	2.22417	5.93193	3.09178	3.09672	2.98928	4.22423	2.34756	2.05593	1.85921	3.02896	4.47812	4.79916	3.30245	4.11545	3.69934
ENSOART00000000207.1	8.97992	7.13341	4.37112	6.15273	5.58182	11.3937	11.8919	10.8642	10.3509	9.75831	3.80397	3.50605	3.23994	3.25776	2.90102	5.56127	10.0904	7.49447	9.19145	13.2331
ENSOART00000000208.1	0	0	0	0	0	0	0	0	0	0	0.654467	1.00989	0.537098	0.464041	0.296652	8.80455	8.83934	9.37135	3.5363	4.84525
ENSOART00000000209.1	0.0809856	0.184973	0.35317	0.207421	0.440392	0.0876457	0.359374	0.093683	0.275596	0.152768	0.280978	0.474448	0.157905	0.361481	0.380174	0.296061	0.540381	0.470635	0.485226	1.00337
ENSOART00000000210.1	0	0	0	0	0.02641	0	0	0	0	0	0	0	0	0	0	0	0	0	0	0
ENSOART00000000213.1	52.9069	34.1243	22.0506	27.0471	25.672	29.3751	37.8776	38.2927	34.8658	45.1852	24.3031	14.4464	18.8803	22.5708	20.7939	26.5712	28.9686	21.5327	31.825	29.7502
ENSOART00000000214.1	0.419861	0.342884	0.221559	0.490939	0.475194	0	0.0608269	0.627398	0.284818	0.0731392	15.2783	10.9179	11.7269	8.23595	13.4438	0	0	0	0	0.0498717
ENSOART00000000212.1	0.792598	0.283038	0.633511	0.857702	1.24074	1.48767	1.57063	0.760698	1.82589	1.54187	1.40978	1.87586	2.26493	1.88035	2.71721	2.64585	5.04131	4.68644	2.22846	4.82351
ENSOART00000000215.1	0.173718	0.113414	0	0.0605713	0	0	0.400237	0.220085	0.0582474	0.120032	0.859167	0.677748	1.09729	0.904605	0.790432	1.3173	0.703388	0.59806	1.19122	0.242731
ENSOART00000000217.1	0	0	0	0	0	0	0	0	0	0	0	0	0	0	0	0.0173233	0	0	0	0
ENSOART00000000219.1	0	0	0	0	0	0	0	0	0	0	0	0	0	0	0	0	0	0	0	0
ENSOART00000000218.1	0	0	0	0	0	0	0.348604	0	0	0	0.335331	0	0	0	0.422802	0.497206	0.276284	1.21273	0	0
ENSOART00000000220.1	3.62601	3.54407	4.18647	4.16561	4.56493	3.27006	4.26903	3.76305	4.61628	3.72188	4.77816	4.11699	3.41817	4.02134	4.45465	3.78236	3.62182	4.12081	3.79015	4.72835
ENSOART00000000221.1	5.5809	3.50226	3.54903	3.9705	5.67787	4.61807	5.46613	5.28556	6.0406	5.86597	3.99277	3.87115	4.63603	4.64503	5.5756	7.96357	8.80021	6.3847	7.40291	10.2895
ENSOART00000000223.1	1.48803	1.30723	0.516026	1.20043	0.970228	1.41466	1.96176	1.17074	1.68452	0.916921	1.71872	1.64639	1.56076	1.48457	1.77653	2.11138	2.94197	2.73658	2.44526	3.66866
ENSOART00000000224.1	0.17934	0.182679	0	0	0.102107	0	0.141248	0	0.0622397	0.131461	0	0.0431962	0.125912	0.11646	0.18151	0.303598	0.198008	0.140197	0	0
ENSOART00000000225.1	0	0	0.0709594	0.204668	0	0.193595	0.0761715	0.0809692	0	0	0	0	0	0	0	0	0	0.150354	0.116166	0.140566
ENSOART00000000230.1	7.79953	8.61439	7.00083	7.60441	7.28699	7.59914	10.4511	9.19935	8.90337	7.8555	5.56265	5.06941	4.88459	4.96676	5.23345	10.5215	11.9629	12.4404	12.1029	15.2291
ENSOART00000000226.1	0	0	0	0	0	0.103174	0	0.399463	0	0.109499	0	0.145705	0	0	0	0	0.0342308	0	0.0917347	0
ENSOART00000000243.1	0.256395	0.362449	0.413824	0.539409	0.661358	0.497858	1.24842	0.819474	1.06253	0.909851	0.272962	0.394077	0.320784	0.332726	0.44611	0.451504	0.786678	0.547341	0.690681	0.873331
ENSOART00000000227.1	0	0	0	0	0	0	0	0	0	0	0	0	0	0	0	0	0	0	0	0
ENSOART00000000247.1	6.95242	3.84508	2.44207	3.30029	3.40381	5.48449	5.25906	3.16414	4.22042	4.78718	0.964257	1.03214	1.01828	1.38829	1.24367	2.44098	4.16542	3.53035	4.42844	5.45854
ENSOART00000000228.1	1.68106	1.72431	2.4294	1.94613	2.3319	1.80617	2.76078	1.67675	2.11553	1.87686	3.40865	2.51091	2.34832	2.95406	2.81165	3.19015	2.89324	3.27766	2.87011	3.08785
ENSOART00000000229.1	0	0	0	0	0	9.91389	11.2516	5.64592	10.2737	4.54831	0.189429	0	0	0	0.0754789	34.1794	24.1211	42.4702	37.2273	16.052
ENSOART00000000233.1	0	0	0	0	0	0	0.805715	0.802742	0	0.738601	1.18207	1.46675	1.41984	0	0	0	0	0	0	0
ENSOART00000000235.1	0.539362	0.750951	0.597658	1.31324	1.51345	0.221039	0	0	1.44174	0.683377	1.48901	0.204441	1.1857	0.835118	1.29364	0.204467	0.117696	0.13319	0.097233	0.121016
ENSOART00000000231.1	0.0410289	0.0241419	0.00872758	0.00865927	0.0210888	0.00799774	0.171704	0.211217	0.159483	0.0430822	0.0620027	0.0399777	0.02768	0.0377464	0.0634071	0.167936	0.115118	0.10015	0.133524	0.141658
ENSOART00000000232.1	0.37213	0	0.19306	0.129699	0.206235	0	0.0535669	0.0785303	0.186977	0.256978	0.255332	0	0.251987	0.0570416	0.0605399	0.14854	0.1984	0.116564	0.478887	0.311704
ENSOART00000000234.1	96.0344	58.6981	26.9712	32.2733	29.9062	62.5629	93.8051	90.0999	85.4396	89.6786	8.00785	9.65637	9.15045	16.0515	11.5543	16.7823	20.6277	28.8473	19.0229	27.8616
ENSOART00000000246.1	15.836	17.2238	15.4229	15.6609	16.9827	15.5841	15.2732	16.3089	15.4534	15.086	8.6592	12.0219	9.37921	7.59267	8.64354	10.4739	17.3802	17.3668	11.3559	15.0032
ENSOART00000000236.1	0.235082	0.115115	0	0.122957	0.0978436	0.171555	0.0507682	0	0	0.121832	0.145314	0.121401	0.0397839	0	0.171935	0	0.187892	0.0551973	0.151158	0.369454
ENSOART00000000237.1	0	0	0.013067	0	0	0.117496	0.0445796	0	0	0	0.692686	0.499628	0.584607	0.506718	0.517995	0.791666	0.774135	0.933014	0.374193	1.17139
ENSOART00000000238.1	0	0.0257438	0	0	0.022426	0.168917	0.0325156	0.151829	0.0402187	0.0550585	0.746592	0.617238	0.962149	1.17447	0.780262	0.656322	0.635455	1.29736	0.624104	1.03932
ENSOART00000000244.1	11.2979	7.5538	6.05074	7.64459	11.7641	10.8488	12.4613	11.1898	17.8357	14.5676	6.58663	5.08446	6.1211	6.62921	7.58849	12.8937	12.2049	13.46	11.6479	15.1309
ENSOART00000000240.1	0	0	0	0	0	0	0	0	0	0	0	0	0	0	0	0	0	0	0	0
ENSOART00000000241.1	0	0	0	0	0	0	0	0	0	0	0	0	0	0	0	0	0	0	0	0
ENSOART00000000239.1	0	0	0	0	0	0	0	0	0	0	0	0	0	0	0	0	0.0108013	0	0.0290008	0
ENSOART00000000245.1	0.0182942	0.0358648	0	0	0	0.534545	1.33712	0.774484	0.951035	0.497911	0.642428	1.09231	0.765348	0.723452	0.637343	1.75939	3.31353	1.5969	3.54061	2.78563
ENSOART00000000242.1	0	0	0	0	0	0.0202105	0	0	0	0	0.0173351	0.0432011	0.0140047	0.0190849	0.0803748	0.0498815	0.165457	0.116871	0.177725	0.0444427
ENSOART00000000250.1	0.0615272	0	0	0	0	0	0.106321	0.155847	0.309225	0.255013	0.202714	0.0423527	0	0.169778	0	0.221045	0.0984067	0.289085	0.263924	0.463299
ENSOART00000000248.1	0	0	0	0	0	0	0	0	0	0	3.16998	1.21221	4.81799	2.64927	2.83907	0	0	0	0	0
ENSOART00000000260.1	0	0.174206	0.0996575	0	0	0.174831	0.0814903	0.0513844	0	0	2.80077	2.73388	3.14413	2.21504	3.69896	5.4997	6.56589	8.50827	4.66444	7.93752
ENSOART00000000261.1	0.0795849	0	0	0.152269	0.136822	0.106608	0	0.0611681	0.106687	0.0419437	1.33107	2.16104	1.56675	1.05177	2.32364	2.26927	4.23436	5.23637	3.97754	3.46523
ENSOART00000000249.1	0	0	0	0	0	0	0	0	0	0	0	0	0	0	0	0	0	0	0	0
ENSOART00000000252.1	0.0543491	0.0255163	0.0290201	0	0.0433348	0	0.0232804	0.0318784	0	0.083824	0.0687115	0.018669	0.0756205	0.152109	0.0241944	0.0965075	0.00904886	0	0.0774249	0
ENSOART00000000254.1	15.4749	9.16375	6.44754	7.49615	7.51753	9.78253	12.3926	13.4942	13.5095	15.4949	5.19151	4.09194	3.72711	4.39303	3.95111	6.75969	7.27628	5.46755	6.76528	5.83417
ENSOART00000000251.1	0	0	0	0	0	0	0	0	0	0	0.638442	0.925117	0.190492	0.247877	0.267452	1.60745	0.97891	4.37484	1.19237	0
ENSOART00000000253.1	0.302792	0.38089	0.224698	0.401545	0.131777	0.130279	0.151684	0.196619	0.0716306	0.238161	0.0408893	0.157515	0.11419	0.114529	0.240989	0.353684	0.0943195	0.15138	0.166236	0.241979
ENSOART00000000256.1	41.9319	34.2567	26.6402	28.6312	31.8607	28.9168	26.1726	28.5013	32.2307	35.4674	42.1073	34.7962	30.5011	35.1412	40.0638	35.0075	32.42	33.7324	33.1957	33.1225
ENSOART00000000255.1	0	0	0	0	0	0	0	0	0	0	0	0	0	0	0	0	0.0158478	0	0	0.0711323
ENSOART00000000258.1	8.94942	4.68709	3.76806	4.0381	4.54913	5.01752	4.69082	4.82487	4.69553	4.9187	8.51356	9.631	11.7793	10.1596	11.3625	9.33676	13.0244	11.6244	13.792	16.0112
ENSOART00000000257.1	0	0	0	0	0	0	0	0	0	0	0	0	0	0	0	0	0	0	0	0
ENSOART00000000259.1	0	0	0	0.133891	0.212841	0	0	0	0	0	0.210741	0.220278	0.260363	0.235642	0.250124	0	0.0204971	0	0.0549744	0.535423
ENSOART00000000262.1	0.412319	0.0367137	0.039281	0.0393279	0.0315446	0.364649	0.422432	0.430076	0.341507	0.507172	0.124404	0.103612	0.0506087	0.103358	0.0364025	0.359517	0.227165	0.0351699	0.064198	0.397204
ENSOART00000000266.1	0.361447	0.291105	0.164359	0.803023	0.242592	20.9668	30.3706	22.229	38.6922	33.9466	4.85678	4.76523	5.2519	5.24833	4.94193	25.9663	41.766	46.1448	36.4153	45.9412
ENSOART00000000265.1	28.2886	28.664	22.2471	26.3408	33.3836	44.3472	44.1328	37.147	48.5236	46.344	15.7588	13.1119	14.0195	15.092	12.0141	21.1025	16.8501	29.0738	15.0991	20.5644
ENSOART00000000263.1	965.065	535.693	434.438	567.286	420.465	1649.76	830.707	1162.55	810.704	772.647	323.622	244.515	300.811	348.319	339.43	662.761	555.282	875.334	628.708	472.06
ENSOART00000000264.1	0.0315095	0	0.0834594	0.0830129	0.0268695	0	0.0137154	0.0404555	0.0160735	0	0.369216	0.328348	0.265758	0.507163	0.457174	0.189464	0.632991	0.443651	0.580156	0.304564
ENSOART00000000269.1	4.36355	5.79282	1.76424	3.59697	2.93115	0.547584	0.801901	0.270052	0.978223	0.766503	2.55868	1.37912	1.1801	2.61588	2.57727	0.286595	0.167666	0.379967	0.178439	0.406364
ENSOART00000000272.1	0.445246	0.652633	0.381923	0.267644	0.43487	0.103671	0.0719174	0.0852766	0.145728	0.183342	0.52961	0.254327	0.15099	0.328094	0.13342	0	0	0.0555144	0	0
ENSOART00000000268.1	0.391735	0.337388	0.190025	0.346996	0.256691	0.471358	0.944821	0.621543	0.765306	0.47705	0.349922	0.34121	0.292598	0.336359	0.46451	0.787366	1.23483	0.987009	1.17362	1.47114
ENSOART00000000267.1	0.200018	0.225929	0.195277	0.143983	0.176702	0.159686	0.164513	0.178656	0.12787	0.0793294	0.0903276	0.21128	0.129309	0.178014	0.202998	0.369309	0.372382	0.260293	0.299531	0.523155
ENSOART00000000273.1	12.5424	9.00496	6.76985	9.0164	9.88069	11.5194	11.6615	9.15126	12.5873	13.0807	2.22118	1.83463	2.16454	2.367	2.12238	4.85851	6.58054	3.14323	6.27886	7.7009
ENSOART00000000270.1	0.421887	2.07318	0.442406	1.35313	1.72863	0	0.0781494	1.06024	3.50586	0	0.687971	0	0.314158	0	0.887762	0	0	1.71947	0	0.891318
ENSOART00000000271.1	0	0	0	0	0	0	0	0	0	0	0	0	0	0	0	0	0	0	0	0
ENSOART00000000278.1	3.86492	1.60946	1.00367	1.06509	1.15285	2.08741	1.50956	1.92208	1.02405	0.887494	7.23365	3.82644	3.3216	6.96043	6.68153	7.98188	11.5955	8.75158	11.5323	20.2571
ENSOART00000000283.1	8.37591	8.77142	10.3297	14.088	16.7554	6.56962	1.91769	3.28122	2.76163	2.99442	19.8401	18.8536	22.8903	15.5615	17.7527	3.59974	5.34174	6.45689	4.45064	5.12665
ENSOART00000000274.1	2.71541	2.09752	1.36582	1.84981	1.37264	2.21824	2.90173	2.44595	2.70386	2.18207	2.0306	2.23145	1.78284	1.69518	2.19374	2.37572	3.69767	3.6118	3.3095	4.66077
ENSOART00000000275.1	7.71007	5.70799	5.12063	5.24801	5.56034	5.95893	7.95139	6.26505	6.85646	6.60608	5.98663	5.52204	5.42757	5.12845	5.65109	5.6563	6.30768	7.97564	7.11967	5.91761
ENSOART00000000280.1	207.037	144.117	96.8092	112.898	124.757	139.988	142.958	158.185	159.169	169.579	79.9978	56.8704	60.7317	71.8832	66.8453	81.4329	101.648	68.7838	97.81	111.576
ENSOART00000000276.1	0	0	0	0	0	0.0245639	0.0876981	0.0322984	0.128289	0	0.0841492	0.12242	0.0681115	0.0463984	0.0489003	0.151516	0.321872	0.284146	0.280887	0.0538853
ENSOART00000000334.1	2.8506	3.67413	3.33308	3.61215	3.83638	3.95615	6.65245	4.63464	5.65636	4.43685	4.32256	4.85632	4.004	3.53786	4.2452	4.91318	7.49016	6.51152	6.65519	7.98862
ENSOART00000000277.1	18.9594	32.3335	6.91383	4.11828	5.54223	8.82861	10.0414	6.82029	6.1521	7.28247	5.47766	9.7028	12.0939	15.5857	7.79253	4.27169	8.76458	4.69395	6.22711	8.0768
ENSOART00000000279.1	0.261092	0	0.358691	0.0908289	0.286595	3.56204	2.85407	1.20598	2.09237	3.33008	0.782366	0.538509	1.5442	1.12431	2.13547	2.29645	2.38271	2.62966	2.32685	1.08456
ENSOART00000000281.1	0.161384	0.0527429	0	0	0	0.628947	0.925448	0.155517	1.68901	1.12792	0.180268	0.224355	0.208701	0.705113	0.676149	3.26803	2.86456	5.2139	1.1978	3.7317
ENSOART00000000282.1	23.2502	16.913	21.7704	23.5601	28.5609	21.4776	28.4067	22.3824	24.4399	25.501	19.6418	14.9203	19.5018	21.7255	16.8445	45.4922	34.5277	39.7832	40.2442	36.3505
ENSOART00000000284.1	0	0	0	0	0	0	0	0	0	0	0	0	0	0	0	0	0	0	0	0
ENSOART00000000296.1	5.49995	5.26777	4.01234	3.54391	3.31734	4.80066	7.05326	5.38301	5.90318	5.59364	15.5127	14.7282	9.68937	12.6126	13.12	22.7457	24.9984	28.3963	17.7938	22.7121
ENSOART00000000293.1	11.7903	11.0937	7.35992	8.09367	9.2541	7.81866	11.4723	10.1599	10.4624	8.66791	6.30185	5.7455	4.99888	5.30727	5.89524	22.5036	23.1504	31.3874	21.9781	19.2862
ENSOART00000000285.1	0.0777291	0.0253883	0.027309	0.0272536	0	2.04302	0.0675309	0.0331587	0.0790218	0.0270592	1.27419	1.70575	1.60866	1.85809	2.23479	8.21413	8.52741	11.4278	9.51817	9.56859
ENSOART00000000286.1	0	0	0	0	0	0	0	0	0	0	0	0	0	0	0	0.254355	0	0	0	0
ENSOART00000000287.1	0	0	0	0	0	0	0	0	0	0	1.83636	2.46299	2.19088	2.10099	1.06174	6.83415	5.79141	7.74665	6.03434	3.93551
ENSOART00000000291.1	0.0220799	0	0	0.0232414	0	0	0.0191976	0	0.022477	0.0230866	0.165895	0.107209	0.104299	0.101517	0.171063	0.132647	0.0422475	0.186501	0.0189079	0.188977
ENSOART00000000288.1	0	0	0	0	0	0.0506753	0.0902598	0	0	0	0.0431985	0.0360032	0	0.0482653	0	0	0.0166909	0.147479	0.175019	0
ENSOART00000000289.1	0.0834645	0.020451	0	0	0.0177384	7.07123	5.44399	3.04914	5.50384	2.77184	4.70558	8.33923	5.64625	8.74973	8.0407	41.7753	66.3876	53.542	59.9135	99.0108
ENSOART00000000292.1	0	0	0	0	0	0	0	0	0	0	0	0	0	0	0	0	0.0536679	0.0197438	0.0540441	0.135122
ENSOART00000000290.1	0	0	0	0	0	0	0.0127954	0	0	0	0	0	0	0	0	0	0	0	0	0
ENSOART00000000299.1	0	0	0	0.0151811	0	0	0	0	0	0	0	0.0100087	0	0	0	0	0	0	0	0
ENSOART00000000294.1	2.16095	1.98933	1.89984	2.63145	2.49102	1.9834	2.9908	2.07811	2.83185	2.43223	4.39168	3.86714	2.77958	3.58417	3.54135	3.04088	4.68176	4.97574	4.74887	6.80043
ENSOART00000000295.1	38.1655	36.4898	32.6266	34.0556	33.6023	27.207	26.045	28.4765	30.5214	24.7526	38.0227	31.8717	29.7504	36.1949	39.5941	24.0994	26.7599	26.1748	30.1352	32.9283
ENSOART00000000297.1	0.127504	0	0	0	0	0	0	0	0	0	0	0	0	0	0	0	0	0	0	0
ENSOART00000000298.1	0	0	0.383078	0	0	0	0.321265	0	0	0	0.48148	0.158528	0	0	0	0	0.524735	0.0875741	0	0
ENSOART00000000301.1	14.8669	9.30664	7.96426	8.09355	13.8235	11.057	12.789	10.5984	15.7471	13.9446	5.26152	4.60845	4.97307	4.66093	5.88515	10.6963	9.39197	8.80576	8.28464	10.1158
ENSOART00000000304.1	3.98186	2.86043	1.90216	2.26383	2.5798	2.03198	2.81556	1.8652	2.73632	1.64569	4.70392	4.2926	4.61488	3.63823	5.66129	4.9677	3.9757	8.83352	3.70494	4.26632
ENSOART00000000306.1	2.31914	1.25152	0.817548	1.25799	0.969164	1.71862	1.88829	0.765643	1.13582	1.09967	1.60137	2.19234	2.04303	1.31994	2.38162	1.25299	1.34756	3.74204	0.999999	2.39881
ENSOART00000000317.1	19.3697	17.0084	7.50771	15.6781	13.8237	17.5096	15.2631	16.9819	14.2149	11.7879	8.76046	8.01047	7.56406	7.82057	8.54211	5.02729	7.41228	8.55768	5.37488	6.42996
ENSOART00000000320.1	13.4607	14.7202	10.9564	14.7418	15.8892	14.6944	19.6479	15.9997	19.5956	19.3829	7.99279	6.6584	7.12306	6.67444	8.01531	7.08544	7.61102	13.1247	5.622	8.90568
ENSOART00000000300.1	0.0287856	0.0423629	0.0229898	0.0382628	0.0123385	0.0633332	0.100767	0.13911	0.0962432	0.128596	0.0668453	0.0905768	0.0879796	0.0799786	0.0838651	0.0780586	0.134845	0.162279	0.199187	0.248694
ENSOART00000000302.1	41.7637	31.6617	24.5404	26.8982	23.4463	60.9466	86.3101	89.7196	75.7957	71.6996	28.8562	20.7543	28.905	18.5233	21.4028	132.211	72.5103	152.608	87.9236	55.1972
ENSOART00000000303.1	0.0168558	0.0165236	0	0.0341413	0.0287281	0.0397996	0.0282007	0.0495134	0.0662757	0.0529575	0.0272024	0.0488607	0.102361	0.026169	0.0448526	0	0.0578853	0.141154	0	0.167071
ENSOART00000000305.1	0	0	0	0	0	0	0	0	0	0	0	0	0	0	0	0	0	0	0	0
ENSOART00000000311.1	0.0584073	0	0	0	0	0	0	0	0	0	0.215392	0.13613	0.0623418	0.104473	0.237573	0.349267	2.4406e-05	0.233147	0.000468243	0
ENSOART00000000312.1	0.300446	0.443766	0.496772	0.548195	0.54694	0.697735	0.80463	0.775786	0.746932	0.465658	0.717488	1.03115	0.775978	0.579659	0.998078	0.393604	1.22231	1.54831	0.870968	2.03996
ENSOART00000000307.1	4.47879	4.97123	4.81605	4.46237	4.56337	4.10963	5.14972	5.21228	4.80442	4.26369	4.5735	4.30641	3.2499	2.76738	3.57936	3.41927	4.95529	5.3516	4.27759	5.82354
ENSOART00000000308.1	0	0	0	0	0	0	0	0	0	0	0	0	0.0766772	0	0	0.267558	0.108118	0.105392	0.193376	0.69067
ENSOART00000000313.1	17.2668	11.0893	5.26607	7.89836	11.3136	18.6358	20.306	16.0038	24.9957	22.8067	3.63587	2.80327	3.26564	3.67094	5.51019	4.34994	7.15954	8.66005	5.41165	9.93142
ENSOART00000000309.1	0	0	0	0	0	0	0	0	0	0	0	0	0	0	0	0	0	0	0	0
ENSOART00000000310.1	5.074	4.9715	3.22352	3.42171	5.8136	5.36832	4.28707	6.80763	7.64904	7.71435	7.18954	6.6094	6.30897	7.25073	6.65661	1.72159	2.37455	2.27719	1.60572	1.35257
ENSOART00000000314.1	0.650955	0.509302	0.372435	0.458225	0.380883	0.384192	0.431791	0.370647	0.334899	0.190843	0.288994	0.443849	0.237237	0.419863	0.40348	0.334281	0.71942	0.535188	0.58169	0.739917
ENSOART00000000322.1	2.31488	1.37863	0.642117	0.983678	0.576142	5.22743	5.69575	7.44458	6.98016	5.21536	4.33051	5.15312	3.95325	2.67094	5.78475	17.2371	19.4309	24.4947	15.5919	16.4753
ENSOART00000000315.1	7.44976	9.35595	5.96229	9.13375	10.0858	9.34427	9.55584	11.2503	10.5779	9.31336	3.2725	3.20486	3.10564	4.34038	3.95587	2.78043	4.76516	3.70516	5.92628	7.75046
ENSOART00000000316.1	0.0352039	0	0	0	0	1.16458	2.41203	3.32451	3.42395	0.916643	0.350835	0.48682	0.403992	0.420675	0.751828	1.81546	1.76288	1.4204	1.23603	2.46553
ENSOART00000000318.1	132.137	103.976	91.8715	99.4088	113.427	157.922	176.312	180.136	191.581	182.937	103.939	91.2114	96.6492	98.8467	127.73	214.969	206.068	232.027	179.43	246.007
ENSOART00000000326.1	36.6493	30.5146	23.9427	28.4514	27.2063	37.0713	45.9791	39.0218	37.866	40.6525	32.8828	28.4526	25.3641	28.9886	28.9937	41.8153	51.3136	49.9937	58.1902	57.2857
ENSOART00000000319.1	31.621	22.3592	42.3535	50.743	179.734	16.391	13.8994	25.4075	99.8202	56.6069	101.86	74.8833	85.8994	112.08	147.657	157.83	80.0805	88.8303	52.1843	67.7861
ENSOART00000000323.1	15.2547	2.94214	0.734361	2.08648	1.18089	40.2416	15.5797	14.5778	5.85812	9.48912	3.88688	3.54781	3.23866	2.56343	2.18288	6.79228	6.19029	6.21414	6.22147	7.32158
ENSOART00000000321.1	0	0	0	0	0	0	0	0	0	0	0	0	0	0	0	0	0	0	0	0
ENSOART00000000325.1	1.36979	1.07235	0.496466	0.715461	0.511246	2.93457	3.48707	2.85929	2.40519	2.48197	4.44373	4.61469	3.7637	9.64198	4.55093	33.2138	25.133	29.5712	26.7038	19.8674
ENSOART00000000328.1	5.65981	6.75408	5.796	5.89792	5.76739	9.66012	6.10749	9.49324	8.29952	6.54039	7.24417	5.01618	6.73358	6.94561	5.99307	3.64017	5.89183	3.40364	5.6435	6.02766
ENSOART00000000324.1	0	0	0	0	0	2.16535	3.23758	3.86771	2.928	0.935106	0.342263	0.382207	0.754596	0.511413	0.747077	1.49712	1.80284	1.50376	2.98461	2.8993
ENSOART00000000327.1	0.143655	0.105536	0.0376657	0.113077	0.0605042	0.279531	0.0311434	0.0916248	0.0727524	0.149588	0.0894519	0.0496551	0.0484876	0.0660228	0.104603	0.129201	0.217646	0.16849	0.276794	0
ENSOART00000000329.1	2.39698	3.07242	3.55073	3.73855	3.30677	2.10441	4.33226	1.46013	2.53751	1.72812	6.4033	7.26499	6.04778	4.20303	7.9288	6.53379	9.90395	9.76226	8.54247	13.6764
ENSOART00000000330.1	193.66	204.709	350.777	418.182	448.868	134.153	139.436	265.643	294.25	207.875	678.289	615.047	556.358	668.016	591.083	453.345	410.932	379.386	477.409	331.898
ENSOART00000000331.1	0	0	0.018163	0	0	0.0167105	0	0	0.0174941	0	0.0143505	0.0238281	0.0115758	0	0.0165985	0	0.114881	0.0483081	0.0734574	0.0736357
ENSOART00000000333.1	222.133	90.3988	28.4218	62.6541	84.8093	305.848	312.96	425.253	430.711	345.651	434.785	343.89	278.447	386.886	410.848	718.565	405.032	606.646	368.564	311.346
ENSOART00000000332.1	0.0410086	0.0428849	0.0525545	0.0620801	0.0620267	0.0299977	0.0403347	0.0634194	0.0416572	0.022019	0.0992133	0.0714358	0.0522481	0.0610062	0.0856909	0.0832974	0.115899	0.141932	0.0738172	0.0900942
ENSOART00000000335.1	19.4627	13.1366	8.95231	8.63523	9.4158	13.3337	17.7415	16.4256	16.5934	18.7127	8.78405	8.32073	7.22823	7.66397	8.14167	11.2483	18.6198	12.8826	16.2987	25.7251
ENSOART00000000336.1	7.42747	6.19535	3.64363	5.55446	5.75491	5.41819	6.35801	6.88345	6.50693	5.47469	3.86007	3.39187	2.54391	2.98503	3.99233	4.17081	4.97225	7.62135	4.70243	6.69226
ENSOART00000000337.1	0.0120993	0	0.0128431	0.012759	0.0103405	0.801684	0.0316224	0	0	0	0.608515	1.24512	0.979601	0.845863	1.19292	1.00449	1.6512	2.16941	1.20197	2.26608
ENSOART00000000338.1	18.0499	14.0713	9.66798	14.6032	14.6292	15.7693	23.3408	14.0621	19.6246	16.6877	4.92616	5.14526	6.28217	4.45649	5.11393	4.68569	8.8045	5.51556	8.24881	11.3707
ENSOART00000000349.1	42.0988	35.6876	23.8061	26.5047	31.5825	39.4086	55.5639	38.9642	44.6266	43.1916	35.2618	32.0324	23.1691	30.4398	33.6647	37.1981	51.3728	47.9725	40.5831	65.3059
ENSOART00000000347.1	21.2259	17.8307	10.9998	15.9114	14.9448	15.7733	15.4525	12.0114	12.8165	12.3397	12.4228	9.73703	6.38691	11.4888	9.97227	4.18317	5.11066	10.6102	5.10432	5.59052
ENSOART00000000351.1	43.9035	31.5104	14.007	20.7898	21.4301	33.1149	36.7187	37.9775	39.2951	42.9743	10.5121	8.00517	10.1707	13.1871	9.54786	9.33276	10.6424	12.128	10.6882	13.4726
ENSOART00000000340.1	5.30488	3.06185	3.6591	3.74295	4.90511	4.44582	5.15355	4.54283	6.55041	6.02337	1.87503	1.22889	1.59722	1.82322	1.6272	3.29336	3.23757	2.82449	2.79664	3.40312
ENSOART00000000339.1	0	0	0	0	0	0	0	0	0	0	0	0	0	0	0	0	0	0	0	0
ENSOART00000000343.1	8.33196	8.12002	4.90178	6.58242	5.69925	7.06367	6.30416	8.10402	7.43009	7.36458	4.15583	3.7189	2.40318	2.8017	4.6234	4.66388	7.092	5.19857	4.57014	11.1868
ENSOART00000000341.1	0	0	0	0	0	0	0	0	0	0	0	0	0	0	0	0	0	0	0	0
ENSOART00000000342.1	7.27121	5.08768	6.2137	6.87122	16.3183	8.32145	9.55057	8.17605	21.1572	20.0904	5.26345	5.02823	5.7264	8.08429	8.30123	20.0169	19.6247	16.2448	14.2622	23.3762
ENSOART00000000354.1	0.802027	0.735703	0.491999	0.634137	0.557123	0.747262	1.06036	0.713474	0.815716	0.582622	0.98718	1.16297	0.783077	1.24063	1.09784	1.59251	2.03149	1.7155	1.43866	2.47384
ENSOART00000000356.1	0	0	0	0	0	0	0	0	0.00288667	0	0	0	0	0	0	0	0.00454371	0.0053362	0	0
ENSOART00000000344.1	46.6128	21.9263	14.8471	22.0883	17.1759	11.6687	7.8983	5.69699	3.94855	3.15501	12.3277	20.9106	16.319	20.9904	20.5287	9.5493	15.7579	7.38025	16.5413	19.7709
ENSOART00000000346.1	2.90444	2.56045	1.03927	1.51656	1.7576	2.34446	2.42068	2.40271	2.32951	1.81668	1.27281	1.10218	0.613588	1.03458	1.6157	1.37711	3.63255	1.62499	2.96477	6.58105
ENSOART00000000345.1	0	0	0	0	0	0	0	0.0225652	0	0	0	0	0	0	0	0	0	0	0	0.0377307
ENSOART00000000348.1	0	0	0	0	0	0	0	0	0	0	0	0	0	0	0	0	0	0	0	0
ENSOART00000000353.1	5.27422	7.6978	7.19918	1.50836	5.01512	1.39916	2.76065	0	0	0	1.76638	0	2.22772	2.73476	1.35028	4.71022	0.536746	0	0	0
ENSOART00000000355.1	0.988902	0.527253	0.69692	0.920995	1.123	5.00805	4.09685	4.65824	4.90239	3.05955	1.68392	1.52946	1.39925	2.34238	1.80641	2.33929	1.74782	2.05219	1.84588	3.51958
ENSOART00000000352.1	0.0325786	0	0	0.0342303	0.0275032	0.0317033	0.084809	0.0832195	0	0.0679165	0	0.0901606	0	0.089847	0.158065	0.742631	0.394889	0.855984	0.223193	0.346328
ENSOART00000000350.1	0	0	0	0	0	0	0	0	0	0	0	0	0	0	0	0	0	0	0	0
ENSOART00000000367.1	18.7463	15.6228	10.5092	13.1426	14.8019	16.461	21.731	17.0797	18.4941	16.0763	11.4091	9.91123	9.35064	11.3755	11.7304	16.2389	18.9431	25.226	15.4916	22.5818
ENSOART00000000359.1	7.5681	9.65955	4.78792	4.47843	5.61388	3.70547	2.89104	3.19715	3.55435	3.51596	10.2425	10.2175	10.1671	11.4122	12.0929	5.37121	6.63189	7.79972	6.41066	7.22954
ENSOART00000000370.1	0.645552	3.87778	6.77018	9.31808	14.7938	3.28997	2.94058	1.45712	1.65988	0.805011	4.66815	2.50905	2.79014	3.90392	3.77293	1.70527	2.1192	2.22802	1.64339	1.96438
ENSOART00000000360.1	18.5584	20.3219	18.9468	16.2786	17.3766	20.1899	23.8907	22.9563	23.9052	23.2407	22.5427	18.8421	16.8011	17.3157	19.6698	30.2721	30.1023	32.8122	31.5334	36.6004
ENSOART00000000358.1	870.566	686.906	542.239	599.373	643.485	507.914	665.604	717.379	735.443	807.548	378.797	285.912	317.567	410.763	348.622	604.767	658.813	430.129	674.812	595.763
ENSOART00000000364.1	46.3523	32.981	24.5658	26.8571	33.7344	37.447	48.3038	44.381	57.157	57.7754	10.6503	7.26761	7.67541	12.7723	10.0868	26.2202	16.6514	20.1968	22.265	18.3213
ENSOART00000000357.1	0	0	0	0	0	0	0	0	0	0	0	0.0809654	0.647631	0.108973	0	0	0	0	0	0
ENSOART00000000361.1	5.84596	6.98032	7.74624	11.6036	10.3755	3.80225	10.1179	9.74903	14.1904	10.3423	19.8909	13.7923	14.7361	15.8769	19.7529	60.9813	32.7824	63.898	41.0789	33.953
ENSOART00000000362.1	0.245277	0.309239	0.230355	0.223932	0.230126	1.08401	1.52576	0.982054	0.752908	0.479917	1.41841	1.45231	1.35926	1.14416	1.72507	2.80625	3.61216	3.33069	3.74003	3.98441
ENSOART00000000365.1	8.33876	7.79436	5.7701	7.82355	7.9053	1.46342	1.6452	1.56423	1.46724	1.1996	10.3337	10.4042	7.65871	7.89242	9.10625	13.651	7.73448	13.8317	6.13334	6.48609
ENSOART00000000386.1	14.7335	10.7878	7.06291	10.8079	12.1942	13.9802	19.0735	12.9319	17.8142	16.246	7.52472	7.48715	8.60001	7.44547	8.1322	12.4905	18.4938	15.6882	16.9925	22.7311
ENSOART00000000366.1	1.45576	1.26743	0.330359	0.338319	0.262282	0.945209	0.698154	4.05054	2.58658	1.84192	0.917667	2.12965	2.84323	2.71858	1.28995	20.3349	36.5469	4.63528	62.9173	47.6807
ENSOART00000000368.1	16.6526	10.9666	7.77582	8.97921	9.08095	13.3093	16.604	14.993	15.5883	18.9409	8.40103	7.14063	5.69312	8.79658	9.76616	8.19379	6.32315	10.5166	7.18159	8.39436
ENSOART00000000383.1	0	0	0	0	0	0	0	0	0	0	0	0	0	0	0	0	0	0	0	0
ENSOART00000000369.1	0.825522	1.02953	0.854661	0.780409	0.854466	1.14175	1.80842	1.46662	1.38093	1.04528	1.91596	1.65715	1.49153	1.47608	1.75865	2.38403	2.94149	2.96511	2.04441	4.18167
ENSOART00000000371.1	0	0	0	0	0	0	0	0	0	0	0	0	0	0	0	0	0	0	0	0
ENSOART00000000373.1	0.116664	0.114258	0	0.0610245	0	0	0.151181	0.221718	0.234645	0.0604628	0.144254	0	0.157945	0.0536083	0.0568739	0.349226	0.0932432	0.712141	0.600118	0.366756
ENSOART00000000377.1	4.26369	1.24224	1.02174	1.77061	1.07616	1.27908	1.60277	1.03327	0.891236	0.84317	1.50014	1.75808	1.95964	1.12317	0.781323	2.68569	5.96682	3.00649	5.11159	5.37199
ENSOART00000000374.1	5.85179	4.25757	3.3549	4.07609	6.26016	4.82958	5.92005	4.19102	6.9615	6.04942	2.89071	2.78962	2.91525	3.05562	3.25202	4.57631	5.36704	4.78204	4.54257	5.96121
ENSOART00000000375.1	5.85179	4.25757	3.3549	4.07609	6.26016	4.82958	5.92005	4.19102	6.9615	6.04942	2.89071	2.78962	2.91525	3.05562	3.25202	4.57631	5.36704	4.78204	4.54257	5.96121
ENSOART00000000405.1	12.3244	6.98829	5.57533	8.40866	12.4108	14.5317	13.638	10.2475	16.7052	14.9579	11.9087	12.6953	14.1805	12.0168	16.6739	14.3494	16.6144	15.011	14.4964	21.0863
ENSOART00000000389.1	21.8392	19.6281	15.0328	15.6111	16.2161	21.2765	30.8598	29.2391	30.2627	25.8171	14.6786	12.9026	11.4226	14.3809	13.1701	30.3248	24.4186	38.566	25.2077	26.6975
ENSOART00000000382.1	0	0.0139126	0	0	0.0484493	0.331803	0.0617873	0.0546854	0.0434564	0	0.0594232	0.09862	0.047873	0.104419	0.013722	0.0853449	0.0643024	0.0666029	0.121525	0.0305097
ENSOART00000000388.1	21.1378	32.3754	32.5695	38.1655	39.6226	18.6254	21.8534	32.5472	30.8506	28.7882	12.7672	9.16967	11.7881	15.8266	10.2353	25.1962	21.373	19.3052	19.0093	23.9381
ENSOART00000000376.1	0.853112	0.745873	0.556731	1.03727	1.29294	0.40575	0.694286	0.44211	0.787091	1.14937	0.615041	0.369056	0.813637	0.412839	0.787288	1.21767	1.88924	1.08138	1.8722	1.98829
ENSOART00000000385.1	17.9066	13.5429	10.1847	12.2592	12.1853	21.1391	24.1009	20.6121	20.8918	19.3056	7.41693	6.62237	5.91368	6.9449	7.08521	11.8648	17.7384	14.4095	16.1858	22.9771
ENSOART00000000387.1	9.34421	5.31113	4.31961	5.92863	6.94806	10.0862	8.32862	6.95287	9.95668	8.71099	3.30851	3.2293	3.04477	3.47268	3.26696	9.19071	11.5279	7.49077	11.0785	12.8611
ENSOART00000000379.1	0.4316	0	0.221599	0.683143	0.175264	0.848632	1.31638	0.813856	0.219364	0.676073	0	0.606105	0	0.20379	0	1.59155	2.03328	0	0.97302	3.14536
ENSOART00000000380.1	0	0	0	0	0	0	2.33118e-09	3.37383e-09	0	0	0	0	0	0	0	0	0	0	0	4.94777e-09
ENSOART00000000378.1	0	0	0	0	0	0	0	0	0	0	0	0	0	0	0	0	0	0	0	0.133856
ENSOART00000000381.1	0	0	0	0	0.0563236	0	0.117178	0.0858979	0.272541	0.0703209	0	0.140069	0.138163	0	0.132711	0.731707	1.67377	0.510911	1.3409	2.40925
ENSOART00000000392.1	0	0	0	0	0	0	0	0	0.146134	0	0	0	0	0	0	0.174551	0.0233616	0	0	0
ENSOART00000000384.1	0.516881	0.692756	0.470885	0.562613	0.629011	0.586033	0.762096	0.534161	0.536033	0.475574	0.908509	0.777316	0.592818	0.583293	1.01462	0.85696	1.34131	1.11884	0.903234	1.70109
ENSOART00000000394.1	379.311	348.059	234.846	270.58	287.62	145.681	157.686	181.751	206.826	210.885	133.106	100.912	85.1272	96.781	127.088	101.388	84.3261	92.3835	79.4387	79.6518
ENSOART00000000390.1	0.164672	0	0.231239	0.144304	0.278867	0	0	0	0	0	0.205759	1.0837	0.518623	0.126161	1.14406	1.21898	3.07041	2.44668	1.73912	2.86813
ENSOART00000000391.1	135.238	200.772	149.194	127.15	135.808	130.559	145.62	131.753	102.047	100.878	86.4457	67.9329	85.8229	71.6052	74.1584	53.7236	64.7232	35.6148	68.5752	80.8896
ENSOART00000000398.1	9.09517	7.25772	4.67558	6.62669	6.88299	9.46437	9.91657	7.61248	8.24345	9.30109	5.38216	3.84688	3.35183	3.23005	4.63202	5.09539	8.15235	7.32922	8.94082	13.549
ENSOART00000000403.1	6.25652	6.0907	3.85964	4.49945	4.64102	7.37825	7.77022	6.36423	7.1625	6.45116	4.82929	3.81042	3.47508	4.76144	5.22384	6.33328	8.33214	7.00425	6.8626	12.0951
ENSOART00000000393.1	8.71301	5.10869	2.88391	3.59183	3.41822	5.39232	5.02423	6.37968	5.70294	5.82207	2.68296	2.24975	1.65654	2.1218	2.74991	3.80615	4.72106	6.15563	4.19826	6.35966
ENSOART00000000395.1	2.72059	2.00753	1.03705	0.824875	1.21675	2.02839	2.07428	2.00159	2.32124	2.27117	0.659208	0.432966	0.485483	0.409086	0.568975	1.09022	1.09636	1.36689	1.00168	2.16766
ENSOART00000000396.1	878.379	1140.33	1181.63	1059.29	1051.54	940.344	860.669	956.065	923.899	1008.35	437.225	387.6	344.492	402.274	326.731	560.155	671.458	582.142	650.807	659.749
ENSOART00000000404.1	0	0	0	0	0	0	0	0	0	0	0	0	0	0.0241814	0.0169273	0.0210938	0.0279355	0.0493534	0.0300143	0
ENSOART00000000397.1	0	0	0	0	0	0	0	0	0	0	0	0	0	0	0	0	0	0	0	0
ENSOART00000000399.1	0.512916	0.51121	0.542271	1.66447	1.73333	0	0.915606	1.29922	0	0	0.419536	0	0	0	0	0	0	0	0	0
ENSOART00000000401.1	407.801	352.815	238.5	290.377	250.696	471.398	489.093	362.033	333.9	392.06	144.437	126.353	135.061	145.385	138.223	173.308	206.86	182.17	223.769	211.269
ENSOART00000000400.1	0	0	0	0	0	0	0	0	0	0	0	0	0.187117	0	0	0	0	0	0	0
ENSOART00000000402.1	19.283	14.2867	12.1721	14.4666	16.2652	18.6803	28.0413	16.2579	21.2951	18.7926	5.87377	6.72992	7.37382	4.93807	5.57484	7.01811	12.6204	6.92931	11.9161	14.4618
ENSOART00000000406.1	12.828	13.3208	10.3643	9.98053	9.46844	8.80817	12.5327	12.498	13.32	11.2887	6.6668	5.59171	5.27592	5.29092	5.72522	11.3898	16.4569	9.17031	14.6238	20.4427
ENSOART00000000407.1	19.1562	18.6839	13.9414	15.4975	18.2439	23.8459	20.8461	24.497	26.5862	25.7088	23.1292	16.2849	13.8739	15.8994	15.0039	15.6226	15.4313	14.444	13.2095	16.8432
ENSOART00000000408.1	0.232225	0.625676	0.79423	0.915492	0.564781	0.197765	0.378059	0.408242	0.324268	0.363446	2.489	2.57294	1.54769	1.868	3.37786	0.871092	1.82381	0.844401	1.78968	2.35028
ENSOART00000000409.1	59.0474	36.0965	24.1307	27.001	24.4721	57.3533	56.511	51.9635	51.5244	65.2475	15.0908	14.9225	12.7745	13.7517	15.4907	20.7548	30.5864	21.218	27.541	37.0334
ENSOART00000000412.1	0.0218347	0.00535394	0	0	0	0	0.00476183	0	0	0	0.1147	0.0456204	0.0920623	0.0251122	0.0368882	0.0525919	0.107903	0.107628	0.0841501	0.188786
ENSOART00000000416.1	0.244167	2.73175	1.73904	1.388	0.22994	0.265546	0.000859335	0.400687	0.275943	0.186429	5.4933	6.71436	7.31032	5.45287	6.85091	0.309178	0.114772	0.665391	1.00279	0.829785
ENSOART00000000418.1	0.302986	0.216722	2.15723	1.80238	2.54045	0.335566	0.761367	1.35183e-08	0.34147	0.232521	6.77082	11.8585	10.1357	6.83423	8.76899	0.408785	1.18537	0.868125	0.00372694	1.04237
ENSOART00000000410.1	0.127095	0.217903	0.367328	0.100169	0.134183	0.185531	0.579089	0.0811843	0.547961	0.39753	0.237816	0.197889	0.343156	0.17526	0.0924822	0.533745	0.26351	0.506875	0.19047	0.405565
ENSOART00000000411.1	64.7429	48.5129	39.0758	40.1787	84.2432	44.9442	37.8481	39.6288	89.3509	79.5178	24.9707	21.6369	19.8012	27.5867	28.8767	70.2483	43.2422	48.0326	33.4778	31.1471
ENSOART00000000415.1	0	0	0	0	0	0	0	0	0	0	0	0.0173783	0	0.0114961	0	0.0902184	0.159399	0.0821244	0.053515	0.161388
ENSOART00000000413.1	0	0	0	0	0	0	0	0	0	0	0	0	0	0	0	0	0.00449262	0	0.0120848	0
ENSOART00000000414.1	0	0	0	0	0	0	0	0	0	0	0.0236827	0.04913	0.104935	0	0.0273432	0	0	0	0	0
ENSOART00000000417.1	3.32386	2.20857	1.0916	1.40694	1.91696	0.873677	2.74394	2.92439	1.64253	1.65187	1.69631	1.11789	0.840953	1.64952	1.34192	2.03943	4.00219	1.53964	4.51332	6.45394
ENSOART00000000426.1	0.00922225	0.0452186	0.0392143	0.0486506	0.0315819	0.0269635	0.0401946	0.0118652	0.0377211	0.00968077	0.085133	0.14759	0.149325	0.101809	0.142551	0.199812	0.158784	0.216448	0.126369	0.218771
ENSOART00000000421.1	3.07274	1.88241	2.94511	3.37764	4.23267	1.34667	2.27218	1.67484	2.62232	2.8137	3.62757	2.87937	2.83799	3.30264	4.77718	11.0803	10.0006	8.88638	7.13756	8.39743
ENSOART00000000420.1	14.2705	9.22571	6.87495	6.42617	6.89614	13.0932	15.3616	11.9136	11.5575	12.7732	6.39543	6.37237	4.44426	5.22981	5.52025	10.9686	13.91	10.1345	14.1933	16.9072
ENSOART00000000419.1	0	0	0	0	0	0	0	0	0	0	0	0	0	0	0	0	0	0	0	0
ENSOART00000000424.1	0.128665	0.0315333	0.0681474	0.0677902	0.0411359	0.0626677	0.224004	0.0206471	0.213285	0.084236	0.0403778	0.0223443	0.0651115	0.0295843	0.171134	0.0773611	0.0820551	0.0754821	0.316782	0.103616
ENSOART00000000422.1	0	0	0	0	0	0	0	0	0	0	0	0	0	0	0	0	0	0	0	0
ENSOART00000000430.1	14.0651	8.7911	5.79938	8.00999	9.47372	7.7178	6.73667	4.77277	7.01023	7.92177	6.2569	6.77563	6.14617	8.53151	7.17591	6.39127	7.11963	7.81005	5.44271	8.52979
ENSOART00000000425.1	20.0258	11.1011	9.30306	7.71738	9.73549	7.95767	11.8635	9.4227	10.2816	8.85756	7.18845	6.73193	7.48375	5.45996	6.10743	7.25386	8.7604	7.11733	9.17865	9.48973
ENSOART00000000429.1	18.4099	13.0055	9.399	10.301	12.7349	17.2787	17.1254	17.9722	20.271	18.2298	8.14167	7.87778	7.81513	7.68647	8.36289	15.0242	17.1222	16.2416	17.0932	18.2259
ENSOART00000000423.1	0	0.0393875	0	0	0	0.508485	0.104519	0.358556	0	0	0	0	0.0271491	0	0.117222	0.626467	0.461787	0.943337	0.516551	0.340379
ENSOART00000000427.1	3.52527	2.59548	3.09952	3.18752	3.21784	4.09672	5.61358	3.65545	3.90188	2.93111	5.89124	5.52495	5.33531	5.13148	5.12197	7.36972	8.95705	9.74574	10.6581	9.24861
ENSOART00000000428.1	0	0	0	0	0	0	0	0	0	0	0	0	0	0	0	0	0	0	0	0
ENSOART00000000434.1	0	0	0	0	0	0	0	0	0	0	0.0804571	0.419657	0.119609	0.0812374	0.195109	0.575797	0.872051	1.47083	0.176449	1.65884
ENSOART00000000437.1	0.190439	0.0920557	0.0537383	0.0676576	0.061369	0.372189	0.228464	0.178423	0.12405	0.0528614	3.54836	4.32326	2.80049	4.87689	3.96515	16.257	21.7081	19.7662	14.7355	26.6905
ENSOART00000000431.1	0	0	0	0	0	0	0	0	0	0	0.0214538	0.0178363	0.0173687	0.0473259	0.0997669	0.278166	0.155949	0.0483047	0.286506	0.32968
ENSOART00000000433.1	2.12524e-09	0	2.73548e-09	0	7.38153e-10	8.65656e-10	2.62583e-09	2.0845e-09	5.80305e-09	2.29001e-09	2.40529e-08	0	0	0.374391	3.59364e-09	0	0	0	0	0
ENSOART00000000436.1	0.171548	0.140156	0.197045	0.260595	0.122013	0.320332	0.336117	0.293806	0.350214	0.269695	1.02961	1.00737	0.376177	0	0.635903	3.04355	3.55925	3.90802	0.918888	2.92202
ENSOART00000000432.1	0.142111	0.13906	0.0998066	0.174283	0.401749	0.230267	0.205864	0.364001	0.240847	0.123702	0.217438	0.0492258	0.0957164	0.0652251	0.0458125	0.141874	0.105588	0.110911	0.182101	0.354127
ENSOART00000000435.1	24.3886	16.5764	12.236	14.4405	13.2398	12.4363	17.6	17.8427	18.1073	17.3415	9.7509	9.59554	7.76059	7.63825	8.76354	12.926	16.0865	11.3574	13.1372	15.3383
ENSOART00000000438.1	40.3759	38.4289	28.1344	37.3443	34.4676	36.1505	57.333	53.939	58.4818	54.1266	21.548	15.4224	18.7052	21.7463	17.5997	38.884	36.2654	39.251	35.9374	29.2489
ENSOART00000000439.1	10.0584	9.4049	6.51671	6.77475	6.56278	4.08643	5.59648	6.39892	6.04881	6.89575	6.44327	5.89859	5.55716	5.10763	5.0905	4.83742	5.9926	4.29286	6.61117	8.15468
ENSOART00000000449.1	0.161344	0.0126593	0	0.0272504	0.0166038	0.0880724	0.0450301	0.0747957	0.151931	0.0678038	3.70333	4.83964	4.24937	4.41178	4.49918	5.96058	6.79025	7.28322	4.41623	5.1026
ENSOART00000000440.1	50.0443	37.0985	29.6619	34.2543	43.3149	44.7351	45.1732	47.1086	51.0464	49.8718	19.9633	16.6281	17.6542	17.2797	20.8388	51.7972	51.6629	39.0233	40.4134	53.8825
ENSOART00000000443.1	39.0983	53.3375	55.3567	51.0617	62.0617	32.2394	37.6225	46.0209	53.364	50.8393	33.6636	24.9264	14.5777	20.9444	19.3178	21.9527	17.8633	17.0152	13.8017	15.5454
ENSOART00000000442.1	0.278772	0	0.095686	0	0	0.633934	1.52351	0.117046	0.651065	0.288357	2.65224	3.32268	1.46182	3.43244	3.19486	19.8433	18.8821	14.4789	14.1393	19.8525
ENSOART00000000441.1	5.29543	3.66616	2.9774	3.94674	4.12944	3.95827	4.79545	6.53562	6.87373	3.94565	3.07979	3.81967	2.75651	4.03902	3.02662	5.25661	6.92212	8.49526	6.59616	8.9048
ENSOART00000000444.1	0	0	0	0	0	1.69606	0	0	0	0	1.41118	0.598836	0.773028	0.690975	1.35461	2.98672	8.06989	3.29073	3.13668	6.15167
ENSOART00000000457.1	7.58871	6.14068	3.15357	5.55434	5.79063	6.66998	6.10491	5.66521	5.32929	5.59251	5.51821	3.36822	2.36821	4.35662	6.37647	3.41934	7.77783	8.95576	6.38199	13.4928
ENSOART00000000445.1	2.36144	3.08138	2.07344	2.24298	2.49082	3.83317	3.21065	2.98658	2.58429	2.88945	0.763449	1.42629	0.631816	0.922187	0.420023	1.19959	2.39973	1.0104	3.1662	1.49183
ENSOART00000000447.1	85.7552	69.7765	46.3756	62.6164	58.1028	56.5683	58.8593	63.5732	63.6949	61.0757	42.701	33.0532	34.0014	41.5452	42.4672	81.4483	81.1366	123.549	65.5053	100.205
ENSOART00000000446.1	1.67504	0.948259	1.45112	2.57054	2.17525	2.91464	3.49245	1.32972	2.7342	1.63881	5.11045	3.1484	3.30551	1.70488	1.89928	1.47766	2.97545	1.90942	2.96829	1.83008
ENSOART00000000453.1	26.0081	25.3991	20.1711	22.6212	25.5807	15.7079	19.6006	25.8568	29.8526	28.6784	16.9307	13.3045	13.7199	14.4808	13.2985	42.9537	31.8703	49.4493	28.8344	26.0521
ENSOART00000000451.1	0	0	0.0181067	0	0	0.0166599	0	0	0	0	0	0.325917	0.24237	0.723643	0.479878	0.740333	0.319315	0.465564	0.143909	1.90851
ENSOART00000000452.1	0	0	3.05305e-06	0	0	1.26489e-06	0	0	0	0	0.411324	0.524736	2.7678e-06	0	5.15981e-05	4.56343e-05	1.26757	3.50989e-05	1.32381	0.000417071
ENSOART00000000450.1	0	0	0	0	0	0	0	0	0	0	0	0.901039	0	0	0	0	0	0	0	0
ENSOART00000000448.1	0.0283875	0	0	0	0	0	0.0246509	0	0	0	0.827327	0.530835	0.613069	0.495852	0.825728	0	0.172017	0.13319	0.170158	0
ENSOART00000000454.1	0	0	0	0	0	0	0	0	0	0	0	0	0	0	0	0	0	0	0.537765	0
ENSOART00000000455.1	0	0	0	0	0	0	0	0	0	0	0	0	0	0	0	0	0	0	0	0
ENSOART00000000460.1	34.0132	24.6788	17.8055	21.5853	20.7101	27.8776	29.2296	29.267	30.897	32.0057	18.7749	16.0774	14.2202	15.6778	16.482	26.6854	28.8032	26.9649	27.1157	34.4445
ENSOART00000000466.1	2.26771	1.29287	2.18072	2.98277	3.61996	2.35004	4.32609	2.86995	6.33292	3.40314	2.47651	4.10017	4.49269	2.01173	4.21613	3.8874	3.4617	9.7221	2.46539	2.69402
ENSOART00000000461.1	0	0	0	0	0	0.619984	0.171677	0.0194954	0.278917	0.0318118	0	0	0	0	0	28.4812	14.8241	38.881	15.143	9.98794
ENSOART00000000456.1	0.377863	0.215915	0.192313	0.220414	0.233227	0.297985	0.245831	0.310084	0.315075	0.156533	0.87066	0.822674	0.608715	0.586052	0.798278	1.36834	1.23327	1.81727	1.2372	1.65929
ENSOART00000000458.1	0	0	0	0	0	1.47771	0	0	0.254666	0.263191	0	0.529361	0.362919	0.237103	3.31362	1.23011	4.42104	2.45545	2.04408	3.12574
ENSOART00000000465.1	10.9138	8.15405	3.8829	4.58904	5.68468	2.57602	7.13742	7.92444	9.27305	9.89757	1.75229	2.26515	1.0501	2.1383	2.14385	3.47864	4.89714	2.42722	3.21494	7.01591
ENSOART00000000459.1	0.825895	0.404334	0.170329	0.258674	0.340454	0.563164	0.499275	0.625255	0.579451	1.02515	0.202824	0.284088	0.112605	0.228504	0.0809494	0.396247	0.637443	0	0.782984	0.515462
ENSOART00000000463.1	0	0	0	0	0	0.0145936	0.026086	0	0	0	0.0754664	0.0491674	0.0326348	0.0964478	0	0.505569	0.204663	0.461144	0.366928	0.289726
ENSOART00000000462.1	0.0221857	0.021743	0	0.0700568	0.0188451	0.129616	0.212181	0.0284264	0.0903355	0	0.0185203	0.0461655	0	0	0.0644574	0	0.035375	0	0	0
ENSOART00000000464.1	0.0402141	0	0.0420889	0	0	0.234685	0.0348396	0	0	0	0	0	0.0542983	0	0	0	0.179584	0.150934	0.10331	0.0850947
ENSOART00000000468.1	0	0	0	0	0	0.0461083	0	0.0101483	0	0	0.23833	0.356712	0.223405	0.188597	0.0533053	0.227812	0.289092	0.340502	0.405144	0.323326
ENSOART00000000479.1	0	0	0	0	0	0	0	0	0	0	0	0	0	0	0	0.0431177	0.0491062	0	0.113604	0
ENSOART00000000483.1	3.37897	3.69683	2.58701	3.43402	4.52449	4.34454	5.03238	4.48529	5.34296	4.38198	2.40209	2.37061	2.12488	2.20726	2.52273	6.70423	5.70707	9.53595	5.31022	6.8636
ENSOART00000000467.1	0	0	0	0	0	0	0	0	0	0	0.210242	0.186372	0.0944408	1.20391	0.257598	4.01061	1.72558	2.38391	1.76453	1.60332
ENSOART00000000469.1	0	0	0	0	0	0	0	0	0	0	0	0	0	0	0	0	0	0	0	0
ENSOART00000000470.1	0.149829	0.0982514	0.0880348	0.140958	0.11408	0.227091	0.217331	0.106701	0.101908	0.0522387	0.167497	0.139673	0.158725	0.0929233	0.0649131	3.64053	2.82583	5.17304	2.33551	2.86843
ENSOART00000000471.1	0.435519	0.43642	0.380322	0.362427	0.439646	1.26644	1.20561	0.745986	1.13128	0.553846	1.94243	2.85883	1.42896	2.12216	1.81524	9.46728	10.4868	7.3065	11.4307	9.01116
ENSOART00000000472.1	1.20873	1.64442	3.77366	2.84944	2.29798	3.16551	5.4645	4.09134	2.74015	2.09091	6.41082	5.8824	4.05171	5.34075	6.21071	5.78192	9.7634	8.44623	6.81227	12.7774
ENSOART00000000473.1	24.2216	28.0417	21.8877	19.3045	23.217	26.8216	30.0431	27.3956	25.662	28.2737	30.3034	29.2326	22.8595	22.4902	26.4987	33.7961	43.3347	36.8133	40.0673	39.714
ENSOART00000000474.1	31.0335	28.0363	15.7205	22.3056	25.4475	45.1181	53.7576	37.2601	47.9093	46.5796	24.4071	12.3048	20.3479	17.2582	20.9214	14.574	18.5073	21.7917	16.7821	25.4249
ENSOART00000000475.1	195.445	161.455	124.503	144.526	126.201	159.865	137.394	135.948	162.679	149.39	95.0684	80.3032	69.3571	70.5159	78.6056	144.345	141.05	136.198	132.69	104.494
ENSOART00000000476.1	0	0	0	0	0	0	0	0	0	0	0	0	0	0	0	0	0.119155	0.23855	0.111924	0.259767
ENSOART00000000478.1	0.235136	0.0384121	0.103598	0	0	4.67537	1.0568	0.502544	0.299465	0.164029	0.769606	0.571163	0.555331	0.54059	0.493147	0.353272	0.774814	1.87589	1.0907	0.71383
ENSOART00000000481.1	0	0	0	0.0430104	0	0	0	0	0	0	0	3.2488e-05	0	0	0	0	0	0	0	0
ENSOART00000000477.1	0	0	0	0	0	0.441967	0	0	0	0	0	0.158046	0	0	1.82242	1.10271	3.95068	0.878556	1.62253	4.22108
ENSOART00000000480.1	103.045	71.5619	42.4367	48.6874	49.5294	84.9152	77.2629	82.1937	87.5476	93.2621	19.84	14.3159	14.8707	16.8738	17.8546	38.4018	38.8628	33.8212	38.5319	44.9241
ENSOART00000000487.1	0	0	0	0	0.0269046	0	0.00913585	0	0.010715	0.0110002	0.0175862	0.0145843	0.0848734	0.0578626	0	0	0.00668514	0	0.00897795	0
ENSOART00000000482.1	0.0651102	0.318613	0.472462	0	0.32436	0	0.281046	0.247088	0.196107	0.269722	0.642444	0.537303	0.441251	0.658815	0.445063	0.311741	0.854274	0.734313	0.72639	0.136004
ENSOART00000000501.1	69.2271	73.7327	53.4177	72.6968	86.5813	63.4547	88.5569	76.5593	95.512	79.0452	29.1899	22.632	26.1833	27.693	26.2771	59.6853	41.5015	81.9452	37.7339	42.7656
ENSOART00000000485.1	0	0	0	0	0	0	0	0	0	0	0	0	0	0	0	0	0	0	0	0
ENSOART00000000493.1	58.8814	35.4936	18.7866	21.7967	26.8802	57.0083	50.3756	79.324	67.4296	59.8618	10.6499	8.67329	9.69556	10.5382	8.83058	7.40565	8.85927	10.5644	6.9608	6.57053
ENSOART00000000496.1	43.6996	27.0811	20.2097	30.3626	34.6458	76.6611	57.8604	68.6964	76.2357	72.6368	22.2153	13.4497	17.8022	19.737	17.0615	34.7902	20.1875	31.3653	25.643	19.1105
ENSOART00000000486.1	2.07324	1.24089	1.06877	1.0497	1.2126	2.13949	2.29128	3.03106	2.91939	2.20323	1.38062	1.42659	1.26407	1.21133	1.52677	4.96306	3.95136	6.44335	4.27291	4.57329
ENSOART00000000491.1	6.00298	4.87092	2.90371	4.39959	4.51552	4.27188	7.14087	4.22274	8.13409	7.12368	3.19647	2.91313	2.92924	3.03371	3.749	5.57347	8.24846	6.22253	9.39479	10.4517
ENSOART00000000484.1	6.93816	9.81768	2.95743	11.2661	9.55723	15.5807	17.9338	15.6075	14.5731	11.9563	14.8129	24.9699	11.7241	14.8222	6.63912	25.3784	42.6397	13.6619	39.6875	43.4637
ENSOART00000000495.1	41.2881	36.8095	18.2903	22.215	25.9682	25.0816	25.9257	23.4672	28.0404	27.4992	13.939	12.2871	13.1413	15.1557	14.1054	17.9971	24.9334	22.4634	22.8214	33.8462
ENSOART00000000489.1	0.869504	0.362	0.17449	0.675184	0.597305	0.207868	0.100125	0.0316714	0.0419544	0.0344536	1.47377	2.60334	1.68788	1.57724	1.52123	0.158001	0.222308	0.331148	0.245879	0.265515
ENSOART00000000497.1	54.3496	60.0224	39.2678	36.7486	40.3921	48.389	57.5772	62.3355	56.7989	57.8631	25.1474	21.8658	19.732	27.0771	21.6554	25.2689	25.5177	35.8866	23.8873	24.6438
ENSOART00000000490.1	0	0	0	0	0	0	0	0	0	0	0	0	0	0	0	0.224808	0	0	0	0
ENSOART00000000492.1	8.15872	15.0326	25.459	23.6426	27.9299	5.30859	6.56315	2.87684	4.58755	2.69629	42.6295	29.4166	28.0558	25.6727	35.999	3.95043	2.3554	6.87692	2.21664	3.12243
ENSOART00000000521.1	0.00440534	0	0	0	0.00378776	1.1254	3.70303	5.03288	4.40438	2.59909	0.213188	0.317802	0.285286	0.176339	0.267766	0.766987	0.954341	1.61323	1.09416	1.39305
ENSOART00000000531.1	0	0	0	0	0	0	0.325275	0.158251	2.24315	1.30974	0	0	0	0.113652	0	0.294528	0.079495	0	0	0.252865
ENSOART00000000488.1	0	0	0	0	0	0	0	0	0	0	0	0	0	0	0	0	0.0177125	0	0	0
ENSOART00000000494.1	0	0	0	0	0	2.21629	0	0	0	0	1.1909	1.35637	1.34873	3.40495	1.593	10.0458	8.96476	11.1429	8.67663	10.9836
ENSOART00000000498.1	4.20395	3.71622	2.45532	3.28051	2.64536	4.59599	5.16954	3.44606	4.06245	4.28723	3.01104	2.5715	2.42818	2.39674	2.77843	3.53962	5.26582	4.66943	5.13039	7.26584
ENSOART00000000500.1	24.7273	17.7836	10.6829	14.4528	15.9043	21.4027	21.3325	15.4222	18.9097	17.3087	14.2958	11.8683	10.5775	13.1508	14.4756	23.6036	30.2932	30.6238	32.1837	43.3841
ENSOART00000000499.1	9.50267	20.4121	22.0725	23.8054	20.0583	28.3588	26.181	18.2409	25.0874	21.055	12.3633	17.8334	18.7971	18.5589	14.5426	13.7769	24.7959	28.079	31.9899	31.5864
ENSOART00000000504.1	0	0	0	0	0	0	0	0	0	0	0.294802	0.830694	0.148473	0.514974	1.03761	2.8949	2.17277	2.39765	2.48234	4.35092
ENSOART00000000503.1	77.8279	76.7128	67.0823	68.1043	68.2274	62.6657	98.2567	84.1352	79.64	72.8407	75.3232	58.2904	58.6639	56.596	61.8451	68.3558	68.9726	68.3209	62.6874	71.5112
ENSOART00000000505.1	0.360182	0.376914	0.205129	0.239321	0.219471	0.334367	0.275392	0.230956	0.197575	0.159393	1.01777	1.28888	0.891901	1.73768	1.11471	9.26149	8.81924	13.2027	7.48919	7.15014
ENSOART00000000502.1	0.0350972	0	0	0	0	0	0	0	0	0	5.01361	4.78077	5.80458	5.3877	5.31488	14.985	29.9341	7.87085	23.6839	20.1872
ENSOART00000000506.1	0	0	0	0	0	0	0	0	0	0	0.18085	0.249968	0.271491	0.136801	0.239261	0	0	0	0	0
ENSOART00000000508.1	0	0	0.20611	0	0.041343	0.0961813	0	0	0	0	0.186942	0	0	0.104465	0.282984	0.0592122	0.0473526	0.556821	0	0
ENSOART00000000507.1	0	0.220295	0	0.117694	0.0468753	0.328311	0.43737	0.285075	0.226373	0.349796	1.85553	1.08438	2.51136	0.878544	1.75367	2.82817	2.82121	4.646	3.66221	3.18609
ENSOART00000000510.1	0	0	0	0	0	0	0	0	0	0	0	0	0	0	0	0	0	0	0	0
ENSOART00000000509.1	33.0948	26.7959	23.6891	17.4837	20.4098	54.379	44.4531	26.1043	25.8439	32.334	41.8801	34.7306	25.8221	27.8127	31.4045	66.5551	79.7068	128.525	60.2302	58.8414
ENSOART00000000519.1	16.9398	16.9805	13.056	16.2528	16.094	16.0044	16.9632	14.8825	16.2029	16.0212	10.0462	10.2183	9.84694	9.03054	10.0581	15.3242	21.4079	16.8947	20.7408	28.3392
ENSOART00000000512.1	6.14188	7.39315	4.87825	4.69972	5.13279	2.96476	4.99241	5.24301	6.48662	7.1883	6.5216	6.73915	5.67269	5.98031	8.33219	3.6006	3.62741	4.32475	3.50671	3.91511
ENSOART00000000511.1	0	0	0	0	0	0	0	0	0	0	0	0	0	0	0	0	0	0	0	0
ENSOART00000000524.1	0.0333036	0	0	0	0.0280844	0	0	0	0	0	0.0276627	0	0.0449306	0	0.0322989	0.0798876	0.0637017	0.124947	0.0285006	0.283198
ENSOART00000000516.1	40.4602	21.5679	15.6315	11.4091	14.695	18.6333	21.1981	24.5221	22.0743	23.7507	20.8017	17.2887	12.7114	19.6055	16.3365	44.1169	48.3225	25.9725	47.0982	48.4149
ENSOART00000000517.1	23.7849	7.66618	4.4094	8.12946	2.40482	17.0892	6.489	16.5836	3.94259	3.96524	19.7032	13.3179	21.0279	18.0386	17.2223	4.21963	5.48062	4.72511	6.35375	6.23215
ENSOART00000000513.1	0.227008	0.133391	0.663524	0.190289	0.760678	0.574064	0.471616	0.981244	0.962583	0.660266	7.24983	4.29145	5.02948	8.67785	9.09842	14.7378	15.8769	9.2435	17.9971	16.286
ENSOART00000000518.1	0.197451	0.17418	0.208769	0.041585	0.134374	0.749947	1.13359	0.582334	0.683962	0.619801	5.27977	7.07113	6.43534	5.0842	7.51153	6.66862	6.95131	5.0778	7.98093	6.76934
ENSOART00000000514.1	0	0	0	0	0	0.0819981	3.16006e-06	0	0	0	0	2.82782e-06	0	3.5462e-06	0.0325271	0	0.0324459	0.0299652	0.0301357	0.203784
ENSOART00000000515.1	0	0	0	0	0	0	0.024995	0	0	0	0	0.0255131	0	0.0339999	3.49894e-10	0	0	0	0	0
ENSOART00000000523.1	7.06658	6.70617	4.25351	5.87893	6.43521	8.38877	9.3305	8.70806	8.73184	8.48723	4.42791	4.10291	4.3987	4.58312	4.52001	4.85271	6.38263	4.99672	6.01182	7.90833
ENSOART00000000520.1	0	0.0632997	0	0.067589	0.107479	0	0	0	0	0.0669872	0	0	0.043794	0.118946	0	0.232117	0	0.121492	0	0.135157
ENSOART00000000522.1	26.6006	25.7949	19.5618	23.3054	25.2207	21.6272	27.9113	25.2958	24.9524	23.7016	16.4818	15.5014	16.5876	14.7608	15.5418	16.1317	21.9596	18.7837	21.975	24.2532
ENSOART00000000528.1	46.8456	33.0233	25.9111	38.296	49.2532	60.7443	73.0014	49.0962	74.0383	59.6804	35.3732	40.87	41.2606	45.7925	45.6734	57.805	76.1507	75.8203	60.0464	83.7426
ENSOART00000000529.1	35.7511	32.909	19.796	27.455	24.9483	44.7572	58.4055	37.2001	33.0847	27.8295	56.9677	69.4729	60.3914	55.4316	50.3394	52.6607	79.1018	80.6838	72.4167	88.6031
ENSOART00000000526.1	0.284068	0.263155	0.204555	0.32269	0.268602	0.405127	0.372914	0.314742	0.331454	0.259723	0.534607	0.573818	0.462084	0.523812	0.562464	0.742519	1.13028	1.06623	0.816406	1.16709
ENSOART00000000533.1	20.86	23.7085	13.0533	14.3432	16.826	13.6214	21.9221	17.8448	20.7068	19.7299	6.43876	5.95716	5.92229	6.86956	6.71805	11.2699	16.5815	11.7689	15.8748	18.7255
ENSOART00000000525.1	0	0	0	0	0	0	0	0	0	0	0	0	0	0	0	0	0	0	0	0
ENSOART00000000532.1	23.5069	16.7563	11.1521	12.8719	17.9365	17.6646	20.6336	15.1292	23.369	22.7332	7.09557	6.14285	6.68135	7.37384	8.26798	19.0029	20.8426	14.0425	20.3005	23.6368
ENSOART00000000530.1	0	0	0	0	0	0	0	0	0	0	0.0505236	0.0559547	0.190431	0.037074	0.702511	0.121131	0.0257123	0.0189192	0.034524	0
ENSOART00000000527.1	0.224756	0.121582	0.183631	0.18375	0.229606	0.165261	0.472342	0.240713	0.380357	0.180069	0.604737	0.456178	0.336906	0.298582	0.621589	0.625494	0.74569	0.823544	0.749347	1.30675
ENSOART00000000540.1	0.574516	0.405312	0.409662	0.31182	0.366603	0.686573	0.774769	0.494917	0.620435	0.405681	2.43169	1.91688	1.95375	1.80347	2.2647	4.59211	5.13252	5.98013	4.09969	5.34736
ENSOART00000000539.1	0	0	0	0	0	0	0	0	0	0	0.166685	0.179982	0.174999	0.0917273	0.0772467	0.0239764	0	0	0	0
ENSOART00000000536.1	4.92497	4.91384	3.06195	3.68469	5.41787	5.79597	8.41938	10.4171	7.99879	4.90208	4.84982	6.26198	6.35573	8.40949	4.92922	2.34106	2.03807	3.59779	1.60673	3.85485
ENSOART00000000537.1	0.73508	0.409831	0.324735	0	0.343057	0.394896	0.574177	0.334968	0.455842	0.309775	0.308061	0.68859	0.284051	0.12691	0.409502	0.638848	1.12936	1.1231	1.39753	1.43164
ENSOART00000000538.1	57.7634	65.977	61.4838	61.7301	61.3792	45.2245	57.5191	58.1446	60.9124	60.0502	44.2755	40.9178	38.5611	42.3289	46.0054	77.3735	79.2874	85.2333	82.9892	71.139
ENSOART00000000534.1	0	0	0	0	0	0	0	0	0	0	0.0476803	0	0.0193243	0	0.0277638	0	0.0110447	0	0	0
ENSOART00000000535.1	73.8035	30.6627	43.9147	48.1692	64.725	70.2047	73.4179	62.8931	105.024	116.788	38.7324	30.5312	36.4787	49.6993	68.9228	79.151	103.971	74.0398	81.4712	103.511
ENSOART00000000545.1	1.32965	1.19715	0.811823	0.989268	1.09613	1.62181	1.97685	1.77726	1.91819	2.0224	0.604141	0.531101	0.637236	0.561523	0.554327	0.962304	1.35753	1.41207	1.29432	1.60018
ENSOART00000000541.1	0.0102868	0	0	0	0	0.0100281	0	0	0	0	0.00864713	0.0107472	0.0381676	0	0.0248254	0	0.0196781	0.0193166	0.013215	0.0333595
ENSOART00000000542.1	0.485761	0.100209	0.0808554	0	0.0216725	1.14489	0.133281	0.327229	0.259947	0.133517	6.77759	3.50833	3.07114	15.4201	5.30199	10.7769	12.3199	7.9175	13.3328	10.4264
ENSOART00000000544.1	0	0	0	0	0	0	0	0	0	0	0.133359	0.108881	0.117309	0.0917038	0.114071	0.210287	0.212498	0.50958	0.221263	0.387596
ENSOART00000000550.1	0	0	0	0	0	0	0	0	0	0	0	0.0428571	0.0277851	0.0189323	0.0199323	0	0.0196959	0	0.0176303	0.0440915
ENSOART00000000546.1	29.7932	17.2845	12.6761	13.3626	12.0211	31.913	31.0651	38.4091	31.4422	28.0589	21.0176	17.3135	14.1971	21.6332	15.8711	70.9146	58.3956	82.6164	76.4015	68.333
ENSOART00000000547.1	0	0	0	0	0.0110269	0	0	0	0	0	0	0.0179481	0	0	0.0249593	0.0310602	0.0288126	0	0	0
ENSOART00000000549.1	0.325109	0	0	0.345378	0	0	0	0	0	0	0	0	0	0.309655	0.674143	0	0.111418	0	0	0
ENSOART00000000548.1	0	0	0	0	0	0	0	0	0	0	0	0.229431	0.239076	0	0.674143	1.77131	0.568001	1.03129	0.36122	2.22085
ENSOART00000000560.1	2.5506	1.92975	2.65894	2.80631	3.33312	1.75276	2.49551	1.88746	2.21444	1.70355	3.40049	3.22062	3.47503	3.62568	4.43173	2.18226	3.34995	3.25963	2.76254	3.89837
ENSOART00000000553.1	4.75888	5.281	3.84852	6.48171	5.38818	3.70367	6.21999	5.27908	6.79798	6.17773	6.99194	6.20259	6.89074	6.4331	6.0743	8.70454	15.4876	7.84086	18.1477	17.5796
ENSOART00000000551.1	0	0.268739	0	0	0	0	0	0.11081	0.00540829	0	14.5951	17.5714	13.3653	7.38415	12.6956	7.8983	9.72405	12.6014	8.1856	6.16761
ENSOART00000000554.1	70.1025	48.6605	32.2363	48.8655	48.7421	54.1507	80.2897	76.606	80.9377	69.5027	28.5114	22.6074	24.9614	25.9342	22.2786	13.6279	12.4678	25.958	12.2201	12.2963
ENSOART00000000552.1	0.037214	0.0103522	0.0168204	0.0326203	0.0179716	0.0375951	0.0480515	0.0416717	0.0113276	0.0113951	0.108678	0.0859263	0.0721579	0.0441895	0.0721856	0.107486	0.121363	0.103005	0.0132796	0.161046
ENSOART00000000559.1	7.49535	5.98678	4.75497	5.629	6.09749	4.58019	7.88119	8.63826	9.35865	8.18326	3.51085	4.20946	4.65793	4.33648	4.55876	5.77053	7.53927	6.68521	7.82034	9.18139
ENSOART00000000555.1	0	0	0	0	0	0.0203857	0	0	0	0	0.429892	0.603885	0.50809	0.606186	0.505357	2.41687	3.98535	1.23723	5.65229	6.35616
ENSOART00000000556.1	168.524	102.019	70.0329	77.3792	86.8495	137.143	125.687	132.37	160.768	171.662	114.332	83.7541	77.0792	95.3149	104.736	150.089	132.31	129.552	133.844	140.731
ENSOART00000000557.1	0.0660239	0	0	0	0.746331	0.0189011	0.00845226	0	0.0765645	0.0993039	0.0813648	0.122688	0.130849	0.0802893	0.57612	0.26845	0.472237	0.736321	0.415246	1.00352
ENSOART00000000562.1	73.5643	53.8397	40.5392	46.2157	35.9059	49.4754	52.5494	52.0179	55.8456	64.4725	39.6506	33.0209	29.011	27.254	29.2168	33.1385	37.4216	26.6561	37.2154	40.0229
ENSOART00000000558.1	0.327299	0.0644831	0.0232364	0.0232643	0.0472839	0.0107292	0	0	0	0	0.204049	0.169382	0.258909	0.275798	0.266992	0.14563	0.234608	0.476066	0.159495	0.118321
ENSOART00000000564.1	0	0	0	0	0	0	0	0	0	0	0	0	0	0	0	0	0	0	0	0
ENSOART00000000561.1	0.799545	0.628638	0.453786	0.592466	0.576487	0.581141	0.920157	0.650358	0.631736	0.372858	1.07534	0.99862	0.832937	0.821458	1.38162	0.880043	1.55205	1.45814	1.0991	2.20036
ENSOART00000000563.1	0	0	0	0	0	0	0	0	0	0	0	0	0	0	0	0	0	0	0	0
ENSOART00000000565.1	0	0	0	0	0	0	0	0	0	0	1.73032	1.90878	1.83728	11.0279	2.95541	2.55879	3.07056	1.70184	2.35569	2.55392
ENSOART00000000566.1	0.167282	0.210926	0.355883	0.319444	0.286651	0.590063	0.645926	0.492135	0.497093	0.351334	1.25073	1.7853	0.886723	1.04799	1.4772	4.94844	5.30817	5.61466	2.09438	3.14613
ENSOART00000000567.1	0.12202	0	0	0	0	0.238776	0.211167	0	0.122326	0	3.2803	2.61559	3.12995	3.52323	2.30553	2.94528	2.66308	2.78164	2.98405	3.03438
ENSOART00000000572.1	0.287958	0.305933	0.195693	0.194148	0.260421	0.241681	0.258045	0.175018	0.171838	0.176393	1.26933	1.16914	1.34909	3.00981	1.96233	3.54374	3.71072	4.87373	3.12377	3.9532
ENSOART00000000590.1	6.86598	5.43554	4.45838	5.74249	7.00825	6.01787	8.04647	8.87053	9.07715	7.95713	7.1504	6.34558	6.27778	6.03718	6.36845	10.5414	11.7181	11.4448	10.5186	14.1321
ENSOART00000000568.1	2.13114	2.73314	2.58933	3.77263	4.49421	4.39233	5.35419	3.28452	4.55165	3.94903	3.10143	3.74232	4.11575	4.2432	3.31063	2.30862	3.09387	5.33306	4.56265	1.92182
ENSOART00000000569.1	1.49487	0.775517	2.2157	1.65249	1.44713	7.27303	5.63688	4.9557	6.67479	5.27592	17.7307	18.4493	10.7414	5.9265	13.5599	56.5065	57.9079	64.5735	15.7679	36.8806
ENSOART00000000570.1	0	0	0	0	0	0	0	0	0	0	0	0	0	0	0	0	0.0146646	0	0.0783474	0
ENSOART00000000571.1	4.99973	2.94896	1.06386	1.50247	1.98818	5.73575	3.01425	3.03258	2.26775	1.5601	8.7187	7.1104	5.71524	6.68006	6.96025	6.88879	8.31187	9.14838	12.1755	7.86119
ENSOART00000000575.1	13.2233	9.61203	9.91333	11.8279	10.249	13.8789	18.8045	20.662	20.893	16.6294	12.7734	12.174	10.4009	11.7729	11.4172	18.0663	25.9697	20.2441	25.1135	30.2131
ENSOART00000000594.1	0.0105326	0	0	0	0	0.238203	0.0920312	0.0590942	0.0558806	0.0304588	0.403697	0.790748	0.48668	0.371176	0.444745	1.60264	1.95982	2.25532	1.74594	1.92554
ENSOART00000000602.1	0.0028651	0	0	0.0042402	0	0.0260817	0.0617374	0.0201878	0.0199093	0.0082862	0.151619	0.177375	0.0958557	0.194789	0.14997	0.341098	0.557093	0.835461	0.488348	0.733013
ENSOART00000000573.1	0.0896047	0.0630077	0.105626	0.0434422	0.0642845	0.0963245	0.0326688	0.0363843	0.0145279	0	2.90545	3.1332	0.769957	2.75294	3.38576	4.61913	8.30891	2.96752	9.47754	11.3264
ENSOART00000000574.1	12.9588	8.27814	6.30268	6.99901	10.6322	13.2395	13.4956	12.1286	17.216	19.2762	3.57289	2.62284	2.9319	3.14626	3.4278	9.59915	9.05045	8.04183	8.63001	10.7258
ENSOART00000000583.1	0.00195947	0.00042227	0.001312	0.0012083	0.00142604	0.00131345	0.00246555	0.00176899	0.00238619	0.00124613	0.4236	0.00291266	0.000583523	0.00197071	0.00281729	0.658511	4.03831e-06	0.870016	0.00112638	0.00753859
ENSOART00000000589.1	0.279574	0.245358	0.186634	0.192852	0.256101	0.284905	0.403365	0.299135	0.32051	0.200488	0.0466259	0.515805	0.367771	0.353694	0.492475	0	0.860337	0.0403594	0.450157	0.931056
ENSOART00000000576.1	6.45788	5.46641	4.16116	5.08457	6.47775	6.04431	8.31016	6.31555	7.36078	6.21447	3.90595	3.54311	3.79075	2.96807	4.46313	2.8623	5.17186	5.0716	6.16141	5.88482
ENSOART00000000577.1	0	0	0	0	0	0	0	0	0	0	0	0	0	0	0	0	0	0	0	0
ENSOART00000000580.1	0.105936	0.14543	0.101281	0.234658	0.126871	0.0929101	0.129815	0.136236	0.129928	0.0889249	3.48301	6.97078	5.84645	3.83147	4.43257	0.293224	0.501054	1.11438	1.28613	0.760378
ENSOART00000000584.1	0	0	0	0	0	0	0	0	0	0	0	0	0	0	0	0	0.605602	0	2.09472	0.1545
ENSOART00000000579.1	60.3132	79.2319	121.517	117.619	147.872	135.733	134.172	102.607	105.668	118.749	109.288	87.9386	88.774	135.491	106.609	129.68	59.0258	98.0246	88.5014	63.0238
ENSOART00000000578.1	0.0294715	0	0	0	0	0.344194	0.0255867	0	0	0	1.10384	1.12233	0.895067	1.02953	1.60055	2.12242	1.77648	1.46569	1.69083	2.32277
ENSOART00000000581.1	1.23164	1.27702	1.4992	1.72566	1.50224	2.0048	1.7214	1.11354	1.06969	0.505449	2.61618	5.56828	2.63552	4.57068	4.3496	9.32212	17.885	11.7674	15.9359	23.4321
ENSOART00000000582.1	0	0	0	0	0	0	0	0	0	0	0	0	0.14341	0	0	0.243567	0.467463	2.12913	0.179154	0
ENSOART00000000585.1	0	0	0	0	0	0	0	0	0	0	0.286779	0.347076	0.105784	0.17289	0	0.376108	0.449897	0.882385	0.91262	0.600267
ENSOART00000000587.1	0	0	0	0	0	0	0	0	0	0	0	0	0	0	0.0955151	0	0	0	0	0
ENSOART00000000606.1	7.24638	6.4718	4.53905	5.19359	6.02422	2.85174	5.71585	6.52881	4.54358	4.6251	5.22923	4.35716	3.63463	3.56984	4.02927	1.84322	2.25143	2.29665	2.84468	2.76775
ENSOART00000000614.1	1.20817	1.49844	0.724329	0.891436	1.0868	0.530537	0.78029	0.613964	0.804122	0.512719	0.883539	0.882819	0.853711	0.783177	1.00055	0.453332	0.541812	0.478593	0.323078	0.203142
ENSOART00000000588.1	6.19238	4.70484	5.09421	4.5136	3.57825	2.45398	3.25589	3.0913	3.69128	2.56113	5.36826	5.1348	2.6679	3.47807	5.70335	3.11662	5.86542	3.47358	2.66463	5.22483
ENSOART00000000595.1	2.44088	2.93128	1.92459	1.89361	2.24634	2.22395	1.90261	2.21539	2.1897	2.35252	3.31302	4.24545	2.35733	3.39917	3.35612	4.11149	7.63098	4.44356	5.78698	7.57567
ENSOART00000000591.1	0	0	0	0.0251525	0	0	0.0207756	0	0.024318	0.0499588	0.119642	0.0331462	0	0.109894	0.0231569	0	0.030492	0	0	0.153268
ENSOART00000000593.1	0	0	0	0	0	0	0	0	0	0	0	0	0	0	0	0	0	0	0	0
ENSOART00000000592.1	0.866791	0.871487	0.767071	0.965385	0.7043	0.54038	0.935549	0.592095	0.605862	0.586997	1.8726	1.99919	2.15733	1.81835	1.91326	1.8215	2.2713	3.88588	2.1514	1.69224
ENSOART00000000598.1	0	0	0	0	0	0	0	0	0	0.0202481	0	0	0	0.0177939	0	0.0232571	0.00617016	0.0181606	0.0331393	0
ENSOART00000000599.1	32.0935	27.2869	19.6196	25.8936	26.9328	33.3995	41.075	28.2419	33.0968	31.3719	23.7494	22.0026	21.7725	21.2899	24.3516	27.5129	38.056	43.2027	37.0745	53.4635
ENSOART00000000620.1	21.0428	18.6955	9.41646	14.2856	15.5738	24.465	28.2092	22.922	25.6557	23.7246	10.4167	9.38148	8.98554	9.99705	10.2864	15.3226	23.7644	19.5943	19.6009	30.3388
ENSOART00000000596.1	0	0	0	0	0	0	0	0	0	0	0	0	0	0	0	0	0	0	0	0
ENSOART00000000597.1	5.04253	4.19528	3.29629	4.11024	4.39236	3.68561	4.61377	3.31544	3.6937	3.66293	4.87195	3.6861	2.76011	2.76466	4.26997	4.17247	5.84562	4.54885	4.85033	8.56738
ENSOART00000000600.1	20.3754	1.10586	4.74772	5.87894	1.86459	9.72167	35.9981	5.56779	4.77452	12.67	183.461	151.437	360.602	160.625	156.36	28.2619	40.8688	21.6041	31.4914	31.9161
ENSOART00000000605.1	0.534485	0.407461	0.251159	0.270994	0.304243	0.674753	0.724024	1.16764	1.31223	1.09894	0.975933	1.20901	1.04191	1.01945	1.05394	1.21341	3.34292	1.71152	2.89881	1.31488
ENSOART00000000601.1	0	0	0	0	0.147856	6.58012	3.78773	1.36898	1.46336	0.378523	2.51261	2.16648	2.20634	0.85473	2.19438	1.10313	2.90582	4.55287	3.72471	2.635
ENSOART00000000603.1	0.0611169	0.0591207	0.0212172	0.0425038	0.0344032	0.0788309	0.283525	0.260353	0.265792	0.23098	0.185	0.167489	0.203941	0.110821	0.214112	2.1069	1.85091	2.68402	0.74827	1.59628
ENSOART00000000604.1	0	0	0	0	0	0	0	0	0	0	0	0	0.020121	0	0	0	0	0.0279747	0.0255287	0
ENSOART00000000609.1	0	0	0	0	0	0	0.0578676	0	0	0	0.259284	0.430878	0.47908	0.040801	0.494173	0.346528	0.643825	0.874507	0.683945	0.332272
ENSOART00000000607.1	0	0	0	0	0	0	0	0	0	0	0	0	0	0	0	0	0	0	0	0
ENSOART00000000608.1	0	0	0	0	0	0	0	0	0	0	0	0	0	0	0	0	0	0	0	0
ENSOART00000000610.1	13.5959	7.5505	7.14878	4.86223	7.50395	3.28401	3.52513	2.1898	3.05011	2.77723	4.31363	3.78715	4.1884	7.24598	4.8739	7.85898	9.14249	7.51299	10.0855	12.2682
ENSOART00000000615.1	19.0741	12.5373	6.81252	10.7523	11.8028	14.7122	10.8266	15.8379	12.4976	14.3293	7.76712	7.40139	5.85159	7.25749	7.80633	8.20436	11.2252	10.5567	10.8196	13.6552
ENSOART00000000611.1	0.0656509	0.128488	0	0.0686075	0	0.255586	0	0	0.0659131	0	4.58705	6.18505	6.45282	6.94618	6.02622	50.447	80.2731	45.4168	80.3506	105.032
ENSOART00000000613.1	0	0	0	0	0	0	0	0	0	0	0.316382	0.502823	0.233731	0.318279	0.201649	2.49173	2.4738	3.7363	3.14303	3.01391
ENSOART00000000612.1	0	0.0678358	0.0363374	0.0363557	0.0291919	4.04281	3.90432	1.85618	1.08768	0.721377	1.23677	2.82539	2.0802	1.27312	2.4534	1.70268	2.57319	4.25613	2.93547	4.19007
ENSOART00000000617.1	0	0	0	0	0	0	0	0	0	0	0	0	0	0	0	0	0	0	0	0
ENSOART00000000616.1	0	0	0	0	0	0	0	0	0	0	0	0	0	0	0	0	0	0	0	0
ENSOART00000000619.1	3.50396	3.60436	2.58588	3.48741	3.5878	21.0754	16.5812	21.9257	22.4627	17.0248	6.98345	7.21629	5.48229	9.87951	8.6279	47.2778	47.2854	45.645	38.4807	36.3548
ENSOART00000000618.1	0.117886	0.0288736	0.0930207	0.12392	0.124621	1.95043	2.81454	1.7707	1.97502	2.05996	0	0	0.0795615	0	0	0.0353737	0.0563962	0.055309	0.0757089	0.188332
ENSOART00000000621.1	22.1797	15.5185	7.95619	11.0827	10.6234	41.9821	55.1635	22.3012	45.5066	41.623	7.00906	6.08902	7.36836	4.99861	5.01655	93.8774	175.885	37.5084	193.605	212.512
ENSOART00000000623.1	4.14161	2.09956	2.45892	2.46533	2.23077	5.01253	8.74718	2.92044	8.64055	8.25513	2.84368	1.70922	1.88597	0.970064	1.13948	7.96338	12.5918	7.12503	14.4284	17.4351
ENSOART00000000622.1	111.973	94.1918	58.4775	63.1804	64.7206	99.5277	122.543	72.7118	95.2088	96.1627	34.8407	33.6475	29.9758	33.3225	32.6028	81.1082	126.784	57.2111	140.611	142.495
ENSOART00000000624.1	88.7397	74.4502	51.6064	52.9092	56.3734	99.3234	95.711	59.9747	79.9091	80.3685	30.6252	30.4284	27.5839	27.9251	29.5145	48.3235	77.3973	47.5301	75.9319	88.2673
ENSOART00000000629.1	53.3042	37.374	25.0298	32.8359	35.0077	49.4874	51.296	55.7092	53.868	50.6408	30.0083	23.1431	24.148	27.4014	26.1749	60.2853	59.7319	63.7701	58.3425	58.8181
ENSOART00000000630.1	0.020015	0.0686939	0	0	0	0	0.0668427	0.14815	0.157041	0.120862	0.0322382	0.0533782	0.206522	0.0704381	0.0613657	0.537555	0.222709	0.667877	0.458885	0.332007
ENSOART00000000636.1	0	0	0.0287465	0	0.0462839	0.0132027	0.0747822	0.461218	0.0504955	0.0354025	0.206154	0.0879073	0.250629	0.477999	0.545748	1.55464	0.895306	2.21223	0.956918	0.688108
ENSOART00000000625.1	4.83513	4.58912	3.2028	2.52992	3.0906	2.58766	7.12673	2.65709	4.83933	4.17796	2.84926	2.50901	2.25506	3.35163	2.67385	4.28672	6.13564	5.03637	5.37604	6.16277
ENSOART00000000628.1	0.993983	4.62843	5.01773	4.99222	6.35394	1.42007	2.17736	1.04195	1.62208	0.832844	8.13642	11.1728	8.22709	5.98791	11.7315	1.91233	2.91071	3.15663	2.46853	2.95199
ENSOART00000000626.1	2.17601	0.33596	0	0.119441	0.0933134	0.111589	0	0.143661	0	0.118364	0	0.0789884	0.157518	0.212058	0	1.64877	0.533716	0.541214	1.88693	0.945175
ENSOART00000000627.1	0.0242034	0	0.0255327	0	0	0	0	0	0.0738615	0.0252904	0.0403762	0.067119	0.0653335	0.0445084	0.0234488	0.523296	0.941674	1.88527	1.69953	0.982696
ENSOART00000000631.1	0.00966092	0	0	0	0.00826884	1.44992	0.741011	3.1194	2.4397	1.57168	0.154015	0.248695	0.149911	0.133313	0.14001	0.337211	0.819368	0.199533	0.446782	1.04144
ENSOART00000000634.1	24.7816	12.8665	7.82058	10.0005	9.02918	22.4924	19.4184	20.0639	18.8948	21.3864	12.3618	9.0999	8.90462	8.94423	9.34937	10.5677	11.1321	9.8819	11.6403	12.7947
ENSOART00000000632.1	13.9288	9.91166	6.91207	7.05684	8.72168	10.9467	14.6991	16.1094	18.6329	18.4308	7.48042	5.66786	5.3167	8.26179	7.04036	10.6862	8.57021	10.1846	9.43394	7.77454
ENSOART00000000633.1	0	0	0	0	0	0	0	0	0	0	0	0.0119485	0	0	0	1.00303	0.435309	0.992267	0	1.001
ENSOART00000000635.1	0	0	0	0	0	0	0	0	0	0	0	0	0	9.61403e-10	4.41676e-08	0	0	0	0	0
ENSOART00000000637.1	0.0744064	0.0399556	0.0897661	0.0643097	0.0921555	0.0474867	0.11063	0.0288725	0.0770603	0.0141522	0.197406	0.158565	0.132406	0.178486	0.144144	0.212614	0.205393	0.64302	0.300707	0.208443
ENSOART00000000638.1	5.24477	1.95806	1.92274	2.42632	2.67908	2.45071	2.58847	1.70331	2.36475	2.74768	5.51382	5.57197	4.36179	10.0686	7.18131	4.10734	2.42594	7.9142	6.45002	2.32587
ENSOART00000000641.1	0	0	0	0	0	0	0	0	0	0	0	0	0	0	0	0	0.125705	0	0.842465	0
ENSOART00000000644.1	10.3765	10.1202	4.79785	9.96015	9.84413	10.5331	9.89359	8.68893	10.5289	10.7128	5.53675	3.25568	2.19037	4.06951	5.57483	3.10102	4.71283	6.87656	4.10594	6.09376
ENSOART00000000645.1	0.751815	1.35035	0.775209	0.393668	0.613961	0.36755	0.433729	1.10243	0.753283	0.25964	0.20397	0.0865293	0.0867832	0.116391	0.372665	0.453237	0.855441	0.593662	0.655188	1.03823
ENSOART00000000640.1	7.19905	6.55559	4.84467	5.2466	5.46533	6.63179	6.42159	6.83926	7.22493	7.28493	5.32363	4.8156	4.04364	3.83454	4.70609	7.45578	8.08819	6.42375	6.66525	9.96328
ENSOART00000000639.1	0.216914	0.0773069	0.193747	0.22089	0.0664911	0.0584334	0	0	0.041797	0	0.422756	0.807468	0.673839	0.426039	1.11522	1.75516	3.31386	4.50626	1.86396	3.54217
ENSOART00000000642.1	0	0.0101149	0.0219184	0.010881	0.00882526	1.34699	3.461	1.2338	1.94006	2.59785	0.181706	0.301371	0.236617	0.151826	0.179411	0.0621558	0.0986943	0.106521	0.0795057	0.266763
ENSOART00000000643.1	0	0	0	0.0614783	0	0.0571849	0	0	0.0590992	0	0.145314	0	0.238704	0	0.286559	0.914764	0.638832	0.82796	0.352702	0.369454
ENSOART00000000646.1	230.347	170.766	119.571	117.925	116.019	204.648	210.559	160.632	195.14	201.891	61.3494	54.3122	60.9493	63.9271	59.4418	141.512	197.737	127.941	191.516	171.827
ENSOART00000000647.1	15.6285	9.53908	8.05904	9.39622	9.96067	13.5158	12.055	17.8427	24.987	23.7614	9.13732	8.3052	6.763	10.1916	8.14275	12.7069	17.4919	8.50654	20.3651	15.7678
ENSOART00000000649.1	0.0215057	0.0421545	0	0	0	0.0628246	0.224406	0	0.0656905	0	0.215491	0.537094	0.420853	0.217533	0.624736	0.335939	0.349762	0.504593	0.313076	0.552378
ENSOART00000000660.1	0.0376826	0.0246388	0	0	0.00538655	0.0795863	0.0054778	0.0808791	0.0128574	0	0.939291	1.3688	1.21176	0.982323	0.933859	3.71333	4.25708	6.01449	4.14165	4.4912
ENSOART00000000648.1	18.1088	9.26374	15.9863	18.3266	36.8083	12.993	4.15064	10.3911	7.42916	10.0952	63.0029	44.6965	49.5193	90.1749	87.8498	202.235	169.824	169.144	154.436	137.215
ENSOART00000000676.1	31.1039	28.2501	20.1124	27.4286	32.9328	29.8119	51.6077	37.5853	47.4948	37.1895	14.6494	13.4872	15.6123	14.4499	13.9056	11.8402	9.1734	12.716	8.2593	7.89794
ENSOART00000000650.1	0.578327	0	0	0	0	0.282817	0.250862	0.360588	0.588797	0	125.178	135.807	113.103	88.8443	117.254	191.208	153.321	152.746	186.08	122.961
ENSOART00000000651.1	3.10056	1.57722	1.66212	2.03691	6.10028	2.90146	2.74343	3.20099	7.71829	6.09534	0.967613	1.85766	1.44871	1.69921	2.34206	3.3635	3.7653	2.8814	2.5784	3.93649
ENSOART00000000652.1	0.928749	0.751742	0.569228	0.768411	0.782906	1.07417	1.50229	1.39595	1.42074	0.693488	1.67077	1.89703	1.38887	1.24303	1.66357	1.81792	1.95933	2.14963	1.40888	2.57405
ENSOART00000000657.1	2.45227	2.41298	1.38286	1.32863	1.38875	4.45938	4.68504	4.10923	4.67179	4.77841	0.960311	0.962187	1.03262	0.749502	1.04125	1.37702	2.06227	1.50652	1.99446	3.35614
ENSOART00000000653.1	1.18252	0.865561	0	0.312912	0.239957	0	0.257165	0.739262	0.300888	0.931821	2.14271	2.07866	2.79543	2.50544	3.94401	1.08894	1.10692	1.16447	2.42905	0.615146
ENSOART00000000655.1	0.141125	0.155026	0.126249	0.119195	0.217954	0.0385199	0.0344693	0.0508974	0.0173386	0.0474573	1.03424	1.03393	0.685475	0.405119	1.16626	0.217542	0.867491	0.789705	0.522134	0.463619
ENSOART00000000654.1	149.683	155.962	121.214	150.232	157.818	95.8237	76.55	112.671	112.081	97.6832	103.027	80.9808	84.6288	111.182	90.7311	194.771	133.644	277.461	139.922	119.651
ENSOART00000000656.1	0	0	0	0	0	0	0	0	0	0	0.072596	0	0	0.0820904	0	0.213388	0.171763	0	0	0
ENSOART00000000659.1	0.379338	0.48111	0.42412	0.563682	0.511721	0.217274	0.368604	0.514613	0.613263	0.559911	0.745057	0.882188	0.873355	0.677107	0.79959	2.60054	1.93553	2.60056	1.58599	1.24119
ENSOART00000000658.1	27.8752	47.7865	36.8803	40.352	36.2985	29.6125	27.1873	27.8998	32.0234	29.7127	17.3812	15.2097	17.5175	18.0866	13.3851	9.92313	16.4044	21.2603	17.9986	17.1517
ENSOART00000000666.1	0.613387	0.455328	0.370899	0.42447	0.454856	0.659886	0.832296	0.653662	0.712995	0.425373	1.13728	1.19385	0.956385	1.18579	1.197	1.49738	2.04431	2.49766	1.86043	2.49383
ENSOART00000000661.1	18.7589	8.71059	5.90247	9.81194	8.56689	12.3053	11.7757	18.533	13.8935	12.9577	12.7528	11.2585	1.13098	1.37357	6.39633	32.358	20.1702	1.39072	4.17912	13.8038
ENSOART00000000662.1	17.0722	11.9059	5.44876	6.16253	5.13249	42.0702	41.7965	47.9573	37.4614	38.3546	19.0206	14.1694	4.68376	13.8683	6.04691	44.271	39.4453	5.62393	27.3388	20.9735
ENSOART00000000663.1	0	0	0	0	0	0	0	0	0	0	0	0	0	0	0	0	0	0	0	0
ENSOART00000000665.1	0	0	0	0	0	0	0	0	0	0	0	0	0	0	0	0.0209521	0.038899	0	0.0746183	0.149574
ENSOART00000000668.1	59.6585	45.857	35.756	40.9001	45.5101	57.5427	59.9764	53.7409	67.6118	69.2883	34.1693	26.6975	30.3616	45.6094	37.0362	119.312	114.391	135.871	117.33	117.469
ENSOART00000000670.1	6.37907	6.27446	4.9432	6.21742	9.32988	4.10238	6.11763	3.73828	7.30481	5.60907	3.12264	2.97057	4.14595	5.02138	3.64836	12.1024	7.70938	12.0838	6.43013	6.54179
ENSOART00000000669.1	26.9376	21.8664	10.7858	16.8572	16.605	25.92	27.1934	28.6746	24.4101	26.8554	14.431	11.3405	12.8784	12.5386	13.7606	15.0107	18.625	16.9902	16.0355	22.2531
ENSOART00000000667.1	34.8176	9.31622	2.25345	4.26038	2.89073	30.8222	9.67296	34.4127	14.4365	21.1284	96.1023	110.824	147.618	192.767	227.435	8.42613	12.6198	21.3452	8.56576	2.44957
ENSOART00000000673.1	18.5498	13.9631	8.83628	10.9331	11.6579	11.581	17.2096	18.1206	17.2826	16.7374	9.34667	7.39811	8.36267	8.30082	7.71667	13.0379	14.7113	11.474	15.0303	14.6453
ENSOART00000000671.1	0.014095	0.0286376	0.0150509	0.0292668	0.0243569	0.265617	0.0988849	0.0758452	0.0428612	0.0145471	0.29024	0.629635	0.551969	0.643272	0.69137	2.00089	3.01028	2.4883	2.78551	2.82621
ENSOART00000000695.1	1.57299	0.44793	0.138097	0.387542	0.535776	0.85164	1.14081	0.471075	1.00753	0.917724	0.0866918	0.115335	0.0930137	0.206054	0.112881	0.312961	0.79342	0.508319	0.602483	1.33013
ENSOART00000000698.1	6.37837	3.46933	2.02851	3.27124	3.57598	7.64583	6.89389	3.71267	5.29886	4.97802	0.990595	0.958631	0.868144	1.53452	1.32625	3.05874	6.1374	2.81655	4.59792	6.98783
ENSOART00000000680.1	0	0	0	0	0	0	0	0	0	0	0	0	0	0.0475428	0	0.0172065	0.014583	0	0.024633	0
ENSOART00000000674.1	0	0	0	0	0	0	0	0	0	0	0	0	0	0	0	0	0	0	0	0
ENSOART00000000675.1	9.1427	9.43501	7.44782	9.68983	11.5938	6.41023	6.07204	4.63058	7.23484	5.68477	6.50723	6.87041	8.51542	5.70263	7.98452	5.9169	6.03295	6.52087	6.41665	8.59788
ENSOART00000000683.1	0.174804	0.10827	0.0912738	0.133902	0.144913	0.164501	0.291242	0.197821	0.191242	0.14773	0.533179	0.462699	0.285704	0.427087	0.413458	0.621766	0.728824	0.706931	0.688469	0.757834
ENSOART00000000681.1	0	0	0.0203613	0	0	0	0	0	0	0	0.0321818	0.253906	0.220851	0.0177052	0.149078	0.0925654	0.0982298	0.307191	0.395688	0.0412654
ENSOART00000000684.1	0.0641189	0.09431	0.0227032	0.011272	0.0365636	0.166621	0.232814	0.261111	0.218439	0.257894	0.0806652	0.0817646	0.0576793	0.0196613	0.103268	0.0385815	0.0988138	0.110354	0.164736	0.115127
ENSOART00000000677.1	5.62986	4.47025	2.00628	3.1296	2.71936	6.51261	7.68194	6.94678	7.41339	6.82767	3.03802	3.47424	3.65776	2.97975	3.15163	2.86171	4.87107	4.12182	4.96759	6.30881
ENSOART00000000678.1	0	0	0	0	0	0	0	0	0	0.0165723	0	0	0	0	0	0	0	0	0	0
ENSOART00000000693.1	41.1006	31.0553	17.5605	27.5479	29.4775	37.9143	44.9536	41.036	42.6726	38.6026	19.4316	16.1823	17.2509	18.4411	16.3295	19.2701	25.7551	19.4732	23.6187	29.3657
ENSOART00000000688.1	18.8245	14.598	12.9364	16.9516	20.2957	21.9162	28.3717	18.8757	29.3115	26.8455	15.1654	14.1432	15.9288	18.6519	18.7392	30.1565	32.8095	33.1068	30.0621	36.405
ENSOART00000000682.1	31.0769	36.1752	22.1968	29.6495	32.8324	17.8723	22.946	15.5149	21.5593	21.5334	31.9641	27.4914	31.174	23.6339	31.3659	4.37765	5.31422	8.17289	6.70947	5.48
ENSOART00000000679.1	0.0649393	0.0212151	0.0228651	0.113934	0.0551792	0	0	0	0	0.0226363	0.722964	0.435476	0.905646	0.457815	0.796532	0.546211	0.524626	0.507894	0.370735	0.509617
ENSOART00000000687.1	0.0158193	0	0	0.0166705	0	0	0	0.0203103	0	0	0	0	0	0	0	0	0	0	0	0
ENSOART00000000685.1	187.228	29.8093	8.59568	20.816	17.7442	66.4547	20.2344	69.3299	25.3324	41.1419	177.196	214.292	217.692	366.05	451.304	21.352	28.3991	11.2314	23.2474	17.8757
ENSOART00000000691.1	12.6281	12.2652	8.38688	9.25601	9.98282	11.3447	15.0029	11.9804	11.9972	11.7795	7.28036	6.50598	5.34373	6.77882	6.8086	9.60279	13.9001	9.12028	14.4476	15.2516
ENSOART00000000686.1	0	0	0	0	0	0	0	0	0	0	0	0	0	0	0	0	0	0	0	0
ENSOART00000000696.1	31.8	13.9176	6.66814	9.96355	13.8892	20.0644	18.3993	11.9427	18.4946	20.4863	3.27612	1.88736	2.75455	5.71698	3.9782	10.6685	14.9507	8.12511	16.4028	19.5865
ENSOART00000000690.1	6.61431	0.921937	0.990874	1.28045	1.68697	1.02363	2.06705	2.33627	2.1932	1.64657	0.783742	1.26524	1.36344	0.941392	1.60978	0.664515	1.02384	1.24655	1.3508	0.944237
ENSOART00000000689.1	0.869399	1.55384	1.17608	1.58495	1.64578	0.840243	0.979529	0.78195	0.932089	0.647731	2.2501	2.49409	2.8853	2.57347	2.19048	1.40574	1.97051	2.19661	1.41549	2.53454
ENSOART00000000697.1	41.7337	27.2239	12.7059	20.4936	20.037	32.0797	29.8299	15.9815	23.0944	28.119	4.57192	3.88846	4.31567	8.34649	6.96874	16.1701	32.6108	9.94308	34.6299	53.3255
ENSOART00000000692.1	18.7094	13.1435	11.5486	13.4424	13.0663	14.8585	16.1341	15.1395	15.2107	18.0374	6.54708	5.79567	5.54583	5.26548	6.59552	8.10386	11.4846	8.02623	11.3878	16.0798
ENSOART00000000694.1	0	0	0	0	0	0	0	0	0	0	0	0	0	0	0	0	0	0	0	0
ENSOART00000000699.1	0.100442	0.0844059	0.167346	0.166373	0.134709	0.0838752	0.0624746	0.110585	0.131816	0.150385	0.216296	0.259262	0.174266	0.0395938	0.152631	0.034518	0.0549039	0.0942838	0.0368643	0.0925411
ENSOART00000000701.1	19.7556	16.8769	8.54039	13.0945	13.898	12.6816	18.4871	13.5601	14.6294	13.6601	12.3695	8.94655	8.10297	10.7301	12.1231	5.01764	5.76308	12.5415	5.15947	7.86181
ENSOART00000000700.1	0	0	0	0	0	0	0	0	0	0	0	0	0	0	0	0	0	0	0	0
ENSOART00000000715.1	0.711468	0.89606	0.804799	0.806215	0.84724	1.06575	1.46282	1.07976	1.25668	0.833762	4.63527	3.64406	5.15856	2.92831	4.39749	2.09189	3.17816	4.28199	3.61102	2.55453
ENSOART00000000704.1	41.1196	23.7149	18.5282	24.1441	22.293	37.9687	50.3667	33.478	41.7727	41.8936	26.4768	22.7019	25.0657	27.9794	25.4561	67.144	64.3617	69.8478	67.1021	59.1284
ENSOART00000000702.1	0.182852	0.0597396	0.0214752	0.0641771	0.0610617	0.197855	0.21205	0.364662	0.998957	0.809872	2.74242	2.88869	1.50311	4.92859	5.0587	0.981389	1.56336	3.24886	2.05914	2.50308
ENSOART00000000703.1	1.07132	1.15377	0.677907	0.988724	0.942695	0.773274	2.05747	0.957258	1.02263	0.760538	1.86419	2.15906	1.63204	1.61427	2.56258	1.58474	1.81419	1.92912	1.28674	2.09934
ENSOART00000000706.1	2.158	0.638629	0.221599	1.13857	0	0	0	0	0.438728	0	3.34608	2.72747	1.55419	3.46443	3.93102	0	0.363085	0	0	0
ENSOART00000000705.1	0	0	0	0	0	0	0	0	0	0	0	0	0	0	0	0	0.832257	0	1.34531	2.02167
ENSOART00000000707.1	0	0	0	0	0	0	0	0	0	0	0	0	0	0	0	0	0	0	0	0
ENSOART00000000708.1	569.547	529.774	421.536	410.925	403.252	480.625	406.919	471.567	410.389	479.45	183.905	153.119	138.94	172.223	141.636	291.539	313.019	264.947	331.526	338.54
ENSOART00000000709.1	0	0	0	0	0	0	0	0	0	0	0	0	0	0	0	0	0	0	0	0
ENSOART00000000713.1	0.0200009	0	0	0	0.0340236	0	0.0347944	0	0	0	0.050134	0.0138804	0.067482	0.128751	0.0580857	0.721152	0.746236	0.225266	1.33597	1.75685
ENSOART00000000710.1	61.2361	75.2524	78.4481	82.7941	75.1685	15.1639	4.96404	6.90776	9.25679	10.6038	84.0392	61.4569	65.7683	59.5917	33.665	275.835	189.02	343.304	192.522	90.4533
ENSOART00000000716.1	0.0155101	0.00760542	0.0165002	0.0327372	0.0132906	0.022676	0.0423135	0.00998218	0.0317361	0.00814427	0.0259689	0.0809697	0.0418549	0.0499429	0.0224697	0.102702	0.0552607	0.173307	0.0193586	8.31762e-10
ENSOART00000000719.1	0	0	0	0	0	0.00769781	0.0326577	0	0	0	0.0266065	0	0	0	0	0	0.0721461	0.0311169	0.0817437	0.0340921
ENSOART00000000711.1	76.7154	61.456	42.6048	45.3092	44.5235	42.1822	69.2028	67.9584	60.1453	55.8542	43.9807	34.3311	33.1853	36.0304	33.3764	53.3529	47.9129	50.5749	52.1148	45.1576
ENSOART00000000717.1	80.3183	74.8231	46.5676	51.6258	68.4328	109.249	120.578	82.3213	101.63	97.1206	30.6058	25.5569	25.1546	28.3401	30.4918	49.1942	60.1416	49.6557	57.0526	74.0918
ENSOART00000000712.1	59.902	47.6745	34.687	40.8522	37.125	53.0132	48.0923	40.4783	49.5198	50.6832	32.0976	21.3512	22.0156	24.235	28.9875	48.02	46.9966	45.9455	46.8071	54.8612
ENSOART00000000718.1	31.9586	26.6691	26.7547	28.9832	38.2228	27.5344	31.4833	34.4195	44.2476	43.2133	38.0177	31.8657	37.8964	43.0348	41.5354	58.8969	50.1533	52.0843	51.056	47.5782
ENSOART00000000714.1	10.967	6.89443	4.69807	4.73563	5.53193	7.51307	12.4772	15.0905	15.1663	12.7429	8.77106	8.36453	8.64841	9.45312	7.72683	5.45034	5.02353	5.57816	4.91526	5.22389
ENSOART00000000731.1	14.5546	15.7311	14.2732	15.5603	15.2168	12.0726	12.9194	18.96	18.582	14.9704	16.9431	15.8435	14.4992	18.2014	16.9461	58.255	48.6021	79.2013	44.6851	43.5531
ENSOART00000000720.1	1.96483	0.56745	0	0.847457	0.0947726	0.90473	0.599791	0.291134	0.347627	0.239979	0.376664	0.399276	0.159673	1.0812	0.229394	6.82563	5.44646	1.5355	6.4522	8.37749
ENSOART00000000721.1	0	0	0	0	0	0	0	0	0	0	0	0	0	0	0	0	0	0	0	0
ENSOART00000000722.1	0.254685	0.259931	0.289546	0.205472	0.210444	0.205033	0.368512	0.283206	0.332887	0.186539	0.497647	0.571767	0.495931	0.382556	0.384341	0.529466	0.733356	0.67869	0.525586	0.640028
ENSOART00000000723.1	0	0	0	0	0	0	0	0	0	0	0	0	0	0	0	0	0	0	0	0
ENSOART00000000724.1	2935.15	1354.37	855.209	1621.13	1617.26	5329.16	1998.2	5228.76	2952.47	3648.72	3560.8	2953.29	2536.1	5072.63	4284.23	128.156	48.9482	73.2124	72.0746	75.3219
ENSOART00000000734.1	11.3661	14.1105	5.63558	9.13937	10.8337	3.9868	4.89725	3.00408	4.67249	4.229	7.93618	3.06553	1.96104	4.14483	6.95053	0.788697	1.01627	1.76345	0.653666	1.69197
ENSOART00000000726.1	4.08912	3.00206	3.03931	3.73961	4.58041	3.91517	4.34609	4.3765	6.60015	6.92357	2.19765	1.87293	2.01947	2.96058	2.69381	6.69462	7.585	4.93243	7.46552	6.49681
ENSOART00000000725.1	0	0	0	0	0	0	0	0	0	0	0	0	0	0	0	0	0	0	0	0
ENSOART00000000728.1	0.405601	0.372021	0.291504	0.413841	0.234681	0.331447	0.535627	0.521199	0.788299	0.37039	0.449474	0.336529	0.264833	0.493436	0.430076	21.6272	23.7549	35.3971	22.7348	20.8025
ENSOART00000000727.1	0	0	0	0	0	0	0	0	0	0	0	0	0	0	0	0	0	0	0	0
ENSOART00000000738.1	13.7465	6.40649	4.57845	6.27637	7.66396	9.85917	8.30951	7.13904	8.83107	8.45917	7.10007	6.85646	7.74905	7.88304	8.46176	9.83304	11.147	15.7427	8.69745	14.7903
ENSOART00000000729.1	0.410023	0.495095	0.340571	0.680532	0.679992	0.325104	1.32274	0.9031	1.10694	0.646535	1.32106	1.32883	1.30333	0.92414	1.43996	1.14945	1.1901	1.51667	0.892362	0.944635
ENSOART00000000730.1	0	0	0	0	0	0	0	0	0	0	0	0	0	0	0	0	0	0	0	0
ENSOART00000000732.1	79.0354	78.5938	42.3493	55.894	53.4792	65.2422	60.9415	68.0358	67.6913	67.3208	36.9215	28.6867	28.9928	34.0495	29.7464	69.6528	78.48	74.2781	77.0316	85.835
ENSOART00000000733.1	0	0	0.0176924	0	0	0	0.00725183	0	0	0	1.50097	2.1111	1.70034	1.331	1.77567	1.07183	1.86105	2.02896	1.65378	2.22389
ENSOART00000000735.1	0.0176838	0	0	0	0	0.0344695	0	0.0341317	0	0.00928259	1.64049	1.81091	1.71795	1.74941	2.16085	1.73444	1.93749	1.98539	1.56629	2.38579
ENSOART00000000737.1	8.59298	6.49156	6.27583	7.39391	8.276	10.916	11.6733	9.53945	11.8851	10.5893	5.58293	4.97903	5.48073	5.48992	5.0756	7.95188	8.5701	7.85918	9.06427	8.83131
ENSOART00000000736.1	1.56111	2.64625	1.48846	2.41685	1.50943	2.2075	2.64081	2.29716	2.06235	1.63266	1.82876	1.40785	0.860674	0.999086	1.94408	1.28056	2.12854	2.62824	1.56431	2.3935
ENSOART00000000742.1	0	0	0	0.0253874	0.0409414	0.751699	0.356482	0.123583	0.122721	0.12606	4.18612	5.00155	3.09364	7.67591	5.70353	34.9516	46.3363	31.1116	32.8307	53.8818
ENSOART00000000739.1	0	0	0	0	0	0	0	0	0	0	0	0	0	0	0	0	0	0	0	1.59509
ENSOART00000000740.1	1.59492	0	0	0	0	0	0.945184	0.726595	0.519251	0	0.561124	1.10984	0.979998	0.870372	1.38018	2.19524	1.73417	1.5229	1.46849	1.95827
ENSOART00000000746.1	0.0407409	0.0399314	0	0	0.0173222	0.0991881	0.106304	0.0522312	0.186742	0.0213103	0.170175	0.0565425	0.0137458	0.0374651	0.138047	0.220331	0.0844474	0.172069	0.0174442	0.218159
ENSOART00000000743.1	488.888	412.079	312.645	383.15	372.722	414.78	391.411	552.061	483.405	464.348	254.022	253.364	286.82	335.241	315.344	158.806	197.069	164.524	171.809	149.883
ENSOART00000000747.1	0.485356	0.649866	0.535765	0.965064	0.551339	0	0.0162719	0.0720497	0.0668076	0.03919	5.36533	3.46151	7.80844	5.82177	4.48162	0.0112347	0.00595202	0	0.0159872	0
ENSOART00000000741.1	0	0	0	0	0	0	0	0	0	0	0	0	0	0	0	0	0	0	0	0
ENSOART00000000748.1	25.9451	21.2073	18.493	19.2315	22.8976	25.3403	31.9479	27.9112	31.4013	29.6015	16.4643	14.5497	15.9992	16.0731	16.8311	37.121	44.1594	35.0055	39.2851	44.1403
ENSOART00000000744.1	57.3978	34.2472	23.9267	29.683	36.1058	50.3465	46.004	33.2742	50.4155	49.1083	20.8383	15.5663	20.1341	19.7947	22.0004	39.007	39.4883	37.5784	36.1398	41.6645
ENSOART00000000745.1	0	0	0	0	0	0	0	0	0	0	0	0	0	0	0	0.587704	0	0.472702	0	0
ENSOART00000000749.1	1.17172	1.22122	0.854119	1.18394	1.1821	1.08509	1.47572	0.953105	1.17315	0.829699	2.37779	2.55963	2.21268	1.79638	2.56883	2.04966	2.25104	2.54486	1.54777	3.14593
ENSOART00000000754.1	14.0268	9.34897	4.93966	7.49822	7.324	7.67049	8.89713	7.17731	9.07229	7.75198	5.72547	5.40708	5.12256	5.70269	5.70349	7.17897	8.88832	13.4605	9.58866	12.6496
ENSOART00000000751.1	0.115786	0.0756949	0.0512741	0.0610765	0.0412928	0.0940331	0.117741	0	0.0591901	0.0202545	0.242879	0.396073	0.162743	0.159776	0.186446	0.30195	0.701437	0.0362333	1.24777	0.852916
ENSOART00000000759.1	0	0	0	0	0	0	0	0	0	0	0	0	0	0	0	0	0	0	0	0
ENSOART00000000753.1	30.2769	28.5166	22.9562	24.6457	25.6266	26.2568	31.6153	34.5408	32.1713	26.7457	16.5417	16.3713	15.822	13.2741	16.6774	20.0723	22.338	26.2881	19.3884	24.17
ENSOART00000000750.1	0	0	0	0	0	0	0	0	0	0	0	0	0	0	0	0	0	0	0	0
ENSOART00000000752.1	6.50273	8.74868	9.31065	10.9355	14.2382	9.34841	14.896	14.2576	14.0412	7.13518	22.9	20.3354	19.3041	15.8865	14.9678	23.0727	22.5669	23.2399	23.4946	28.2039
ENSOART00000000757.1	0	0.0411125	0	0.0218105	0	0	0	0	0.0105672	0	0.0588776	0.121473	0.0806875	0.0770553	0.159887	0.335471	0.341504	0.666097	0.336143	0.688158
ENSOART00000000758.1	1.70487	2.56234	2.80396	2.5162	2.63271	2.61229	3.62094	4.75468	4.09782	2.45779	2.17435	2.48689	1.75327	1.5873	1.68336	1.37956	1.92418	1.89277	1.49445	1.38531
ENSOART00000000755.1	57.8507	41.0134	34.9505	36.7445	44.4948	62.6151	58.1194	53.968	70.0001	79.7207	19.6828	14.6267	16.878	21.1221	23.1974	33.3763	33.9741	31.9011	27.6421	31.7543
ENSOART00000000756.1	8.75952	17.0855	18.9044	14.7992	15.7871	4.97235	2.28746	8.34291	5.10089	4.00567	6.31898	7.8607	6.58105	5.75399	6.13246	6.98426	21.0124	3.85811	14.7442	13.0872
ENSOART00000000767.1	0	0	0	0	0	0	0	0	0	0	0	0	0.0120028	0	0.051638	0	0.0113446	0.100178	0.0304664	0.190804
ENSOART00000000760.1	0.524096	0.606411	0.672365	0.467533	0.800424	0.721482	0.533715	0.567898	1.18927	0.566399	0.568342	0.37688	0.634599	0.509585	0.446457	1.11105	1.37568	0.799014	1.57474	0.762976
ENSOART00000000761.1	1.19341	0	0	0.157863	0.122409	0.147507	0	0.378566	0	0	0.245143	0	0.105808	0	0.451563	0.913326	0.644709	0	0.398748	0.623839
ENSOART00000000762.1	0	0	0	0	0	0	0	0.0401018	0	0	0	0	0	0	0	0	0.0100113	0.0294527	0	0
ENSOART00000000801.1	6.5468	4.87314	2.29214	4.08944	4.16983	8.00423	5.79022	5.81402	6.20177	6.2383	2.9028	1.785	1.43596	2.50582	3.03435	2.34843	3.88511	4.60179	2.88774	5.40664
ENSOART00000000763.1	0	0	0	0	0	0	0	0	0	0	0	0	0	0	0	0	0	0	0	0
ENSOART00000000765.1	0.392951	0	0	0	0.106821	0.385427	0	0	0	0	4.26451	5.25345	3.7414	3.29997	4.05231	12.0401	15.1159	13.9639	18.6001	11.6635
ENSOART00000000764.1	0.0308568	0.0912595	0	0	0	0.0679541	0.0981468	0	0.0659547	0	0.102042	0.146796	0.197215	0.179095	0.0859784	0	0.144065	0.0293759	0.379059	0.19504
ENSOART00000000766.1	0.38757	0.270583	0.0952026	0.187365	0.182493	0.0946434	0.293213	0.131102	0.140576	0.106367	0.661605	0.694717	0.197469	0.779495	0.682227	0.929979	1.07286	0.513366	1.43204	1.52851
ENSOART00000000768.1	161.061	112.312	59.3908	84.2049	69.7181	116.231	122.877	143.722	132.451	152.676	111.374	91.7284	81.5958	100.471	87.9521	121.964	138.655	135.584	144.022	163.841
ENSOART00000000772.1	26.2489	15.3046	9.87209	11.1417	10.6972	9.395	8.10982	8.99213	8.16768	9.63234	7.15576	6.29521	5.26155	6.07609	6.31172	7.30687	8.6479	11.9525	9.12427	11.2471
ENSOART00000000769.1	0	0	0	0	0	0	0	0	0	0	0	0	0	0	0	0	0	0	0	0
ENSOART00000000770.1	0	0	0	0	0	0	0	0	0	0	0.0336243	0.0279289	0.0543141	0.0740191	0.0779206	0.217658	0.205341	0.321067	0.25848	0.17243
ENSOART00000000771.1	0.0203705	0	0.0430626	0.0439592	0.0346444	0.218214	0.120961	0.104462	0.0942841	0.106552	0.24259	0.262199	0.0760457	0.15543	0.189192	0.899335	0.486442	0.761962	0.952468	0.305421
ENSOART00000000797.1	25.2936	23.3507	16.7933	17.1769	16.5985	29.543	22.7056	28.6391	26.8462	23.4001	15.2548	14.181	12.0781	14.8051	14.7652	33.7992	30.3611	47.9071	33.2802	32.013
ENSOART00000000773.1	0	0	0	0	0	0	0	0	0	0	0	0	0	0	0	0	0	0	0	0
ENSOART00000000774.1	0	0	0	0	0.058271	0.273925	0.0606749	0	0	0	0.865699	1.06344	0.143202	1.55288	2.06195	1.26215	1.47281	0	3.47519	2.78623
ENSOART00000000779.1	3.57537	3.27246	1.73809	1.92848	2.41205	3.63924	4.08692	2.91042	3.49535	3.94789	1.42859	1.08576	1.29804	0.855927	0.945438	1.59248	2.50649	2.79892	2.3469	2.56757
ENSOART00000000781.1	6.4096	4.5665	1.56281	3.28429	3.67286	7.78604	6.92917	4.88923	7.38854	7.07849	4.59052	4.73392	4.28763	3.31914	5.72433	5.05472	10.7223	12.5721	8.74926	16.5668
ENSOART00000000780.1	0	0	0	0	0	0.670409	0	0.761297	0	0.621314	0	0	0	0	1.06462	0	0.226896	0	0	1.08222
ENSOART00000000782.1	17.893	12.6782	8.33068	10.1997	8.59624	9.23366	10.3246	13.4374	12.4824	11.5435	11.3978	8.03433	9.97686	10.2969	10.4324	12.3726	11.0102	17.5578	14.6676	11.1815
ENSOART00000000775.1	3.18468	1.57805	6.71099	1.71541	6.25756	3.19482	0.939851	0.672288	9.6049	0.57545	6.04096	1.95349	3.5848	5.17559	5.08336	6759.32	3237.16	7238.03	2710.83	2588.56
ENSOART00000000777.1	13.1035	13.4599	7.57107	6.63494	7.9862	11.8739	11.1507	15.3172	10.2156	8.16917	7.55598	8.01715	6.00344	7.97679	7.56996	12.6715	16.8786	15.1742	17.3473	19.311
ENSOART00000000789.1	0.292769	0.659053	1.01817	1.36766	0.69118	0.0506269	0.151452	0.0853486	0.0828721	0.0632858	6.8466	2.10223	3.22284	4.56231	3.3785	0.821081	1.0686	1.41738	1.27197	1.28666
ENSOART00000000776.1	0.233261	0.0482026	0	0.071551	0	0.0211514	0.0601244	0.0430185	0	0	0.066517	0.104606	0.179786	0.138393	0.0675258	0.068248	0.161329	0.260723	0.196984	0.497017
ENSOART00000000778.1	0	0	0	0	0	0	0	0	0	0	0.0490672	0.0188548	0	0	0	0.0263096	0.0538133	0	0.0187318	0.236836
ENSOART00000000785.1	28.5112	24.1154	40.9511	47.5124	61.5024	38.3264	67.9072	59.104	77.9727	54.9429	31.0356	33.7564	31.0266	30.0796	32.8065	76.718	131.498	76.7588	145.182	175.571
ENSOART00000000784.1	0	0	0	0	0	0.0058843	0	0	0	0	0	0	0	0	0.0116564	0.00726925	0.0250198	0	0.00516983	0
ENSOART00000000783.1	0	0	0	0	0.0204497	0.117331	0.0209478	0	0.0245188	0	18.9991	22.5255	11.158	43.2595	26.8066	27.2722	34.643	27.6411	20.3301	34.9228
ENSOART00000000787.1	126.667	83.1056	77.0518	88.4517	88.0226	126.717	137.843	93.8312	113.28	115.37	80.5935	81.1608	83.8148	89.9424	87.2307	124.268	160.033	143.028	151.133	186.466
ENSOART00000000792.1	13.9226	3.71022	4.5394	6.35499	8.45355	11.5524	12.3577	6.80208	14.1322	13.6308	4.52702	3.40815	4.76684	6.58288	5.00535	21.0833	36.5513	7.98481	43.9681	46.0416
ENSOART00000000793.1	9.89712	7.96504	6.19787	6.62664	7.41779	15.8939	20.3193	14.2429	17.0446	12.4552	4.23927	4.55051	3.22005	3.31045	4.75263	4.81599	5.40101	7.95642	5.38254	5.97575
ENSOART00000000786.1	0	0	0	0	0	0.0460453	0	0	0	0	2.50542	5.71342	3.64646	2.17503	4.23816	1.6439	1.84328	2.4431	2.95908	2.09533
ENSOART00000000788.1	12.9919	21.1093	4.70557	2.81208	3.61176	4.91337	6.56509	4.41321	3.79184	4.63908	4.78487	6.10504	9.36187	11.0964	5.82187	5.45607	6.83709	3.18841	4.93603	7.01352
ENSOART00000000790.1	0.117991	0	0	0.0177593	0	0	0.0293414	0.0649016	0	0.0176525	0.0141015	0	0.0113735	0	0.0163076	0.0405347	0.0376244	0.0632859	0.0721741	0
ENSOART00000000791.1	27.1058	46.2655	16.1102	13.5189	16.589	94.5757	60.3509	32.8175	18.8274	20.2219	79.5644	183.323	140.818	78.2742	118.107	156.498	199.709	193.474	207.134	153.014
ENSOART00000000795.1	1.04015	0.334583	0.206577	0.274007	0.166259	1.32986	1.20251	1.27267	1.29311	0.885233	5.86163	3.31905	4.06846	4.97762	2.81424	7.97373	5.4364	10.4957	6.2214	5.6885
ENSOART00000000794.1	0.424306	0.089345	0.0939827	0	0.0749275	21.8812	18.9775	18.8514	27.1392	23.4507	3.22232	7.2148	3.6203	10.2952	3.50512	15.8941	15.7047	10.592	12.6076	18.7028
ENSOART00000000802.1	27.8655	20.1186	9.78613	14.1092	16.5847	28.718	18.445	24.947	21.5374	18.3773	12.0471	8.14428	10.6573	15.6677	9.20351	5.64675	6.41568	6.52341	5.1451	6.82442
ENSOART00000000811.1	3.27519	3.09315	2.86976	3.14404	3.54963	3.48083	4.72931	3.07744	3.42622	2.78401	4.01734	3.86749	3.47396	3.06006	4.26924	4.35939	6.19514	7.03507	5.54293	7.64394
ENSOART00000000796.1	1.17186	1.15524	0	0.497025	0.190744	0.461718	0.818847	0.589448	0	0	0.382361	0.988169	0.509762	1.99978	0.952044	2.30843	1.90142	1.14607	1.90816	0.488724
ENSOART00000000800.1	92.7296	22.2034	21.68	42.4859	58.4678	107.297	112.443	227.349	201.985	146.023	11.3531	4.10689	7.27921	12.0391	2.70478	34.6561	10.7937	28.4982	23.2819	11.2233
ENSOART00000000799.1	0	0.0931229	0	0	0.077998	0	0	0	0	0	0.46509	4.96926	5.79167	0	0.186942	0	0.0612954	0.448952	0.0822365	0
ENSOART00000000798.1	0.882423	0.76149	0.589587	0.693758	0.824538	0.89693	1.08047	0.787067	0.886204	0.694866	1.45834	1.41362	1.04796	1.15203	1.43471	2.28447	1.99322	2.17679	1.73233	2.4194
ENSOART00000000805.1	18.8981	12.7296	10.0781	11.3574	14.38	14.8452	17.7029	14.9283	17.7859	17.3734	7.97421	6.30736	5.58384	6.90152	6.33176	11.9765	14.4398	11.0869	15.6285	17.8122
ENSOART00000000803.1	5.44825	3.83367	0.577243	0.170789	0.197782	148.728	136.462	114.197	149.541	152.061	16.0989	36.6974	19.9948	61.1413	19.7103	77.0551	73.6295	69.8449	73.5545	92.6898
ENSOART00000000804.1	0	0	0	0	0	0	0	0	0	0	0	0	0	0	0	0	0	0	0	0
ENSOART00000000807.1	62.6605	49.5715	33.4582	38.574	39.7189	61.683	58.1673	64.7242	61.7007	65.524	25.7644	21.9639	17.6	19.8687	23.6392	35.5008	41.8372	31.6538	34.1712	44.4327
ENSOART00000000808.1	35.5886	28.2297	19.6617	28.1912	26.8818	43.3584	43.3014	46.2365	45.3797	47.3747	17.3442	12.651	14.5804	13.0699	13.5149	27.1743	27.773	27.9397	26.087	31.3385
ENSOART00000000806.1	0	0	0	0	0	0	0	0	0	0	1.64853	0.957413	2.25197	4.42378	2.63531	6.44751	12.9655	2.49633	3.7854	24.3708
ENSOART00000000809.1	4.74176	5.06633	3.85046	4.49858	4.07284	4.36419	4.49029	3.40894	5.32874	5.32673	2.47456	2.66174	2.27915	2.42829	3.26547	1.12895	2.18613	2.58384	1.70362	2.45034
ENSOART00000000813.1	13.0525	15.2937	8.95381	11.0641	11.3593	13.1834	17.2228	12.0735	14.2007	14.3092	6.94131	6.22595	4.92643	5.76534	6.94644	8.97086	11.9706	10.7848	10.3037	17.0732
ENSOART00000000814.1	59.1761	59.6957	56.1193	51.5738	54.0629	59.3729	68.0763	63.3216	60.0236	61.4347	76.0861	71.3107	60.037	72.7713	74.3236	97.2303	115.678	97.6139	129.079	120.636
ENSOART00000000810.1	0.052376	0.0567524	0.0457918	0.0705105	0.0828751	0.107327	0.130718	0.110825	0.0935532	0.090419	0.184585	0.167494	0.121335	0.132969	0.142022	0.233175	0.347794	0.425601	0.261555	0.639287
ENSOART00000000812.1	0.0340531	0.025055	0.00909257	0.0528367	0.0122606	0.0803868	0.0198621	0.0290206	0.00793272	0.0156168	0.190702	0.329501	0.270943	0.216354	0.909438	0.261033	0.46252	0.389292	0.339911	0.89256
ENSOART00000000816.1	15.3841	12.7785	9.71409	10.8188	11.9195	12.3059	16.4688	11.4679	12.4929	13.1562	9.79604	8.67217	7.59701	8.80593	8.66768	20.2392	25.8876	18.6567	24.7204	30.7014
ENSOART00000000815.1	0.0106516	0.0187233	0.0375909	0.0936875	0.0374621	0.976865	0.302442	0.161884	0.0865061	0.182103	5.15247	6.81124	5.21864	7.4823	9.23123	16.4241	20.3421	20.3435	17.4392	27.2888
ENSOART00000000817.1	2.28326	0.389008	0.0695087	0.173809	0.055854	2.02864	2.75628	2.32414	2.24808	2.65548	0.990168	1.51085	2.25602	1.18635	2.28003	1.07183	1.81551	1.58361	1.47356	2.03965
ENSOART00000000818.1	0.865549	1.34656	0	0	0.300412	0.442061	0.378266	0.992024	0	0.822332	0.373383	0	0.581346	0.412123	0	0	0.397037	0	0	0.878482
ENSOART00000000819.1	0.110308	0.216091	0.192732	0.0385838	0.371481	0.0357717	0.0956399	0.0937818	0.0744629	0	0.152586	0.228723	0.223396	0.135187	0.142816	0	0.117281	0	0.125949	0
ENSOART00000000822.1	9.53203	11.4461	7.8899	9.83001	9.99782	13.9291	14.8778	15.1341	14.1621	14.7362	11.1554	9.47508	8.37166	8.98204	8.88751	16.1461	20.4973	19.203	21.7383	27.498
ENSOART00000000820.1	1.2079	0.964227	0.186511	1.22637	0.391944	3.97396	4.18456	4.85526	4.11021	4.21606	0.419753	0.756955	0	0.293453	0.400734	1.06859	0.541657	0.0448629	0.624345	0.458874
ENSOART00000000836.1	30.9329	29.8234	20.9123	25.0085	24.9741	36.5895	40.3253	36.0227	41.4138	42.7676	17.4333	14.8032	15.0829	16.8787	16.8243	22.9088	29.1998	27.2556	29.5851	36.4789
ENSOART00000000838.1	0	0	0	0	0	0	0	0	0	0	0	0	0	0	0	0	0	0	0	0
ENSOART00000000827.1	101.099	74.0178	44.5324	56.3306	57.5464	150.403	252.225	461.431	362.024	351.013	44.784	35.8947	34.6234	42.1036	38.347	117.095	102.699	141.243	90.5029	84.8254
ENSOART00000000821.1	7.78358	5.99717	6.31327	7.23337	7.36123	7.45893	9.47189	6.54218	8.09321	6.80353	4.22293	4.13638	4.37777	3.80984	4.62389	5.19893	6.3498	6.95913	7.11606	8.22262
ENSOART00000000824.1	0	0	0.0125689	0.0374566	0	0.0461459	0	0	0.0483819	0	0.00992515	0.0164656	0	0.0217817	0.0228871	0.598322	0.275755	0.544602	1.03421	0.535675
ENSOART00000000825.1	0	0	0	0	0	0	0	0	0	0	0	0	0	0	0	0	0	0	0	0
ENSOART00000000833.1	3.9314	2.31731	1.51297	2.48093	2.36101	3.41131	1.39531	4.47296	4.19809	3.15135	9.87189	8.77898	11.0792	9.48825	10.7577	28.1598	21.4861	36.15	21.6861	17.4848
ENSOART00000000831.1	0	0	0	0	0	0	0	0	0	0	0	0.0100837	0	0.0400402	0	0.0349066	0.00462695	0	0	0.0935758
ENSOART00000000841.1	70.7629	55.7051	32.3762	40.3483	44.1551	64.9583	73.1837	65.3071	67.0302	65.5337	23.5691	20.3114	20.0775	22.9017	22.0211	27.2978	35.1968	27.6343	27.674	42.3228
ENSOART00000000823.1	84.3806	84.6954	78.4171	97.5711	88.1098	90.8677	127.691	113.018	129.487	130.084	34.3361	20.5771	37.8603	30.4594	28.2097	71.3651	66.9139	50.9055	70.2285	63.7624
ENSOART00000000834.1	0	0	0	0	0	0	0	0	0	0	0	0	0	0	0	0	0.0279656	0.0186633	0	0
ENSOART00000000837.1	0	0	0	0	0	0	0	0	0	0	0.00821551	0.0340344	0.00988868	0.0134873	0.0848976	0.0117699	0.0208577	0.0219403	0.041847	0.0739574
ENSOART00000000848.1	17.0263	10.2039	5.26418	7.30775	7.62064	8.55621	9.05434	13.7398	10.5667	9.55024	2.37812	1.60681	1.7071	1.82584	2.09164	1.27266	1.13062	2.80578	0.985539	1.75088
ENSOART00000000854.1	0	0	0	0	0	0	0	0	0	0	0	0	0	0	0	0	0	0	0	0
ENSOART00000000828.1	13.6637	10.9792	9.33115	12.3992	10.7026	14.9904	16.54	15.8005	13.625	12.599	14.1822	13.1121	11.3135	11.8074	11.9523	19.9278	23.062	25.9088	22.9144	17.3648
ENSOART00000000830.1	0	0	0	0	0	0	0	0	0	0	0	0	0	0	0	0	0	0	0	0
ENSOART00000000835.1	29.0902	21.066	27.6964	26.8146	36.1911	13.873	20.2713	12.9707	25.0236	23.5002	11.3965	11.5944	13.6016	8.62313	13.2793	11.6179	12.5836	12.3613	14.1524	11.0054
ENSOART00000000829.1	0.0824337	0.026923	0.0289387	0.0288948	0.0465321	0	0.0238653	0	0.0279196	0	0.114445	0.0571043	0.0927211	0.101048	0.319652	0.0329901	0.0613431	0.0773551	0	0.0586016
ENSOART00000000832.1	0	0	0	0	0	0	0	0	0.156888	0	0	0	0	0.145408	0	0	0	0	0.148343	0
ENSOART00000000839.1	0.084233	0	0	0	0.0237653	0.273289	0.0487667	0	0	0	4.86363	3.44219	4.7373	2.81361	3.83834	8.22459	11.3635	3.68865	11.4204	14.9647
ENSOART00000000840.1	0	0	0	0	0	0	0	0	0	0	0	0	0	0	0	0	0	0	0	0
ENSOART00000000842.1	6.96266	2.22981	1.62667	1.99438	2.59275	1.55591	3.76512	2.91135	1.98225	1.89502	4.22079	6.38155	4.95489	7.32286	5.56749	7.31893	10.7743	7.1185	9.37246	11.7318
ENSOART00000000843.1	0	0	0	0	0	0.0585069	0	0	0	0.0623053	0.0495302	0.165537	0.040705	0.110543	0.0586611	1.0076	1.53806	2.76763	0.979738	2.14018
ENSOART00000000859.1	147.88	110.202	75.3071	84.7575	88.7745	133.275	171.883	132.904	147.631	156.825	47.1123	37.2265	37.3325	39.4722	40.6198	74.5647	92.5628	57.2436	90.6251	103.344
ENSOART00000000847.1	41.9786	44.1065	28.9965	33.4662	36.7942	37.0673	36.3239	36.5386	36.2384	34.8207	37.9531	26.5919	30.0097	35.3186	32.9515	47.4855	29.5898	39.8025	31.7829	38.8499
ENSOART00000000846.1	0.00720931	0	0	0	0.00617972	0	0	0	0	0	0.00605507	0	0.00486365	0.0198983	0.00696211	0.0347208	0.0275829	0.0203055	0.0123485	0.0155665
ENSOART00000000844.1	0	0	0	0	0	0	0	0	0	0	0	0	0	0	0	0	0	0	0	0
ENSOART00000000845.1	10.7183	10.7377	9.28751	8.5896	11.9191	5.20529	3.47776	6.88816	5.72647	5.21579	11.9398	7.50379	8.10449	9.56774	7.8185	6.40009	4.60739	7.93757	5.02559	5.49958
ENSOART00000000851.1	0	0.0214353	0	0	0.0185816	0	0.0190171	0.0280264	0.066799	0	0.0730409	0.0303432	0.0295181	0.060335	0.1059	0.551869	2.30863	0.0821069	1.89166	1.63813
ENSOART00000000852.1	22.5955	15.3064	15.6681	16.8353	20.6344	17.373	26.1175	22.4759	23.4993	22.0531	19.3718	18.1998	22.6404	21.4427	20.3429	26.5025	32.1229	27.4656	29.9846	30.0819
ENSOART00000000850.1	0	0	0	0	0	0.104883	0	0	0	0	0.444881	0.779937	0.437472	0.64404	0.367638	5.03469	2.73774	1.82193	2.67799	2.26517
ENSOART00000000849.1	8.57307	5.71099	2.48981	3.77689	3.61536	3.798	5.56295	6.81813	5.23331	4.2229	5.884	4.91352	4.40953	3.20324	5.05344	2.07895	1.92381	2.66947	2.63895	4.16617
ENSOART00000000855.1	2.69007	2.90762	1.52897	2.08236	2.40338	2.44165	2.90206	2.38811	2.37633	2.1808	3.62789	3.98932	2.99262	3.15958	3.74571	7.32873	9.08181	9.1674	5.90105	8.95589
ENSOART00000000853.1	490.847	737.594	543.298	534.339	853.556	294.311	504.38	563.919	695.747	669.294	242.967	223.92	262.391	278.122	249.286	530.179	337.785	511.47	426.759	310.491
ENSOART00000000856.1	35.2749	25.2486	14.4052	10.8342	10.6359	0	0	0	0	0	0.280577	0	16.8474	62.2862	0.346307	0	0	13.6069	29.7113	0
ENSOART00000000857.1	0.0363585	0	0	0	0	0.0177064	0.0474553	0.303194	0.185314	0.0190308	0.0608022	0.0252436	0.110401	0.284221	0.140739	0.0655638	0.0869555	0.136505	0.171248	0.116971
ENSOART00000000858.1	16.5508	7.73989	6.64589	9.20594	7.82394	17.408	12.6353	17.548	17.9682	18.3958	12.574	9.39493	8.69991	12.0043	11.2616	20.3211	13.1295	19.5844	14.4897	12.155
ENSOART00000000860.1	11.513	13.8702	12.7462	12.5709	14.9246	15.019	18.2729	13.753	19.108	16.9442	11.9716	15.2477	12.7963	13.5445	9.69009	19.5082	23.3112	18.9736	20.8726	18.3631
ENSOART00000000861.1	0	0	0	0	0	0	0	0	0	0	0	0	0	0	0	0	0	0	0	0
ENSOART00000000871.1	0.078418	0.0824068	0.0536891	0.0709639	0.100927	1.48519	0.66451	0.829709	0.802884	0.600405	0.513128	0.608539	0.699062	0.644205	1.13018	2.40818	2.90913	4.01788	2.97903	4.73359
ENSOART00000000866.1	8.46782	6.80924	5.73835	6.76851	7.41179	10.9749	15.563	13.4621	15.9802	15.4026	5.22495	5.22933	4.67693	6.60554	6.42237	12.3981	16.4263	14.0616	17.5617	18.3307
ENSOART00000000862.1	0.341411	0.102934	0.0276757	0.138114	0	0.613564	0.273781	0.436882	0.32035	0.466218	0.0437744	0.0363962	0.106341	0.120728	0.0763605	0.756866	1.6751	0.221806	1.84408	1.79362
ENSOART00000000863.1	0	0	0	0	0.0138549	0	0	0	0	0	0.0680003	0	0	0.0149478	0	0.0195435	0	0.0305106	0	0
ENSOART00000000865.1	0	0	0	0	0	0	0	0	0.0399287	0	0	0.0815991	0.0396665	0	0	0	0	0	0	0
ENSOART00000000864.1	36.5564	23.2807	29.8474	41.4636	70.9002	31.2014	24.7754	28.6122	44.2446	43.6395	16.7433	15.3655	20.5637	18.0047	30.1911	43.0156	25.9892	30.9777	29.6051	30.7264
ENSOART00000000867.1	3.67581	3.51405	3.86442	5.12145	6.64292	5.90264	6.18202	4.36242	7.8207	7.29513	3.11403	2.81576	3.64321	3.64481	3.76995	7.70581	8.01085	7.58894	7.35503	8.4392
ENSOART00000000892.1	2.06938	1.37219	1.08504	1.13743	1.2062	2.30978	1.27509	1.80591	1.52611	1.29442	5.56323	6.84434	5.44669	7.20629	6.47032	15.8766	17.7919	15.4867	14.4587	20.2071
ENSOART00000000869.1	4.10406	2.65664	1.74633	2.75342	3.38562	6.74441	5.75166	4.57823	7.26902	4.46867	3.18821	2.82051	3.2734	4.04654	3.6379	12.4797	10.4721	17.9263	7.19098	11.487
ENSOART00000000886.1	74.5094	74.2518	49.5551	56.8715	64.6444	61.6233	71.9351	54.048	70.5596	66.2013	23.4865	22.4585	21.5764	21.0477	22.0423	54.1863	111.025	27.8023	118.809	132.741
ENSOART00000000868.1	0	0	0.0147857	0	0	9.49628	11.822	7.51173	10.2521	5.08308	0.0467131	0.184117	0.117053	0.0769475	0.288337	7.14136	6.70175	24.0715	5.59165	10.8028
ENSOART00000000873.1	7.84221	7.33014	7.08406	7.1222	9.44141	8.24282	13.8649	17.1439	19.4761	13.1594	14.7146	16.5179	16.1379	26.3167	17.5445	26.1427	24.9861	37.3426	25.3803	24.6471
ENSOART00000000872.1	0	0	0	0	0	0	0.0475831	0	0	0	0	0	0	0	0	0	0	0.0516817	0.0471604	0
ENSOART00000000870.1	0	0	0	0	0	0	0	0	0	0	0	0	0	0	0	0	0	8.63917e-07	0	0
ENSOART00000000874.1	0	0	0	0	0	0.0385789	0	0	0	0	0.390655	1.45573	0.422898	0.685156	0.460211	3.46803	7.70862	5.42922	3.47737	4.05757
ENSOART00000000875.1	0.327233	0.306231	0.236491	0.235158	0.406101	0.666566	1.23035	0.706795	1.15366	0.436428	2.34131	3.19365	1.53551	1.7922	1.02134	2.45088	3.67101	2.3596	3.10807	2.17371
ENSOART00000000876.1	14.971	11.4256	8.51194	11.0099	10.7464	12.7887	15.5812	15.1531	15.0978	14.2059	6.753	6.10619	6.03389	7.6546	6.73965	11.0948	10.6104	12.3076	9.36459	12.1145
ENSOART00000000877.1	0.357546	0.353757	0.426106	0.502006	0.270343	7.47345	14.6759	11.099	31.5599	22.758	1.88877	2.80777	1.05103	1.5098	1.6873	81.1699	48.5858	60.8848	39.6308	46.1324
ENSOART00000000878.1	1.38827	0.151063	0.107059	0.323023	0.171767	0.45007	0.533591	0.195719	0.621675	0.160035	2.16539	1.63003	1.21646	1.13397	1.75253	1.2927	2.15029	1.93002	2.11336	2.16295
ENSOART00000000880.1	18.5166	11.7092	5.50508	8.78912	8.73286	11.4505	17.0675	8.44794	11.0586	15.1658	4.75318	3.93407	3.1061	4.77152	4.78083	5.25488	7.85974	7.22635	8.77935	11.6927
ENSOART00000000879.1	2156.8	2287.45	2219.04	2105.97	1875.4	2296.64	2001.87	2040.04	1891.24	2158.2	1074.38	1043.95	929.16	1174.08	896.748	1504.02	1675.21	1351.85	1564.96	1588.27
ENSOART00000000882.1	12.1254	15.1874	12.4798	14.1352	14.8986	19.2588	22.4821	21.0933	21.1367	19.2967	13.0497	10.2661	11.0962	10.3642	10.7908	12.0872	13.6147	12.6452	14.1791	15.8859
ENSOART00000000883.1	195.908	237.441	157.27	126.576	161.47	160.716	244.398	152.671	171.501	124.286	67.442	81.3791	64.8384	57.9282	62.6483	89.4442	147.728	111.73	124.133	154.328
ENSOART00000000881.1	0.779976	1.44651	0.920806	1.42088	1.50985	1.4241	1.42784	1.59995	3.33515	1.06676	1.31791	0.430003	1.14511	0.269094	0.99494	1.00923	1.03816	1.96495	1.1123	0.620795
ENSOART00000000887.1	19.8908	15.6465	11.152	12.2669	13.1217	16.2249	18.7344	17.7173	20.8987	18.9725	17.6587	15.8745	12.73	10.3205	14.7019	20.5592	20.38	21.593	18.1769	21.8546
ENSOART00000000885.1	2.87907	3.00637	2.67372	2.494	2.58712	2.86657	3.32318	3.29295	3.26242	2.43481	3.53519	3.673	2.93754	2.75494	2.88423	5.93653	6.44559	7.88351	5.28143	5.57763
ENSOART00000000884.1	0	0	0	0	0	0	0	0	0	0	0.762686	0.606659	0	0.136001	0.291247	2.0716	7.70077	2.54342	1.28619	4.51614
ENSOART00000000909.1	15.8104	15.1976	6.26834	8.69314	8.3395	13.3411	14.6781	10.0424	13.2944	13.8629	2.69779	2.80701	3.15206	3.18619	3.28562	4.03178	4.50494	5.27688	3.95511	5.80502
ENSOART00000000888.1	0.029186	0.0143069	0	0	0.0124528	0.0284337	0.0254139	0.0187431	0	0	0.0366591	0.0712706	0.0295387	0.067112	0.0423369	0.298386	0.119086	0.233123	1.02556	0.345683
ENSOART00000000890.1	0	0	0	0	0	0	0	0	0	0	0	0	0	0.023205	0.0121934	0	0	0	0	0.0271452
ENSOART00000000889.1	25.7141	31.6712	16.9098	20.4305	24.5254	23.2219	39.6907	26.0452	29.2112	30.7398	16.1564	11.1603	14.7609	21.7377	14.8291	33.9942	28.9218	34.2627	32.1861	30.6655
ENSOART00000000891.1	0.0323059	0	0	0	0.0272774	0	0	0	0	0	0.107443	0.223529	0.523359	0.296986	0.470201	0.15504	0.226705	0.363781	0.165994	0.137394
ENSOART00000000894.1	0.0125864	0.0123768	0	0.0132797	0	2.51396	10.6833	1.53705	3.09755	2.70813	0.0633594	0.0175329	0.0255385	0.0115987	0.0973645	0.423968	1.00282	0.0473475	0.872657	1.35287
ENSOART00000000893.1	849.691	296.261	114.454	256.997	146.779	1052.48	478.47	669.21	357.769	403.045	118.335	82.2908	109.896	100.898	93.0167	518.64	574.852	451.461	476.194	562.166
ENSOART00000000901.1	13.2543	11.5579	8.9778	9.11763	9.75242	15.2365	15.5549	15.6606	15.1066	14.7428	5.87322	5.2661	4.41538	5.12811	4.64218	10.0519	12.6719	11.1809	11.6057	13.6573
ENSOART00000000895.1	0.0779779	0.198758	0.0826229	0.131483	0.159603	0.136733	0.0678862	0.220268	0.238679	0.098034	0.404671	0.855947	0.852354	0.860643	1.10118	1.27536	1.59632	1.05401	1.73624	2.27812
ENSOART00000000896.1	283.567	204.853	145.06	192.489	197.66	231.008	237.352	244.304	294.688	281.974	136.624	116.451	130.893	148.845	150.786	263.75	317.713	240.208	310.904	331.602
ENSOART00000000898.1	1.538	3.53129	2.74562	3.14041	4.3494	1.91943	1.91153	1.68398	2.77992	2.16656	3.42864	3.03697	2.47276	3.72266	4.70564	0.398051	0.300178	0.897418	0.32622	0.38796
ENSOART00000000903.1	10.4598	8.17175	7.00408	8.32091	9.3313	10.9235	12.1165	11.7996	12.0276	11.9119	5.7507	5.58591	6.1415	4.83445	6.07577	6.59293	9.65977	8.22258	8.26415	10.8031
ENSOART00000000897.1	0	0	0	0	0	0	0	0	0	0	0	0	0	0	0	0	0	0	0	0
ENSOART00000000911.1	0.0256417	0.0182934	0	0.00492507	0.00200412	0.00681864	0.0101738	0.0120229	0.0071682	0.00490431	0.00980884	0.011373	0.00943489	0.00429005	0.0179925	0.014043	0.0156067	0.0240768	0.00798583	0.0353389
ENSOART00000000900.1	0	0	0	0	0	0	0.0531927	0	0	0	0	0	0	0	0	0	0	0	0	0.0652236
ENSOART00000000908.1	0	0	0	0	0	0	0	0	0	0	0	0.051247	0.0627134	0.0594927	0.0417659	0.290677	0.522837	0.660398	0.935326	1.83981
ENSOART00000000899.1	0	0	0	0	0	0.0876423	0	0	0	0	0.0733859	0	0	0.165949	0	0	0.144718	0.424347	0.310411	0
ENSOART00000000902.1	11.4283	11.7977	6.13283	6.55081	6.18326	11.6726	10.4632	11.461	13.6343	15.7274	16.5896	16.1003	11.4005	16.3504	15.5305	49.381	44.801	51.5444	47.7783	53.5015
ENSOART00000000905.1	0	0	0	0	0	0.0838879	0.0373416	0	0	0	0.214284	0.40018	0.238248	0.100622	0.466276	0.34249	0.634616	0.381626	0.662853	0.911069
ENSOART00000000907.1	0.0521118	0	0.054234	0.0545518	0.0434998	0	0	0	0	0.054055	0	0.235398	0.451579	0.357322	0.450725	0.397475	0.314007	0.565739	0.270116	0
ENSOART00000000910.1	0	0	0	0	0	0.00945845	0	0	0	0.0101865	1.88924	2.1	2.3769	1.4732	1.75352	1.36674	1.6401	2.03186	1.81199	1.46469
ENSOART00000000904.1	0	0	0	0	0	0	0	0	0	0	0	0	0	0	0	0	0	0	0	0
ENSOART00000000922.1	0.136546	0.0393854	0.0854366	0.0508578	0.0550525	0.328801	1.07149	0.258449	0.608037	0.227733	1.01158	1.55415	1.34929	0.67984	0.977497	0.995985	2.48411	0.769168	3.23308	3.17219
ENSOART00000000915.1	0.0434045	0	0	0.0152705	0.0496069	0.712167	0.0315419	0.0465659	0.037012	0.0075984	3.65765	4.13961	5.85156	4.23294	7.13976	7.70835	5.86767	10.568	6.77785	7.71616
ENSOART00000000906.1	121.58	93.8066	77.3322	90.7513	74.4658	96.161	94.4633	80.2965	91.7904	93.2641	85.4059	86.1941	72.3846	76.1965	80.6671	87.9643	115.181	107.761	126.157	129.48
ENSOART00000000917.1	0.501282	0.198318	0.163423	0.12721	0.172793	0.179079	0.345903	0.350514	0.334042	0.213866	0.615494	0.841542	0.828098	0.821785	0.829063	0.973219	2.16146	3.0222	1.46748	2.04766
ENSOART00000000912.1	0.685316	1.07907	1.40913	2.87117	1.67398	3.75905	0.357079	0.344925	0.688382	0.14236	108.212	119.958	126.844	118.398	116.073	230.899	232.353	189.89	179.354	195.497
ENSOART00000000916.1	0.425172	0.221458	0.2678	0.504285	0.714863	1.55344	1.68957	2.59499	2.86265	2.59095	0.489796	0.4895	0.923352	0.415528	1.04051	2.09387	1.62261	2.24503	2.61706	4.65888
ENSOART00000000914.1	0	0	0.565766	0.302028	0.448023	0	0	0.443164	0	0	0	28.3381	0.319239	27.2619	31.4128	2.60024	54.644	2.69521	44.6307	75.2991
ENSOART00000000913.1	0	0	0	0.098477	0	68.3134	0	0	0	0	97.9016	168.296	501.959	685.413	643.938	1919.98	3207.14	877.224	3505.56	1246.64
ENSOART00000000938.1	0.0233904	0	0	0	0.0133618	0	0.020395	0.0100358	0	0	1.3945	1.74207	1.65166	0.9612	1.51359	1.57698	1.4468	1.72752	1.43564	1.71656
ENSOART00000000920.1	22.6629	22.0837	20.4105	25.3406	43.3589	14.8881	22.3084	16.3416	30.0951	23.4722	28.266	23.3188	26.2105	31.4889	35.1553	44.2215	24.2818	52.5942	25.2572	23.4857
ENSOART00000000930.1	4.15402	5.18371	2.59175	3.84056	4.53211	5.56487	6.22151	5.71545	7.53395	6.82611	7.7365	8.35268	9.91338	11.0501	12.6922	17.6073	14.9527	33.9099	10.2901	18.4473
ENSOART00000000918.1	0.229763	0.236321	0.244521	0.230683	0.144049	0.339857	0.767893	0.59931	0.490229	0.485749	0.577238	0.825476	0.64042	0.460676	0.472763	1.31895	2.05787	2.6916	0.865613	1.86815
ENSOART00000000919.1	26.6377	15.9165	16.2936	20.8575	18.7444	31.2138	23.4514	19.3967	19.3832	16.2658	25.0917	16.1834	22.1934	19.9926	20.3523	28.3319	33.7716	36.619	34.1624	34.5502
ENSOART00000000921.1	0.0414706	0.020323	0	0.0218314	0.0176286	0.0201924	0.0180333	0	0.0211181	0	0.0173197	0.0143875	0.0279843	0	0.0602269	0	0.0132247	0.0583832	0.0177566	0.0444034
ENSOART00000000923.1	0	0	0	0	0	0	0.347611	0	0	0.0695186	0	0.138467	0.227633	0	0.196767	0.0803642	0.0644912	0	0	0.14018
ENSOART00000000924.1	124.709	91.9269	87.4556	90.5569	150.752	122.704	91.3682	100.441	137.429	141.468	41.2447	40.7262	33.4515	50.6282	46.2229	83.5791	75.9302	74.8008	63.2821	63.9083
ENSOART00000000927.1	30.8842	18.4595	10.4187	13.3224	12.6669	21.7999	23.5221	15.1815	19.6299	20.1746	3.69936	4.55145	4.76129	4.73202	5.73389	7.77743	9.28364	6.91736	9.33305	9.26039
ENSOART00000000925.1	0.0313893	0.0307498	0	0	0.0265154	0.0610907	0.0272413	0.0401018	0	0	0.104423	0.0296205	0	0.028854	0.0304491	0	0.0798913	0	0.0806344	0.13357
ENSOART00000000926.1	0	0	0	0	0	0	0	0	0	0	0	0.051832	0.0383168	0	0	0.0681556	0.0273403	0	0	0
ENSOART00000000932.1	0	0	0	0	0	0	0	0	0	0	0	0.0589181	0.0114485	0	0	0	0	0	0	0
ENSOART00000000933.1	12.1558	9.3234	6.03459	8.89898	11.9004	11.7837	11.4397	10.1017	13.017	11.5537	5.58192	4.94347	6.12373	5.84633	7.41359	8.90839	9.64763	13.8057	7.53275	11.2596
ENSOART00000000928.1	13.058	4.80344	3.05783	5.21674	7.27745	26.852	11.9521	28.0174	31.552	11.5733	28.4157	22.1749	33.9447	56.0308	32.4364	30.5038	17.3144	29.4575	19.8938	9.41208
ENSOART00000000931.1	0	0.0211361	0	0	0	0	0	0	0	0	0	0	0	0	0	0.0259134	0	0	0	0
ENSOART00000000929.1	0	0	0	0	0	0	0	0	0	0	0	0	0	0	0	0	0	0.0804098	0	0
ENSOART00000000936.1	0.52351	0.454011	0.451927	0.360719	0.330997	0.601655	0.740295	0.518176	0.665785	0.602287	0.85221	0.571839	0.479564	0.542517	0.734156	0.829566	0.964558	1.547	0.939183	1.08391
ENSOART00000000934.1	11.2094	13.9666	11.6972	12.3404	13.3967	10.6107	16.7165	17.986	19.1882	18.7719	12.6628	9.67369	8.75534	10.2419	9.72936	52.6868	39.7706	46.7443	43.9071	39.4898
ENSOART00000000937.1	89.1282	77.1086	71.8886	81.9905	91.694	248.899	187.327	247.068	208.459	202.754	129.698	95.8605	128.8	145.258	124.321	164.709	174.608	196.167	157.279	204.101
ENSOART00000000943.1	0.158937	0.095928	0.117156	0.0580794	0.0891386	0.148971	0.229272	0.173198	0.168956	0.0706533	1.51528	0.962016	0.927886	0.916764	1.98902	1.87713	2.22185	6.99626	2.08367	2.64163
ENSOART00000000939.1	0	0	0	0	0	0.0535813	0.0797786	0	0.0747671	0	0.205033	0.241398	0.310267	0.177523	0.328847	0	0.152782	0.219857	0.202274	0.299113
ENSOART00000000940.1	0	0.0186847	0	0	0	0	0	0.171141	0	0.139649	0.328655	0.384246	0.359197	0.341379	0.248511	0.3437	0.218058	0.290315	0.230486	0.220415
ENSOART00000000941.1	2.99666	0.752017	0.903734	1.1057	2.39085	0.333525	0.200282	0.355377	0.514204	0.470349	2.27135	1.64515	3.40191	1.78091	2.3052	6.62105	3.85617	6.27328	3.70124	3.78601
ENSOART00000000942.1	3.50601	2.94837	2.4698	3.12027	2.69442	0.421263	0.595903	1.75914	1.07437	0.723283	7.96056	5.66135	6.96335	4.65154	4.10588	12.4194	10.2666	13.7599	9.03465	8.74771
ENSOART00000000935.1	0.566318	0	0	0.605172	7.22948	0.748377	0.663558	0.712261	11.4925	2.43492	0.92795	0.405879	1.96779	5.06703	5.93548	15.6436	1.77166	3.25758	0.884054	1.20115
ENSOART00000000949.1	0.0312754	0	0.0497066	0	0	0.0457007	0.053633	0.0808228	0.180046	0.177773	0.101207	0.0771095	0	0.0862967	0.0837826	0.0526661	0.12069	0.519781	0.452194	0.362456
ENSOART00000000955.1	26.7837	20.048	9.44478	12.5356	13.2882	18.0604	17.1538	14.833	16.2653	16.9682	7.00729	6.08517	5.59701	7.56097	6.85708	7.99565	12.7395	12.2531	11.9892	18.604
ENSOART00000000944.1	0.566318	0	0	0.605172	7.22948	0.748377	0.663558	0.712261	11.4925	2.43492	0.92795	0.405879	1.96779	5.06703	5.93548	15.6436	1.77166	3.25758	0.884054	1.20115
ENSOART00000000945.1	0	0	0	0	0	0	0	0	0	0	0.741157	0.473073	0.392765	0.970617	0.565853	1.13816	0.910678	0.495707	1.4021	0.111017
ENSOART00000000956.1	16.5628	12.4983	7.85754	9.71981	9.56549	11.853	14.4758	8.73459	13.2096	12.1894	5.87006	5.30492	3.94302	5.16024	5.59984	4.86073	10.6003	5.86588	10.4389	13.5606
ENSOART00000000946.1	3.41656	2.63526	0.628778	1.53511	1.29483	4.89492	5.49033	3.07138	3.91443	4.68655	1.39164	0.843737	2.03024	3.06862	1.45612	8.24679	18.3633	4.63607	21.2081	21.2407
ENSOART00000000947.1	2.02414	0	0.296169	0.305289	3.50879	3.39381	2.25776	7.93293	6.18237	4.53768	5.12832	2.43599	5.23625	7.87916	11.2233	8.15914	2.25472	4.24294	1.31413	0
ENSOART00000000948.1	126.65	151.076	139.703	144.548	139.078	107.455	106.705	118.149	100.061	135.32	0.147891	0	15.7624	57.006	17.8652	0	0.0581381	32.2293	86.9121	49.7033
ENSOART00000000950.1	1.00221	0.352956	0.164685	0.102332	0.04425	0.626506	1.32406	3.68074	1.68719	0.730404	2.46778	2.6344	2.98151	7.61489	5.7496	8.64121	6.81615	7.74595	5.65639	7.57978
ENSOART00000000952.1	2.52222	0.709452	0.278865	0	0.159473	1.98261	3.4874	9.67871	5.37669	2.53721	7.23264	6.89586	8.58657	22.6519	15.3158	17.8226	18.9988	20.5197	12.3223	16.6654
ENSOART00000000953.1	0	0.0561928	0	0	0	0	0.0166248	0	0	0	0	0.0132647	0.0128947	0	0.0739834	0.0229699	0.0304687	0.0179359	0	0.0409624
ENSOART00000000951.1	17.8165	17.7514	17.1045	19.5917	20.7741	48.4523	71.4824	61.4669	51.5659	30.114	16.0565	16.8577	20.1335	16.0541	16.092	64.5616	54.6381	70.1099	76.2237	64.9915
ENSOART00000000954.1	244.154	196.812	134.656	135.895	142.586	177.532	159.784	206.526	191.86	209.009	112.477	92.8049	81.3792	97.558	90.2619	118.321	131.454	125.508	132.292	130.179
ENSOART00000000957.1	0	0	0	0	0	0	0	0	0	0	0.137961	0.231888	0.287533	0.388752	0.413578	0	0.0271269	0.0795602	0	0
ENSOART00000000958.1	0	0	0	0	0	0	0	0	0	0	0	0.0464417	0	0.0925797	0.0325817	0.0805407	0.246293	0.189006	0.0862455	0
ENSOART00000000960.1	17.4045	13.9811	8.80733	14.9005	13.031	22.3489	22.8276	15.3329	21.5636	21.8027	12.751	10.0129	9.88918	12.1965	12.0334	11.7318	16.5779	16.5019	19.2847	19.2652
ENSOART00000000959.1	0	0	0	0	0	0	0	0	0	0	0.648936	0.743423	0.202597	0.995788	0.633897	6.99652	5.03372	1.42676	1.80987	2.22728
ENSOART00000000961.1	7.99537	7.65104	7.88095	9.46394	7.76614	9.84801	12.3982	10.5914	10.6216	8.74206	31.0212	20.8015	24.088	40.3481	30.7665	41.5194	35.8183	63.2795	41.3681	36.0397
ENSOART00000000963.1	10.0778	7.17644	5.79716	6.21718	7.16765	8.89256	10.07	9.20653	9.85166	9.85499	7.13644	6.12773	5.74909	6.12142	6.54051	13.0197	15.8334	10.0453	15.4203	16.3335
ENSOART00000000972.1	0.592786	0.644004	0.483454	0.533784	0.481945	0.502752	0.524965	0.400632	0.521283	0.507172	0.875757	0.956962	0.702861	0.792712	0.739638	0.324456	0.484281	0.667333	0.633859	0.53269
ENSOART00000000973.1	12.5003	6.84278	5.24854	7.66044	4.96821	2.95649	0.594228	7.90373	3.22993	0.644703	4.0202	1.34301	0.758055	1.50431	1.41221	0.0534064	0.0520186	0.131698	0.0644449	0.13819
ENSOART00000000976.1	33.0375	52.383	36.1521	46.4627	54.2149	8.00474	9.65476	2.10618	8.56621	10.3674	24.8005	22.7759	25.8315	25.758	23.8939	1.08411	1.50807	2.50275	1.71081	1.91703
ENSOART00000000962.1	24.2162	9.03471	1.96135	3.06468	4.41074	61.6654	64.0579	120.938	89.189	83.7496	61.7123	39.1494	55.3862	92.5655	89.6432	67.3003	62.8017	86.4568	103.795	61.9625
ENSOART00000000964.1	273.237	210.262	149.416	171.087	181.961	222.894	246.323	235.192	252.786	291.153	106.116	81.8325	93.1717	103.752	114.188	180.149	205.452	128.395	192.079	224.985
ENSOART00000000965.1	0.36599	0.544459	0.790158	0.705276	1.05667	0.860769	1.62705	1.45976	2.03657	1.57485	0.0528819	0.289546	0.0766345	0.0696529	0.536803	0	0.092554	0.0118471	0	0.0271599
ENSOART00000000966.1	22.7695	24.8594	19.9393	26.0786	25.1899	13.7879	15.9203	17.2535	19.9443	19.3999	11.9168	10.7762	12.6972	11.2459	13.5793	11.6258	12.9962	20.6943	11.9691	14.7517
ENSOART00000000967.1	14.6706	12.0071	10.4974	13.0656	12.4672	13.3504	15.1239	12.5505	16.4769	13.4647	35.396	24.1823	26.0361	42.4024	38.0003	37.8016	34.3271	66.0726	29.2959	42.7268
ENSOART00000000968.1	0	0	0	0	0	0	0	0	0	0	0	0	0	0	0	0	0	0	0	0
ENSOART00000000969.1	17.8928	11.9826	13.7572	16.6023	50.1093	0.334766	0.0986859	0.143661	0.800409	0.710181	10.1341	8.19188	10.1599	17.7069	15.2711	0.549591	0.44427	0	0.297936	1.89035
ENSOART00000000970.1	0.0147887	0.0289973	0.0313523	0	0	0.0720367	0.0643843	0.0189933	0.0301859	0.0154975	1.16397	1.39757	1.16746	0.829743	1.01545	0.907139	1.23078	1.26325	1.26648	1.58921
ENSOART00000000971.1	0	0	0	0	0	0	0	0	0	0	0	0	0	0	0	0	0	0	0	0
ENSOART00000000975.1	22.6149	15.8667	13.4521	13.3468	12.9911	23.6149	24.2563	22.4809	20.4412	21.1524	8.06532	5.7075	5.17215	7.76308	6.9546	17.0791	22.1357	10.5291	27.3637	28.2228
ENSOART00000000980.1	91.8565	86.5123	74.7835	69.6436	99.672	69.8245	93.948	81.5576	117.812	119.351	46.7762	31.1894	46.4853	62.1092	44.5032	64.2568	52.7239	42.4139	50.0152	52.1396
ENSOART00000000974.1	0.754951	0.563535	0.211722	0.678062	0.584173	0.640845	1.52627	1.30157	0.723648	0.510074	1.1281	1.33855	0.77346	1.15512	1.35037	2.09901	2.62171	2.40502	1.57922	2.78016
ENSOART00000000979.1	10.1971	9.18181	3.22472	2.35448	2.86627	104.893	126.194	404.248	174.49	105.488	6.23056	4.04037	6.56383	10.7017	1.91494	1.09659	1.94567	0.940253	0.933743	1.88332
ENSOART00000000977.1	1.72303	0.212617	0.357886	0.280377	0.880423	0.864503	2.28812	0.921247	1.8463	1.76528	1.23255	1.26125	1.82968	1.91196	2.42866	2.42766	3.91175	3.05755	3.34381	3.84153
ENSOART00000000978.1	0.268663	0	0	0	0	0	0	0	0	0	0	0	0	0	0	0	0.273767	0	0	0
ENSOART00000000992.1	0.0104023	0.0204057	0.00554046	0.0109832	0.026783	0.0354924	0.095286	0.0335016	0.0319558	0.0273325	0.192369	0.177507	0.161403	0.153138	0.230962	0.425958	0.477579	0.712974	0.534537	0.449773
ENSOART00000000981.1	1.30245	0.607484	0.257413	0.518794	0.515588	0.301768	0.0535669	0.157061	0.0623256	0	5.4641	5.46359	5.29173	6.95907	6.65939	11.8832	10.2176	9.15026	8.7796	8.04499
ENSOART00000000982.1	4.86549	3.49839	3.07562	3.95793	6.65832	7.52533	12.3402	7.0541	14.9598	12.0845	2.56535	1.67509	1.98166	1.34454	2.50937	3.18934	2.42256	2.50306	2.4134	2.55844
ENSOART00000000983.1	6.79459	4.37226	2.37721	3.45633	2.3136	3.96403	3.40054	5.91602	3.18075	1.36009	40.9958	17.1632	49.0575	30.3203	34.3408	21.0913	28.0764	31.4169	42.294	45.9966
ENSOART00000000984.1	0	0	0	0	0	0	0	0	0	0	0	0	0	0	0	0	0	0	0	0
ENSOART00000000991.1	0.519339	1.0951	1.78295	1.34312	1.59775	1.4048	1.31921	1.60502	1.66113	0.852528	3.45783	4.22625	2.26858	3.29695	2.93983	9.68527	11.8039	9.4776	8.21173	7.69878
ENSOART00000000987.1	0	0	0	0	0	0	0	0	0	0	0	0	0	0	0	0	0	0	0	0
ENSOART00000000985.1	0	0	0	0	0	1.18118	0	0	0	0	0.477295	3.00842	3.47504	6.31798	6.23048	0.760282	2.67277	6.04084	3.34517	5.08203
ENSOART00000000986.1	0	0	0	0	0	1.63127	1.41563	0.926768	0.913543	0.504496	1.30645	0.139592	0.340655	1.31346	1.20354	0.234314	0.239756	0.502911	0.578346	0.342118
ENSOART00000000989.1	18.7008	16.6599	12.6597	12.9568	13.1922	13.2458	14.5303	15.4108	16.5538	16.2919	9.89894	8.45959	8.05659	8.8859	9.07761	16.6668	16.5999	16.8036	17.819	21.315
ENSOART00000000988.1	116.994	73.6708	82.4998	96.0054	115.912	32.6388	58.7988	58.1666	85.878	79.4082	70.2913	58.5545	68.8022	65.7305	73.5447	50.3727	70.5298	51.6629	49.936	74.6441
ENSOART00000000990.1	44.0751	33.7966	22.3511	29.4562	29.9983	37.1234	35.1745	32.738	40.5024	40.9906	7.50035	5.7131	6.75485	7.00826	8.39709	9.9417	18.7227	8.5178	16.7378	17.5199
ENSOART00000000994.1	85.7619	74.0262	45.916	54.9573	53.9403	68.7509	65.7704	64.8066	66.8887	70.7302	16.9948	15.1287	14.8116	14.1336	18.2342	23.5477	43.183	20.7126	33.5229	43.2664
ENSOART00000000997.1	22.9929	23.4009	15.2355	18.3986	17.3879	18.7972	26.5221	19.4399	22.636	20.3497	10.6421	8.53821	8.6803	10.5399	11.1306	14.6015	16.0365	14.8205	18.1108	19.9993
ENSOART00000000999.1	0	0.0254207	0	0.0182348	0	0	0	0	0	0	0	0.0962097	0	0.119238	0.0918125	0.14562	0.121219	0.146015	0.2072	0
ENSOART00000001004.1	0	0	0	0	0	0	0.0158076	0	0	0.0190364	0.106533	0	0.0305854	0	0	0	0	1.2752e-06	0	0.0977763
ENSOART00000000993.1	13.3186	9.47312	8.69146	7.82582	9.92944	14.1915	16.8596	11.0114	17.0185	11.4206	6.85131	6.12004	6.12957	5.18593	6.76321	13.6713	13.9239	10.7863	12.3144	11.564
ENSOART00000000995.1	0	0	0	0.35399	0	0	0	0	0	0	0.270535	0	0	0	0	0.41358	0.343695	0	0	0.69894
ENSOART00000000996.1	0	0	0	0	0	0	0	0	0	0	0	0	0	0	0	0	0	0	0	0
ENSOART00000000998.1	2.37381	2.8486	2.65891	3.19563	3.44281	2.56561	3.20987	2.5046	3.93201	2.88608	2.48391	2.47656	2.43777	2.26654	2.94258	2.5592	3.74332	4.0226	3.2531	5.00178
ENSOART00000001000.1	0	0.145161	0.328719	0.19883	0.0506566	0	0.0822544	0	0.24573	0.136492	0.291214	0.438441	0.15614	0.234332	0.575855	0.306035	0.414405	0	0.183233	0.483236
ENSOART00000001005.1	0.0197957	0.0776116	0.12558	0.14592	0.0841967	0.0192787	0.0516582	0	0	0	0.0827062	0.0824323	0.0267158	0.200248	0.0766501	0.0475849	0.151503	0.0371593	0.23733	0.127247
ENSOART00000001006.1	8.8279	8.94042	5.63518	7.26881	7.63769	10.4282	12.5792	8.79818	10.9204	10.6665	4.92641	4.95266	4.19377	4.18261	4.44187	5.33996	5.2749	8.18498	5.17822	6.27406
ENSOART00000001008.1	2.87521	1.04084	0.348168	0.508044	0.502756	4.94085	9.17153	8.63913	11.1594	10.3948	4.64879	4.22298	4.80577	5.84489	4.89438	3.84707	3.56015	3.84754	3.66471	3.72695
ENSOART00000001009.1	3.13588e-08	6.34665e-11	3.94919e-09	3.69891e-09	2.42616e-09	1.15043e-08	6.1006e-08	5.12043e-08	1.55044e-07	7.39915e-08	9.05992e-08	2.10157e-08	2.15998e-10	2.73574e-08	2.49321e-08	5.69541e-09	0.204831	0.310597	8.88537e-10	0.717373
ENSOART00000001002.1	0	0	0	0	0	0	0	0	0.0105814	0	0	0.0144022	0.00698423	0	0	0	0.00330072	0	0	0
ENSOART00000001001.1	2.01235	1.72734	1.16839	1.40416	1.73811	2.2881	2.43913	1.98639	2.13092	2.10702	0.929471	0.527306	0.580484	0.823661	0.936886	1.39211	2.16856	2.68654	1.76828	3.18495
ENSOART00000001003.1	17.1285	16.4155	8.51405	13.3691	12.4074	16.0018	22.0681	17.6824	18.581	21.0036	8.1919	5.50287	4.2988	7.09953	7.61835	9.25221	13.8304	17.3428	12.0306	18.8326
ENSOART00000001007.1	22.2015	20.9525	15.2417	18.7222	17.6389	23.3671	25.942	34.4006	32.5371	27.7803	29.8857	26.3195	27.3744	26.8275	29.0652	29.9977	28.0226	46.5418	29.6526	35.5372
ENSOART00000001016.1	19.5598	31.7509	20.8523	25.0333	26.8141	17.6178	19.2502	20.6282	22.3915	21.3857	39.8123	33.8386	28.2617	26.5923	31.3171	16.6847	18.4188	21.1916	21.3724	27.0961
ENSOART00000001010.1	56.4711	68.4936	56.9095	56.0609	62.5367	52.3749	64.3958	58.3769	61.8523	58.8598	34.5512	32.1875	32.4974	32.3115	31.3343	51.7345	57.9488	53.7425	68.5454	63.2538
ENSOART00000001051.1	2.92869	1.65318	0.537629	0.810343	0.931681	2.72594	1.30615	1.52965	1.45954	1.22723	5.03678	5.29608	4.9696	16.6644	11.8379	16.3473	21.0746	24.0398	12.0622	22.9579
ENSOART00000001011.1	1.19772	1.25427	1.94257	0.802253	0.924201	0.831229	0.368316	0.216247	0.689567	0.534232	0.984346	0.527553	0.806632	0.7071	0.665294	1.12391	0.628049	1.12269	0.586568	1.07709
ENSOART00000001014.1	11.0919	7.02274	5.30843	6.11313	5.93403	10.3922	11.4828	9.63116	11.5957	11.8485	15.3071	12.4198	12.694	18.9035	16.7434	16.7174	16.9155	19.3289	13.403	19.4228
ENSOART00000001012.1	11.9102	8.73559	10.3281	11.2757	13.9053	11.548	16.5315	16.3726	23.1394	15.2184	9.42581	8.9153	10.9303	10.5254	14.2529	43.7361	28.1101	68.2521	29.2412	35.1807
ENSOART00000001015.1	65.4096	47.1842	58.7137	54.1	49.3525	58.7431	70.287	55.4926	65.7354	63.4726	29.4808	21.4021	22.2236	30.1144	32.0295	42.5748	44.8415	41.3592	61.5318	55.0917
ENSOART00000001013.1	0	0	0	0	0	0	0	0	0	0	0	0	0	0	0	0	0	0	0	0
ENSOART00000001017.1	166.393	110.666	67.7926	84.0251	71.6791	94.7426	137.464	124.641	124.175	114.876	20.2021	15.2409	16.1829	20.3096	17.6284	27.2456	28.9023	36.5005	27.0873	32.6276
ENSOART00000001018.1	266.889	307.814	321.235	288.613	307.004	250.073	241.011	250.093	251.447	273.016	93.5311	96.3466	84.6506	18.3744	144.453	152.803	169.306	147.134	35.2871	350.613
ENSOART00000001080.1	0.0549885	0	0	0	0.00471846	0.519963	0.494075	0.729565	0.653105	1.00552	28.7516	62.0595	37.0144	34.2472	35.1641	138.738	157.923	119.716	166.473	159.97
ENSOART00000001020.1	0	0	0	0	0	0	0.0800021	0.0587356	0.186552	0.0959954	0	0.0318779	0	0.0424646	0	0	0.0737332	0	0	0
ENSOART00000001024.1	39.3461	29.042	21.4051	27.0896	25.1872	35.4433	44.8821	39.613	39.7632	41.5974	18.867	14.7779	19.7006	22.5168	15.5303	19.6261	21.3663	19.6789	22.9634	23.1829
ENSOART00000001019.1	0.500366	0.794835	0.788239	0.811931	0.658293	0.513403	0.447174	0.486079	0.607005	0.524364	0.713659	0.610457	0.674608	0.820256	0.849142	0.227847	0.340354	0.494652	0.359786	0.203433
ENSOART00000001023.1	1.17862	0.74245	0.616553	0.657229	0.706335	0.823857	1.10528	0.868662	0.780894	0.603832	1.2671	1.39351	1.10179	1.18653	1.41304	1.50375	1.91723	2.12902	1.40343	2.31094
ENSOART00000001022.1	0	0	0	0	0	0	0	0	0	0	0	0	0	0	0	0.100547	0.267686	0.0393695	0.143723	0.0886932
ENSOART00000001021.1	10.1172	21.0917	15.4933	16.1026	15.6349	19.8102	39.935	48.1355	55.8067	52.4086	11.6093	15.0154	7.80494	21.3646	10.3214	16.8038	15.028	17.3392	25.8608	18.5993
ENSOART00000001025.1	2.796	3.51896	3.35299	3.31892	3.67464	2.69691	3.85565	3.90687	4.92918	3.21499	1.13331	2.55994	0.830927	1.74524	1.51636	10.5661	11.9682	12.6619	9.95046	6.07912
ENSOART00000001026.1	23.9054	10.6452	13.941	13.7526	29.6974	17.4366	19.5854	16.2024	33.0915	29.025	9.30018	5.54917	8.2975	10.2047	13.4146	18.7059	6.77251	17.3065	5.7215	8.33164
ENSOART00000001027.1	17.7301	13.4096	15.564	12.9993	12.7633	16.7803	23.1253	18.602	18.9853	16.1626	18.5471	18.2955	12.1267	17.4528	15.1285	25.7131	37.3656	27.7072	32.8612	42.987
ENSOART00000001041.1	32.8526	20.2588	14.3536	19.2882	18.9151	26.9415	27.2313	22.5613	25.9132	25.7578	11.9033	11.5142	10.2362	12.945	12.0405	28.7831	36.5941	29.5118	31.7119	40.4248
ENSOART00000001028.1	0	0	0	0	0	0	0.0585891	0	0	0	2.00782	2.00765	1.75007	0.874688	3.64956	4.95935	6.28208	4.21502	4.37251	5.38538
ENSOART00000001034.1	0.485415	0.224006	0.303492	0.19079	0.301446	1.18731	1.73391	2.17952	2.22854	1.37866	1.58932	0.88738	1.04669	1.077	1.48969	7.33192	10.2544	3.61887	12.0476	10.4869
ENSOART00000001030.1	22.5324	14.027	10.1267	10.685	11.2695	12.4643	22.5257	29.6069	24.287	20.325	11.8927	8.9791	8.1501	7.71053	8.10859	21.6356	14.4745	17.9153	13.8857	11.8441
ENSOART00000001029.1	13.9861	10.3674	8.66749	9.24555	21.8692	16.0172	15.9379	13.3055	31.47	26.5714	7.4998	5.42123	5.41937	7.1319	9.14435	22.4556	15.0133	16.8482	11.6214	12.592
ENSOART00000001031.1	43.105	33.2901	33.8498	34.2404	45.9905	45.4462	53.5133	46.9611	48.4893	49.7253	26.3502	22.1105	23.2668	30.6313	24.0344	44.042	46.7431	40.9139	42.7274	48.0104
ENSOART00000001033.1	22.4239	12.4824	9.06894	9.28492	10.8603	13.2074	16.7158	12.725	12.743	14.5336	6.14264	6.15519	8.85922	9.34563	10.3067	13.074	15.5245	16.8122	15.1003	17.9649
ENSOART00000001032.1	0.400955	0	0.204051	0.0732502	0.183486	0.198155	0.119304	0.0833865	0.209543	0.144905	0	0	0	0.05808	0	0	0.0805101	0	0.0614513	0
ENSOART00000001036.1	0.650802	0.654422	0.544589	0.961895	0.917676	0.759019	1.40777	1.45791	1.33859	0.713439	1.39563	1.19253	1.16153	0.765831	1.0321	1.28972	1.65298	1.00623	1.32139	1.08647
ENSOART00000001035.1	1.50997	0.899415	0.476363	1.09772	0.490481	0.894551	0.170012	0.581347	1.12052	0.951832	5.82825	3.97288	3.9607	4.53012	6.41088	1.72871	1.09272	1.6044	2.02849	2.05677
ENSOART00000001048.1	0.0373182	0.0366009	0.112574	0.0590924	0.14937	0.00606284	0.00542489	0	0	0	0.0522602	0.0909493	0.0587433	0.103005	0.10209	0.381976	0.432299	0.327015	0.335586	0.779397
ENSOART00000001039.1	0.986799	1.19807	1.86865	0.99124	1.95158	1.25945	2.48957	1.54934	1.14519	0.924012	0.507753	0.624774	0.42616	0.422453	0.529846	2.18507	2.57488	1.12969	1.33336	3.15622
ENSOART00000001042.1	18.8562	16.6386	8.87852	13.1684	13.4957	12.531	13.9188	12.0417	12.1474	10.2609	15.8489	12.4247	10.6633	13.0011	14.0233	21.1741	29.408	28.1858	21.0132	32.4251
ENSOART00000001043.1	34.8507	26.5089	14.9301	10.7946	17.957	26.2794	18.1256	28.0997	23.3347	19.8289	1.05167	1.63537	2.8978	1.82871	2.29254	3.38569	4.2301	3.9566	2.56089	2.86967
ENSOART00000001037.1	0	0	0	0	0	0	0	0	0	0	0	0	0	0	0	0	0	0	0	0
ENSOART00000001038.1	3.5716	2.65062	1.1541	1.52141	1.26434	1.70945	1.72611	1.40676	1.78186	1.30721	2.17824	1.34121	1.37734	3.43119	2.71437	8.64587	5.73932	5.93981	7.9592	7.66014
ENSOART00000001040.1	0.703802	0.222246	0	0.490378	0.58333	0	0.398924	0.575077	0	0	0.759643	0.80521	0.152675	0.424954	1.10812	0	0.674454	0.216737	0.400342	0
ENSOART00000001045.1	0	0	0	0	0	0	0	0	0	0	0	0	0	0	0	0	0.0345883	0	0.0571731	0
ENSOART00000001046.1	89.841	70.194	42.0699	51.5556	54.855	75.165	67.5734	58.9189	68.3346	72.4993	16.2093	12.8861	13.6959	13.8443	15.6958	7.15418	7.81997	9.36263	8.75135	12.5768
ENSOART00000001047.1	56.9504	55.757	50.6833	52.2177	64.1113	48.6404	55.1689	61.7707	70.2397	68.3481	26.4757	27.2832	24.9256	28.138	26.2754	203.253	95.3174	251.426	135.415	99.4201
ENSOART00000001044.1	0.118404	0	0.120785	0.245319	0	0	0	0	0	0	0.0958125	0.0809654	0.0809538	0.219239	0.116334	1.69853	0.749309	0.444945	0.920437	1.97267
ENSOART00000001049.1	2.55113	0.403613	0.457333	1.0939	0.897575	0.826128	0.814038	1.26102	1.16067	0.37081	0.255735	0.230826	0.483089	0	0.288647	0.143413	0.285123	0.636811	0.598384	0.468411
ENSOART00000001055.1	9.87623	7.03541	5.66579	6.0357	7.54837	6.59001	7.9805	7.75433	13.0956	11.6545	7.97452	6.01385	6.37517	8.50811	8.21668	15.7354	18.4285	12.2213	17.4793	16.999
ENSOART00000001052.1	13.7096	10.7912	6.52463	8.56574	6.54824	14.2625	14.4512	11.9441	12.0556	14.504	4.14797	3.58521	3.65733	3.82255	3.81243	4.9339	9.04417	4.31959	10.1293	13.0575
ENSOART00000001054.1	4.37627	5.73161	3.52749	4.67692	6.28967	2.58534	2.7632	2.72956	4.97292	1.77545	2.4489	3.79144	4.58259	3.09261	11.7426	8.96358	7.7454	18.6178	4.47816	29.4779
ENSOART00000001053.1	9.90898	1.8508	0.957318	1.28362	1.06665	29.5583	9.93925	11.1493	16.8305	7.5256	15.1016	6.47749	9.42543	12.0627	9.94751	33.1447	37.242	16.3926	32.9372	45.6676
ENSOART00000001056.1	3.48843	2.90049	2.95276	2.59755	3.13302	2.87092	3.72722	3.13613	2.17929	2.99148	5.49323	4.59751	3.86437	3.85939	4.69309	7.7568	7.89132	8.15374	9.51759	9.08449
ENSOART00000001058.1	0	0	0	0	0	0	0	0	0	0	0	0	0	0	0	0	0	0	0	0
ENSOART00000001057.1	0	0	0	0.0132998	0	0	0	0	0.0140706	0	0	0.0615451	0.0582038	0.0327699	0.0134336	0	0	0	0	0
ENSOART00000001062.1	1.63902	2.08465	2.78547	2.03426	2.52334	0.969145	1.01842	2.47718	1.84891	1.12298	10.4196	4.25245	10.0987	2.5839	4.53287	2.53287	1.89154	4.13887	2.18892	1.75624
ENSOART00000001059.1	0	0	0	0	0	0	0	0	0	0	0	0	0	0	0	0	0	0	0	0
ENSOART00000001060.1	0.442442	0.585381	0.770942	0.628711	0.789257	0.452359	0.653961	0.736983	0.270236	0.254434	2.64088	3.59064	2.86624	3.41747	2.9565	12.147	36.5787	6.72687	39.612	72.5144
ENSOART00000001065.1	0	0	0	0	0	0	0	0	0	0	0	0	0	0	0	0	0	0	0	0
ENSOART00000001061.1	14.1743	12.4841	9.16584	11.1958	13.083	1.65073	2.23999	1.13434	1.91832	1.86985	14.1362	8.62594	7.45952	8.05074	15.6221	1.89866	2.4835	3.09728	1.27415	1.16573
ENSOART00000001063.1	0.110094	0.140736	0.0987711	0.151459	0.0797645	0.0664282	0.140217	0.0434911	0.0520011	0.00886755	0.639073	0.400741	0.478676	0.622185	0.270205	0.423349	1.04208	1.54585	0.990355	0.961849
ENSOART00000001066.1	18.6273	12.8905	8.83469	11.0738	11.4061	20.2388	19.5867	15.2043	18.2366	16.0846	12.5365	9.85671	9.58775	9.81905	10.054	10.2692	11.1102	13.2439	11.5504	13.7303
ENSOART00000001067.1	19.0255	13.8101	9.57885	9.94688	10.8066	17.0649	18.4224	17.0531	17.7391	19.2609	9.92676	7.97336	7.71433	10.5765	9.20353	21.9081	21.2239	19.2022	20.863	23.7034
ENSOART00000001064.1	0.617203	0.43814	0.492975	0.480311	0.476384	1.22286	1.04324	0.889033	0.698738	0.591516	0.730744	0.811132	0.628346	0.821518	0.797666	1.5499	1.87685	2.27152	1.31344	2.03564
ENSOART00000001079.1	4.09901	5.29461	4.24638	4.16705	4.50959	4.9028	6.48961	5.12665	5.85429	5.67594	3.10647	3.08042	2.25221	3.08189	2.97762	4.59219	6.04583	4.91933	6.19047	9.95918
ENSOART00000001069.1	0	0	0	0	0	0	0.72268	0	0.210073	0	0.338064	0.145631	0	0	0	0	0.0695423	0.202156	0	0
ENSOART00000001068.1	53.7426	47.0271	27.6945	32.7344	34.1631	41.7561	56.4419	76.6183	67.0805	56.4169	18.061	18.8963	18.221	20.903	19.3485	24.8737	21.3921	28.3738	26.3157	19.6964
ENSOART00000001081.1	21.6262	15.0186	7.665	12.0099	12.0831	19.5886	18.2651	8.82902	12.4696	14.7615	3.06822	3.15234	3.14762	5.21202	4.02628	13.5592	26.1194	7.50565	25.6985	36.2119
ENSOART00000001070.1	0	0.654269	0	0.278764	0.433534	0.520942	0.461671	0.836207	0	0.276043	0.108207	0	0.463676	0.6199	0.795708	0.964044	0.428402	1.5191	0.466693	0
ENSOART00000001073.1	0.179144	0	0.732043	0	0	0	0	0	0	0	0	0.249852	0	0	0	0	0.127499	0	0	0
ENSOART00000001075.1	23.1755	21.8303	9.44306	15.6327	16.2185	20.2192	25.5373	18.5144	23.3182	22.6938	9.1518	6.92191	4.76855	8.62279	10.0387	11.2359	15.8712	16.6291	13.1677	22.9046
ENSOART00000001071.1	13.3788	8.17348	6.80581	9.85415	11.5305	7.3087	7.00882	8.79186	9.15664	8.17845	19.918	13.6176	17.0471	22.2898	18.6074	10.5097	8.94305	14.5079	8.3283	10.9882
ENSOART00000001072.1	19.8612	9.84272	7.37831	14.5349	22.8808	83.8637	65.3726	34.1423	153.536	123.666	6.20483	5.58706	11.2939	27.5694	23.6758	145.974	65.9968	90.6126	76.3815	71.1484
ENSOART00000001074.1	19.5219	17.2344	11.7203	13.7327	14.9395	14.0546	18.1124	16.3824	15.907	15.3433	11.8881	9.26503	7.00948	8.96768	9.89035	14.4334	21.1122	14.3003	20.6188	31.988
ENSOART00000001076.1	0	0	0	0	0	0.0325254	0	0	0	0	0	0	0	0	0	0	0.0129285	0	0	0
ENSOART00000001078.1	0	0.251333	0	0	0	0	0	0	0	0	2.7071	1.44527	4.46093	2.53473	2.05262	0.314091	0.0870783	0	0	0
ENSOART00000001077.1	0.0213064	0	0	0	0	0	0	0	0	0	0	0	0	0	0	0	0	0	0	0
ENSOART00000001087.1	0.345591	2.27427e-07	0.369122	5.561e-06	4.43273e-06	1.76954e-06	2.76023e-06	4.38569e-06	1.41814	2.27616e-06	6.424e-06	2.05092e-06	5.2305e-08	3.54167e-07	2.08587e-06	1.52622e-06	0.311536	0.324509	4.55969e-07	0.749532
ENSOART00000001092.1	6.20971	8.30217	4.69301	5.90149	6.43261	4.35787	6.3672	5.43437	4.63241	6.03997	3.30196	2.8883	2.38936	2.8384	2.86281	5.26364	5.42593	7.04612	5.98525	5.79783
ENSOART00000001083.1	23.7121	17.2453	11.5963	12.0196	12.5507	19.9949	17.9032	18.2087	17.769	20.4378	9.39575	7.07206	5.45202	5.50349	9.69405	7.88329	10.03	7.39676	8.88612	13.5364
ENSOART00000001082.1	0	0	0	0	0	0	0	0	0	0	0	0	0.191966	0.132064	0.558094	0	0	0	0	0
ENSOART00000001089.1	17.4651	12.9449	8.29994	11.1904	10.5417	13.5937	11.3789	16.8064	11.8278	10.0625	9.60894	8.88683	8.45392	8.53387	8.05231	16.1106	19.961	22.8343	17.4446	23.7688
ENSOART00000001085.1	29.697	12.5346	10.6277	13.4114	6.67243	45.2851	19.1434	19.004	8.11671	6.83021	3.02714	3.6929	3.93902	2.45907	2.99598	3.01719	4.45714	4.25585	4.48071	6.16571
ENSOART00000001084.1	6.08501	1.81807	2.1852	3.41738	2.66215	4.32259	2.99067	2.20588	2.87484	2.80778	4.05013	4.63035	5.4402	4.1441	4.48908	19.1174	34.7411	5.89255	53.0406	47.6193
ENSOART00000001090.1	73.1555	37.3218	41.3844	42.7318	92.9408	57.608	53.5899	45.337	95.4038	80.2989	40.7247	29.4559	40.8484	50.8478	54.625	114.034	88.6132	93.1566	71.1571	90.9756
ENSOART00000001088.1	0	0	0	0	0	0.335632	0.0849099	1.11508	0	0	0	0	0	0	0	0	0.108563	0	0	0.786174
ENSOART00000001086.1	0	0	0	0	0	0	0	0	0	0	2.71224	2.89023	2.72696	2.11471	3.84522	11.5037	11.4583	9.70415	15.106	5.45406
ENSOART00000001093.1	8.65637	4.46784	5.02992	6.49498	7.99002	7.76041	7.84045	8.02444	11.7615	11.5973	11.8196	6.56286	9.01179	9.24464	9.65815	19.7949	10.7822	18.1735	11.4221	10.1955
ENSOART00000001101.1	8.55303	5.05956	3.66603	5.27333	5.62913	7.71913	6.75692	4.05029	5.31134	4.43793	5.57028	5.63662	5.23668	5.14142	5.77718	8.51337	16.2842	7.64021	15.9143	20.5532
ENSOART00000001091.1	0	0	0	0	0	0.035519	0.0475721	0	0.0742413	0.0190727	0	0	0	0.0167451	0.0352403	0	0.0813151	0.05127	0.140333	0.117153
ENSOART00000001095.1	1.68896	0.756836	1.17365	0.552509	0.518205	0.799488	1.74665	1.76283	1.66673	1.23238	1.74613	1.56052	0.949125	1.30647	1.9009	1.25852	2.4208	2.35144	2.39565	3.30838
ENSOART00000001096.1	17.6186	12.3832	8.01043	10.0278	10.4576	20.0222	20.5225	19.4887	19.8842	21.6477	6.27637	5.58774	5.49562	7.02245	6.6247	20.0033	19.6417	19.4291	20.4208	24.9159
ENSOART00000001097.1	0	0	0	0	0	0	0	0	0	0	0.013267	0	0	0	0	0.0190628	0	0	0	0
ENSOART00000001094.1	0	0	0	0	0.0308836	0.967682	0.66251	0.847391	0.507124	0.437613	0.486068	0.383382	0.0882181	0.0911078	0.366308	1.30001	1.37994	2.34057	0.512748	1.95775
ENSOART00000001099.1	17.2799	7.4896	12.6878	12.0343	27.7277	14.9871	15.565	14.4792	28.7625	27.4653	8.6461	7.01969	10.9821	13.7466	14.925	30.7387	21.76	26.7291	18.2322	24.3089
ENSOART00000001098.1	0.138312	0.0775028	0.0839889	0.0729555	0.0845471	0.182929	20.1661	33.5873	17.5739	2.35365	1.26816	1.04471	1.33306	0.781607	0.754091	1.04637	1.76715	0.222594	0.947613	3.19453
ENSOART00000001100.1	0	0	0	0	0	0	0	0.289615	0	0	0	0	0	0	0.232662	0	0	0	0	0
ENSOART00000001102.1	0.204309	0.0500217	0	0	0.0426661	0.4471	0.706791	1.49089	1.38967	1.11294	0	0	0	0	0	0	0.293501	0	0	0
ENSOART00000001103.1	0	0	0	0	0	0	0	0	0	0	0	0	0	0	0	0	0	0	0	0
ENSOART00000001107.1	7.99538	6.81437	4.9689	5.33796	5.33716	7.60556	9.38815	8.34975	7.27201	6.93459	7.65525	11.3946	8.06752	11.2113	10.8892	35.5	33.1845	50.7519	25.4375	28.8837
ENSOART00000001104.1	30.8888	21.2459	15.816	18.6735	20.2226	21.0756	16.5488	21.1414	25.014	26.1671	31.1623	23.4502	24.3479	33.3373	32.9943	65.6075	72.1312	60.0443	74.8765	82.7569
ENSOART00000001105.1	8.33847	6.8132	3.50902	5.32341	5.14332	0.946631	2.23599	5.41204	6.08306	5.19422	24.7213	16.259	23.1097	21.5632	38.6972	17.9585	23.2782	15.4988	22.5897	24.9253
ENSOART00000001118.1	2.75859	2.72137	2.57145	2.65223	3.49764	3.09311	4.08312	3.90138	3.62851	2.96764	2.71972	3.19585	3.10684	2.78619	2.95932	5.11855	6.48352	6.70725	5.92873	7.20854
ENSOART00000001114.1	2.62579	1.89319	1.41779	1.5942	1.67945	2.03194	2.78796	2.05703	2.10833	2.0719	1.63759	1.31982	0.833681	0.964159	1.50336	2.53582	3.39467	3.50073	2.40937	5.32366
ENSOART00000001106.1	1.51018	0.745219	0	1.21034	0.615275	0.748377	0	0	0.389575	0	3.09317	0.270586	0.84334	0	0.395698	9.00689	0.524937	0.76649	0.707243	0
ENSOART00000001110.1	0	0	0	0	0	0	0	0	0	0	0	0	0	0	0	0	0	0.0601945	0	0
ENSOART00000001108.1	16.134	18.4261	12.4657	15.4577	18.7529	16.3415	22.1475	19.8312	22.1739	20.1749	6.46133	6.12366	5.55937	5.75648	7.01786	5.97001	7.19268	10.7269	7.6604	10.5977
ENSOART00000001115.1	41.4714	27.5324	19.2905	25.1156	24.7493	32.9828	38.6996	33.7463	34.9244	38.1777	16.5386	14.2848	14.9877	16.1491	17.7707	23.003	26.892	20.6414	28.3555	31.537
ENSOART00000001109.1	99.4109	77.7437	46.0054	57.2694	55.6345	70.6103	69.8832	84.0179	73.8594	67.0006	55.0862	50.1169	43.7659	62.3504	58.2148	139.48	148.575	166.659	152.083	182.483
ENSOART00000001113.1	216.706	131.719	78.6566	81.0562	76.4068	165.093	142.069	179.224	161.393	195.299	76.6603	63.4909	54.979	74.9444	63.3628	69.0979	63.8182	61.1499	65.7325	55.7377
ENSOART00000001117.1	0	0	0	0	0.0072023	4.34086	1.85414	0.645684	0.218441	0.0618007	0.0141175	0	0.0113455	0	0.0324877	0.0404889	0.00536186	0.00789406	0	0.126996
ENSOART00000001112.1	0.0787939	0.0771692	0	0.0826321	0.0662268	0.191589	0.170686	0.150584	0.119542	0.0819621	0.0979909	0.0816377	0.0531888	0.108627	0.076541	0.141648	0.226177	0.0369637	0.134935	0.333595
ENSOART00000001111.1	0.0478806	0	0	0	0.0396091	0	0.0826496	0	0	0	0	0	0.0322636	0.0442619	0	0.0572341	0.106475	0	0	0.204333
ENSOART00000001116.1	0	0.0310016	0.0332587	0.0332535	0	0	0.0549267	0.0808547	0.0321023	0	0.0789512	0.0218982	0.0854371	0.0581807	0.0614005	0.113907	0.121121	0.207858	0.243887	0.0673222
ENSOART00000001122.1	0	0	0	0	0	0	0	0	0	0	0	0	0	0	0	0	0	0	0	0
ENSOART00000001123.1	23.7309	21.3278	15.541	20.5168	24.8763	19.1896	22.9157	26.2309	27.7522	25.3524	10.9667	8.17387	8.3035	9.8172	10.4047	16.5447	12.3528	12.5316	13.4598	14.9992
ENSOART00000001121.1	3.59259	1.23624	0.949941	0.805023	0.910693	1.60057	1.34661	1.00486	0.876299	0.859953	0.926394	0.596911	0.683418	0.896263	1.16524	3.055	2.18766	5.82916	2.42195	2.90833
ENSOART00000001120.1	113.626	94.5312	63.1051	88.8516	90.1132	65.8676	127.222	68.7147	115.803	99.6349	31.3821	16.7316	36.2748	25.6853	25.9037	102.154	122.47	106.323	126.546	111.131
ENSOART00000001119.1	93.3292	93.3307	72.9872	81.2847	71.7318	83.8342	75.4097	103.831	95.4731	85.9776	79.4544	71.6409	67.1116	65.2304	80.2668	98.5862	103.846	113.578	100.685	115.719
ENSOART00000001124.1	0.0905523	0.120906	0.06987	0.0693791	0.0704737	0.136138	0.172263	0.0528857	0.0588271	0.0604108	0.324459	0.160615	0.150049	0.136062	0.254286	0.347128	0.467382	0.418338	0.260444	0.283724
ENSOART00000001125.1	0	0	0	0	0	6.45086	2.15996	1.28238	0.329656	0.0858338	0.0294014	0	0.0157743	0	0.0112988	0	0.00372741	0	0	0.100689
ENSOART00000001137.1	15.5865	7.376	4.38536	6.75958	6.89948	17.4948	13.3722	11.4774	13.6852	13.4337	5.6578	4.4621	4.18101	4.05593	4.93621	15.486	18.5756	14.1119	19.3845	26.706
ENSOART00000001139.1	22.7235	14.9268	7.92783	9.58011	9.56542	15.6358	12.1626	12.4629	12.9207	12.3806	9.17673	8.53576	7.33163	6.59639	7.77204	14.5978	14.7372	21.2109	13.9227	13.4985
ENSOART00000001128.1	12.32	11.3776	6.26477	6.0477	7.89603	4.51514	5.43024	3.66019	6.72542	7.80257	6.84371	5.36049	5.55811	9.44479	10.5586	1.39327	0.614024	1.77389	0.778687	0.344232
ENSOART00000001127.1	0.39245	0.372692	0.445023	0.324192	0.320369	0.380988	0.884424	0.48659	0.595325	0.356768	0.698846	0.615083	0.542498	0.445298	0.586912	0.833866	0.879792	1.1852	0.832012	1.25889
ENSOART00000001126.1	0.353039	0.0864879	0.18193	0	0	3.65444	1.27427	0.4448	0.353744	0.273887	0.864889	0.31527	0.783472	0.570469	0.433286	1.16508	1.66251	3.29556	0.913635	0
ENSOART00000001130.1	3.36764	4.07657	7.70997	6.22254	4.3853	46.3075	42.6633	58.361	38.6047	17.0486	66.6093	54.3204	50.494	68.1209	51.8287	1248.16	810.308	1161.78	858.992	551.777
ENSOART00000001129.1	0	0.011382	0	0	0	0	0.0101137	0	0	0	0.0973201	0.0726507	0.0704859	0.042712	0.0224386	0.0139677	0.0814274	0.0217941	0.0795288	0.14998
ENSOART00000001136.1	26.9281	23.952	16.5189	20.5108	24.0788	31.1524	31.4337	24.8108	31.1079	25.0728	24.718	20.264	25.5718	20.3176	25.5353	36.0457	38.1793	49.6317	34.5383	45.057
ENSOART00000001132.1	0.141831	0	0	0	0	0	0	0	0.0711622	0	0	0.0487421	0	0.0652783	0.138745	0	0	0	0	0
ENSOART00000001131.1	148.813	66.5635	26.8171	44.4735	47.2046	195.63	202.867	301.257	218.668	164.66	318.778	234.666	185.313	220.512	214.146	373.406	238.732	339.509	252.162	178.343
ENSOART00000001140.1	0.232213	0.00583982	0	0	0.00510776	0.121887	0	0	0	0	7.89047	8.07286	8.43531	5.84532	9.67499	3.98666	4.17261	6.54624	4.64043	4.69621
ENSOART00000001133.1	0	0	0	0	0	0	0	0	0	0	0	0	0	0	0	0	0.00993046	0	0	0
ENSOART00000001134.1	0	0	0	0	0	0	0	0	0	0	0.228734	0	0	0.131003	0	0	0.0922244	0	0	0
ENSOART00000001135.1	0	0	0	0	0	0	0	0	0	0	0	0	0	0	0	0	0	0	0	0
ENSOART00000001146.1	0	0	0	0	0	0	0.00799443	0	0	0	0.0230898	0.070196	0.0185621	0.0421854	0.0354397	0.0772744	0.137434	0.129149	0.157086	0.0593359
ENSOART00000001138.1	0.455423	0.559905	0.191201	0.426581	0.269549	0.381406	0.576233	0.487345	0.466153	0.343696	0.635924	0.634213	0.411096	0.466227	0.538837	0.733777	1.17389	1.22369	0.835013	1.66283
ENSOART00000001145.1	40.7393	34.8506	25.1791	26.6051	27.4263	42.2208	43.6911	43.1277	44.6994	40.5386	24.7851	18.363	18.2968	19.6464	22.4161	33.8904	36.5779	34.4546	38.5333	48.1916
ENSOART00000001142.1	0	0	0	0	0	0.23872	0.481167	0.243106	0.324164	0.166023	0.181271	0	0.0662571	0.0090345	0.00951503	0.397634	0.367717	1.35447	0.294337	0.9209
ENSOART00000001141.1	0	0	0	0	0	0	0	0	0	0	0.0200957	0.0666785	0.0404363	0.0330783	0.0926883	0.0865348	0.110837	0.0112524	0.605653	0.361284
ENSOART00000001162.1	19.9181	14.1962	10.1659	12.7464	16.6257	25.4077	32.4768	23.9904	32.3173	28.1889	11.836	10.001	9.97004	9.68894	11.4867	18.183	23.2996	33.3108	22.3513	30.4245
ENSOART00000001150.1	0.361709	0.495306	0.559315	0.792405	0.479815	1.02445	1.10704	0.966599	0.887029	0.681082	0.934468	0.9598	0.704433	0.68441	0.863315	4.67578	2.53278	6.99054	3.52445	5.39465
ENSOART00000001143.1	0.0738295	0.0716979	0.0334191	0.0667614	0.0987752	0.0624233	0.129322	0.121142	0.0321887	0.0331255	0.182683	0.349146	0.113368	0.34427	0.401931	1.66142	1.57643	4.8717	2.78137	1.99117
ENSOART00000001153.1	0.0100379	0.0689022	0.234655	1.10126	1.34855	0.0293465	0.0262454	0	0.0307841	0	0.202105	0.230442	0.189623	0.22162	0.310364	0.591971	0.278447	0.838689	1.08316	0.324546
ENSOART00000001144.1	0	0	0	0	0	5.61785	2.06078	0.352063	0.140511	0	63.3845	0	0.489013	0.130299	170.077	0	0	0	0	0.289754
ENSOART00000001151.1	12.009	6.81433	6.90328	7.34176	17.9589	11.2269	13.8713	9.12569	31.6276	25.1454	4.46835	3.32546	4.83542	5.83448	6.84789	13.1485	8.92397	11.4563	6.88667	8.08882
ENSOART00000001147.1	23.0912	19.2814	15.4235	12.6061	12.7099	20.2033	24.0714	24.2616	23.8755	25.665	15.779	12.6516	12.6835	17.8794	13.5043	26.4276	34.3797	20.9071	28.5506	34.8688
ENSOART00000001152.1	235.291	387.644	387.767	387.322	507.857	457.771	558.814	739.824	658.67	540.798	199.063	158.73	164.061	233.948	182.341	294.688	278.577	320.527	320.699	291.305
ENSOART00000001156.1	17.5156	1.47872	10.2119	7.19481	23.5125	7.9978	7.7722	3.51899	37.9448	37.2132	6.53964	1.74131	8.14715	22.3607	18.8406	38.5246	42.5294	40.3531	16.0078	47.167
ENSOART00000001157.1	18.1502	23.6896	4.64781	12.8518	0	24.9882	25.6237	32.7311	0	0.000108265	15.2572	16.5513	10.5713	0.705631	0.000120597	4.91333e-10	1.3204	0.025386	23.5036	1.94349
ENSOART00000001148.1	7.76759	6.67443	9.53199	7.08895	15.1849	8.12296	10.6194	7.3168	13.893	11.2489	10.1978	8.20376	8.04382	13.4411	12.2849	31.7616	31.5231	23.6729	29.4958	29.2018
ENSOART00000001149.1	0	0	0	0	0	0	0	0	0	0	0.0793869	0.066956	0.133329	0.089924	0.095959	0.584329	0.37654	0.459965	0.168342	0.403058
ENSOART00000001154.1	0.258078	0.185665	0.157895	0.178419	0.145561	0.289573	0.452235	0.287599	0.345178	0.277047	0.434133	0.468906	0.422918	0.489174	0.441485	0.6128	0.963226	0.984176	0.704826	1.42234
ENSOART00000001166.1	4.47807	3.55741	4.0441	2.37204	3.81772	1.79476	5.23788	5.39776	3.60518	2.55309	3.35182	3.34725	1.94948	1.59128	2.25735	5.28572	4.47629	3.91761	4.00381	6.30904
ENSOART00000001168.1	10.1418	13.2545	9.12189	10.9592	12.1172	9.48432	15.8099	17.4371	20.2527	13.2295	7.17819	7.43147	7.15319	6.67912	7.34406	11.3137	11.3934	14.6367	11.9412	7.9236
ENSOART00000001155.1	3.06381	3.97234	3.66355	2.69022	2.79402	3.14491	5.0039	2.68528	3.93146	3.20899	2.82544	2.45988	2.44518	2.59061	2.46995	2.63433	4.28606	3.23144	4.21777	4.98657
ENSOART00000001158.1	0.0225531	0.0442054	0.0238118	0.0712121	0.0383059	1.22975	0.529393	0.317831	0.114775	0	29.0081	20.8507	22.6919	26.9595	35.91	0	0.00719219	0.0423324	0	0.192971
ENSOART00000001160.1	28.3809	27.4029	16.1949	28.8112	23.529	29.0803	34.6461	21.2114	23.722	27.7548	16.9244	18.9182	18.5288	17.1049	17.4735	21.6473	26.7296	30.8615	29.3582	27.1712
ENSOART00000001161.1	56.7227	38.3929	29.6546	25.6453	43.4678	55.5239	61.1494	46.7769	76.9239	73.0705	10.733	9.04861	12.1649	12.9986	14.2123	22.6226	24.181	25.9143	21.3078	25.1488
ENSOART00000001165.1	21.8283	16.6426	13.4965	15.2964	15.6702	16.4459	21.3736	14.6532	18.3026	17.5657	13.8164	12.7072	11.4849	13.323	13.5659	22.4919	26.5492	20.5938	28.3804	25.6803
ENSOART00000001163.1	0	0	0	0	0	0	0	0	0	0	0.757282	2.03858	0.438631	1.30947	0.19395	10.1182	4.75529	3.7639	0	1.58372
ENSOART00000001170.1	24.9835	20.2308	10.6819	15.6207	16.8734	23.1403	26.594	23.3368	29.8916	26.1093	11.8896	9.77607	10.2227	10.2348	11.146	18.2571	23.438	21.6907	22.4896	29.0051
ENSOART00000001164.1	0	0	0	0	0	0	0	0	0	0	0	0	0	0	0.182603	0	0	0	0	0
ENSOART00000001167.1	8.77057	7.30948	6.97492	8.98405	9.02936	45.4197	85.5721	78.3898	105.333	66.6658	12.834	10.1474	11.2204	6.6966	8.07159	45.0845	36.7503	71.9756	38.4622	33.0211
ENSOART00000001172.1	149.284	123.303	97.9988	112.489	134.092	159.284	184.789	151.653	177.779	174.882	84.3003	79.8736	79.2204	80.9306	80.1109	159.027	190.455	138.073	203.12	200.178
ENSOART00000001169.1	0.674407	0	0	0.0879974	0	4.15124	2.20392	0.531966	0.337878	0.261659	1.03471	1.3222	0.575066	0.388752	0.909871	1.82043	1.85895	2.66103	0.87217	1.05125
ENSOART00000001171.1	22.9545	20.0321	20.0845	18.8494	17.317	17.1714	18.9411	23.8457	24.1215	22.449	17.4207	13.5624	12.6008	14.9923	15.13	29.2565	29.5742	23.109	33.753	32.0506
ENSOART00000001173.1	0	0	0	0	0	0	0	0	0	0	0	0.0333516	0.0649261	0.0663469	0.0699058	0.231131	0.306821	0.722323	0.308952	0.0514032
ENSOART00000001202.1	22.9788	12.0442	8.6986	13.0926	10.9262	14.9605	15.4337	14.8162	17.2638	14.3838	13.6752	12.6236	11.9	13.1049	12.6908	16.4643	18.5052	15.6595	18.5993	21.7206
ENSOART00000001189.1	0	0	0	0	0	0	0	0	0	0	0	0	0	0	0	0	0	0	0	0
ENSOART00000001175.1	2549.19	1928.8	1702.73	1805.4	1848.16	1200.77	1356.47	1263.49	1469.18	1612.18	937.244	734.297	751.56	305.977	912.405	1842.22	2407.46	1639.33	772.616	2366.18
ENSOART00000001174.1	2.26873	0.80608	1.11341	1.02703	3.40294	1.06799	1.08706	0.977631	1.98877	1.83471	0.777554	0.560699	0.698611	1.10637	1.03086	2.41722	2.13144	2.52979	1.39523	2.12654
ENSOART00000001178.1	57.2893	43.1235	37.5847	43.4445	53.6437	54.2578	62.1403	60.7518	67.3572	60.5212	36.5424	30.2149	34.0084	38.5847	34.6575	71.0534	68.7059	61.7802	69.8875	72.2885
ENSOART00000001176.1	1.40327	0	0.38569	0.586322	0.307462	0	0	0.117922	0	0	7.93943	9.27374	9.48078	9.94537	12.9715	2.92091	2.56584	1.67998	1.53761	2.52401
ENSOART00000001177.1	2.71692	0	0.404802	0.830446	1.5838	4.62099	0.341223	0	0.800603	0.417149	75.5417	78.1655	76.4311	46.5031	60.1914	149.099	151.84	211.856	207.096	135.384
ENSOART00000001191.1	14.7672	8.36734	4.0097	6.01876	6.53042	11.2057	11.1542	5.49262	8.36709	8.80231	1.53203	1.11418	1.46829	2.33002	2.05151	5.38672	9.97211	3.40891	10.0347	14.5382
ENSOART00000001179.1	0	0	0	0	0	0.19133	0.0392701	0	0	0	1.48783	3.54369	1.50951	1.2243	2.00563	5.20458	5.46438	3.53803	4.7106	5.16256
ENSOART00000001180.1	0	0	0	0	0	0	0	0	0	0	0	0	0	0	0	0	0	0	0	0
ENSOART00000001181.1	0	0.133042	0.141125	0.143015	0.452423	0.267248	0.118452	0.172097	0.138933	0.427755	0.224664	0	0.0953181	0	0	0	0.133273	0	0.472522	0
ENSOART00000001184.1	13.4591	9.70542	11.4002	10.9944	13.5192	14.7379	12.5161	15.0332	13.8987	14.8967	11.7342	6.98492	8.66943	12.0682	11.9981	21.2726	18.7664	23.2429	18.2074	25.7551
ENSOART00000001183.1	10.2287	9.26796	8.39765	9.55598	13.7187	17.6373	17.8385	14.4279	20.4028	17.5722	12.645	9.74791	9.80688	6.78417	13.7856	12.0737	11.1042	11.3897	10.7595	13.6637
ENSOART00000001187.1	2.44798	1.6978	1.36266	1.62044	1.52534	3.79794	3.59031	2.69521	3.10603	3.01027	1.49378	1.4777	1.06911	1.6557	1.27841	3.61453	5.56813	3.62789	4.67422	5.11652
ENSOART00000001185.1	0.487376	0.226219	0.540804	1.13329	3.13105	3.89554	4.88085	2.92194	8.84122	6.6443	0.555965	0.586653	0.623195	0.825453	1.09377	1.69428	1.70974	1.01103	1.93298	2.57404
ENSOART00000001186.1	5.56891	3.01426	6.93041	8.93066	15.5386	29.7876	30.7984	56.0112	36.1004	50.5207	117.278	55.7519	75.9116	106.324	122.9	149.272	77.0107	155.752	90.6101	69.5023
ENSOART00000001188.1	148.792	119.511	81.4391	94.8694	95.7341	103.386	111.033	149.588	123.701	137.162	94.3717	74.2326	53.9705	65.5592	76.6749	136.843	142.564	107.343	181.861	156.811
ENSOART00000001208.1	0.0151244	0	0	0	0.0043272	0.535705	0.0615757	0.0389697	0.00516273	0	2.30551	3.4799	2.83645	2.15698	2.8275	4.97897	8.69574	7.71556	9.5249	5.79889
ENSOART00000001190.1	0.0410092	0	0	0	0	7.39264	5.81484	3.31298	4.81396	4.03631	0	0.0780173	0.0383273	0.260289	0	11.7755	1.63332	14.8809	1.62975	15.0401
ENSOART00000001197.1	66.626	52.2841	35.4686	43.4878	45.0138	62.5207	76.9477	75.0664	71.6673	70.2569	42.4558	31.1851	35.1974	42.0763	34.3391	78.2014	74.4085	86.1284	75.1585	79.9718
ENSOART00000001192.1	0	0	0	0	0	0	0	0	0	0	0.00873793	0	0.00702823	0	0	0	0.00332151	0	0	0
ENSOART00000001195.1	1.1778	1.85898	3.60864	2.50934	6.37963	1.49636	2.44143	1.75494	4.81089	3.10317	3.45412	2.76146	3.93097	4.21062	4.34945	6.04462	6.23023	4.60505	6.07977	6.88578
ENSOART00000001193.1	0.0509639	0.0998787	0	0.0268057	0.0432041	0.0992272	0.177125	0.163079	0.129548	0.079848	0.148705	0.176607	0.189163	0.0468575	0.123467	0.153012	0.162531	0.119566	0.0872827	0.163232
ENSOART00000001194.1	28.5803	29.932	22.76	25.7702	24.7879	29.9214	35.9626	35.0623	37.7284	34.7261	16.7862	12.2555	13.018	13.1901	14.4945	24.4137	31.6652	20.9379	32.1939	37.0335
ENSOART00000001196.1	0.145598	0.0475246	0	0.0508283	0.162358	0.0471908	0	0.0616252	0	0.0503735	0	0.10037	0.0655849	0.222943	0	0	0.0774309	0.0910635	0	0.102215
ENSOART00000001210.1	19.0666	13.7548	10.5349	13.265	20.0023	24.6879	26.7583	21.8734	29.5849	24.6478	13.0023	12.2198	13.4312	16.9639	17.8659	39.8701	45.1526	42.9031	39.2024	52.5414
ENSOART00000001198.1	0	0	0	0	0	0	0.015893	0	0.0186185	0.0191204	0	0.0126813	0.0123248	0.0167979	0	0.0878311	0.139788	0.257158	0.0938503	0.117519
ENSOART00000001199.1	29.2106	20.3352	15.6194	15.2506	15.9489	21.2964	19.6435	22.8087	18.6636	20.1738	9.58395	8.76123	9.12189	9.6752	10.7155	13.2331	17.1007	13.8408	16.9675	20.2372
ENSOART00000001200.1	363.501	284.662	185.075	166.772	214.69	283.434	192.955	202.389	218.869	217.365	70.7894	75.1652	110.108	91.9579	102.151	99.6471	94.335	84.2569	112.944	95.3814
ENSOART00000001201.1	0	0	0	0	0	0	0.0885219	0	0.0344755	0.0354395	0.0282619	0	0.0688822	0	0	0.204001	0.119339	0.159586	0.145643	0
ENSOART00000001203.1	0	0	0	0	0	0	0.0577504	0	0	0	0	0	0	0	0	0	0.010616	0	0.0570012	0.0707289
ENSOART00000001205.1	7.31277	3.80884	5.47935	5.14832	13.3879	5.30517	5.47861	3.72366	12.7695	10.8742	4.25817	2.67488	4.17871	5.66449	6.8945	13.7705	10.3609	10.6703	8.02056	9.72343
ENSOART00000001207.1	50.3796	38.4926	23.1647	26.9021	26.1469	33.7094	42.5097	39.9121	34.6015	39.2118	21.0261	17.6702	20.9446	23.7644	19.185	45.9647	52.3765	37.4057	48.3315	49.828
ENSOART00000001204.1	0	0.0139639	0.0302035	0.0150135	0.0243133	0.0138761	0.0124029	0.0182954	0	0	0	0.0296948	0.00960995	0	0	0.256978	0.0681232	0.120328	0.0121974	0.0612426
ENSOART00000001209.1	0	0.0103973	0	0	0.0272106	0	0	0	0	0	0.195653	0.206512	0.293305	0.16582	0.194679	0.0893237	0.43951	0.437982	0.490359	0.456945
ENSOART00000001206.1	3.96903	4.24513	3.41191	3.49676	3.035	7.1753	10.1365	7.37012	11.5021	6.54528	7.94312	9.23762	7.05841	7.93765	8.66388	59.8489	54.3863	93.1755	37.0124	56.4133
ENSOART00000001211.1	0.0780224	0.254958	0.078295	0.0521937	0.0656555	0.59154	0.350107	0.538434	0.607827	0.401453	0.123238	0.0933662	0.178699	0.0710682	0.0679659	0.157157	0.152416	0.022959	0.331657	0.229079
ENSOART00000001212.1	0.494633	0.992069	0.883405	1.41091	1.08622	0.602492	0.783622	0.621525	0.574356	0.495317	0.273362	0.633278	0.288213	0.196482	0.478036	1.60978	1.70977	0.865368	2.06989	3.31722
ENSOART00000001213.1	0	0	0	0	0	0	0.144117	0	0	0	0.546215	0.172149	0.455254	0.230864	0.0818228	0	0.161067	0.0787278	0.143867	0.173515
ENSOART00000001214.1	0	0	0	0	0	0.185014	0.626398	0	0.0474908	0.0791669	0	0.0262824	0	0.0349613	0	0	0.0121329	0	0	0
ENSOART00000001218.1	4034.6	5849.76	7918.89	7479.42	6912.49	4520.29	4527.52	4586.83	4486	4594.9	2193.48	2018.86	1653.45	1915.09	1682.46	3039.33	3359.45	2946.53	3119.07	3148.54
ENSOART00000001215.1	0	0	0	0	0	0	0	0	0	0	0	0	0	0	0	0	0.0787527	0.0463029	0	0
ENSOART00000001229.1	9.26772	2.7422	0.988293	1.78454	1.56332	3.14144	1.05835	1.40943	1.27677	1.52954	11.4138	7.80169	13.5781	35.1831	22.6587	10.1288	13.4773	14.6271	7.11253	14.7402
ENSOART00000001219.1	14.1199	8.31473	6.1139	8.56302	11.6003	8.96423	13.2052	6.98415	11.4135	10.1398	5.70971	4.88662	4.7228	5.13162	6.13922	10.6047	13.2693	11.1604	13.6436	15.2322
ENSOART00000001216.1	1.32201	1.06879	0.754358	0.936191	0.976178	0.816339	1.11905	1.01931	1.11568	0.883969	3.68577	4.79189	1.93631	3.83334	3.78064	35.5748	45.6947	44.7035	23.0458	33.4937
ENSOART00000001217.1	0.063917	0.0616014	0	0	0.0558881	0	0	0.0767384	0.127948	0	0	0.176369	0	0	0.0653257	0	0.0822899	0	0	0
ENSOART00000001222.1	5.68929	2.40194	1.77343	4.00477	3.19046	3.64242	2.8919	2.24702	2.72369	2.83708	3.16046	4.12111	3.66719	4.41688	4.51628	12.2857	21.7058	11.7174	22.097	30.5053
ENSOART00000001220.1	0	0	0.118049	0	0	2.81312	2.09326	2.3246	4.28852	2.98628	2.96789	1.26849	0.633725	1.27646	0	2.66463	1.52508	1.08821	2.60442	0
ENSOART00000001221.1	3.41681	1.54915	1.54818	1.91643	3.01798	2.11371	3.53088	0.631738	2.41729	2.15776	3.5504	1.36405	1.7072	3.15514	3.67345	4.3029	2.2483	3.62148	2.8054	2.08218
ENSOART00000001224.1	0	0.0123395	0	0	0	0	0.0109734	0	0.0128783	0	0.042284	0.0219013	0.0127315	0.0347267	0.0121478	0.0227253	0.0401131	0.00590617	0.0377128	0.0679531
ENSOART00000001223.1	425.893	349.41	257.543	284.936	284.288	590.293	506.211	544.603	522.309	522.298	143.545	103.244	98.7382	140.274	108.537	236.645	268.517	238.452	301.497	229.743
ENSOART00000001225.1	98.6047	79.9385	73.7461	83.9546	110.878	110.016	136.72	128.009	156.914	123.122	97.6711	89.7257	96.3471	94.2782	97.7607	177.018	169.693	193.761	182.138	127.159
ENSOART00000001230.1	8.81617	6.84026	3.51701	5.47327	4.05291	4.29009	4.23789	5.3701	5.64717	4.38246	6.37727	6.41136	6.60897	7.77826	7.37368	9.16126	9.35992	15.2405	9.42388	9.07399
ENSOART00000001226.1	0.0450311	0.0544405	0.0453148	0.0454561	0	0.00159394	0	0.110325	0.169595	0	0	0.328233	0	0	0.331707	0.0544002	0.0576651	0	0	0
ENSOART00000001227.1	7.10499	7.62208	8.02212	8.56655	10.5239	10.966	15.1257	12.5954	15.0015	11.9033	9.2734	9.07622	9.69583	7.72469	9.87874	14.2061	17.8591	15.8092	14.5123	12.1317
ENSOART00000001233.1	0	0.0427166	0	0.0457108	0	0.2545	0	0.0554698	0	0.0453203	3.32218	3.4312	3.35765	3.20707	4.53785	25.7593	47.795	20.9497	42.3945	53.2394
ENSOART00000001231.1	0	0	0	0	0	0	0	0	0	0	0.0532812	0.0665064	0.0432509	0.0294523	0.217594	0	0.286137	0	0.301795	0.545156
ENSOART00000001239.1	1.33019	1.46249	0.856617	1.62646	1.72459	1.05079	1.13296	1.47763	1.92637	2.51696	3.01804	4.17118	4.08606	2.57716	3.7974	3.9417	4.83889	6.7074	5.29032	5.19123
ENSOART00000001234.1	3.55058	3.8037	2.61794	2.86894	4.68611	5.18645	3.2675	4.10169	4.81464	3.77886	9.03543	8.02128	7.50813	8.65619	9.25342	17.7623	26.101	24.0048	22.6802	33.8191
ENSOART00000001232.1	0	0	0.0135763	0.0134905	0	22.2631	25.862	20.5401	26.7725	19.0419	0.0428869	0.0266849	0.043163	0.117691	0.0989522	16.3701	13.4581	29.0646	11.301	11.6006
ENSOART00000001235.1	0	0	0	0	0	0	0	0	0	0.0295169	0	0	0	0.0260019	0	0	0.0586511	0	0	0
ENSOART00000001236.1	0.545468	0.205489	0.0877444	0.263912	0.281698	0.65291	0.29071	0.480636	0.339268	0.174486	13.9037	16.2217	7.08277	21.5983	16.8451	75.5106	85.8068	88.3057	67.8732	81.8638
ENSOART00000001240.1	53.4169	44.5269	27.855	36.4527	47.5371	45.0791	73.4201	61.1103	88.2784	63.9514	32.2879	17.7456	26.2362	24.24	25.389	39.9095	20.7164	34.9265	20.2359	22.0973
ENSOART00000001247.1	7.8557	4.12152	1.50745	2.32254	2.98444	12.2624	17.1704	19.5245	15.1656	14.5052	3.67479	4.63056	4.74815	3.30102	4.06203	6.28955	8.55624	13.4019	6.76081	7.05531
ENSOART00000001242.1	0.0895148	0.043864	0.0472595	0.117773	0	0.414017	0.136194	0.0573439	0	0.140381	2.70859	3.74071	5.05901	7.4286	5.80849	7.23265	5.90907	7.09889	5.53831	6.51096
ENSOART00000001237.1	0	0	0	0	0	0.0751053	0	0	0	0	0.0631431	0	0.0524361	0.071016	0	0.0923767	0.148438	0	0.464511	0
ENSOART00000001238.1	0	0	0	0	0	0.524318	0.987728	0.851634	0.810808	0.279277	0.774255	0.833186	0.18262	0.867321	0.394694	3.46564	4.94369	132.639	5.72183	17.7122
ENSOART00000001244.1	0.0600028	0.0588116	0	0	0.0680471	0.0194782	0.0521916	0	0.0815014	0.0627783	0.518051	0.666261	0.404892	0.478217	0.50341	64.0863	28.8608	51.7548	41.8432	28.1524
ENSOART00000001246.1	4.77495	3.21743	1.57589	0.86239	1.27251	8.62938	2.80689	3.21121	1.70098	0.9065	13.5593	12.9028	5.39609	20.4709	4.87431	95.7032	58.1701	95.7992	63.3182	13.5951
ENSOART00000001241.1	11.2643	7.04535	3.29476	5.35349	5.63827	11.0977	11.4032	11.4437	11.7749	8.8196	4.78747	3.79923	3.44108	3.57044	4.4159	8.13412	8.09492	17.0923	8.76724	12.2463
ENSOART00000001245.1	0.487984	0.782136	0.231668	0.511366	0.260278	0.949216	0.806516	0.451299	0.62732	0.322641	1.54235	1.43876	1.49808	0.774643	0.906004	1.75381	1.59943	1.54003	1.55768	1.96677
ENSOART00000001248.1	23.5489	17.1899	13.6362	16.6481	22.2788	22.7813	25.0333	19.8094	27.5861	27.1384	14.3477	11.6648	13.9771	16.5429	16.2088	17.1155	21.3611	15.7367	23.1448	23.9249
ENSOART00000001243.1	0.03933	0	0.0823556	0	0.0330585	42.6901	49.9481	32.0206	43.0866	29.0068	0	0.0543336	0	0	2.21589	31.8642	26.9425	18.3676	24.8527	15.4375
ENSOART00000001279.1	0.114528	0.0641932	0.00435961	0.0129588	0.0140513	2.23312	0.578196	2.46689	1.24445	0.993401	1.97789	1.38778	2.45026	2.75496	2.05281	2.05455	3.80918	1.08686	4.09164	4.72526
ENSOART00000001249.1	5.63225	2.75889	4.10805	3.72367	10.6224	4.30247	6.46616	2.55415	9.00438	5.96904	4.03123	3.16498	5.15011	4.20327	6.46154	12.9374	10.2178	10.3141	8.71222	9.47709
ENSOART00000001250.1	1.44774	2.15374	1.22227	1.70746	1.5497	1.80144	2.18863	1.94471	2.03081	1.4975	1.79727	1.76556	1.59666	1.63598	1.66667	2.19345	2.81222	3.03662	2.28241	3.22976
ENSOART00000001252.1	0	0	0	0	0	0	0	0.17396	0	0	0.368005	0.701242	0.126216	2.33682	0.822963	6.59383	1.70452	0.416351	6.97775	5.65876
ENSOART00000001251.1	65.43	60.7846	30.3609	38.5702	55.3265	59.3997	83.1923	69.7472	87.939	91.9369	0.501804	1.24441	0.220823	0.485279	0.154447	1.19275	2.37133	0.997889	3.92002	2.04379
ENSOART00000001253.1	50.8571	38.7692	23.3288	28.7771	37.1839	46.0795	64.4368	56.0079	57.5652	59.3378	1.5227	0.625773	0.522722	1.35998	1.30223	3.5308	3.36665	2.55037	2.57838	2.92008
ENSOART00000001257.1	107.659	72.2666	51.3282	54.0537	72.4753	99.5445	133.731	125.708	106.375	123.852	12.0188	6.97198	6.83053	8.75073	8.45194	22.7952	27.6007	16.4334	24.0349	28.1601
ENSOART00000001254.1	1.56403	1.40877	1.12403	1.22846	1.122	1.92486	2.59365	1.8164	1.99229	1.18885	3.91287	4.72929	4.2528	3.66885	4.10147	4.99737	6.3171	5.66955	4.34354	6.7537
ENSOART00000001259.1	0	0	0	0	0	0	0	0	0	0	0	0	0	0	0	0	0	0	0	0.0963512
ENSOART00000001258.1	0	0	0	0	0	0	0	0	0	0	0.503775	0.173022	0	0.329001	0	1.09721	0	0.818736	0	0
ENSOART00000001260.1	0	0	0	0	0	0	0	0	0	0	0	0	0	0	0	0	0	0	0	0
ENSOART00000001261.1	1.78335	1.84264	0.470949	0.545329	0.938737	7.85416	3.45424	4.44053	2.5304	1.0623	25.6655	5.12622	11.0276	27.1486	71.5897	129.424	21.8188	143.677	50.2596	239.204
ENSOART00000001262.1	25.3722	22.7805	12.6068	22.5558	17.9964	8.5392	23.4451	24.555	39.493	37.4119	6.511	5.79979	11.9939	12.6361	9.53793	13.4672	14.3824	16.0013	13.8373	11.8295
ENSOART00000001263.1	0	0	0	0	0	0.101516	0.0522336	0.0951265	0.164691	0.0924196	0.0974611	0.342347	0.12704	0.200274	0.267054	1.87226	1.95882	2.09782	0.833234	2.62905
ENSOART00000001264.1	0.127756	0.12523	0	0.057673	0.0310796	0	0	0	0	0	0.01526	0.114042	0.0738908	0.0503541	0.0883098	0.131643	0.337553	0.222695	0.421993	0.117427
ENSOART00000001281.1	15.4859	15.3854	8.87492	12.1859	12.043	13.1268	14.7758	12.717	13.8448	13.7714	8.95364	8.09433	8.39014	8.4207	8.78395	11.2054	11.4773	15.8049	10.9625	14.5727
ENSOART00000001269.1	0.107298	0.114962	0.0418499	0.0623879	0.0755668	0.119276	0.119954	0.0947161	0.100122	0.0822741	0.21052	0.254589	0.216445	0.241314	0.259574	0.400351	0.464059	0.563516	0.584109	0.616835
ENSOART00000001282.1	22.6754	22.9638	15.9763	20.6762	23.9617	17.471	23.1249	19.5364	23.2878	19.3635	10.5029	11.2713	9.16714	9.42555	9.4282	11.2803	7.88521	10.3577	8.07511	9.37228
ENSOART00000001284.1	32.364	36.1702	20.6386	25.0461	30.2664	18.1451	22.5694	22.4388	19.7729	18.2975	14.6256	14.7872	11.083	12.2014	10.3366	8.63955	8.23544	11.2167	8.26276	9.84461
ENSOART00000001266.1	0	0	0	0	0	0	0	0	0	0	0	0.0386158	0.0564368	0	0.0270246	0.133859	0.115569	0.0784719	0.119347	0
ENSOART00000001265.1	0.725233	0.491548	0.548467	0.467997	0.602733	0.20569	0.225432	0.141476	0.0295626	0.0890795	0.554027	0.744827	0.27348	0.165029	0.482172	0.50871	0.982767	0.332077	0.194308	1.15231
ENSOART00000001268.1	0	0	0	0	0	0.0124157	0.0111091	0.0164023	0	0.00669104	0	0	0	0	0	0.00766878	0.00406096	0.0119585	0.0218169	0.0137582
ENSOART00000001267.1	9.22898	8.00155	4.1774	4.90092	5.4773	4.81204	4.82134	3.26764	4.70423	5.278	7.1579	7.18293	5.73607	8.72974	8.40553	64.1652	37.0631	81.3115	40.1595	33.3461
ENSOART00000001271.1	0.0528846	0.181367	0.0835884	0.139056	0.179225	0.05148	0.206736	0.135339	0.322525	0.082833	0.176284	0.842812	0.0535351	0.170176	0.538204	0.0635027	0.320451	0.248139	0.0679287	0.338571
ENSOART00000001270.1	0.161167	0.489786	0.802391	0.441554	0.700756	0.596585	0.589236	0.60001	0.657624	0.472702	1.45662	1.81365	0.652475	0.859736	1.38753	1.60859	1.67537	1.83048	1.4354	1.93817
ENSOART00000001275.1	0.480436	0.739568	0.396219	0.576551	0.636628	1.56938	1.78608	2.23411	4.69507	3.03887	1.88164	1.09171	1.57522	1.19872	1.23237	4.40426	3.13041	4.63692	3.43834	4.51793
ENSOART00000001294.1	0.0792457	0.165815	0.219471	0.0892479	0.136016	0.159654	0.207396	0.115696	0.124422	0.0610768	0.128781	0.217093	0.206712	0.174992	0.193801	0.127253	0.341927	0.262894	0.484133	0.616722
ENSOART00000001289.1	0.0386921	0.0284567	0.0102804	0.0102049	0.0662331	0.113122	0.370969	0.211538	0.217573	0.091373	0.300298	0.228816	0.189255	0.160176	0.224297	0.151353	0.268325	0.372323	0.339648	0.396239
ENSOART00000001273.1	0	0	0	0	0	0	0	0	0	0	0	0	0	0	0	0	0.0130993	0	0	0
ENSOART00000001272.1	1694.46	2275.1	2646.22	2396.41	2180.43	1662.53	1473.43	1666.22	1517.73	1692.71	640.467	600.826	537.234	594.316	540.101	924.701	1116.29	903.964	1127.13	1155.84
ENSOART00000001277.1	2.60707	2.61558	1.64345	1.87996	1.86364	2.91042	4.31016	2.99616	3.40268	2.66943	2.83809	2.8013	2.41779	2.48644	2.84741	3.12488	4.84097	4.73798	3.60963	5.8175
ENSOART00000001283.1	0.466638	0.229255	0.187888	0.303251	0.385337	0.746379	1.64114	1.07789	1.35947	1.02681	0.0602381	0.0288557	0.0283602	0.0535118	0.0930725	0.0814914	0.150784	0.194458	0.0971728	0.325947
ENSOART00000001274.1	560.438	608.354	429.969	470.633	445.699	628.796	528.942	541.476	633.148	554.472	362.766	289.13	288.944	336.267	326.73	1013.13	1354.9	751.842	1337.25	1310.18
ENSOART00000001276.1	24.6144	19.8812	17.9445	24.4829	41.5369	42.6306	51.1676	47.7806	81.9883	76.8057	17.0269	11.5724	19.7207	21.5521	23.3959	43.2367	32.0672	46.1386	27.4317	30.1718
ENSOART00000001287.1	10.7321	4.79961	2.61058	4.40947	4.85786	18.2133	10.4247	18.3164	10.4911	10.1231	8.97961	4.63668	5.38993	7.23668	4.62902	10.9689	7.91613	9.73346	9.59393	10.2115
ENSOART00000001288.1	0	0	0	0	0	0	0	0	0	0	1.6615e-10	0	0	0	0	0	0	0	0	0
ENSOART00000001278.1	9.0551	9.48259	8.83108	9.94	11.1502	4.28852	5.31286	11.5612	8.49222	7.12376	4.03683	2.73234	3.0672	3.40219	1.89376	6.89216	7.29384	4.31853	7.20513	5.73811
ENSOART00000001280.1	0.051099	0	0.158966	0	0.0858955	0.0491911	0.0442422	0.0650016	0.102646	0	0.0856568	0	0	0	0	0.0621186	0.0163565	0	0.0446231	0.110065
ENSOART00000001285.1	0	0	0	0	0	0	0	0	0	0	0	0	0	0	0	0	0	0	0	0
ENSOART00000001286.1	39.2303	39.5509	33.3502	30.2308	26.8825	38.4482	40.3106	30.4413	35.267	32.5211	25.1687	24.7559	26.0285	27.9527	22.836	35.7295	36.9047	44.8023	38.4919	41.0621
ENSOART00000001292.1	0.0139848	0.027422	0.0148301	0	0	0	0	0	0	0	0.0117133	0.0777562	0.0283073	0.0385899	0.0270452	0.437373	3.54064	0.892674	0.407198	0.360854
ENSOART00000001293.1	21.8816	15.0544	11.8771	15.9349	14.9646	19.6775	24.2382	16.8765	22.5669	21.1408	9.88654	9.62795	9.46063	9.70836	10.6132	17.8117	24.5837	18.8275	23.499	29.8175
ENSOART00000001290.1	0	0	0	0	0	0	0	0	0	0	0	0	0	0.126181	0	0	0.0109455	0	0	0
ENSOART00000001291.1	0	0	0	0	0	0	0	0	0	0	0.296987	0.21926	0.35974	0.272368	0.210246	0.474635	0.919285	1.66789	0.845437	0.592317
ENSOART00000001295.1	60.1221	40.8083	29.4139	36.6411	28.9617	39.5148	41.6299	33.6553	32.3273	37.3416	21.8939	19.3837	19.1758	24.0347	17.8813	38.6312	46.3529	43.0539	45.8009	50.4921
ENSOART00000001296.1	28.7437	19.3091	13.5897	17.9761	19.8237	21.2756	25.8408	22.9815	25.917	27.5064	11.4741	9.97532	10.783	11.6365	11.4779	21.21	23.1692	19.9999	26.2917	26.5332
ENSOART00000001298.1	69.73	64.7468	49.5299	49.3327	56.9527	59.4688	64.4583	64.1234	62.0466	69.2767	51.6294	46.1834	43.3184	40.6558	49.4871	59.0923	68.3658	70.1338	67.5798	75.3324
ENSOART00000001297.1	0.744285	0.968356	0.498243	0.453175	0.750553	0.604768	0.947314	0.623887	0.634285	0.622157	1.12366	1.20704	0.814951	1.17718	1.04569	1.00454	1.58422	1.42737	1.91139	1.52461
ENSOART00000001304.1	1.73534	2.73555	2.94353	3.12204	3.66785	3.69708	4.52366	2.7043	4.14312	3.02125	3.69062	3.24233	3.41145	3.58417	4.75216	4.25888	5.14921	3.91789	3.79039	5.74723
ENSOART00000001299.1	0	0	0	0.0335268	0.0808365	0	0.0830669	0.0407583	0.0323648	0.0332631	0.106127	0.198701	0.258432	0	0.0619112	0.191408	0.183184	0.0898181	0.136613	0.135736
ENSOART00000001301.1	0	0	0	0	0	0	0	0	0	0	0	0	0	0	0	0	0.0515223	0.216546	0	0
ENSOART00000001300.1	0	0	0	0	0	0	0	0	0	0	0	0.0152576	0	0	0	0.0528577	0.014029	0.0206437	0.0565082	0.094134
ENSOART00000001307.1	0	0	0	0	0	0	0	0	0	0	0	0.0311716	0.0131422	0.164537	0.0431067	0.10165	0.166249	0.181881	0.114848	0.0646281
ENSOART00000001308.1	0	0	0	0	0	0	0	0.0147977	0.0117601	0.0241474	0.0868514	0.0568754	0	0.100158	0.0792602	0	0.112668	0.0666343	0.121722	0.455898
ENSOART00000001305.1	1.86385	0.447068	1.35492	1.19715	1.95202	1.88714	0.527493	1.64846	1.38595	1.38542	2.4612	1.81349	2.49084	3.32133	2.0689	3.37444	3.45788	3.3905	2.96389	2.74
ENSOART00000001302.1	0	0	0	0	0	0.532999	0.28349	0.210043	0.331559	0	0	0	0.0739402	0	0.0532554	0.857266	0.892683	1.2317	0.658146	0
ENSOART00000001303.1	0.0251584	0.0246675	0.0266983	0.0265276	0.021495	0.163433	0.0438313	0.0323339	0.0148131	0.0791462	4.30191	4.24217	2.59014	5.67926	4.37414	42.6092	54.9624	28.1051	43.8423	51.2399
ENSOART00000001306.1	0	0	0	0	0	0	0	0	0	0	0	0	0	0	0	0	0	0	0	0
ENSOART00000001310.1	0	0	0	0	0	0.475517	0	0	0	0	0.482767	0.577455	0.131231	0.83518	0.624142	1.46345	3.04758	2.80691	1.84111	1.77404
ENSOART00000001309.1	0	0.154577	0	0.0570725	0.103826	0	0	0	0	0	0	0.0896662	0	0.0754586	0.260082	0	0	0	0.0592563	0
ENSOART00000001311.1	0.109912	0.456398	0.144694	0.103357	0.1521	0.0267462	0	0	0	0	0.457778	0.480117	0.296708	0.235771	0	0.13196	0.140213	0.0773551	0.13901	0.175805
ENSOART00000001314.1	0	0	0	0	0	0	0	0	0	0	0.143751	0.0795881	0	0.0351476	0.22195	0.344549	0.255937	0.789179	0.392749	0.204812
ENSOART00000001312.1	53.2875	35.3311	21.8883	27.9183	27.4606	56.0528	54.9702	48.8703	53.341	69.4049	26.0045	17.4767	23.0799	20.437	22.8929	52.3075	53.1579	41.1028	50.3744	57.0954
ENSOART00000001317.1	41.002	66.8432	69.582	82.4326	87.1063	117.323	123.928	135.643	136.664	163.61	32.5803	46.2155	28.908	41.9808	26.862	134.486	136.012	171.644	127.466	110.088
ENSOART00000001313.1	0.215599	0.0384399	0.208292	0.067169	0.0587098	0.693992	0.0768737	0.151274	0.75991	0.102854	5.29454	5.26987	3.64379	8.01328	5.24158	418.208	180.759	309.231	170.504	159.801
ENSOART00000001315.1	0	0	0	0	0	0.88571	1.23072	1.78759	1.55573	0.267932	0.105121	1.60705	1.70747	0	1.41679	0.468326	1.22272	1.71972	1.24321	1.87055
ENSOART00000001316.1	0	0	0	0	0.520848	0	0	0	0	0	0.497358	0.451101	0	0	0	1.59474	0	0.630888	0	0
ENSOART00000001318.1	0.0396245	0.0932636	0.0421504	0.0250899	0.0543212	2.51679	3.01851	2.0331	2.67571	1.96954	0.246204	0.259252	0.147335	0.131237	0.456288	1.78262	1.53419	4.78065	1.36305	2.65998
ENSOART00000001319.1	0	0	0	0	0	0	0	0	0	0	0.00609199	0.0867167	0.110011	0	0.0892132	1.02202	0.750766	0.875564	0.277573	0
ENSOART00000001320.1	0.24157	0.368623	0.624447	0.482583	0.25821	0.28311	0.155155	0.308544	0.230868	0.106349	0.500982	0.61644	0.312536	0.185193	0.450556	0.376205	0.351739	0.405998	0.308922	0.407432
ENSOART00000001322.1	0.50982	0.731763	0.732136	0.537016	0.728665	0.620697	0.728788	0.397105	0.723852	0.457453	0.441504	0.619438	0.442298	0.334903	0.422884	0.503444	0.476105	0.717779	0.405406	0.468613
ENSOART00000001326.1	24.0083	21.4962	15.7472	17.9742	22.0772	23.7026	27.8369	25.3163	30.5896	28.5437	10.3252	8.80887	8.92582	9.88746	9.39662	17.5685	19.2343	14.0939	18.4615	20.3493
ENSOART00000001321.1	1.92041	2.36648	1.54598	4.31009	1.70968	0.415681	0.552317	0.989632	0.285476	0.957426	0.875804	0.537732	1.11102	0.851055	0.904651	1.53291	2.34822	3.01252	1.10064	2.22476
ENSOART00000001344.1	5.35435	4.59929	2.12826	3.08076	3.35575	4.00466	4.31358	3.78751	3.9288	3.92102	3.23355	1.97705	1.53554	2.15071	3.43344	3.07307	5.8371	5.08039	4.54561	9.87475
ENSOART00000001331.1	0.0930027	0.0492099	0.204034	0.106342	0.332557	0	0	0.0452159	0.0254193	0.0565496	0.349074	0.142557	0.309216	0.242643	0.283206	0.0901185	0.245598	0.0848651	0.106328	0.129566
ENSOART00000001333.1	0.0843886	0.516496	0.296016	0.245834	0.414397	0.0326148	0.0145874	0.0793492	0.102841	0.187715	0.213388	0.321229	0.194741	0.213289	0.169435	0	0.169331	0.0196841	0.237098	0.331848
ENSOART00000001325.1	43.8639	47.6169	32.1971	40.2885	40.1165	38.3372	34.8288	34.2622	38.2188	40.0847	27.084	21.6508	23.4684	23.2915	24.6382	36.8622	39.0705	39.0145	38.4632	43.9791
ENSOART00000001323.1	5.79556	5.41939	4.27646	6.11402	4.58742	8.9053	10.3229	7.86578	9.81683	8.88615	5.86643	4.34997	4.00179	4.9346	5.19661	4.54795	10.9472	10.7408	11.1861	11.9446
ENSOART00000001327.1	34.5627	24.881	11.7272	18.8634	20.5344	41.6107	38.4088	42.2865	46.3428	38.1634	18.663	16.8237	24.0136	18.1705	25.6748	20.6148	25.5723	33.6137	20.611	29.616
ENSOART00000001332.1	0	0	0	0	0	0	0	0	0	0	0	0	0	0	0	0	0	0.102087	0	0
ENSOART00000001335.1	0.901817	0.382096	0.141885	0.199624	0.285622	0.564155	1.06714	1.34566	0.864658	0.922739	0.317426	0.518798	0.202813	0.286769	0.355072	0.75027	0.965584	0.639549	0.915342	0.911316
ENSOART00000001329.1	0	0	0	0	0	0	0	0	0	0	0	0	0.0292874	0	0	0.103916	0.166031	0.122063	0.0371421	0.183211
ENSOART00000001352.1	12.9787	11.14	7.67061	10.6707	10.8491	10.8701	14.6	10.1113	13.9688	11.9451	7.74722	7.94039	8.04261	7.91965	9.08889	9.7565	14.0421	13.0612	12.5161	15.6162
ENSOART00000001328.1	0	0	0	0	0	0	0	0	0	0	0.999061	2.69655	0.249732	3.45694	2.11403	12.1363	11.8226	7.43025	5.6092	6.53051
ENSOART00000001330.1	10.979	3.96919	6.4631	6.12395	9.5983	8.43264	8.1194	8.26738	13.5437	11.9232	7.75305	4.27831	6.86639	7.16595	8.04358	18.1808	15.7229	16.9466	15.1137	12.6261
ENSOART00000001334.1	0.166929	0.0817518	0	0.0437494	0	0.365318	0.0722877	0	0	0.0433885	1.41755	1.29655	1.12711	0.690483	1.74429	2.75017	4.04682	2.27109	4.03822	3.70548
ENSOART00000001336.1	0.169326	0.0663497	0	0.0355631	0.0856933	0.0659052	0.117515	0.086471	0.137304	0.211714	0.196977	0.0936919	0.0685797	0.0311304	0.0328694	0.0406221	0.0648081	0.158886	0.0580015	0.0719305
ENSOART00000001339.1	0.130851	0.0549689	0	0	0.0159119	0.946716	0.243956	0.383644	0.247671	0.117393	0.171895	0.103815	0.075681	0.103146	0.0904563	2.83129	3.33809	0.649169	5.02648	6.41275
ENSOART00000001337.1	1.39902	1.26041	0.779486	0.689147	0.749352	0.751214	0.822881	0.684539	0.753064	0.475715	1.73832	1.30131	1.16723	1.96521	1.94398	2.56173	2.28534	3.34384	2.35609	3.89746
ENSOART00000001338.1	0	0	0	0	0	0	0	0	0	0	0	0	0	0	0	0	0	0	0	0
ENSOART00000001354.1	0.0055486	0	0	0.00195402	0.00159059	0.012624	0.00322918	0.0143111	0.0189614	0.0038918	1.41827	3.2012	2.49653	0.988834	1.92527	5.18141	7.87774	5.68587	6.50253	5.32095
ENSOART00000001341.1	0	0	0	0	0	0	0	0	0	0	0	0	0	0	0	0.150739	0.102812	0.0504374	0.0306785	0.0384236
ENSOART00000001340.1	0	0	0	0	0	0.0309474	0.0829676	0.0611803	0.145845	0.0665607	0.0265883	0.0331041	0.0214357	0.0292192	0.03073	0	0.0050651	0	0.0408092	0
ENSOART00000001342.1	0	0	0	0	0	0	0	0	0	0	0	0	0	0	0	0	0	0	0	0
ENSOART00000001350.1	0	0	0	0	0	0	0	0	0	0	0	0	0	0	0	0	0	0	0	0
ENSOART00000001345.1	0.0917013	0	0	0	0.0788938	0	0	0	0	0.311142	0	0.204418	0.0669235	0	0.211075	0	0.0357182	0	0	0
ENSOART00000001348.1	35.4292	32.522	22.4669	25.7056	28.759	28.2752	33.101	32.3358	37.2702	35.0837	16.1798	14.9312	14.0728	14.8157	23.5702	15.7551	15.8923	21.0122	14.6002	19.3773
ENSOART00000001351.1	51.308	40.8174	26.0934	32.0405	30.0681	42.1607	42.0291	42.5941	42.7475	42.2682	15.7778	14.146	13.0572	14.7046	15.1831	25.5409	32.209	25.4959	28.4942	39.5651
ENSOART00000001349.1	7.60216	6.55931	3.13839	3.69892	4.18626	4.99023	4.64031	7.28814	5.56607	4.74546	2.64791	2.06066	2.53331	2.00305	2.02324	2.70964	2.42978	2.36456	2.08592	3.02422
ENSOART00000001343.1	49.6101	41.5713	34.1853	51.3014	51.5732	62.9722	75.2103	100.817	99.1034	94.1112	32.6485	22.5628	30.2496	25.2812	24.4911	35.687	37.4951	38.0685	38.8744	42.8429
ENSOART00000001346.1	31.266	15.6143	15.2765	19.9826	23.2369	28.7847	24.147	21.6213	32.2927	27.8142	14.5508	12.9467	13.9745	14.6501	15.9634	24.2183	26.9736	20.1966	26.8475	30.817
ENSOART00000001358.1	0.160082	0.0546086	0.0666668	0.0661177	0.029835	0.115332	0.25493	0.116496	0.121086	0.102357	1.7539	1.94793	1.4603	1.04378	1.70044	3.34379	3.44849	4.34549	3.48112	2.61534
ENSOART00000001380.1	5.10809	2.97255	2.58174	3.6533	2.64444	6.11892	7.4455	3.87985	5.58117	4.42127	3.78955	2.81619	2.95654	3.49177	2.8939	4.01526	4.40698	3.70695	7.11272	5.37274
ENSOART00000001347.1	0	0	0	0	0	0	0	0	0	0	0	0	0	0	0	0	0.0657955	0	0.0252363	0.125555
ENSOART00000001353.1	0	0	0	0	0	0	0	0	0	0	0	0	0	0	0	0	0.0360618	0	0	0
ENSOART00000001356.1	0.26356	0.0580316	0.0630205	0.0454318	0.096931	0.262171	0.253379	0.138575	0.143195	0.0960989	2.21077	2.20647	1.63287	1.6678	2.65858	3.82193	4.01456	3.11593	3.40427	3.04628
ENSOART00000001355.1	1.97989	1.61059	1.71279	2.06195	1.79995	1.87827	2.44285	1.81614	1.95862	1.81564	2.74806	2.84	2.71605	2.16276	2.52561	8.6192	17.6623	4.00369	16.8373	23.3709
ENSOART00000001357.1	0	0	0	0	0	0	0	0	0	0	0.758489	2.02391	0.509337	1.17114	1.18591	13.8218	12.5469	12.2374	9.15666	9.17354
ENSOART00000001359.1	1.22383	0.555269	0.765663	0.787151	1.30869	0.485478	0.630486	0.69682	1.36092	0.426465	10.744	11.537	13.8103	14.3792	26.5381	53.2856	42.367	102.116	47.3544	33.0118
ENSOART00000001360.1	0	0	0	0	0	0	0	0	0	0	0	0	0	0	0	0	0	0	0	0
ENSOART00000001361.1	270.932	198.431	136.992	151.059	147.536	191.47	186.395	239.964	220.924	231.47	162.792	117.616	133.25	146.078	144.858	182.48	149.521	184.301	160.794	153.304
ENSOART00000001366.1	39.3709	29.0617	14.0865	21.6409	23.0185	52.9134	47.1137	39.3726	41.9992	37.0762	11.0631	14.2667	10.303	15.0527	14.2315	31.5844	53.9929	29.0722	53.3909	64.8803
ENSOART00000001362.1	256.99	309.928	367.436	429.719	406.27	556.7	528.841	459.409	491.771	406.935	344.089	256.44	326.645	233.932	273.329	353.914	327.446	400.146	362.507	278.245
ENSOART00000001363.1	0.0742281	0	0.031472	0.0156471	0.265995	0	0.0129263	0	0.227261	0.0622274	0.0248599	0.0618938	0.0300502	0.122892	0.143573	1.58912	1.0225	0.752506	0.597535	0.925256
ENSOART00000001367.1	0.129595	0.248895	0.0391744	0.0585003	0.126087	0.162284	0	0	0	0	0.820333	0.719762	0.537175	0.803102	0.983454	0.890219	1.44022	1.00271	1.32107	1.58798
ENSOART00000001364.1	1434.66	1100.74	873.719	994.687	905.574	1236.5	1207.41	1133	1255.55	1280.04	672.381	523.765	558.554	631.558	715.951	1386.6	1653.55	1017.13	1555.44	1806.46
ENSOART00000001365.1	175.829	324.152	296.227	296.337	265.547	117.625	129.893	141.739	129.583	113.814	89.4903	73.1911	40.3748	79.1986	64.966	70.3896	87.1668	144.873	70.0954	73.3263
ENSOART00000001368.1	0	0	0	0	0	0	0	0	0	0	0	0	0	0	0	0	0	0	0	0.281725
ENSOART00000001371.1	0.160863	0.910327	0.941975	1.04778	1.0269	0.243539	0.342915	0.294307	0.226963	0.133393	4.26786	5.87187	5.29867	5.18492	4.77707	0.271808	0.586862	0.652719	0.350881	0.572297
ENSOART00000001369.1	0	0	0	0	0	2.93096	2.10204	1.35741	1.30636	1.25333	0.00815189	0.145578	0	0	0.0642217	5.95439	0.583592	12.3363	0.102371	11.7635
ENSOART00000001370.1	2.69306	2.43374	1.81204	2.00382	3.19169	1.13235	1.38997	1.08035	1.95209	1.12758	2.24908	1.23798	0.731006	1.00651	2.30481	0.590947	1.03973	1.36514	0.708777	2.59977
ENSOART00000001375.1	63.2621	50.6034	36.8744	40.5957	40.0612	66.5096	71.3511	66.4367	62.7619	69.9623	29.9249	26.5923	22.8889	25.6687	24.5187	40.4771	58.1511	42.3127	58.3178	62.5433
ENSOART00000001373.1	0	0	0	0	0	0	0	0	0	0.0144759	0.0347024	0	0	0.0254045	0	0	0.00440338	0	0	0
ENSOART00000001377.1	0	0	0	0	0	0	0	0	0	0	0	0	0	0	0	0	0	0	0	0.159011
ENSOART00000001372.1	61.2699	36.0461	19.6581	26.6513	25.5081	37.5382	34.5203	45.6677	43.4839	55.5386	27.1848	15.7007	19.333	20.0812	22.5954	28.0209	23.5	24.9986	25.5407	17.9157
ENSOART00000001379.1	0	0	0	0	0	0	0.0151092	0	0.0175532	0.118247	0	0.0967156	0.0730713	0	0	0	0.0281886	0	0.0152971	0.0367644
ENSOART00000001382.1	0.018784	0	0	0	0	0.128062	0.00127007	0.0722813	0.00163296	0	0	0.00783661	0.00315617	0	0	0	0.0557387	0	0.000825941	0.00359659
ENSOART00000001374.1	0	0	0	0	0	0.0616793	1.77497	1.15539	5.30632	2.23524	0	0.222322	0	0	0	52.8338	45.4531	62.7025	40.2688	42.4504
ENSOART00000001376.1	0.201774	0.0700346	0.0625422	0.0877759	0.0678408	0.419338	0.692252	0.412584	0.993674	0.445796	0.254186	0.422926	0.214592	0.424296	0.332476	10.6051	8.67457	12.0964	8.36692	7.46292
ENSOART00000001378.1	0	0	0	0	0	0	0	0	0	0	0	0	0	0	0	0.0125765	0.00333201	0.00981041	0.00894959	0
ENSOART00000001381.1	12.1022	8.70809	5.29573	7.19059	6.54777	9.81193	9.64378	8.89693	9.49997	9.43568	5.32978	4.01346	3.43039	4.62188	4.99069	8.26432	8.73196	10.5864	7.5966	11.2633
ENSOART00000001384.1	0	0.0726546	0.0767411	0.0774928	0	0.144601	0.192138	0.281374	0.148807	0.307386	1.94731	1.2753	1.41246	1.02549	1.30798	2.40077	4.02289	2.51704	4.47014	3.55698
ENSOART00000001383.1	0	0	0	0	0	0	0.0281516	0	0	0	0	0.0224461	0	0	0	0	0.0103481	0	0.0277819	0
ENSOART00000001385.1	0	0	0	0	0	0	0	0	0	0	0	0	0	0	0	0	0	0	0.0285006	0.0707289
ENSOART00000001386.1	0	0	0	0	0	0	0	0	0	0	0	0	0	0	0	0	0	0	0	0
ENSOART00000001392.1	0.391737	0.599098	0.282238	0.264207	0.307342	0.457934	0.422882	0.543207	0.655463	0.361153	0.157384	0.119745	0.126873	0.115296	0.181877	0.263816	0.339764	0.117667	0.38915	0.807816
ENSOART00000001387.1	3.23435	2.04793	2.49251	2.04164	2.2365	2.88234	2.83219	1.8155	1.59405	0.909706	2.2821	2.53512	2.78713	2.19604	2.72409	7.61976	10.513	4.31943	14.7643	16.1026
ENSOART00000001389.1	10.5271	13.4004	30.1277	24.2705	61.5523	17.8527	28.0753	18.7777	58.3664	38.4131	29.8611	24.8195	26.6256	35.4719	37.322	28.8862	16.6161	31.0213	13.1539	11.2702
ENSOART00000001388.1	0	0	0	0	0	0	0	0	0.00740933	0	0.012163	0.0201629	0.0097699	0.00666181	0.0139853	0.0348726	0.0230864	0.0815777	0	0
ENSOART00000001391.1	88.9648	79.228	51.2652	56.8129	56.5302	94.4963	89.3465	93.5028	93.1767	97.7328	40.8655	32.528	31.6464	41.7933	37.5451	82.3267	80.2339	87.2969	87.3779	86.1093
ENSOART00000001394.1	6.86775	5.14352	4.83077	5.36983	5.76757	2.7345	4.79954	5.16885	8.46997	6.77266	3.6768	3.79508	3.42758	3.51934	2.86136	14.1851	14.4665	21.5192	12.2635	7.56879
ENSOART00000001400.1	73.8547	45.0776	27.5025	38.0642	39.0439	71.2879	74.3312	45.7286	59.5587	62.1501	14.0946	13.1569	13.2487	15.3904	13.5562	30.952	57.0863	20.7493	59.7644	70.2592
ENSOART00000001397.1	38.4865	30.2486	26.1352	30.6284	35.7681	33.6825	42.2491	34.4397	43.9848	36.3877	22.047	21.2738	20.3567	19.0518	26.3767	39.3086	44.9146	33.2472	44.3487	56.8825
ENSOART00000001390.1	0	0	0	0	0	0	0	0	0	0	0	0	0	0	0	0	0	0	0	0
ENSOART00000001396.1	1.97627	1.5736	0.499877	0.904012	0.907753	5.57485	3.52282	6.05199	4.06382	4.59638	4.90949	2.59796	0.398678	0.699811	1.56119	6.94779	4.08603	0.699559	1.26902	3.03421
ENSOART00000001393.1	0	0	0	0	0	0	0	0	0	0	0	0	0	0	0	0	0	0	0	0
ENSOART00000001395.1	0	0	0	0	0	0	0	0	0	0	1.24528	0.766646	0.888759	0.962946	0.696649	0.610642	0.353173	0.336998	0.563808	0.254934
ENSOART00000001398.1	75.6045	87.9892	55.4157	59.1616	65.1318	55.9713	59.9533	64.9913	68.0664	65.2745	56.9228	46.3174	42.1879	44.3376	47.2306	57.1122	53.8558	53.4369	56.8457	55.3703
ENSOART00000001399.1	35.1172	29.6603	20.2409	22.5069	21.4954	38.3048	25.8722	25.8723	24.7095	29.1388	12.2916	13.0998	15.4986	19.7028	17.7944	12.7484	14.3381	20.2619	18.3071	24.8936
ENSOART00000001404.1	21.0662	10.423	7.00021	10.3563	11.1615	9.50765	12.9896	15.5243	16.4749	13.4349	8.08642	6.17178	7.76436	8.86009	8.45958	20.3184	7.94082	12.2988	11.5222	7.50426
ENSOART00000001406.1	3.35037	2.48458	2.10215	2.80427	2.34609	2.82509	3.96349	4.19163	3.51186	3.39579	2.83053	2.84728	2.69035	3.46294	3.24329	3.85841	3.02197	3.7442	2.93057	3.82384
ENSOART00000001402.1	0.950741	0.646111	0.368887	0.699127	0.652286	0.806879	1.24034	1.06985	0.983503	0.715659	1.05487	0.906821	0.743179	0.8785	1.00419	2.24222	1.92834	2.20567	1.80987	1.87789
ENSOART00000001403.1	0.0410701	0	0	0	0.0344847	0.0399446	0.0355716	0.104586	0.0874663	0	0	0	0	0	0	0	0.0330474	0	0	0
ENSOART00000001407.1	12.1768	6.31883	8.24341	9.44452	9.42946	11.9636	9.94776	12.8108	9.75605	10.5883	7.42884	6.32011	7.68935	6.10995	9.91956	10.6263	8.29088	11.9197	6.68756	11.6501
ENSOART00000001409.1	6.03645	5.19672	2.6924	2.52145	4.46126	2.72158	2.04192	4.78459	5.76981	3.89926	6.48946	4.47074	4.03507	6.21684	5.44624	11.7153	12.6652	11.7096	15.505	12.7182
ENSOART00000001401.1	0	0	0	0	0	0	0	0	0	0	0	0	0	0	0	0	0	0	0	0
ENSOART00000001408.1	0	0	0	0	0	0	0	0	0	0	0	0.0176607	0	0	0	0	0	0	0	0
ENSOART00000001405.1	2.35843	1.55322	2.18339	2.1154	6.24323	4.00187	3.81553	4.37272	10.949	8.00402	1.30939	1.17685	1.5168	1.69449	2.19324	5.22728	4.81789	3.45878	3.67642	3.87218
ENSOART00000001433.1	0	0	0	0	0	0	0	0	0	0	0	0	0	0	0	0	0	0	0	0
ENSOART00000001419.1	4.23513	3.04022	2.03058	2.8636	2.11736	3.76807	3.13476	2.18294	2.90795	2.67181	3.16671	3.12681	2.73389	3.06702	3.37135	3.78925	5.72624	5.07081	4.75488	8.34008
ENSOART00000001411.1	103.595	58.8141	54.8294	47.8442	63.148	52.0533	75.9144	84.6166	86.7292	83.7245	31.3119	28.2652	24.4475	33.1865	30.8213	73.1902	82.9928	67.1071	94.3172	87.7442
ENSOART00000001412.1	0	0	0	0	0.0561687	0	0.0622898	0	0	0	0.0359173	0.029678	0	0.0412099	0.0378653	0.214047	0.192824	0.145441	4.88355	10.1901
ENSOART00000001410.1	15.9377	10.9112	13.9676	12.2977	16.4891	12.983	19.8904	13.4399	19.269	17.8866	11.5156	10.0346	10.9046	10.4045	10.2319	14.3367	11.544	13.8384	10.6794	9.38503
ENSOART00000001414.1	0	0	0	0	0	0	0	0	0	0	0	0	0	0	0	0	0	0	0	0
ENSOART00000001415.1	0	0.0169107	0	0	0	0	0	0	0.0174555	0	0	0	0	0	0	0	0.0109168	0	0.0146589	0
ENSOART00000001413.1	0	0	0	0	0	0	0	0	0	0	0	0	0	0	0	0	0	0	0	0
ENSOART00000001416.1	28.8538	20.7102	15.6815	21.4295	18.6712	27.1168	29.1564	31.4595	34.2968	31.5717	13.4683	12.131	10.0741	12.5041	16.2455	14.543	17.8676	17.5126	16.2392	26.3821
ENSOART00000001417.1	0	0	0	0	0	0	0	0	0	0	0	0	0	0	0	0	0	0	0	0
ENSOART00000001418.1	0.0291377	0.114188	0.0919827	0.030631	0	0.170152	0.0252986	0.0745035	0	0.0304005	0.0485104	0.363176	0.47196	0.321437	0.452091	0.0349747	0.157979	0	0.0748515	0.310395
ENSOART00000001420.1	12.7261	8.75172	4.52667	6.07359	7.75166	8.63345	9.40607	8.29139	10.9071	9.33907	4.65851	3.95792	4.60733	5.03208	5.31832	15.267	18.4833	15.5859	18.5392	24.6993
ENSOART00000001423.1	0	0	0	0	0	0	0	0.187905	0	0	0	0	0	0	0	0	0.0462942	0	0	0
ENSOART00000001425.1	55.0814	44.927	24.6943	29.0827	30.4677	59.2946	74.1682	82.7511	67.9798	58.7456	19.6648	16.6653	13.607	18.3999	15.0944	29.5448	33.0832	31.264	34.9905	33.4252
ENSOART00000001421.1	0	0	0	0	0	0	0	0	0	0	0	0	0	0	0	0	0	0	0	0
ENSOART00000001424.1	0.00435823	0.00427483	0	0	0	0.0127466	0.0038027	0	0	0	0.0219884	0.0759028	0.0147003	0.0120303	0.00420652	0.0262476	0.0208424	0.0204602	0.0149303	0.00942687
ENSOART00000001422.1	1.74236	1.12468	0.704716	1.86869	1.45873	1.90579	2.62871	3.88457	4.64813	3.46466	1.28721	1.11727	0.0534619	0.691496	0.632305	2.24794	2.49962	0.260072	0.968984	0.921981
ENSOART00000001426.1	0	0	0	1.73347e-09	0	0	1.85535e-08	0	3.185e-08	0	0.899903	3.76562e-09	0	2.30313e-09	0	2.30409	1.52054e-09	4.82633e-08	1.86324e-09	5.27677e-08
ENSOART00000001429.1	0	0.158006	0	0.168817	0	0	0.139298	0	0.322608	0	0	0.223825	0.567899	0.904415	0	0	1.80765	1.85089	1.56701	0.665368
ENSOART00000001427.1	0	0	0	0	0	0.168795	0	0	0	0	0	0.12027	0	0.161578	0.173016	0.846707	0.764397	0.829737	0.977345	1.42591
ENSOART00000001432.1	26.7093	24.6399	19.7335	20.7127	21.2543	33.0528	29.3846	30.0873	29.7705	28.1811	14.2675	12.6083	11.0726	12.8553	14.9541	27.7881	27.1553	29.8206	28.6904	35.92
ENSOART00000001437.1	0.100354	0.146524	0.512767	0.369476	0.21069	0.121671	0.3235	0.198376	0.275612	0.0916934	0.405557	0.618642	0.936931	0.357087	0.926579	1.22942	1.75809	1.47094	0.971276	1.86079
ENSOART00000001438.1	1.26888	1.13554	0.555998	0.83332	1.00154	1.16106	1.54046	0.743161	0.935371	1.03358	1.01941	0.868086	0.223062	0.715492	0.389719	0.552274	1.40212	1.10594	1.93558	1.89608
ENSOART00000001428.1	1.06251	1.10398	0.556482	0.751953	1.00584	0.898165	1.17729	0.879162	0.979271	0.651069	1.77409	1.98601	1.57045	1.4726	1.82145	1.82409	2.46751	2.48254	1.73187	2.83749
ENSOART00000001430.1	1.8157	0.617364	0.418751	0.481666	0.582009	0.505856	0.425948	0.407681	0.591909	0.799904	0.370283	0.225023	0.227555	0.602524	0.35891	3.23226	1.87487	0.569641	1.16856	2.20127
ENSOART00000001431.1	0	0	0	0	0	0	0	0	0	0	0	0	0	0	0	0	0	0	0	0
ENSOART00000001434.1	13.6796	15.1875	7.3767	11.5971	7.48762	3.29451	0.951839	5.01797	2.72784	1.44683	27.8648	33.1091	27.7782	19.2985	22.8865	35.0611	47.6047	68.0099	42.8865	39.0828
ENSOART00000001435.1	97.7184	82.5893	44.0453	58.5609	56.7232	85.0909	88.2404	73.1265	74.4822	78.2464	54.1428	47.1251	40.339	48.5463	54.4753	59.6307	100.518	89.6165	97.1314	149
ENSOART00000001436.1	1.36098	0.39406	0.154799	0.350375	0.153286	1.56226	1.00076	0.63501	0.841931	0.865031	1.58547	1.33463	2.04646	1.25629	1.67269	0.74126	0.993375	1.13622	1.01152	1.08989
ENSOART00000001442.1	0.635566	0.0759853	0.0985548	0.179702	0.30408	57.7014	119.761	24.3629	60.2928	54.5048	3.87975	3.67248	3.1483	3.17946	4.94787	8.83659	7.13768	12.0481	5.77473	5.99433
ENSOART00000001440.1	0	0	0	0	0	0	0	0	0.0131611	0	0.0219053	0.0268774	0.0173902	0.0237085	0.0249175	0.0155042	0.0494944	0	0.0446375	0.166379
ENSOART00000001439.1	0	0	0	0	0.0277327	0	0	0	0	0	0.0546242	0.0909221	0	0	0	0.0394171	0.0104803	0.0308309	0	0
ENSOART00000001441.1	0.0465574	0	0	0	0	0.0453306	0.222586	0	0.213187	0.121655	0	0.0322846	0	0	0.0225489	0.139825	0.0519656	0.0218468	0.0398685	0.0497728
ENSOART00000001443.1	2.77944	2.50888	2.10599	2.55595	2.31912	1.93202	1.83397	2.37355	1.85843	1.60922	2.02668	1.64561	0.78878	0.892074	2.11932	1.49756	2.06491	1.70755	1.27912	3.06721
ENSOART00000001447.1	0.0178156	0	0.0565662	0.0187673	0	1.16262	1.08522	0.160011	0.272444	0.223826	0.759831	0.90304	0.733298	0.688153	0.68957	0.364114	0.505612	0.969873	0.778088	0.917254
ENSOART00000001444.1	53.3037	51.4976	66.855	70.324	171.875	8.15242	12.1126	9.7737	15.8452	16.0541	4.87212	3.76811	5.25808	6.35362	5.29663	16.269	10.51	11.1142	10.427	10.7192
ENSOART00000001446.1	0.206884	0.232599	0.192575	0.217425	0.19103	0.251	0.468325	0.217702	0.281667	0.12401	0.481242	0.459623	0.423346	0.456202	0.481491	7.47238	6.09679	12.3499	8.723	2.32011
ENSOART00000001445.1	0	0	0	0	0	0	0	0	0	0	0	0	0	0	0	0	0	0	0	0
ENSOART00000001449.1	24.7678	12.6001	17.5259	17.126	23.3465	20.2715	20.4029	22.7809	30.2796	32.4981	14.6317	8.75825	10.5135	14.1224	14.3106	17.5292	15.4598	16.2006	17.0649	15.194
ENSOART00000001450.1	0	0	0	0	0	0	0	0	0	0	0.163625	0.157067	0.180043	0.271153	0.0648339	3.41102	1.40422	1.9369	1.31079	1.79636
ENSOART00000001448.1	0	0	0	0	0	0	0	0	0	0	0.431497	0.390698	0.796621	0.517559	2.82409	0.681383	0.564096	1.09642	0.504529	0
ENSOART00000001457.1	5.35053	3.93499	2.46057	3.97809	4.11774	6.52691	5.40328	3.45919	7.5031	5.63688	3.77238	3.28678	3.68911	4.11835	5.03877	5.7084	7.71242	7.38491	6.23417	9.94514
ENSOART00000001458.1	16.676	11.1487	7.4777	9.63706	8.85208	14.8073	15.5711	15.7787	12.3153	12.3342	8.01472	7.83408	7.58724	8.34115	7.12735	15.8587	19.5831	17.396	19.8212	22.5832
ENSOART00000001451.1	0.718271	0.423997	0.294606	0.150458	0	0	0	0	0.432619	0	0	0.099506	0.10049	0	0.143423	11.2964	7.35811	13.7027	5.3134	3.56521
ENSOART00000001455.1	52.2253	51.4415	57.8453	51.3429	40.3825	52.8635	71.1661	53.3806	55.7901	47.8358	64.7717	61.0897	52.9333	62.1068	61.3341	79.7207	86.6775	102.274	94.6034	90.9729
ENSOART00000001452.1	0.344276	0	0	0	0.0708915	5.20279	0.148589	0.32565	0.0862497	0	5.91275	8.05123	6.40396	12.7107	10.8139	71.9772	61.9641	82.1656	57.307	61.5418
ENSOART00000001453.1	0.0877444	0.0573101	0.0307754	0.061493	0.0494771	13.6921	21.3816	16.8262	33.6502	21.818	3.25208	3.43329	2.67016	6.95712	7.98747	176.144	84.0331	171.781	95.6865	103.655
ENSOART00000001454.1	0.301878	0.445047	0	0.157863	0.122409	2.80262	2.08838	7.38205	6.35454	5.62909	0.245143	0.104547	0.423234	0.703154	0.301042	48.0409	34.7157	56.3073	33.0961	24.3297
ENSOART00000001456.1	0	0	0	0	0	0	0	0	0	0	2.25715	3.15168	2.61743	0.686616	3.71407	0	1.23889	4.33152	1.32778	1.53014
ENSOART00000001459.1	12.1026	10.4699	5.64761	7.51098	7.6479	12.4451	12.5483	11.143	12.8231	13.7144	5.49061	6.34097	4.59211	4.87199	6.5437	11.0605	16.0765	13.9558	15.2967	20.6536
ENSOART00000001460.1	0.164258	0	0	0.0192243	0.0776989	0.0177761	0.0158805	0	0.0186039	0.0191054	0.19838	0.139385	0.233987	0.218201	0.158958	0.175524	0.151317	0.171304	0.187553	0.313139
ENSOART00000001461.1	0.106729	0	0	0	0	0.017326	0.0154793	0	0.0706065	0	0	0.0123515	0.0120028	0	0	0.0427713	0.0537573	0.0166963	0.121865	0.0381608
ENSOART00000001463.1	0.0331381	0	0	0	0	0	0	0	0	0	0	0	0	0	0	0.039754	0	0.0310955	0	0
ENSOART00000001462.1	11.5714	7.99424	7.98836	6.93996	10.1558	13.7564	16.3419	11.6653	17.7357	12.9155	8.45916	5.68683	5.87673	7.27071	8.73692	19.1333	13.9905	21.1612	13.1705	14.6051
ENSOART00000001464.1	0	0	0	0	0	0	0	0	0	0.542201	1.22081	1.44995	0.749621	0.486003	1.05977	1.92388	0.710242	1.03235	0	1.07541
ENSOART00000001465.1	0	0	0	0	0	1.08886	2.0214	1.81724	1.71082	1.42434	0	0	0	0	0	29.7698	32.6141	36.4188	21.2828	20.5899
ENSOART00000001478.1	1.85076	1.27171	0.527034	1.18399	1.28788	1.63624	1.45015	1.08056	1.28686	1.04795	0.376767	0.452378	0.323338	0.531189	0.376373	0.76409	1.51514	0.623745	1.12403	1.03363
ENSOART00000001482.1	2.68382	2.32169	1.29683	1.45075	1.63533	2.70921	3.0954	1.35039	2.4091	2.4838	0.628631	0.81792	0.703485	0.808627	1.1914	1.37799	3.71069	2.40715	2.70357	5.31126
ENSOART00000001468.1	0.006958	0	0	0	0	0	0.00606795	0	0	0.0365451	0.14027	0.0775063	0.0704113	0.0576145	0.127663	0.0083779	0.00443688	0.0261304	0.0357542	0
ENSOART00000001466.1	0.916697	1.05678	1.37765	1.78825	1.01227	1.09698	2.17164	1.13625	3.21002	2.85421	1.56098	3.57045	1.47826	2.30411	2.16335	1.58918	3.6512	4.11899	2.80549	3.93042
ENSOART00000001467.1	75.4058	46.9967	25.1646	37.0952	72.4272	105.153	84.3897	69.6093	101.207	105.731	18.886	14.0402	15.0064	26.4331	21.4672	115.346	101.399	51.1024	114.457	132.791
ENSOART00000001470.1	0.00949186	0.0990811	0.0252836	0.0100228	0.0122228	2.33649	0.012422	0.0794921	0.0145817	0.0299325	1.59205	2.40999	1.26144	3.95556	2.13986	4.51008	6.11607	1.84611	6.79878	6.89676
ENSOART00000001472.1	142.899	98.9899	50.2971	58.1901	57.3712	90.4793	153.609	114.386	122.98	129.908	5.36052	5.14537	6.88667	10.0032	10.9057	26.146	26.1722	28.6017	23.9684	28.5788
ENSOART00000001491.1	0	0	0	0	0	0.334369	0.486842	0.349875	0.585012	0.237552	0.0844307	0.193003	0.059317	0.092605	0.0182053	0.446205	0.37268	1.4861	0.430393	1.23714
ENSOART00000001469.1	0	0	0	0	0	0	0	0	0	0	0	0	1.23897	0	0	0	0.302424	0.880398	0	0
ENSOART00000001471.1	0.430014	0.301121	0.276666	0.388447	0.471573	0.164571	0.0935952	0.098602	0.0783524	0.160909	0.629945	0.405464	0.569927	0.81927	0.549595	0.0923492	0.479914	0.115326	0.552383	0.329955
ENSOART00000001473.1	318.393	273.489	295.092	330.25	426.73	266.251	265.049	249.813	326.393	353.942	82.7251	76.5753	70.6964	98.4693	76.3832	152.642	130.822	128.578	132.269	126.853
ENSOART00000001475.1	0.124859	0	0	0	0.0530735	0.303974	0.34386	0.0533504	0.211935	0.108835	0	0.057756	0	0	0	31.2347	14.7189	50.5071	8.46471	1.55964
ENSOART00000001474.1	0.337483	0	0	0	0	0.110049	0.0973909	0.141792	0	0.116866	0	0	0.155407	0.251456	0.336464	0.724752	0.633279	0	0	0.265734
ENSOART00000001480.1	22.9629	20.0356	12.9303	13.0973	15.0756	21.5204	25.4802	25.7983	24.4332	24.6336	19.4281	16.3418	14.4965	17.7823	16.4806	16.5169	23.1244	18.2116	20.6482	25.9142
ENSOART00000001477.1	101.303	78.3318	57.6717	72.9702	60.4704	10.993	8.02378	16.4996	12.075	11.8427	45.1903	31.6129	32.2548	26.2953	36.2434	7.64177	12.2819	17.3921	12.471	13.7753
ENSOART00000001476.1	0	0	0	0	0	9.46133	12.5316	7.95297	9.40431	5.45528	0.151129	0.220555	0.678684	0.0839339	0.399836	14.1134	11.4706	25.1222	8.91493	13.9204
ENSOART00000001481.1	16.0669	7.46463	6.65898	7.57915	6.11974	5.24246	7.0409	9.76259	7.24637	7.66076	8.12149	6.70324	7.50487	6.65824	7.01036	7.09628	8.26435	7.67684	8.07661	8.26579
ENSOART00000001479.1	0.302792	0.38089	0.224698	0.401545	0.131777	0.130279	0.151684	0.196619	0.0716306	0.238161	0.0408893	0.157515	0.11419	0.114529	0.240989	0.353684	0.0943195	0.15138	0.166236	0.241979
ENSOART00000001484.1	170.818	155.761	114.973	129.067	135.56	180.391	255.601	247.381	232.123	223.331	65.6574	51.7961	51.0593	63.5632	70.9679	103.592	114.461	104.08	113.766	144.873
ENSOART00000001487.1	11.79	9.10249	6.47471	8.00097	7.61342	10.2921	13.3783	9.07416	11.7662	11.2653	4.89393	4.17974	4.06986	3.54468	4.27046	6.95558	11.5102	7.78994	11.1176	13.9861
ENSOART00000001488.1	0	0.371466	0	0.311695	0.18003	0.0960907	0.477061	0.277582	0.326001	0.104211	0	0.431955	0.287363	0	0.104579	0.136697	0.322457	0.105421	0.43273	0.815534
ENSOART00000001483.1	0	0	0	0	0	0.0774238	0	0	0	0	0	0	0	0	0	0	0.0253901	0	0	0
ENSOART00000001490.1	46.1274	29.0656	20.2505	25.887	27.2688	23.8528	38.2623	32.9953	36.3768	34.4405	17.456	13.2126	14.1169	16.7878	17.0996	28.7922	26.1454	27.2748	28.2374	26.1909
ENSOART00000001485.1	1.36464	1.41537	1.34707	1.62779	1.74617	0.758797	1.21205	1.05227	1.08148	1.24361	1.19318	0.98699	0.586937	0.866988	1.56117	0.461174	0.865175	0.719477	0.75391	2.26024
ENSOART00000001486.1	0	0	0	0	0	0	0	0	0	0	0	0	0	1.17576	0	0	0	0	0	0
ENSOART00000001489.1	0.586637	0.131422	0.0131835	0.0383769	0.0311023	0.402572	0.507923	0.312658	0.433723	0.38221	0.662472	1.38655	0.561549	1.26466	0.916923	1.62403	2.11127	1.66583	1.25917	2.21595
ENSOART00000001492.1	0.25644	0	0	0.145919	0.539544	0.13064	0.254802	0.173629	0	0.46037	0.338344	0.115798	0.354185	0.255707	0.139497	0	0	0.283526	0	0.30777
ENSOART00000001494.1	20.9332	16.0278	12.4388	12.5492	11.7275	15.3524	21.62	20.8799	22.6963	22.5774	12.9603	6.90741	8.29879	10.3487	10.1376	14.3523	7.73155	12.7371	12.4924	10.1111
ENSOART00000001493.1	10.7647	8.38252	8.20925	10.6148	10.6561	7.54856	13.1873	9.40592	8.81621	5.34376	22.3086	22.0246	21.185	18.1449	20.1348	12.4033	20.2862	22.6271	20.1936	26.7553
ENSOART00000001497.1	0	0	0	0	0	0	0	0	0	0	0	0	0	0	0	0	0	0	0	0
ENSOART00000001496.1	0.122554	0.0960767	0.0517059	0	0	3.19764	13.0575	8.50464	20.1938	10.6022	5.00829	5.76017	2.72926	8.49633	5.77077	238.229	216.961	322.886	137.815	180.513
ENSOART00000001495.1	1.73672	1.40562	2.24276	1.37791	6.40768	1.34428	1.83325	0.915611	5.24259	2.59715	1.19513	1.16768	1.06808	1.84257	2.64288	2.14389	1.60865	1.39889	1.74529	1.67948
ENSOART00000001498.1	27.6708	12.5532	7.78866	11.0225	15.1858	14.4686	9.91714	15.9722	18.8233	18.0581	19.1064	13.5595	14.5292	17.0189	19.4245	10.8556	8.81034	11.655	8.53533	7.89654
ENSOART00000001504.1	20.9359	15.8802	11.9068	12.6369	12.0726	18.8901	17.0395	17.6087	16.917	19.1248	8.71003	7.73498	7.39072	7.4146	8.8157	11.6342	13.8738	13.2786	13.1574	16.1013
ENSOART00000001505.1	0.295358	0.238178	0.0279471	0.0969966	0.112567	1.97053	1.1277	1.84247	1.1689	0.786084	0.435616	0.959688	0.491499	0.676341	0.399274	0.655978	1.12166	1.59603	1.24228	1.04915
ENSOART00000001501.1	0	0	0	0	0	0	0	0	0	0	0	0	0	0	0	0.0481182	0.0383016	0.0563651	0.0685705	0
ENSOART00000001508.1	0	0	0	0	0	0.203148	0	0	0	0	0.815039	0.753587	0.694054	0.882241	0.887118	4.76555	5.71788	7.25511	5.0237	6.21758
ENSOART00000001500.1	0.0291309	0	0	0	0	0	0	0	0	0.0457937	0.439084	0.576934	0.294829	0.348324	0.60568	0.54309	0.696663	0.546896	0.636154	0.563555
ENSOART00000001506.1	1.68702	2.60651	5.12831	4.38725	8.18433	3.88077	5.76185	3.57056	7.79132	4.39556	5.06094	5.75241	4.94312	5.41382	4.09388	8.53506	9.55394	9.8341	5.98073	4.48262
ENSOART00000001499.1	4.35268	2.40172	1.52891	2.60837	1.21291	4.88219	5.97603	4.26351	3.56232	2.10424	9.07725	9.85551	9.12493	8.47525	6.17836	19.2983	20.5716	26.9611	18.0432	16.7326
ENSOART00000001502.1	0	0	0	0	0	0	0	0	0	0	0	0	0.842489	0	0	1.45758	0	1.17169	0.537765	0
ENSOART00000001503.1	0.895809	1.28988	0.918764	1.09675	1.45672	55.5804	62.7766	53.0676	57.8233	42.6207	1.5417	1.50874	1.00669	1.27084	1.59779	76.251	54.7704	42.7458	59.5153	21.435
ENSOART00000001515.1	0.00631642	0	0	0.0066678	0	0.0554137	0.0110183	0	0.0258618	0	0.0212283	0.0219908	0.00426121	0.00581147	0.030494	0.228182	0.55784	0.723501	0.200155	0.695947
ENSOART00000001512.1	50.3566	33.9809	22.8366	29.9636	26.1535	40.6105	49.1963	37.5849	44.4107	44.9805	25.3939	20.8424	22.359	28.564	24.5263	70.8222	105.609	48.4919	116.46	159.189
ENSOART00000001507.1	0.646475	0	0.305124	0.245913	0.440296	0	0.253841	0.297834	0.236397	0.243664	0.581255	0.40467	0.636543	0.810159	1.60473	1.54806	1.89771	0.993552	0.705404	2.09357
ENSOART00000001510.1	0.640659	0.6353	0.249986	0.781387	0.793281	0.728541	0.782166	0.513219	0.699298	0.433677	1.04034	1.11006	1.27742	1.00857	1.27173	0.471399	0.853368	1.15619	0.542582	0.983753
ENSOART00000001511.1	14.7699	12.5981	8.80643	10.8516	11.5007	16.1069	16.2341	8.6042	15.1945	16.1572	5.06179	3.73867	3.12061	4.19072	4.07194	11.4374	18.3282	7.79689	18.2733	24.9726
ENSOART00000001509.1	7.87507	2.80351	5.0357	5.53129	14.6892	9.42583	9.27846	6.07186	25.1615	23.406	4.13326	3.82925	6.1437	6.52613	8.42135	33.744	20.6107	28.735	12.639	17.1096
ENSOART00000001513.1	36.8767	36.8649	33.6556	33.5254	31.8777	31.0329	44.5985	44.7039	43.9894	32.6532	34.9185	39.9536	34.5208	38.0999	41.1627	35.6159	43.277	45.406	44.7059	49.7695
ENSOART00000001514.1	0	0	0	0.0352592	0.0849713	0	0.352925	0	2.62907	1.27336	0.575176	1.07835	0.406095	1.78984	1.08162	29.5909	19.4851	26.4466	6.0954	9.95732
ENSOART00000001521.1	0	0	0	0	0	0.0452155	0	0	0	0	0	0.0641292	0.0393373	0	0	0	0.0520778	0.247239	0.0796139	0
ENSOART00000001517.1	4.33208	4.39292	3.55693	4.01864	4.2464	7.22567	6.75084	5.3046	7.4899	5.38272	3.43836	3.88317	3.96528	3.43142	3.42646	4.48396	5.48489	7.91017	6.92363	7.02351
ENSOART00000001523.1	0	0	0.015027	0.0119062	0.00242195	0.0137373	0.00983788	0.0145315	0.00288792	0	0	0.00589139	0	0.0103718	0	0.0509238	0.0458178	0.0899601	0.0096536	0.0183027
ENSOART00000001516.1	0	0	0	0	0	0	0	0	0	0	0.750822	0	0.680085	0.293084	0.319854	0.763344	0.211588	0	0.283721	0
ENSOART00000001519.1	0.25504	0.113609	0.0978861	0.0976004	0.118095	0.180597	0.362779	0.118792	0.28312	0.0727029	0.309552	0.434106	0.359862	0.170552	0.336873	0.16712	0.517574	0.522224	0.198544	0.0991525
ENSOART00000001525.1	51.7321	33.9997	17.1458	25.3026	25.896	44.1755	41.337	22.6925	29.8675	31.468	7.73514	6.50321	7.37645	13.3384	9.98331	28.7726	50.5263	17.2829	49.281	74.5308
ENSOART00000001520.1	0	0	0	0	0	0	0	0	0	0	0.109599	0.187812	0.0990744	1.05498	0.998313	3.01055	3.33511	0.579584	2.99869	0.297387
ENSOART00000001522.1	6.90303	7.42405	7.91281	8.55249	8.99374	5.01989	5.64706	9.44398	7.02877	7.41118	26.0598	20.4677	19.072	21.0308	24.5954	0.597407	0.226988	0.233713	0.0609426	0.226498
ENSOART00000001530.1	0.074719	0	0	0	0.0211214	0	0	0	0	0	2.20146	2.24434	0.840399	1.0992	2.09957	0.0299134	0.0714861	0.0233734	0.149295	0.106401
ENSOART00000001527.1	1.28852	0	0	0	0	0	0	0	0.234902	0	0.095391	0	0.0809538	0	0.232668	0.564901	0.799417	0.556181	0.510283	0.727886
ENSOART00000001524.1	0	0	0	0	0	0	0	0	0	0	0	0	0	0	0	0.0457479	0	0	0	0
ENSOART00000001535.1	9.1484	6.63238	5.41707	9.98919	13.9704	9.767	17.2282	8.27752	20.1851	14.0765	3.00301	2.8456	4.06564	6.42664	5.84142	8.04451	13.0381	10.9636	9.14373	14.7344
ENSOART00000001540.1	6.13397	5.97761	4.01854	2.35198	0.0134946	6.94023	5.69953	7.36432	0.326405	2.91249	4.78884	4.70269	3.285	0.365384	2.1614	3.27571	4.18803	0.971083	6.66213	7.00233
ENSOART00000001531.1	3627.19	3745.62	3389.8	3649.64	3508.51	4015.64	3395.02	3637.72	3441.16	3999.14	980.456	742.814	760.442	1069.64	826.85	2062.73	2275.54	1650	2226.54	2099.4
ENSOART00000001528.1	1.07239	0	5.93465	2.35158	2.79689	930.039	1096.48	1160.88	1011	696.85	52.8009	48.0365	55.6581	95.7367	57.3696	421.103	316.827	583.312	270.629	375.628
ENSOART00000001532.1	23.1895	28.4857	28.179	28.7204	33.1939	29.0949	43.593	34.214	39.9449	31.4668	21.6253	17.2288	18.5444	22.0228	18.2975	23.8574	30.4218	29.5816	33.1983	28.7366
ENSOART00000001533.1	1.48273	0	1.11071	0	0.916169	0	0.577047	0	1.06705	1.2344	0.345834	0.159161	0.309429	0.213711	0.808961	0.512336	0.36097	0.939836	0.609073	0.469208
ENSOART00000001543.1	3.90445	2.8547	1.04247	1.19461	1.20769	4.9344	3.41531	4.76822	2.63343	1.97603	6.23359	8.61534	6.37146	3.88403	7.57252	3.14772	5.65006	5.1402	6.83644	5.27671
ENSOART00000001534.1	5.67689	3.10054	2.73447	3.20897	2.97296	2.77048	3.31397	3.70055	3.53918	3.33505	0.734213	1.32365	1.12689	0.515931	0.615008	2.07186	2.98656	4.02808	2.68713	3.00131
ENSOART00000001537.1	0.807568	0.167293	0.0845448	0.239917	0.204227	9.05518	7.11574	4.70888	1.81304	1.50341	2.79431	2.2544	2.60148	2.22862	2.96806	5.3926	5.57059	7.51707	6.77966	4.43391
ENSOART00000001536.1	0.0321712	0	0	0	0.0814975	0	0	0	0.0652631	0	0	0.0667814	0.0217157	0.0591498	0.0936457	0.231596	0.0718325	0	0	0.0684162
ENSOART00000001539.1	1.7488	0.71315	0.301534	0.989509	0.784426	1.13534	0.817478	0.552619	1.31521	1.66006	5.73801	4.65772	6.58229	4.15862	5.77607	1.74551	2.56977	3.15596	1.62935	3.34126
ENSOART00000001538.1	0	0	0	0	0	6.70482	12.0697	10.6555	17.7511	10.938	0	0	0	0	0	219.019	240.608	274.886	136.521	133.549
ENSOART00000001541.1	4.62097	1.44618	1.29154	1.54676	1.27549	3.19636	6.34726	3.8729	4.03648	4.35192	5.43504	3.08765	5.27822	2.88874	4.63538	2.22432	2.40195	4.42469	2.85469	4.21578
ENSOART00000001542.1	0.0178706	0.0175175	0	0	0	0.0174061	0.0155508	0.0458577	0.0546559	0	0.283942	0.223352	0.144701	0.131481	0.242097	1.48243	1.27078	0.972866	1.01005	1.34175
ENSOART00000001544.1	0.197996	0.0387822	0	0	0.0998277	0	0	0.201796	0.200244	0.0823777	0	0	0	0	0	0	0	0	0	0
ENSOART00000001545.1	0	0	0	0	0	0	0	0	0	0	0.459136	0.582932	0.607321	0.613773	0.591125	1.01047	0.851726	0.680968	1.06884	0.742195
ENSOART00000001549.1	58.5186	42.0249	40.2606	44.4441	55.5659	97.5398	112.308	73.8613	104.858	92.4261	37.8868	37.4429	38.3642	54.0725	38.4666	162.578	147.753	166.265	129.975	142.87
ENSOART00000001546.1	0	0	0	0	0	0	0	0	0	0	0.0685422	0.0309893	0.0650715	0.0273046	0.100316	0.0535983	0.0615058	0.0766243	0.00635429	0.0800918
ENSOART00000001547.1	4.18816	2.68696	2.32542	3.71737	5.0819	6.41975	3.73546	4.36981	5.76021	5.91118	3.60229	2.75385	2.62526	2.99356	4.12843	44.9152	8.28284	8.79716	5.25302	10.062
ENSOART00000001548.1	0.0161167	0	0	0	0	0.0627985	0.0140294	0	0.0328812	0	0.107898	0.235103	0.271864	0.14823	0.296215	0.0193806	0.0565307	0.0756397	0.0552075	0.0346101
ENSOART00000001551.1	17.5239	12.9084	9.85849	10.8476	12.486	18.3937	17.8585	18.2189	20.261	18.321	11.5156	10.3381	9.77604	11.1474	10.5108	33.1351	25.6328	33.6703	25.916	25.0891
ENSOART00000001552.1	11.8105	10.4258	6.24446	9.74892	10.727	13.31	14.3486	10.0515	12.1755	11.4509	8.7754	8.1071	8.11291	8.81076	9.41374	9.23724	15.0525	14.954	12.8809	19.6672
ENSOART00000001572.1	6.13024	2.96361	2.60939	2.83615	2.71414	5.21357	6.60242	6.47236	7.42473	5.78256	6.31348	6.16534	5.71366	5.64591	6.81754	18.3131	18.6469	24.9738	16.3668	17.6954
ENSOART00000001558.1	0	0.0263256	0.0142408	0	0	0	0.0116929	0	0.027416	0	0.0112473	0.0466597	0.0271745	0.0123489	0	0.0161503	0.064212	0.0126025	0.0574864	0
ENSOART00000001550.1	0	0	0	0	0	0	0	0	0	0	0.930266	0.761016	0.262601	0.789039	0.0840301	0.821113	1.09215	1.4209	0.814077	0.182545
ENSOART00000001581.1	0	0	0	0	0	0	0	0	0.0131103	0.0134606	0	0.00892447	0.00866133	0	0	57.5051	16.0267	100.607	19.2259	11.7945
ENSOART00000001554.1	6.04073	9.31524	3.95601	3.63103	3.99929	13.4708	5.30847	10.4465	6.62277	7.71057	6.80497	5.95289	6.46561	4.7051	7.51827	8.0588	24.5408	4.59894	20.8637	32.0308
ENSOART00000001553.1	0	0	0	0.135305	0	0	0	0	0	0	0	0.0892803	0.0898668	0	0	0	0	0.122837	0	0
ENSOART00000001555.1	28.0709	29.3992	16.6751	18.336	31.7181	30.37	30.8707	22.5235	33.3622	31.5934	7.55472	7.4231	12.5098	12.2021	16.715	17.5921	17.0988	12.8947	16.6017	26.2985
ENSOART00000001556.1	8.39263	8.74498	8.87089	9.37305	10.2028	7.49862	13.7664	10.2112	11.91	8.41757	10.5168	10.842	9.20971	9.83459	8.93362	10.1352	13.5311	28.2767	13.1006	16.5364
ENSOART00000001565.1	0.391397	0.106609	0.0346431	0.0344023	0	0.0953514	0	0	0.011111	0.0114069	1.0212	2.21565	2.21523	1.07015	2.2274	1.42611	2.02448	1.20436	2.44878	2.95126
ENSOART00000001560.1	4.32775	4.11617	1.49377	4.02548	2.80957	2.87924	3.79972	3.40876	2.86942	2.61733	1.5708	1.95063	0.943383	0.715017	2.69742	2.43474	5.8457	3.93978	3.85961	11.7957
ENSOART00000001561.1	2.01318	0.69219	0.583789	3.03202e-08	0.767454	1.8302	1.45121	0.659292	0.970629	0.918317	0.799483	1.14688	0.297764	1.46707	0.424242	2.70982	4.82065	2.34308	2.36884	8.29653
ENSOART00000001559.1	0	0	0	0	0	0	0	0	0	0	0	0.0220543	0	0	0	0	0.0253081	0.0148999	0.0407812	0.0340932
ENSOART00000001557.1	0	0	0	0	0	0	0	0	0	0	0	0.144505	0.0373383	0	0	0	0	0	0.0932999	0
ENSOART00000001562.1	29.0302	29.6273	18.3792	21.338	24.4129	24.328	26.8246	34.6609	28.2836	29.6551	13.9538	13.2285	10.89	15.1253	14.1219	15.8106	18.8131	20.6947	17.2647	19.3558
ENSOART00000001566.1	24.9362	28.6626	22.5993	25.4485	23.9092	31.435	34.7438	36.213	32.4202	30.7205	14.0232	12.7119	11.6013	12.8075	10.5965	19.153	21.0684	21.146	19.0074	21.3214
ENSOART00000001567.1	6.01867	6.12672	4.51004	6.11084	5.48765	8.25787	10.1705	5.59235	9.39076	9.31143	3.0547	1.91091	1.82295	2.29415	2.13539	4.19352	6.25488	3.93956	4.90236	5.44123
ENSOART00000001570.1	31.0497	21.8202	17.054	18.4533	20.2973	17.9965	18.3119	14.3647	17.2309	15.1011	12.7175	11.6236	10.8967	9.08154	11.7642	13.596	15.8687	19.7527	14.4447	24.5525
ENSOART00000001569.1	6.75256	4.7537	3.07212	3.37656	4.58109	9.41901	9.27353	9.70928	10.0185	8.42444	3.79175	3.10737	2.90228	5.24676	3.84654	7.44144	7.42358	6.59381	6.06405	8.86998
ENSOART00000001564.1	0.0248584	0	0	0	0.0215406	0.379407	0.133644	0.383134	1.47841	0.389784	25.8141	34.5164	10.8063	30.7668	25.7317	390.548	491.937	475.146	265.964	331.243
ENSOART00000001563.1	0.297699	0.408508	0.545564	0.710568	0.455817	0.85044	1.58824	0.305379	0.647016	0.47761	1.80759	1.98344	1.44636	1.55135	2.2478	1.59818	1.91132	2.16078	2.3624	3.31682
ENSOART00000001568.1	0	0	0	0	0	0	0	0	0	0	0	0	0	0	0	0	0	0	0	0
ENSOART00000001574.1	11.9361	9.52689	4.28527	7.6368	6.32612	12.8652	12.8709	10.7715	11.7512	11.1729	5.04573	3.87253	4.51388	5.40156	5.20152	6.15448	7.47268	11.1633	6.28321	10.3842
ENSOART00000001573.1	12.353	5.75062	5.73078	7.08189	10.2502	10.0953	11.1432	5.56822	12.3956	10.8635	6.35331	5.63077	5.32906	5.82151	6.55827	12.2449	11.2764	10.4755	9.55828	11.0447
ENSOART00000001571.1	14.8864	2.39569	1.00604	1.40718	3.48609	9.19289	42.1277	120.859	98.3502	23.9394	20.0794	19.5747	16.3265	35.6869	28.1517	152.566	175.525	113.468	137.16	117.329
ENSOART00000001575.1	1.69409	1.70507	0.736318	1.23231	1.57546	81.7369	122.195	161.845	130.04	110.676	1.32304	0.194708	0.731198	0.518882	1.51086	19.551	0.750832	9.31551	7.73611	10.0178
ENSOART00000001578.1	49.2783	38.3445	28.4909	30.9872	31.0358	47.4824	53.7976	59.752	56.3581	57.0162	20.885	16.6895	14.1205	17.4926	17.6232	26.9601	34.0198	27.0538	31.118	30.8752
ENSOART00000001577.1	0.0298636	0	0.0158266	0.047213	0	0.0290932	0.156013	0.115057	0.106667	0	0.112515	0.072627	0.0503744	0.0549354	0.17329	0.0359175	0.214257	0.0700808	0.166235	0.0962666
ENSOART00000001576.1	0.809823	0.398614	0.278064	1.83897	1.53961	0.793057	0.58578	0.679312	0.271292	0.980985	1.42703	1.30834	1.78939	1.38373	1.88368	2.93612	2.25204	2.82851	2.01482	2.79385
ENSOART00000001579.1	0	0	0	0	0	0	0	0	0	0.0680486	0	0	0	0	0	0.969633	0.219164	1.00132	1.14918	0
ENSOART00000001582.1	58.8246	53.3608	36.1216	39.1491	36.9025	69.0121	68.4984	69.7834	78.3376	86.9512	41.1693	35.2304	33.4094	24.5342	39.4063	57.4463	76.8271	47.8365	53.0016	116.552
ENSOART00000001580.1	1.34993	0.331437	0.464093	1.29635	1.75054	0.330146	0.292173	0.283584	0.225685	0.467463	1.28511	0.932534	0.543924	1.25466	1.45062	1.76305	1.27827	1.92245	0.882106	1.16573
ENSOART00000001595.1	0.104546	0.0854369	0.0741099	0.101121	0.0969941	0.246239	0.197471	0.269058	0.187115	0.0823206	0.329076	0.333453	0.446703	0.24045	0.378711	1.13264	1.98056	2.06115	2.07422	3.38294
ENSOART00000001584.1	385.22	239.513	153.871	189.914	190.397	322.198	330.514	335.867	339.796	376.35	109.155	75.4797	98.0107	112.677	94.0122	194.19	208.268	155.957	225.526	209.184
ENSOART00000001583.1	235.607	194.149	153.237	169.709	141.454	203.708	221.54	211.33	221.413	209.134	155.064	149.138	138.811	147.048	156.206	234.98	274.09	204.101	321.754	342.793
ENSOART00000001585.1	0	0	0	0	0	0	0	0	0	0	0	0	0	0	0	0	0	0	0	0
ENSOART00000001586.1	11.4319	7.10739	3.30802	3.98014	3.85858	5.41587	7.70826	5.42234	6.73663	6.84167	2.44622	2.44642	2.64921	3.76157	2.66577	6.97542	8.73393	6.57103	8.45374	12.3049
ENSOART00000001587.1	2.09074	1.97875	1.77384	1.13914	1.59623	1.15863	1.55266	1.36432	1.45152	0.924568	1.25092	1.67691	0.93645	0.745911	1.06392	0.780046	1.45984	1.30262	1.17304	1.39177
ENSOART00000001588.1	0	0	0	0	0	0	0	0	0	0	0	0	0	0	0	0	0	0	0	0
ENSOART00000001592.1	2.93082	2.36794	1.75659	1.83009	1.64112	0.947823	1.82765	1.1135	1.84719	2.04401	1.05041	0.912812	0.884012	0.864322	1.0518	1.21628	1.28632	1.58757	1.5688	1.30012
ENSOART00000001593.1	0	0	0	0	0	0	0	0	0	0	0	0	0	0	3.15469e-10	0	0	0	0	0
ENSOART00000001590.1	11.2283	8.42162	4.97703	6.15981	6.9191	7.8766	10.1118	7.81305	8.12083	6.86602	5.11645	5.52377	4.92361	5.62635	5.85563	8.13997	12.9683	11.0125	10.8891	16.4059
ENSOART00000001591.1	0	0	0	0	0	0.079114	0.047064	0.0693178	0.137657	0.0848515	0.0451421	0.244	0.127986	0.0498154	0.0262618	0.748158	1.28739	0.915236	1.04396	1.32922
ENSOART00000001589.1	0	0	0	0	0	0	0	0	0	0	0	0.0728527	0.145441	0	0	0	0.0684616	0.200154	0.183469	0.437996
ENSOART00000001596.1	27.5458	10.5667	6.61818	10.2381	10.8383	18.671	15.2886	17.8328	18.4025	16.5417	12.5057	10.8971	10.6286	12.7827	13.6994	28.5165	27.6334	21.8492	28.544	28.4302
ENSOART00000001597.1	0.700966	0.542434	0.481856	0.717681	0.205579	0.624373	1.18515	0.950765	1.22652	0.650043	1.54353	2.35828	1.72775	1.17049	1.11735	2.16549	3.01413	1.75581	2.00413	1.35305
ENSOART00000001594.1	0	0	0	0	0	0	0	0	0	0	0	0	0	0	0	0	0	0	0	0
ENSOART00000001602.1	0.0663257	0.0743326	0	0.0999644	0.0405536	0.452471	0.470759	0.585099	0.348767	0.527108	0.0477044	0.039555	0	0.00871666	0.0183083	0.0342139	0.238665	0.0266858	0.202865	0.715065
ENSOART00000001598.1	0	0	0	0	0	0	0	0.0416455	0.0741016	0	0.0356986	0.28667	0.138668	0.4961	0.328201	4.86969	4.53799	5.57593	2.09125	4.10705
ENSOART00000001599.1	0	0	0	0	0	0	0	0	0	0	0	0.0222605	0	0	0.0312152	0	0	0.0603776	0	0
ENSOART00000001601.1	0.168033	0.225866	0.166388	0.289476	0.174795	0.0781082	0.149574	0.175589	0.170194	0.0881928	0.248176	0.276056	0.202318	0.241402	0.220226	0.135579	0.395844	0.326037	0.31925	0.332555
ENSOART00000001600.1	0	0	0	0	0	0	0	0	0	0	0	0	0	0	0	0	0	0	0	0
ENSOART00000001606.1	1.09107	0.558955	0.337753	0.592874	0.627793	1.36498	1.76057	1.48807	1.61584	1.54754	0.772476	0.969057	0.812988	0.756579	1.07743	0.450903	0.482869	0.710916	0.495099	0.351419
ENSOART00000001605.1	40.4673	23.6625	20.3016	27.1339	22.5003	30.8103	35.8849	33.9659	36.6862	33.506	42.2312	26.6805	29.4465	39.2306	30.6657	33.1709	38.2108	36.996	38.8476	44.4859
ENSOART00000001610.1	0	0	0	0	0	0	0	0	0	0	0	0	0	0	0	0	0	0	0	0
ENSOART00000001612.1	8.96812	7.15072	7.17672	8.41455	7.76669	1.68039	1.9479	3.59362	4.3925	3.52855	18.3473	18.9062	20.0296	14.1521	20.0095	6.45795	7.41426	9.51352	8.03515	7.74662
ENSOART00000001613.1	73.5565	56.6435	34.9779	45.8093	45.5107	64.1144	70.481	67.3904	70.654	71.123	71.6769	55.3049	56.6772	53.3871	59.7339	82.1672	71.8298	101.559	78.2604	85.0313
ENSOART00000001603.1	0	0	0	0	0	0	0	0	0	0	0	0	0	0	0	0	0	0	0	0
ENSOART00000001608.1	0.0441178	0	0	0	0	0	0	0	0	0	0	0	0	0	0.0213625	0	0.0140691	0	0.0377798	0
ENSOART00000001604.1	0	0	0	0	0	0	0	0	0	0	0	0	0	0	0	0	0	0	0	0
ENSOART00000001614.1	58.7603	43.8687	43.3799	41.1018	58.3185	26.347	38.4637	31.7509	41.262	38.2614	22.0801	18.2596	18.411	19.446	19.7793	28.1143	24.7727	25.9664	22.7617	21.8815
ENSOART00000001609.1	3.15063	1.37423	0.743808	0.978051	0.979186	4.09482	3.62614	3.40276	3.17942	3.03853	1.74272	2.67743	2.0625	1.80364	2.38747	4.51643	6.67762	6.94127	6.23611	9.9379
ENSOART00000001607.1	0.0879336	0.344674	0.543844	0.367221	0.0723563	0.0857247	0.758841	0.33243	0.528755	0.272892	0.215426	0.120989	0.180179	0.081185	0.604317	0.105547	0.680104	0.498109	0.986284	1.27823
ENSOART00000001611.1	11.2031	7.43448	6.91628	6.39837	9.17036	11.3254	15.5026	12.4815	13.3476	14.1534	4.77043	4.17679	4.45222	4.34172	4.28884	7.79112	8.66907	11.2051	7.90373	9.99423
ENSOART00000001624.1	0.610309	0.0176055	0.0191136	0.0379	0	14.3307	2.18156	0.10018	0.018376	0	44.2814	49.1038	37.4752	36.1579	39.3004	68.6678	76.2369	51.863	74.4218	73.477
ENSOART00000001618.1	0.0375804	0.0898068	0.0739438	0.15609	0.0744436	0.513611	0.0370158	0.10067	0.0712313	0.0912619	4.00703	5.79204	2.95791	6.21506	4.67221	24.4673	38.6625	24.2639	38.5682	42.0001
ENSOART00000001622.1	0.20581	0.0328624	0	0	0	0.0558467	0.0539198	0	0	0	0.104412	0.30116	0.241454	0.339297	0.438364	1.38306	2.28526	1.24494	2.56453	2.92395
ENSOART00000001615.1	7.47864	7.34257	5.01518	5.64578	5.55679	8.36393	10.3362	8.51702	9.48767	8.69075	3.98085	3.75975	4.12546	3.68382	4.31272	7.81062	8.12832	11.1229	7.26031	9.9124
ENSOART00000001619.1	18.3417	27.7612	19.6705	20.0451	22.3775	26.9794	25.3932	28.7368	28.3762	25.4185	32.0569	27.9479	24.9894	33.6357	31.8432	61.5315	55.424	61.1176	53.8963	59.4957
ENSOART00000001616.1	2.94113	2.64447	2.52369	2.40406	2.85758	0.00404994	0.0181239	0.0321198	0.0510645	0.0349398	2.16925	2.48587	2.10178	1.93028	2.06483	0.0750576	0.096683	0.0897099	0.103176	0.134798
ENSOART00000001625.1	10.3602	9.53475	5.76733	8.33478	7.86887	7.90033	9.57438	11.7133	11.5762	8.54422	4.84546	4.89335	4.13769	3.57014	5.34421	6.43893	6.67144	8.14033	6.611	6.97917
ENSOART00000001617.1	0.180341	1.23637	1.49777	0.817561	1.00035	0	0.0519396	0	0.302244	0.0623112	0	0.0827683	0.16284	0	0	0	0.115366	0.282412	0.20627	0.125893
ENSOART00000001621.1	0.0379372	0	0	0.0199777	0	0.295587	0.0165027	0	0	0	0.824484	1.00072	0.499183	1.25599	0.752719	2.59931	4.0406	3.93462	3.65488	2.39917
ENSOART00000001623.1	61.1078	41.2398	28.2854	33.1668	35.1148	34.3268	40.2758	57.5894	45.4933	38.9563	45.9527	28.4431	27.6951	54.206	35.254	13.9304	10.3983	10.2637	11.88	9.05747
ENSOART00000001620.1	0.236689	0.139085	0.124762	0.0247579	0.182965	0.0690181	0.184447	0.152136	0.263507	0.0989793	0.0984946	0	0.111522	0.0216479	0.0913552	0.197783	0.0598977	0.155097	0.120621	0.253904
ENSOART00000001626.1	5.81674	3.94073	3.80299	4.53472	3.52996	2.16574	2.43026	5.20382	4.2255	3.0729	9.84786	10.8322	8.89408	8.03249	7.62521	5.88105	7.28891	7.63019	6.58074	5.68596
ENSOART00000001627.1	15.0882	12.6454	9.27257	12.7167	11.3047	9.32478	11.6896	15.0459	14.0305	14.1259	19.8414	16.7806	16.455	33.1885	27.2233	37.7366	33.0975	32.6572	37.6924	44.6764
ENSOART00000001628.1	1.49375	1.05313	0.451724	0.614546	0.457374	0.732708	0.956974	0.669815	0.333523	0.205453	2.63066	2.26162	1.6789	3.45094	3.54046	2.39279	4.01867	5.14237	5.06251	7.47116
ENSOART00000001629.1	3.91239	5.71351	5.85592	6.44852	7.16385	3.89414	5.02213	5.9745	4.60684	5.58878	4.66142	3.79131	2.4857	2.42834	4.73275	1.69341	2.31704	2.63463	1.42829	3.87096
ENSOART00000001630.1	10.7905	9.50786	11.7743	13.0131	20.3118	10.9025	16.4113	10.2406	17.0039	14.368	14.5414	10.8017	11.9615	16.643	15.2859	34.2762	35.8025	28.5082	34.4112	40.5426
ENSOART00000001635.1	0	0.0172646	0	0.0185538	0	0.0686193	0.0766341	0.0225993	0	0	0.0883792	0.354666	0.0713045	0.0485933	0.102251	0.211747	0.640246	0.247968	0.52789	0.944688
ENSOART00000001639.1	3.77502	3.76973	2.74269	3.42562	4.09896	6.30481	9.68931	4.0282	7.54092	6.37735	3.47552	3.8431	3.42623	2.82913	3.74326	4.68387	6.99491	4.17747	7.2557	7.5122
ENSOART00000001631.1	0	0	0	0	0	0	0	0	0	0	0	0	0	0	0	0	0	0	0	0
ENSOART00000001636.1	0.154058	0.0838997	0.0362461	0.090171	0.0437543	1.41724	1.68344	1.93317	1.15206	0.286802	2.53445	2.28244	2.19452	3.74683	2.76578	11.8136	13.2966	12.2109	17.0923	20.0952
ENSOART00000001632.1	0.328509	0.246692	0.184216	0.270481	0.236806	1.01895	0.883432	0.606965	0.598263	0.116795	0.759841	0.79995	0.605082	0.442859	1.00355	0.756173	2.2544	3.24976	1.29565	1.55079
ENSOART00000001638.1	11.0053	9.49689	6.20678	7.16795	6.69173	9.00553	9.85417	6.60986	7.94054	8.71971	5.93531	5.77297	4.24183	5.71397	5.43786	9.9362	15.6923	10.3518	14.5592	20.8194
ENSOART00000001642.1	5.75113	5.37286	5.22916	4.65852	5.41514	4.96634	7.95054	6.2911	6.55424	5.57775	5.18629	5.36582	4.20575	4.84939	4.48766	10.408	18.4065	5.53315	21.5636	23.632
ENSOART00000001645.1	2.24372	2.45423	1.90646	2.88334	1.69694	2.91669	3.83929	1.61251	2.58092	2.99219	3.32334	2.92895	2.57968	1.94981	2.49896	9.53962	15.6886	2.66051	17.3024	19.3188
ENSOART00000001640.1	27.2454	14.2293	10.5746	14.5222	22.7946	14.2097	16.9154	19.9331	25.3559	22.5458	21.0576	15.1557	19.541	23.1782	21.46	32.1834	19.6674	25.4357	18.5531	21.0422
ENSOART00000001633.1	7.40546	6.92508	6.14578	6.56081	5.27581	7.98101	12.2979	13.1782	16.1476	12.1589	9.44503	8.4085	8.69498	7.5389	10.9827	70.5391	39.4685	80.5418	44.1526	37.8458
ENSOART00000001634.1	3.15276	2.44817	1.64259	2.30741	2.30862	2.68516	2.70503	2.13849	2.50274	2.43519	1.61641	1.78451	1.73988	1.62371	1.6483	2.39982	3.49854	3.95514	2.80142	3.72223
ENSOART00000001637.1	12.1645	8.73453	6.21904	7.52623	7.29534	9.75174	13.2779	12.3777	12.292	11.5016	6.19588	4.6535	4.34377	5.66353	4.7558	5.53347	5.66823	6.14092	6.54529	6.66758
ENSOART00000001650.1	0.575741	0.537424	0.511101	0.756601	0.643688	0.998706	1.23795	0.910016	1.00545	0.595994	0.996885	0.924243	0.919006	0.791794	1.04176	0.937286	1.24066	1.3932	1.07577	1.6109
ENSOART00000001649.1	1.61309e-09	0	8.39414e-10	3.11655e-10	4.53131e-10	0	0	0	0	0	0.0665974	0.0568837	0.0249101	0	0	0.0320554	0.0532636	0.0514357	0.0281516	0.0871138
ENSOART00000001652.1	0.0535611	0.0331026	0.027886	0.0153667	0.0340555	0.123183	0.081285	0.121932	0.170827	0.0593544	0.644669	0.885005	0.76518	0.605083	0.813951	1.40049	1.456	1.40958	1.41238	1.86998
ENSOART00000001646.1	0	0	0	0	0	0.0370393	0.0165432	0	0	0	1.7993	1.18898	1.43391	11.2268	5.71507	47.4413	12.3447	29.1502	22.5524	26.7147
ENSOART00000001641.1	12.2767	7.58078	5.7844	4.80252	5.50429	10.6068	13.0342	9.96594	10.5461	9.72229	2.59033	4.33405	4.0052	3.20128	4.16707	7.93636	9.33017	7.40492	8.73376	8.63844
ENSOART00000001643.1	0	0.0140677	0	0	0	0.432607	1.32051	1.07296	3.24658	0.839465	1.97022	3.48069	0.714949	2.68658	2.27186	84.1152	82.93	99.8756	62.4407	69.9756
ENSOART00000001644.1	293.209	162.352	203.444	223.13	249.19	194.063	214.183	198.69	256.764	275.495	154.729	109.09	136.755	160.701	155.875	283.003	255.863	207.799	241.518	251.834
ENSOART00000001647.1	9.10464	17.041	7.7441	12.2707	9.9966	22.9119	27.3986	25.3864	25.8719	30.8247	3.03364	3.61559	3.6192	3.34092	3.9161	9.64075	12.9379	12.381	10.1486	15.9224
ENSOART00000001648.1	160.468	167.831	138.078	167.031	168.081	205.678	212.148	273.283	282.87	262.527	234.107	238.542	167.53	240.287	172.257	755.25	863.699	595	983.681	748.532
ENSOART00000001654.1	4.89211	4.70963	4.03304	4.21944	4.17826	6.75125	7.54152	7.89087	8.76022	7.73018	4.1414	3.78689	3.23239	3.47206	3.5114	7.01878	7.36985	7.93052	7.13203	8.26489
ENSOART00000001651.1	0	0	0	0	0	0	0	0	0	0	0.844907	1.57617	0.314505	1.61295	1.83363	5.69382	8.59392	7.61431	6.94824	8.53591
ENSOART00000001653.1	0	0	0	0	0	0	0.184048	0.552342	0.210073	0	0.845161	0.728155	2.73963	1.56459	5.44685	4.80125	13.8958	19.3427	7.96242	27.5429
ENSOART00000001656.1	25.9947	40.2569	44.3531	43.7996	49.8878	34.1764	38.6145	43.6276	51.209	43.6338	29.4302	28.755	22.5274	26.7789	25.9281	55.6919	60.1989	55.3877	55.3498	60.195
ENSOART00000001663.1	0.554297	0.464685	0.852438	0.657467	0.632448	0.532615	1.01238	0.591814	0.480608	0.351837	1.27561	1.69975	1.41751	1.52081	1.3887	2.48399	3.74781	3.7769	3.04075	3.78813
ENSOART00000001665.1	28.0927	17.0599	10.9561	14.3954	13.5681	19.7204	27.6306	24.9604	26.4319	24.9112	26.9425	22.268	19.2906	31.4519	22.0819	62.2452	63.4928	67.5025	64.9772	61.3208
ENSOART00000001660.1	0.942771	0.153854	0.0811714	0	0.129836	0.153113	0	0	0	0.0813439	5.21326	3.13419	3.74447	2.89536	2.31006	1.50691	2.06986	1.62983	2.23222	1.79952
ENSOART00000001655.1	12.0866	9.98706	7.2489	8.55328	8.84309	9.56992	11.263	12.7069	11.5021	13.532	3.96603	3.01073	3.12037	3.63996	3.48285	8.2705	9.51835	7.29009	8.45189	9.64696
ENSOART00000001657.1	0.0880273	0.241961	0.16402	0	0	0	0	0.0941914	0.280743	0	0.41793	0.364667	0.156451	0.231562	0.175938	0.551703	0.307925	0.569584	0.153055	0.647002
ENSOART00000001658.1	1.17717	1.26625	1.34362	1.20947	1.82578	1.14089	1.85467	1.64728	2.21185	1.29639	1.36762	0.859222	1.00312	0.810925	1.57504	0.864699	2.57221	2.31009	1.5088	2.69249
ENSOART00000001659.1	0	0	0	0	0	0	0	0	0	0	0.0698538	0.392498	0.160869	0.169167	0.139989	0	0.249562	0.130994	0.31897	0.54065
ENSOART00000001666.1	2.78768	1.97446	1.74823	1.16883	1.36704	0.667384	1.07694	1.52793	0.86674	0.490367	3.5874	1.80588	1.94042	4.69155	4.62883	10.0199	10.9182	13.6816	6.64801	9.96751
ENSOART00000001662.1	0	0	0	0	0	0	0	0	0	0	0	0	0	0	0	0	0	0	0	0
ENSOART00000001661.1	1.67745	1.96777	2.32822	2.86411	2.96914	1.15935	1.46733	1.03086	1.00361	1.09551	3.95708	3.65808	4.6521	4.06871	3.44025	1.60097	2.28618	2.69896	1.56282	3.1623
ENSOART00000001664.1	0	0.0796727	0	0.151488	0.0679231	0	0	0	0	0	0.0569722	0	0.0501712	0.057778	0.172703	0	0.136949	0.0650781	0	0
ENSOART00000001667.1	0.0949682	0.329036	0.51804	0.39941	0.832583	0.145399	0.106343	0.104585	0.0277038	0.0853347	2.21349	3.08362	1.3389	2.19829	2.96757	2.36644	4.77973	4.1601	5.0773	4.2311
ENSOART00000001668.1	36.8716	25.6215	22.2601	26.2768	36.8648	35.0874	42.6826	34.6104	51.1263	47.2495	18.9559	15.8214	19.2778	20.3004	23.8973	42.429	43.6507	37.7166	37.3422	46.6319
ENSOART00000001670.1	0.27643	0.376097	0.056892	0.244465	0.129675	36.9829	35.3143	35.0642	37.8316	29.6922	0.332162	0.248951	0.259961	0.189372	0.354757	20.2668	16.1176	2.98565	15.1059	2.25672
ENSOART00000001669.1	10.903	4.92986	0.7985	1.87998	1.351	15.3105	37.9696	45.8118	32.0414	26.8268	10.131	12.1373	15.7924	9.34925	12.9401	7.39773	8.13015	7.73711	7.79631	7.4668
ENSOART00000001672.1	22.8563	14.1306	11.1056	13.1785	14.6154	20.2587	24.422	16.4179	20.1516	15.1701	12.1528	13.2534	12.3201	12.7483	14.0521	21.1991	35.9559	32.6332	32.3723	38.2583
ENSOART00000001673.1	0.0257602	0	0	0	0.0110026	0.0250992	0	0	0	0	0.410131	0.993912	0.295468	0.40282	0.161873	0.650816	0.825493	0.749635	1.1251	0.886864
ENSOART00000001678.1	0.0425746	0.0512759	0	0	0.0449991	0.101938	0.106784	0	0.0906267	0.0535746	0.0428246	0.113646	0.0352556	0.063505	0.100809	0.19208	0.309281	0.230052	0.183632	0.566104
ENSOART00000001679.1	0.0359153	0.035817	0	0.0535194	0.00920602	0.0587945	0	0.0489244	0.017068	0	2.04512e-06	0	0.0417989	0.0378078	0.0218616	0.0972365	0	0	0	0.00751618
ENSOART00000001680.1	23.1134	28.33	28.9865	32.9731	29.6496	31.1153	62.5326	84.7674	88.6884	63.7047	8.58464	8.32155	8.0717	7.85815	10.7843	23.4124	24.1172	21.4827	19.0728	26.2401
ENSOART00000001671.1	0	0	0	0	0	0	0	0.0172996	0	0.0282307	0.0112798	0.00935898	0.00908451	0	0	0	0	0	0	0
ENSOART00000001675.1	0.00804888	0	0	0	0.00689585	0.517764	0.0140355	0	0.041169	0	1.07451	1.3109	1.05345	1.53283	1.29828	3.85658	3.70828	3.85386	2.7504	3.36985
ENSOART00000001676.1	22.1116	27.9554	18.8352	19.5814	21.1284	28.1673	32.5691	26.8012	28.8984	29.9193	10.7465	10.9897	11.3386	11.4766	11.1223	19.1856	27.6994	18.1312	27.5701	29.6849
ENSOART00000001677.1	0	0	0	0	0	0	0	0	0	0	0	0	0	0	0	0	0	0	0	0.548847
ENSOART00000001674.1	0	0	0	0	0	0	0	0	0	0	0	0	0	0	0	0	0	0	0	0
ENSOART00000001684.1	7.00231	5.66426	3.2119	4.7562	4.28412	4.62681	7.65065	5.06405	4.91669	5.82157	5.02827	4.46621	4.21259	4.17652	4.75848	5.80151	7.80772	8.51454	6.88658	10.3884
ENSOART00000001681.1	0.0124708	0	0.0132348	0.105198	0.0213112	0.0607556	0.282454	0.096169	0.0509506	0.130778	0.857039	0.806355	1.04334	0.688279	0.72331	0.615166	0.906619	1.33457	0.897115	0.858896
ENSOART00000001693.1	0.598808	0.69904	0.414436	0.597373	0.277608	0.622201	1.167	1.48468	0.983108	1.08072	0.570601	0.484816	0.458654	0.35335	0.432692	0.588099	0.734343	1.17174	0.907039	1.26943
ENSOART00000001695.1	34.8448	28.4939	19.7128	24.1266	25.0004	44.2214	49.0476	36.506	43.016	40.7253	19.4649	18.8492	20.6343	22.7045	21.9543	33.0099	35.8532	43.1857	35.9727	38.5875
ENSOART00000001683.1	57.6615	35.8813	29.302	28.3306	31.8931	38.7861	45.7926	45.0079	43.9329	48.8192	19.8689	13.7728	13.8834	17.8226	16.1202	33.5379	32.8567	23.8328	35.1606	37.8132
ENSOART00000001707.1	47.8871	40.5777	18.734	27.7622	29.4536	45.8253	44.1347	35.9771	42.5821	42.5693	19.9408	18.8199	19.4056	20.2945	18.9397	31.5035	45.1036	37.3035	41.3787	54.5624
ENSOART00000001687.1	0.299638	0.14851	0.11861	0.183214	0.0970681	0.304091	0.259435	0.223744	0.259809	0.151694	8.47863	14.4138	10.1996	21.3859	16.2441	36.8961	41.1325	34.0646	48.5057	45.0068
ENSOART00000001682.1	0	0	0	0	0	0	0	0	0	0	0	0	0	0.0537436	0	0	0.018694	0	0	0
ENSOART00000001685.1	22.2643	19.4274	14.2903	15.8471	15.4033	27.26	49.0561	28.6669	35.3331	30.3723	8.14657	5.41272	7.62877	7.91786	8.09534	10.9534	11.9975	11.8412	14.2351	16.2479
ENSOART00000001690.1	5.96054	5.18565	4.4597	5.24209	6.22105	7.1884	12.1516	7.45735	10.2808	6.72511	10.1456	8.42469	8.14199	8.9771	6.74155	51.3328	35.3627	56.9287	32.8242	29.0531
ENSOART00000001686.1	66.4875	38.5518	31.4274	36.1088	38.1498	53.0226	65.1073	58.2064	60.1915	65.0932	17.3342	12.9628	13.2068	15.5076	15.8537	30.1398	30.2453	21.7071	34.6532	35.8353
ENSOART00000001692.1	0.601347	0.370198	0.237281	0.191648	0.298456	0.231623	0.401901	0.089827	0.199871	0.161245	0.128847	0.116634	0.17928	0.167223	0.216361	0.269152	0.655508	0.196913	0.934159	1.11263
ENSOART00000001688.1	43.2066	53.0363	41.7011	54.0986	56.4296	63.1048	77.6375	72.9457	57.8735	65.4464	41.6004	22.3185	26.2034	26.5336	22.5571	17.0391	17.8822	21.6995	20.3395	24.5094
ENSOART00000001689.1	0.165095	0.0538256	0.057644	0.0868748	0.151106	0.215698	0.144348	0.105587	0.222095	0.0428297	1.23085	1.37367	0.9029	1.54504	1.39396	4.0352	4.90548	5.27591	3.52121	3.08996
ENSOART00000001698.1	21.3738	26.9587	29.0759	32.602	34.7684	11.0515	58.109	24.7882	26.7937	21.4273	27.5092	26.4091	25.7919	22.2279	30.0369	15.04	21.1897	13.9959	21.8045	22.8731
ENSOART00000001691.1	0	0	0	0	0	0	0	0.015675	0.0124571	0.0127896	0	0	0	0	0	0	0.0233305	0	0.0835497	0.0787536
ENSOART00000001694.1	3.07025	2.94047	1.97729	2.38277	2.12985	4.67473	6.68096	6.64462	5.76289	5.48945	5.99609	5.21207	4.39354	5.09297	5.40444	13.5345	14.4438	15.6316	12.8981	11.759
ENSOART00000001696.1	0	0	0	0	0	1.04431	1.46854	0.907186	13.1752	9.61613	2.37588	4.04379	1.44742	11.3273	9.26744	115.527	92.8341	78.5903	45.7587	67.0805
ENSOART00000001697.1	11.5927	3.85189	3.06857	4.32095	7.66631	10.2122	10.7506	5.23418	11.2981	11.2098	3.41112	3.72572	5.08183	6.43336	5.76749	11.3085	18.2887	9.83076	14.9072	22.5929
ENSOART00000001699.1	19.5469	9.69448	7.61637	8.07911	11.4628	18.1808	21.2932	11.3955	21.69	17.9945	7.46116	7.07366	8.02617	9.28221	9.54054	15.5252	26.8177	15.4873	24.4508	32.8443
ENSOART00000001701.1	0	0	0	0	0	0	0	0	0	0	0	0	0	0	0	0	0	0	0	0
ENSOART00000001700.1	36.2756	36.2524	22.7014	25.49	20.7097	18.1616	18.3834	14.7722	14.926	15.8756	35.0058	19.1542	29.584	15.0634	27.1584	25.5376	46.2966	9.62601	62.6069	59.4293
ENSOART00000001712.1	6.82186	4.20269	3.26991	4.20628	4.15851	7.49654	10.0301	6.21366	7.2633	6.04163	6.52026	8.71516	6.80366	6.85106	7.6764	14.3395	24.1439	17.2221	21.0174	25.8568
ENSOART00000001702.1	19.4108	13.236	12.0732	15.9455	23.4897	15.9292	11.0361	19.2481	29.9093	20.8092	8.01392	4.57201	8.32534	8.31324	8.53747	145.539	73.3148	139.971	72.1229	63.1
ENSOART00000001703.1	7.69264	10.6419	12.0381	12.9034	12.5534	15.2827	21.0142	15.3984	15.4791	9.89073	12.8329	16.0016	17.4807	14.2764	14.4158	3.80431	10.9714	14.2207	11.1267	15.1034
ENSOART00000001704.1	7.04519	2.96262	0.374971	0.959994	1.0033	10.3361	25.0717	26.8714	22.4609	19.4574	5.60918	7.75233	9.48472	5.59704	7.7723	3.14791	4.24015	3.69712	4.02163	5.22277
ENSOART00000001706.1	0.41885	0.389798	0.351319	0.419662	0.402866	0.482106	0.636189	0.422661	0.401574	0.256342	2.94202	2.52264	1.73011	4.89132	4.14091	8.05056	5.22032	4.7647	8.85236	9.06041
ENSOART00000001705.1	0	0	0	0	0	0.319856	0	0.0434735	0	0	9.21361	11.2376	3.48918	14.4627	10.5157	66.9951	68.8368	66.8251	54.3032	71.5202
ENSOART00000001711.1	5.4924	5.56995	4.75379	6.48582	9.28314	6.75845	8.34759	4.98142	9.56659	7.22558	9.15213	7.7692	10.1594	9.07066	9.37063	4.02181	4.58704	6.48346	3.84407	5.01089
ENSOART00000001708.1	9.87888	8.78321	9.89209	6.74281	26.3741	11.9419	8.98663	14.0754	27.8695	21.6222	5.02773	4.44937	4.44252	6.629	9.03095	19.9682	8.36563	13.5282	5.90505	10.2664
ENSOART00000001710.1	17.893	24.2723	11.0516	16.7737	1.21044	11.6828	24.2091	25.4358	4.91332	4.00346	12.2949	12.2823	9.63812	8.39935	8.55151	3.569	10.2037	11.3842	9.83901	8.71285
ENSOART00000001709.1	0.00755266	0.00740703	0	0.00797101	0	0.0220845	0.0131715	0	0	0.00793224	0.0253702	0.0315443	0.0152859	0.0277943	0.0510591	0.0454657	0.0553852	0.120544	0.0323414	0.0489132
ENSOART00000001713.1	0.168586	0.297271	0.31861	0.247886	0.426633	0	0	0	0.136725	0.035133	0.420275	0.536394	0.18208	0.650886	0.261799	0.121336	0.828151	0.0316385	0.375363	0.214889
ENSOART00000001717.1	0.0156447	0	0	0	0	1.57702	1.86939	1.30306	1.91454	1.50232	0.0153154	0.0122014	0.0370956	0.00633503	0.030884	1.77189	1.48942	3.59426	0.963821	0.878543
ENSOART00000001719.1	22.3851	18.9404	10.2967	14.8592	18.317	6.30643	7.85439	8.94372	10.9798	8.70981	25.3558	21.919	23.29	19.4439	30.3911	18.9801	32.1611	21.2127	28.131	47.1319
ENSOART00000001714.1	0.20371	0	0	0	0	0.0994469	0	0	0	0	0.166289	0.0701849	0.280045	0.282983	0	1.34784	0.69163	0.0964526	1.32433	1.89976
ENSOART00000001715.1	0.0313893	0.0307498	0	0	0	0.122181	0.0272413	0	0	0	0.0261057	0	0	0.028854	0	0.0376616	0.0100113	0.0294527	0.0806344	0.13357
ENSOART00000001718.1	0	0	0	0	0	0	0	0	0	0	0.23063	0.1066	0.0207906	0.169903	0	0.0739264	0.0196494	0	0	0.0655643
ENSOART00000001716.1	39.4454	31.0165	22.4706	23.8976	23.4858	20.435	23.0724	22.902	23.592	26.5373	18.7488	16.4294	14.8721	17.047	16.4884	21.2018	23.0002	17.0977	25.6183	24.0439
ENSOART00000001720.1	0	0	0	0	0	0	0	0	0	0	0	0	0	0	0	0	0	0	0	0
ENSOART00000001721.1	0	0	0	0	0	0	0	0	0	0	0	0.110389	0	0.0586613	0	0	0	0	0	0.0678682
ENSOART00000001723.1	0	0	0	0	0	0	0	0	0	0	0	0	0	0	0	0	0	0	0	0
ENSOART00000001724.1	0	0	0	0	0	0	0	0	0	0	0	0	0	0	0	0	0	0.0404646	0	0
ENSOART00000001733.1	6.33559	3.17851	1.3763	2.46069	2.18542	4.07163	3.36965	3.27237	3.19235	3.3157	2.58142	2.12755	1.48673	1.93439	2.52809	1.38154	2.38308	3.27567	1.87154	3.58417
ENSOART00000001726.1	22.4799	9.30829	4.19382	5.33761	3.90236	7.35599	3.04976	4.00747	3.30648	3.66836	32.1575	20.7314	23.592	17.7983	25.4857	16.3984	17.174	16.3224	20.2801	24.3374
ENSOART00000001722.1	0	0	0	0	0	0	0	0	0	0	0	0	0	0	0.384522	0	0	0	0	0
ENSOART00000001727.1	0	0	0	0	0	0	0	0	0	0	0	0	0	0	0	0	0	0	0	0
ENSOART00000001729.1	0	0	0	0	0	0	0	0	0	0	0	0	0	0	0	0	0	0	0	0
ENSOART00000001734.1	0	0	0	0	0	0	0	0	0	0	0	0	0	0	0	0	0	0	0	0
ENSOART00000001725.1	0.192947	0.0694261	0.0754595	0.0373765	0.0638461	0.162163	0.16368	0.250874	0.130533	0.11164	0.529742	0.488394	0.332611	0.427466	0.406613	0.551226	0.585503	0.570386	0.483519	0.526959
ENSOART00000001728.1	0.00335254	0	0	0	0	0	0	0	0	0	0.583225	0.595132	0.703177	0.378792	0.66982	0.495489	0.21471	0.364265	0.537184	0.426825
ENSOART00000001731.1	10.7234	5.23673	5.20471	5.80043	7.58436	9.07469	10.635	8.39966	12.6152	12.9556	4.33514	3.24178	3.87858	4.17993	5.37948	7.00133	8.06088	5.72353	7.57942	9.88701
ENSOART00000001730.1	141.201	82.5549	62.4811	70.7369	74.3018	132.775	116.433	150.605	129.444	163.504	44.1305	36.85	39.0986	37.6652	46.5783	54.0943	70.5647	59.3613	64.6219	72.3612
ENSOART00000001732.1	0	0	0	0	0	0	0	0	0	0	0	0	0	0	0	0	0.0276718	0	0	0
ENSOART00000001735.1	16.9329	9.88832	9.897	10.1484	12.3301	12.8837	15.2063	11.1697	13.5056	11.5422	16.9463	18.0748	16.2381	14.7398	17.3554	32.9258	33.9552	35.204	33.0544	37.1414
ENSOART00000001740.1	17.497	9.00017	4.7461	5.4097	5.93706	7.52196	8.88176	8.97176	8.37673	9.26986	5.75525	5.26525	4.43035	4.03818	5.23448	5.60792	8.20584	5.80153	8.5052	9.67533
ENSOART00000001743.1	0.197699	0	0	0.136663	0	0	0	0	0	0	0.299926	0	0.0870791	0	0	0.311723	0.109747	0	0	0
ENSOART00000001736.1	0	0.0339203	0	0	0	0	0	0.0441993	0	0	0	0	0.0233752	0	0	0.0415307	0.0110448	0	0	0.0735149
ENSOART00000001742.1	2.64651	3.04754	2.04032	2.3814	6.63092	3.05411	2.53563	2.09411	4.18634	4.58563	2.45472	1.7011	1.98861	2.58361	2.4068	4.19299	3.08027	2.6627	1.93914	3.25887
ENSOART00000001737.1	0.507385	0.480117	0.231529	0.172365	0.155844	0.246994	0.378928	0.371863	0.334913	0.285347	0.213917	0.164581	0.194978	0.233795	0.227279	0.0871335	0.242172	0.118808	0.0464281	0.424477
ENSOART00000001739.1	3.65631	2.49865	2.07549	2.13674	2.21926	2.33855	3.50695	2.82105	2.76793	2.47317	3.03501	3.02675	2.42384	2.53582	2.93804	4.7755	5.38482	5.32459	5.05589	5.43912
ENSOART00000001738.1	0	0	0	0.137311	0	0.256952	0	0	0	0.135926	0	0.181153	0	0	0.261439	0.158422	0.171285	0	0.229631	1.08498
ENSOART00000001750.1	6.21045	3.93387	3.3616	5.78818	5.21044	3.33388	7.65524	10.5525	9.38522	6.65739	4.48403	3.69215	4.7339	2.72258	4.52518	2.60575	3.09819	3.63476	3.17202	3.2983
ENSOART00000001741.1	24.7772	23.011	18.7203	19.1999	19.9302	26.8808	27.3102	25.1087	27.8117	29.511	13.5951	11.9594	11.554	11.54	13.2496	19.71	24.2788	19.7105	21.4304	26.4582
ENSOART00000001748.1	2.77165	2.69536	2.58045	2.69116	2.58549	2.01515	2.9452	2.5484	2.88556	2.89049	2.98609	2.35863	1.83265	2.03512	2.4179	3.55263	3.76922	3.49949	3.26557	4.48452
ENSOART00000001754.1	26.3843	18.8612	14.509	13.6489	15.3542	21.461	20.4081	19.9635	18.3611	22.2099	7.11933	6.83249	6.07413	5.70699	6.03304	6.43189	10.3743	2.56421	10.319	11.7062
ENSOART00000001747.1	1.10199	0.817972	0.788801	0.743482	0.872563	1.44977	1.32986	1.02945	1.14194	1.08154	2.13285	3.04932	2.38606	2.97038	2.61701	9.95722	21.0632	5.98242	24.5454	28.9491
ENSOART00000001753.1	11.5154	9.47972	5.22822	7.47783	7.54765	10.5062	11.6193	7.4564	9.20406	10.0495	6.11006	5.84963	5.97283	6.01556	6.44905	6.90318	11.4413	9.4423	11.1211	14.7193
ENSOART00000001744.1	14.5574	4.51906	4.62379	4.71377	4.6049	3.90185	6.74637	3.73861	4.52735	4.74071	4.09475	4.70149	4.22272	3.62566	4.69896	9.19646	10.7731	9.39798	10.7521	14.2282
ENSOART00000001745.1	1.08526	1.1725	0.770841	0.86438	0.843319	26.1237	25.1629	22.4787	25.5705	16.2507	2.71856	1.96053	1.96912	2.6545	1.96492	9.33802	8.58665	11.8104	10.206	7.85133
ENSOART00000001759.1	0.0853983	0.103709	0.086688	0.0644186	0.0838203	0	0	0	0	0	0.102752	0.133302	0.0603527	0.0710942	0.0745715	0.00489844	0.0181511	0.00763647	0.00348281	0.00879763
ENSOART00000001746.1	0.0627596	0.0492281	0	0.0529405	0.0536219	0.354673	0.634178	0.629149	0.538446	0.421201	0.231425	0.383975	0.262532	0.173189	0.254809	0.437943	0.356202	0.447751	0.257986	0.189096
ENSOART00000001752.1	14.3809	13.0845	9.87117	12.6396	10.9032	3.37802	4.67933	3.7077	4.04093	3.25065	14.272	15.0306	11.4164	12.7608	19.0548	7.64554	13.0335	12.4855	11.7	20.0474
ENSOART00000001755.1	26.6021	25.0148	25.7813	31.4666	32.2699	13.7417	12.0891	16.4336	20.296	19.6165	13.9396	12.0426	10.7264	13.4199	14.1529	25.5754	17.3276	32.8694	16.7226	14.4177
ENSOART00000001749.1	0.282063	0	0.288878	0.298538	0.68522	1.65854	1.47012	0.352975	2.57983	1.77265	1.82098	1.38583	1.63476	1.32521	2.59209	1.03721	0.574548	2.76167	0.255959	0.585151
ENSOART00000001751.1	0	0	0	0	0	0	0	0	0	0	0	0	0	0	0	0	0	0	0	0
ENSOART00000001756.1	42.7154	37.6695	26.8315	33.7844	32.3638	35.7195	49.7107	47.862	48.7836	45.3325	39.3968	29.821	33.1471	34.8018	36.8871	45.4736	44.2048	44.4457	40.1281	37.2879
ENSOART00000001757.1	0.786533	0.85204	0.721845	0.675566	0.563119	0.947349	1.4221	0.716392	0.906466	0.736135	0.570538	0.718097	0.544717	0.45681	1.10218	0.820843	2.25738	0.815904	2.02064	3.32438
ENSOART00000001760.1	9.60832	6.79206	4.47424	5.35922	5.56212	8.73884	11.4096	11.5458	13.3922	10.6163	4.65268	6.98498	5.09812	5.57292	5.26689	30.442	31.2384	28.7724	29.3069	32.7693
ENSOART00000001758.1	0.782381	2.14434	2.17092	2.16845	2.37053	0.586637	0.434886	0.362208	0.475868	0.345875	3.18629	3.78467	2.53603	4.55789	3.31125	1.47228	1.35018	1.90181	0.947626	0.725691
ENSOART00000001762.1	10.404	11.7785	5.59964	9.9183	8.87673	7.09337	10.0062	11.049	11.5618	9.34355	3.66042	3.36553	2.27092	4.32953	5.28103	8.46456	9.59494	14.1693	7.98614	8.10967
ENSOART00000001765.1	0.577222	0.662948	0.418419	0.518859	0.567405	0.341511	1.07145	1.61463	2.08488	1.25791	0.647575	0.359597	0.135374	0.780894	0.400315	1.75778	1.23018	2.81581	0.925093	1.41792
ENSOART00000001761.1	0.0341303	0	0	0	0	0	0	0	0	0	0	0	0	0	0	0.123856	0.0873631	0.0321624	0.11734	0.0743076
ENSOART00000001777.1	0	0	0	0	0	0.28129	0.0638272	0.0104739	0.566154	0.183719	0.00341751	0	0	0	0	68.8966	40.0787	143.911	43.2237	52.1566
ENSOART00000001763.1	0.0182942	0.0179324	0	0.0192698	0.0311524	0.160363	0.0955083	0.0234692	0.0372955	0	1.37663	1.72737	1.11099	0.908522	1.59336	7.8073	13.3941	7.5724	13.9901	12.3195
ENSOART00000001766.1	1828.67	1848.35	1834.33	1773.29	1648.72	1994.08	1479.78	1857.49	1551.81	1709.8	582.966	527.048	513.685	566.816	470.218	861.534	1071.28	792.94	987.664	1054.35
ENSOART00000001764.1	0	0	0	0	0	0.0529281	0	0	0	0	0.203847	0.339029	0.0183482	0.899832	0.105419	8.03012	12.1389	15.6138	11.1981	11.7145
ENSOART00000001780.1	7.57226e-06	0	0	0	0	0.0330975	0	0	0	0	0.113244	0.0944902	0.0230189	0.03131	0.13253	0.243346	0.224233	0.127424	0.0574317	0.0701742
ENSOART00000001767.1	112.798	76.9529	48.1913	59.5301	58.7503	78.6381	88.9757	102.343	101.658	107.146	37.2016	34.1	38.6431	42.8669	36.3795	81.8897	133.81	56.9712	147.189	130.642
ENSOART00000001770.1	3.63845	3.14819	1.72626	2.75062	2.11782	5.06999	3.49794	3.3715	4.00247	3.14874	2.47588	2.70345	2.2095	2.48801	2.44829	19.3473	13.6147	27.827	16.609	12.8436
ENSOART00000001768.1	0	0	0.0635272	0.0634873	0.0255306	0.0293922	0	0.0385993	0.0306524	0	0.0251303	0.167247	0.0611508	0.0277637	0.0585872	0.0724934	0.211913	0.113357	0.0258616	0.25722
ENSOART00000001771.1	54.8386	44.7292	31.6209	41.0602	47.3877	49.2608	56.1988	41.0278	53.435	48.2895	16.8479	12.5821	14.2576	16.151	15.0681	38.4988	29.406	41.9928	29.7936	31.5652
ENSOART00000001769.1	0	0	0	0	0	0.223809	0.313597	0.293723	0.3665	0.346246	6.83966	10.1941	3.34891	8.48725	7.90719	71.3868	74.4371	79.6716	46.0416	55.6283
ENSOART00000001774.1	1.11628	1.18243	0.654016	0.769908	0.950199	1.37802	1.58799	1.27281	1.3333	1.14816	1.7912	2.01949	1.71602	1.72926	2.14442	2.74118	2.70519	3.16102	2.19103	3.14318
ENSOART00000001773.1	13.2835	9.45334	5.1625	6.56919	6.90369	8.95999	11.478	9.62436	11.1143	11.3489	5.8294	5.69398	5.70938	6.67161	7.55739	10.5738	15.4062	12.3876	10.4877	24.046
ENSOART00000001772.1	1.26252	0.925226	1.08673	0.822197	0.851815	2.49726	3.30407	2.04114	2.23959	2.74401	2.14688	1.96951	1.71924	1.36286	1.54623	2.63955	3.18486	2.96821	2.94106	3.80615
ENSOART00000001775.1	0	0.148349	0.772684	0.315727	0.856862	0.737533	0.913665	1.89283	0.302597	0.156364	14.2183	11.1866	8.99372	7.17217	10.0849	28.3131	31.3923	25.7775	28.7099	24.9536
ENSOART00000001781.1	0.0903003	0.0884969	0.0238347	0.0475208	0	1.23095	0.098131	0.115687	0.137863	0.212406	6.89631	9.06545	3.16869	6.18596	5.99087	73.5016	57.1833	70.658	50.4368	52.0073
ENSOART00000001776.1	4.95925	4.28863	3.32431	4.08166	3.98461	3.18796	4.21475	3.42914	3.96798	3.84733	1.95583	1.85559	1.53229	1.79679	1.03387	1.68653	1.63462	1.84944	1.85894	2.3658
ENSOART00000001778.1	18.7471	13.9733	8.0102	9.84092	11.1875	13.4156	13.7626	14.7818	15.9049	14.6253	7.06562	6.01652	4.88921	6.02759	7.10914	10.6678	11.4996	11.1015	11.6342	15.7631
ENSOART00000001779.1	15.119	10.1669	6.30142	9.06407	7.99661	11.2875	13.0569	10.4163	12.8306	12.7606	7.52371	7.64887	6.98574	6.89358	8.51891	9.41225	13.3123	14.3869	12.7313	19.108
ENSOART00000001784.1	30.8863	17.4107	14.3631	16.6609	26.7869	29.3121	34.9107	27.3531	39.6992	35.4574	17.9316	16.5698	19.1352	23.6976	23.3555	64.8201	73.7888	62.138	66.5041	83.2222
ENSOART00000001782.1	0.0463311	0	0.0482876	0	0	0	0	0	0	0	0.0393013	0	0	0.0933096	0	0	0.0534456	0	0.118773	0
ENSOART00000001783.1	0.351421	0.137574	0	0.293709	0.291355	0.273925	0.0606749	0.0889313	0.0705353	0.0727832	0.230853	0.628398	0.381873	0.323516	0.41239	1.178	1.55434	0.92601	2.77903	1.17315
ENSOART00000001785.1	0.147924	0.204429	0.122856	0.246573	0.233542	0.325382	0.399372	0.173053	0.229327	0.20846	0.723215	0.734259	0.516807	0.43712	0.584298	0.568577	0.967726	0.915591	0.478247	0.667421
ENSOART00000001786.1	2.1419	0.471879	0.501299	1.68103	1.6081	0.468709	0.231398	0.27158	0.916507	0.499745	28.6765	16.0082	26.3554	34.7375	29.7295	0.384615	0.205186	0.753874	0.320995	0.224995
ENSOART00000001821.1	0	0	0	0	0	0.134569	0	0	0	0.00259248	0.866931	1.77611	0.869507	1.89819	1.26505	5.55867	11.4513	4.36909	7.4363	14.3941
ENSOART00000001787.1	0	0	0	0	0	0.097936	0	0	0	0	7.98936	9.22148	8.82563	6.08152	8.40767	19.2707	26.6283	20.1795	28.2341	31.0995
ENSOART00000001789.1	5.49771	2.4765	1.59271	1.91843	1.89893	4.74309	4.41408	3.26769	3.28444	3.78223	1.54188	1.85973	1.51221	1.60502	2.14642	2.37793	3.88885	2.86078	2.94514	3.1145
ENSOART00000001791.1	3.80721	2.2881	1.44568	2.42056	2.08043	2.02378	2.38779	2.32958	3.24532	4.13592	1.277	0.774844	0.518293	1.17646	1.17958	0.959672	1.85732	1.74128	2.38363	2.72208
ENSOART00000001790.1	0.70907	0.205286	0.234645	0.405791	0.514382	2.75593	3.90594	1.12842	2.9228	2.51509	0.870575	0.642498	0.890509	0.500918	0.847256	2.19447	6.88826	1.63213	6.67144	10.5989
ENSOART00000001792.1	0.649161	0.474667	0.348797	1.3373	1.36567	6.70095	6.11899	3.8987	7.34896	5.01074	1.85212	1.82101	1.78594	1.33459	2.5033	7.84139	13.3813	5.40887	14.3332	19.5545
ENSOART00000001788.1	0.0129183	0	0	0.00681829	0	0.00629614	0.118303	0.00831757	0.0264449	0	0.206214	0.179896	0.15687	0.112912	0.106025	0.186667	0.366568	0.175865	0.271059	0.404641
ENSOART00000001801.1	6.30573	2.90319	3.10103	3.82161	2.16956	15.4774	5.48852	6.83376	2.9696	3.17141	2.8676	2.29963	3.12092	2.49424	1.40035	0.940273	0.769279	1.56169	1.39632	1.17869
ENSOART00000001803.1	0.387766	0.0518331	0.0373125	0.0557037	0.0900788	1.83696	1.28843	1.49269	1.13214	1.31026	0.398007	0.171348	0.535191	0.389042	0.375208	0.0423815	0.0281024	0.115807	0.135846	0.18908
ENSOART00000001795.1	36.9388	29.3869	20.8246	26.2788	28.9043	24.7674	32.9226	27.0051	30.5315	31.1328	13.5072	10.8549	11.4439	12.8264	12.2235	19.9906	24.0158	21.3274	23.9544	26.3922
ENSOART00000001799.1	0	0	0.0276448	0	0	0.229826	0	0	0.0266659	0	0.830781	1.34514	0.796654	2.62889	1.55089	3.11855	4.22483	4.35725	3.63906	5.09492
ENSOART00000001793.1	1.7712	1.31895	0.615407	0.879563	0.852886	5.96436	5.06124	10.4516	7.15856	6.15524	1.40214	1.19056	0.766558	0.824807	0.740879	28.8963	17.0841	29.5568	19.9583	16.8259
ENSOART00000001797.1	6.98037	4.58909	2.87343	2.41899	3.59431	15.1068	10.8876	23.4603	21.6893	14.9504	3.95785	3.71466	2.79455	2.81282	3.12875	57.864	33.1114	55.4379	39.4616	37.4497
ENSOART00000001798.1	0.60427	0.230207	0.422997	0.775702	0.198266	0.0979996	0.0873743	0.0428633	0.136137	0.0699635	1.06013	1.23071	0.566522	1.82073	1.30327	3.22163	2.24876	1.63805	2.15614	2.35395
ENSOART00000001796.1	21.4121	20.8137	10.3026	11.6265	12.6727	17.1016	19.7968	14.0132	17.0783	16.3063	5.27721	5.14317	4.79669	6.43574	6.07868	8.80363	13.2241	11.1665	12.3239	19.0023
ENSOART00000001794.1	3.33059	11.9001	15.724	12.0308	13.0841	4.83947	6.69027	5.21152	6.71387	4.56267	21.3003	24.5075	11.8385	19.5321	22.2278	10.2802	13.5172	12.4916	9.54429	11.638
ENSOART00000001800.1	8.27505	8.74848	8.16578	10.4364	7.33635	10.9341	16.1857	8.85178	17.2069	13.1916	3.73936	4.46738	4.31038	3.86028	3.8226	7.61297	13.0593	8.93052	9.73677	10.452
ENSOART00000001802.1	1.52652	1.23448	0.963232	1.17932	1.71708	2.03665	2.25664	4.36713	4.46119	2.74164	1.62479	1.51294	0	0.855234	0.814507	3.78471	2.5733	0	0.707852	2.63401
ENSOART00000001808.1	19.0225	14.2056	12.2386	12.3916	13.3423	17.2829	24.0435	22.3331	21.3028	23.1246	7.2436	6.76849	7.46154	6.81714	6.99087	9.78156	15.3787	11.6233	15.6968	17.1357
ENSOART00000001804.1	0	0	0	0	0	0	0	0	0	0	0	0	0	0	0	0	0	0	0	0
ENSOART00000001805.1	20.5368	19.6948	13.2553	14.6049	15.4408	26.1619	22.2673	21.3119	20.8839	21.012	10.0916	8.14013	7.30885	8.09331	8.67316	16.4061	21.5749	16.293	20.42	23.3639
ENSOART00000001806.1	0.734027	1.86885	1.67082	1.38486	1.98384	0.418769	0.904417	0.754959	0.866709	0.479543	3.43303	3.05866	1.10445	2.23004	3.05388	0.89574	1.57299	0.621016	1.10554	1.6947
ENSOART00000001807.1	0	0	0	0	0	7.5912	2.3429	1.11976	0.167657	0.0529648	0.0423285	0.0087789	0.00851959	0	0	0.0151919	0.00805257	0	0	0.0271746
ENSOART00000001809.1	0	0.0605356	0.0870345	0.0216766	0.560152	0.761861	2.27401	0.422279	0.566162	0.430725	1.23823	2.48571	2.69516	1.1738	1.33546	1.06389	0.544919	1.99024	1.71014	1.32274
ENSOART00000001810.1	0	0.0374448	0	0	0	0	0	0	0	0	0	0	0	0	0	0	0	0	0	0.0168625
ENSOART00000001823.1	0.667632	0.660276	0.533289	0.37593	0.463061	2.4894	2.23736	4.32134	2.59185	3.24497	0.832327	0.534706	0.334043	0.624515	0.682137	0.0469018	0.0337027	0.099249	0.0476487	0.0721511
ENSOART00000001811.1	0.0332886	0.0217609	0	0.0117033	0.075912	0.0324383	0.0966881	0.0428031	0.0793734	0.0814883	0.102354	0.11576	0.0973231	0.0408296	0.15013	0.146881	0.265352	0.260419	0.313593	0.286825
ENSOART00000001814.1	12.6814	11.5115	6.43502	5.99656	8.87099	18.1397	22.5634	20.1011	18.0567	15.1841	5.63231	4.4253	4.11483	6.22581	4.68614	10.885	8.27406	9.94955	8.88454	8.01013
ENSOART00000001813.1	12.5195	12.0421	9.74169	11.6411	10.3782	9.33502	11.7631	8.69709	10.6247	9.20712	12.0672	10.3094	9.23609	10.2324	11.6124	9.21262	10.0789	9.56621	10.7853	11.2806
ENSOART00000001812.1	0	0	0	0	0	0	0	0	0	0	0	0	0	0	0	0	0	0	0	0
ENSOART00000001815.1	33.5601	43.3655	30.0281	35.725	33.1305	40.7187	50.8461	50.1225	43.4566	36.9022	26.1167	21.834	27.0225	27.4311	24.0066	15.1963	19.2602	18.9938	18.8436	23.523
ENSOART00000001816.1	148.965	72.3939	68.3194	83.8843	67.6542	138.295	90.1289	157.357	138.661	137.034	122.794	89.9214	98.2938	87.9965	100.027	66.87	69.3246	58.6743	68.9189	62.7321
ENSOART00000001817.1	159.702	100.278	92.1897	103.499	97.1056	150.016	135.581	143.873	129.088	144.943	22.7657	21.6902	20.8078	13.9696	25.4596	17.8314	25.0488	24.0262	25.2394	21.8907
ENSOART00000001818.1	0	0	0	2.91396	0	0.668899	1.7768	1.71352	1.44595	0	1.62444	1.03614	1.51733	2.63655	0	3.48218	6.68807	5.58602	6.39474	4.41967
ENSOART00000001820.1	0.101038	0	0	0	0	3.12301	5.07006	7.04868	3.08225	2.24277	64.0435	61.3288	46.2641	62.59	54.1674	171.612	182.886	175.723	142.068	135.775
ENSOART00000001822.1	0.0937488	0.110336	0.0598864	0.0527815	0.0589653	0.274153	0.343427	0.30585	0.294287	0.190433	0.267819	0.187133	0.269846	0.212761	0.144828	0.0677347	0.093655	0.164302	0.133816	0.0540117
ENSOART00000001819.1	209.943	281.769	241.843	246.533	261.165	142.045	198.895	191.042	204.973	164.251	97.3594	89.4597	62.2913	119.653	77.2163	115.703	74.7858	126.833	94.7994	78.6554
ENSOART00000001824.1	0.165357	0.0981179	0.0769228	0.157341	0.196122	0.284252	0.362194	0.276739	0.243195	0.147623	0.714024	0.530305	0.34911	0.405489	0.359551	0.56732	0.721376	0.59848	0.555052	0.929212
ENSOART00000001828.1	3.04834	1.66625	1.57002	1.77112	1.71426	2.64419	3.15836	3.06959	2.79041	2.50439	3.04796	2.65279	2.33952	2.86891	2.49809	12.5097	16.3152	12.892	15.3109	12.6223
ENSOART00000001826.1	53.8242	42.9062	31.0622	34.9037	43.3604	49.5633	55.9916	38.6693	53.8174	53.7322	28.0668	25.7637	26.4166	27.047	29.2347	51.5906	58.9751	54.7383	67.5179	74.2512
ENSOART00000001825.1	15.5301	6.8572	8.74998	8.57905	9.96121	10.826	16.8441	12.1835	12.1884	9.40156	13.304	11.7768	16.3006	9.77835	12.0572	121.393	102.01	131.477	77.5104	63.4008
ENSOART00000001827.1	0.0673166	0.0165228	0.124543	0.0176962	0.11501	0.0491093	0.0439213	0.129508	0.11982	0.0879336	0.0283079	0	0.034081	0.0309221	0.0489671	0.0201766	0.0963621	0.078601	0.157955	0.0362761
ENSOART00000001829.1	1.13457	1.47017	1.35622	1.72048	1.90694	1.37221	1.46556	0.977211	1.14944	1.21191	1.7591	1.56446	1.2097	1.23011	1.29203	2.4018	2.03164	4.75501	2.11683	2.13973
ENSOART00000001840.1	14.7731	13.0177	11.7216	13.8729	15.7372	11.309	21.2876	14.4269	15.0207	12.0223	15.5912	13.8329	15.5479	14.9466	15.3502	13.574	18.1593	21.4319	16.3885	21.5366
ENSOART00000001836.1	1.05733	0.326233	0.0288064	0.0871742	0.167901	2.60346	0.692938	0.73192	0.362476	0.317898	9.95022	18.2401	4.06032	53.2555	22.4341	51.0573	75.5419	53.7217	115.963	71.4368
ENSOART00000001830.1	2108.19	1098.35	639.118	638.687	614.935	2199.08	1758.89	1912.14	1632.58	2907.37	203.278	166.517	189.054	202.745	190.552	693.225	555.465	581.795	605.102	585.757
ENSOART00000001832.1	9.19749	9.11898	6.02691	7.95448	7.53622	5.37518	13.142	12.0494	11.8606	10.951	3.3261	2.50607	2.34058	2.88405	3.28856	5.0972	5.17305	5.27843	4.65083	5.63843
ENSOART00000001833.1	9.1382	3.52684	1.61248	3.14523	2.52006	23.4881	11.8333	10.173	11.9013	13.7747	6.99229	8.75967	8.90397	12.3939	12.1651	31.499	79.0506	33.2003	69.4015	130.405
ENSOART00000001831.1	0	0	0	0	0	0	0	0	0	0	0	0.185023	0	0	0	0	0.177984	0.257343	0	0.545496
ENSOART00000001834.1	11.6729	15.4107	15.9275	17.1958	17.4937	22.9247	30.9624	23.0264	20.6697	13.3238	18.8384	22.7784	25.1569	21.059	18.2323	9.21555	15.1934	21.8032	15.3666	19.9136
ENSOART00000001838.1	0	0	0	0	0	0	0	0	0	0	0	0.0686006	0.0316836	0	0.0542738	0	0.096074	0.0350902	0	0.480956
ENSOART00000001839.1	0	0	0	0	0	0	0	0	0	0	0.0300962	0.0214114	0.0302127	0.0331001	0	0.108172	0.0854029	0	0.154108	0
ENSOART00000001835.1	60.348	44.1772	23.6306	34.134	27.7805	34.7079	26.5769	30.2682	47.4694	42.9903	27.2176	21.6867	13.3402	27.0883	31.6445	34.5517	50.152	50.8081	43.7343	54.7886
ENSOART00000001843.1	2.44034	1.89134	1.80844	1.87716	1.66322	2.32159	3.16181	2.32106	2.23691	2.14457	5.17174	6.1744	5.64276	5.92133	5.50267	20.1152	49.21	5.32314	56.8392	79.0468
ENSOART00000001841.1	14.2016	9.22912	6.02267	7.49381	7.99847	9.41829	10.4727	9.65491	9.44537	9.29915	5.49944	3.72563	3.81221	4.76618	5.05797	8.61157	10.5189	9.90644	10.4046	16.3033
ENSOART00000001844.1	35.1356	25.8597	17.6002	18.9566	21.0099	35.6678	33.4174	27.9141	29.2277	33.6498	14.2338	11.8359	11.4021	13.4059	12.5434	24.1624	27.6789	20.4241	31.3079	33.8062
ENSOART00000001845.1	1.23181	0.310582	0.211734	0.433016	0.330938	0.525842	0.572382	0.331794	0.563324	0.233801	10.9858	9.30822	8.57207	12.3563	11.5884	81.8308	41.5584	110.174	49.4205	41.2509
ENSOART00000001842.1	0	0	0	0	0.106821	0	0	0.164856	0	0	0.106613	0.181153	0.182507	0	0.13072	0.158422	0	0.124677	0	0
ENSOART00000001849.1	1.65577	1.22203	1.10024	1.72723	2.41638	2.85839	2.56924	2.00985	3.83903	3.34509	1.19961	1.36213	1.59242	2.13711	2.22059	2.72665	2.9583	3.40568	2.87233	4.46761
ENSOART00000001846.1	0	0	0	0	0	0	0	0	0	0	0	0	0	0	0	0.266752	0.0714123	0.0699177	0.191578	0
ENSOART00000001848.1	151.886	93.598	43.7692	59.9396	59.133	126.962	111.964	109.563	104.866	123.699	47.1235	32.0772	31.9809	43.7701	31.723	30.1647	40.1717	27.6176	39.9051	44.4493
ENSOART00000001850.1	11.4021	13.8678	14.2795	13.691	13.946	13.0868	16.7952	13.5031	15.7055	13.7504	16.9654	17.732	13.9467	15.3014	14.867	36.1787	38.2385	34.9855	39.9136	32.9463
ENSOART00000001856.1	0.0225553	0.0486719	0.0240353	0.0523995	0.0232392	0.00439781	0.00787188	0	0.00924085	0	0.11379	0.0565645	0.0426045	0.0332057	0.108854	0.0489015	0.0934848	0.135537	0.0927234	0.0975655
ENSOART00000001847.1	2.90477	2.47028	2.42241	2.06895	2.93156	2.54278	3.16758	2.48202	2.35896	2.48117	3.65237	3.16051	2.60505	2.91123	2.92617	4.07532	4.77556	4.2834	5.33382	4.73946
ENSOART00000001852.1	45.7236	51.341	32.3231	40.4469	36.3347	49.1603	63.5063	76.9594	77.1363	65.9595	7.62295	7.45398	5.40452	8.4712	7.91059	17.3248	23.5841	18.1629	26.7538	26.8023
ENSOART00000001855.1	0.356149	0.367688	0.186263	0.204473	0.160771	53.7831	71.0627	51.682	65.1473	45.9581	0.246747	0.195784	0.147532	0.178591	0.241316	104.599	63.7375	135.659	46.0341	49.6127
ENSOART00000001853.1	5.7407	3.76011	2.57074	3.06645	3.49758	4.00954	5.17657	3.61127	4.34037	4.77883	2.51033	1.81822	1.96234	1.9143	2.22676	4.0952	4.55725	3.28736	4.5371	4.67595
ENSOART00000001854.1	28.1842	8.86302	2.26721	3.15927	2.02581	21.2561	6.2876	7.03257	6.83	11.1896	4.12744	4.67018	6.14879	7.04319	5.39315	15.336	13.3534	16.7974	10.7979	14.7838
ENSOART00000001857.1	0	0	0	0	0	0	0	0	0	0	0	0	0	0	0	0	0.0107084	0	0.0287485	0
ENSOART00000001880.1	0	0	0	0	0	0	0.0102789	0	0.00603199	0	0.0396111	0.036928	0.0516737	0.0216845	0.0625748	0.0851461	0.125863	0.0719158	0.0857849	0.0127326
ENSOART00000001859.1	0	0	0	0	0	0	0	0	0	0	0.0496212	0.0825628	0.060363	0.0548132	0.0867428	0.0357819	0.180658	0.0839242	0.306344	0.0634918
ENSOART00000001858.1	0	0	0	0	0	0	0	0	0	0	0	0	0	0	0	0	0	0	0	0
ENSOART00000001864.1	0	0	0	0	0	0	0	0	0	0	0.0106923	0.0443527	0.00860881	0.950673	0.0123349	0.460521	0.972359	0.0598883	0.196688	0.741336
ENSOART00000001860.1	0.319103	0.260352	0.110652	0.0556575	0	0.310325	0.321749	0.202326	0.0535476	0.220601	0.526649	1.68518	0.826907	0.586377	1.08778	2.48289	2.86976	3.79332	3.27892	2.34668
ENSOART00000001861.1	0	0	0	0	0	0.0228488	0	0	0	0.0245269	0.0391602	0	0.0791827	0.0215781	0	0	0.0673548	0	0.0200959	0
ENSOART00000001862.1	0	0	0	0	0	0	0	0	0	0	0	0	0	0	0	0	0.0129613	0	0	0
ENSOART00000001865.1	1.32839	1.35507	1.07966	1.69084	1.23523	5.48761	5.79577	5.93219	5.31801	5.02354	0.585162	0.68284	0.337383	0.712914	1.06925	4.09528	4.8142	5.07986	5.49571	3.6669
ENSOART00000001866.1	0.487548	0.653155	0.470908	0.286268	0.458791	0.539449	0.976977	0.42602	0.648301	0.413328	1.2482	1.20602	1.10184	1.05387	0.947138	1.44342	1.9475	1.61282	1.23779	3.07333
ENSOART00000001868.1	1.64192	1.67705	1.34392	1.34684	2.5932	1.8666	2.3943	2.05236	3.82137	3.00224	4.32125	4.32956	5.46965	4.03818	4.45206	8.02646	8.78001	6.85052	8.99345	9.38065
ENSOART00000001863.1	0.296077	0.579868	0.307399	0.495512	0.394277	0.403319	0.410085	0.150039	0.358497	0.370382	0.878163	1.30462	0.841727	0.925216	0.866348	1.77222	1.93105	3.00353	1.69169	2.60509
ENSOART00000001867.1	0	0	0	0	0	0	0	0	0	0	0	0	0	0	0	0	0	0	0	0
ENSOART00000001885.1	14.6398	12.1552	5.72903	9.4456	8.51619	14.1993	16.1579	13.5791	10.4134	14.5732	8.13763	7.67601	7.43936	7.15254	7.38122	8.7561	12.8337	12.4757	11.1872	15.2749
ENSOART00000001891.1	5.53365	3.81234	3.36957	2.69318	6.29831	6.41265	5.76416	5.37182	8.98611	6.3787	2.7512	2.7977	2.81241	3.41601	4.22372	5.37922	5.71174	6.3253	6.5195	8.43399
ENSOART00000001895.1	237.317	255.366	188.09	233.073	219.479	185.62	250.085	199.341	202.921	194.747	161.948	114.561	137.188	163.4	154.072	130.169	111.199	149.191	118.092	143.61
ENSOART00000001869.1	61.7305	43.2816	27.4638	33.3314	40.0499	57.9621	67.8826	62.9642	60.8247	65.6493	11.4648	8.51379	9.2913	12.2734	10.3412	28.6276	34.9931	26.0522	35.1672	36.4806
ENSOART00000001871.1	3.07747	2.00385	1.30846	1.89485	2.37083	3.22098	3.79711	3.52557	3.19734	2.82238	4.84188	5.23831	3.83508	4.29339	3.69456	5.4901	6.74615	9.1451	5.00205	7.9022
ENSOART00000001875.1	7.41179	8.4746	2.63243	3.39002	2.04253	2.96416	2.81937	2.31773	2.55996	1.72985	16.9606	17.8716	15.5853	14.2596	15.9578	6.78506	6.81647	8.19824	5.87475	6.60796
ENSOART00000001874.1	0	0	0	0	0	0	0	0	0	0	0.59801	0.532052	0.260697	0.531725	0.657139	0.346452	0.200081	0.135742	0.206454	0
ENSOART00000001876.1	0	0	0	0	0	0	0	0	0	0	0	0.0135729	0.0131621	0	0.0188492	0.093924	0.0995259	0.201466	0.083539	0.0420587
ENSOART00000001873.1	0	0	0	0	0	0	0	0	0	0	0	0.0210421	0	0	0	0.03648	0.00969567	0	0	0
ENSOART00000001877.1	29.3568	30.5284	19.1725	23.7192	25.3455	23.785	30.7744	34.8835	31.1522	25.5545	9.66813	9.82502	7.25983	5.82055	6.08181	12.1594	14.0445	11.4078	11.9496	11.9376
ENSOART00000001878.1	0.284573	0.0836439	0.0599105	0	0.21673	0.803232	0.469511	0.0363897	0.144525	0.118787	1.27955	1.18251	0.998688	0.706361	1.13128	3.00619	2.25079	2.69705	2.94853	3.27533
ENSOART00000001879.1	3.03017	2.39394	1.70846	2.69052	1.55115	11.4762	14.0742	13.7914	10.9734	11.5681	1.03934	2.36692	0.740062	1.53671	3.17647	8.7387	8.97392	15.0491	10.9448	6.10575
ENSOART00000001881.1	2.37674	3.76358	2.83693	3.35003	4.22618	11.6711	16.0228	14.2118	18.3646	16.1551	1.98721	1.6129	2.72055	2.05489	1.50037	9.52233	12.8694	11.2628	9.62085	16.1313
ENSOART00000001883.1	1.30361	0.793366	0.596067	1.75828	1.2672	1.30026	1.13746	1.51907	1.48515	1.21671	1.46884	1.90624	1.54115	1.19157	1.84788	1.36811	2.16314	3.99514	1.72445	3.11762
ENSOART00000001882.1	0	0	0	0	0	0	0	0	0	0	0	0	0	0	0	0	0	0	0	0
ENSOART00000001887.1	0.0768185	0.0188241	0.0203111	0.0202254	0	0	0.0668288	0.0492601	0.0195696	0.0803914	0.0642047	0.146634	0.0388766	0.194273	0.0371765	0.369343	0.428686	0.342477	0.772962	0.411639
ENSOART00000001886.1	61.1028	46.0988	32.4211	38.7312	37.7076	150.444	144.208	183.828	162.169	175.35	30.6466	16.6949	27.2177	14.8926	16.2021	88.0256	61.604	121.57	69.6729	58.7734
ENSOART00000001884.1	4.4881	3.74468	1.27982	1.70467	2.89045	1.57817	1.78503	4.10933	2.70535	2.17527	1.78379	2.10537	1.77832	1.677	1.90931	4.72694	4.93135	4.59184	4.88452	6.53995
ENSOART00000001888.1	0.496714	0.0750593	0.0988761	0.194702	0.186615	0.171622	0.284532	0.303503	0.298021	0.328669	12.4003	16.9707	10.3638	20.651	15.6756	53.5635	65.5977	30.5103	45.8834	44.9058
ENSOART00000001890.1	1.12633	0.913005	0.684559	1.05557	0.895746	2.54727	5.49728	6.52034	3.88034	3.13253	11.9727	11.3022	10.1338	12.0091	10.9618	21.9903	20.2593	19.2963	18.999	17.0243
ENSOART00000001889.1	0.392113	0.118199	0	0	0.0509959	0.792559	0.130915	0.0385495	0.122476	0.0314599	7.83056	9.70963	8.20389	24.8439	21.3563	37.2133	31.2838	36.0008	25.0014	28.0011
ENSOART00000001897.1	0.0753327	0.166252	0.280936	0.487224	0.468877	0.0229501	0.0123236	0.00606635	0	0	0.56211	0.675618	0.771825	0.589173	0.749875	0.357266	0.552409	0.32271	0.475821	0.53964
ENSOART00000001898.1	8.23581	7.2379	5.15455	5.46868	5.65003	7.29087	10.3308	8.30073	9.26294	8.8167	4.41949	4.33421	3.6648	4.23566	5.06317	6.24329	11.688	9.03297	11.8349	20.6599
ENSOART00000001892.1	1.69853	1.05933	0.768763	1.30028	1.78019	1.52504	2.45496	1.75243	1.5719	1.06098	1.32591	1.98913	1.81605	1.72414	1.47401	2.17334	2.80678	3.87139	2.47458	4.05918
ENSOART00000001893.1	0.0359412	0	0	0	0	0	0	0	0	0	0.381622	0.841382	0.282907	0.242449	1.19274	0.0432451	0.00382	0	0	0
ENSOART00000001894.1	62.8086	49.2544	45.2033	48.1517	54.1709	44.0312	61.9398	48.793	58.5445	58.7091	74.615	47.0569	52.4951	63.946	68.2437	120.262	92.1017	95.3752	91.5115	100.56
ENSOART00000001896.1	56.8806	38.4557	25.3073	35.7414	32.9371	43.0175	42.0301	33.028	40.4452	45.2136	12.5641	11.4835	10.5682	11.5139	13.1424	27.71	44.8692	23.0567	51.6466	60.4413
ENSOART00000001899.1	0	0	0	0	0	0	0	0	0	0	0	0	0	0	0	0.104384	0	0	0	0
ENSOART00000001900.1	0	0	0	0	0	0	0	0	0	0	0	0	0	0	0	0	0	0	0.0673917	0
ENSOART00000001901.1	16.5887	14.3919	9.53713	10.4813	11.7425	17.2422	15.6038	16.5347	15.8275	15.7245	7.54581	7.47559	6.56994	7.81273	7.31306	9.62892	13.6794	11.321	12.5552	16.8563
ENSOART00000001903.1	0.017843	0	0.0188842	0	0	0	0.108688	0.457875	0.345624	0.26153	0	0	0	0	0	0	0.0113796	0	0	0
ENSOART00000001904.1	5.31281	4.25738	4.13666	4.15293	5.43205	4.90641	5.4797	3.9411	5.32745	4.74634	6.83178	3.8376	4.69109	4.90767	5.34022	3.16066	2.34353	3.26176	1.97711	2.38643
ENSOART00000001902.1	1.92293	2.27831	1.40016	1.48394	1.30274	1.80787	2.12256	1.75479	1.71544	0.94704	3.49536	3.85149	2.36445	2.96637	3.25886	2.56748	3.91721	4.10885	3.08648	4.71273
ENSOART00000001905.1	0	0	0	0	0	0	0	0	0	0	0	0.44693	0	0	0	0	0	0	0.292072	0
ENSOART00000001908.1	72.1723	57.783	39.6455	44.8272	51.6359	55.3998	67.9128	70.5076	69.5842	67.9732	55.4311	40.9672	40.8382	37.2124	39.9556	50.0148	43.825	49.2611	42.1391	45.9235
ENSOART00000001910.1	25.1013	15.1204	14.0724	16.4844	23.8641	21.7738	25.6663	18.1246	30.6377	25.7295	13.0064	12.0941	13.7518	12.1583	14.1388	21.4148	13.3491	23.3162	11.8899	11.4049
ENSOART00000001909.1	2.15137	2.1506	1.32704	1.3192	1.26252	0.521048	0.502054	0.397389	0.186604	0.368816	0.542255	0.90884	1.21588	0.569077	1.07496	0.525178	0.691793	1.32117	1.46211	2.36616
ENSOART00000001906.1	1.74236	1.3186	0.704716	0.872054	0.465863	2.45633	2.33315	2.6133	2.49826	2.32295	2.19754	2.23876	0.66351	0.873468	0.950686	5.06942	8.86548	0.655004	4.98592	6.58558
ENSOART00000001907.1	1.29388	1.21027	0.841516	1.12495	1.31567	1.30547	1.15495	1.66577	1.89911	1.38941	1.00867	1.54879	0.928003	1.01033	0.733436	1.45882	3.71541	3.54264	2.4963	4.16838
ENSOART00000001912.1	0	0	0	0	0	0.0117527	0	0	0	0	0.212425	0.452885	0.309383	0.210855	0.489771	0.508514	0.973474	0.634162	0.465004	0.936046
ENSOART00000001911.1	0	0	0	0	0	0	0	0	0	0	0	0	0	0	0	0	0	0	0	0
ENSOART00000001918.1	52.0868	52.7745	47.937	46.7733	43.1874	45.9343	35.5609	50.5127	45.8452	47.9017	42.7754	31.2404	28.2534	37.114	32.5949	39.7916	30.732	38.1975	29.9931	32.1598
ENSOART00000001915.1	3.01262	3.04473	2.47443	4.01414	4.77334	3.73212	2.65085	3.90405	4.87087	2.7626	2.14614	3.40531	2.84141	1.96679	4.33201	2.19835	2.65333	2.81831	2.13056	2.90344
ENSOART00000001917.1	0.0448997	0.0468573	0	0	0.0336586	0.077719	0	0	0	0.0396926	0.148782	0.329528	0.0250251	0.0753115	0.45133	0.11682	0.140292	0.115645	0	0.221085
ENSOART00000001919.1	1.98025	0.867475	0.54234	0.272759	0.826496	37.5004	36.6305	55.661	50.6559	34.9195	16.3048	17.7387	16.6972	17.6221	20.3507	94.5725	83.7973	101.373	87.9069	104.962
ENSOART00000001913.1	0	0	0	0	0	0	0	0	0	0	0	0	0	0	0	0	0	0	0	0
ENSOART00000001914.1	0.047606	0	0.0253696	0	0.0615708	0	0.0627962	0.0606215	0	0.0505428	0	0	0.0318936	0	0	0	0.0529541	0.0224104	0.0408453	0.209023
ENSOART00000001916.1	2.79886	1.59872	1.506	2.44749	2.64876	2.97565	3.92813	2.90597	4.24326	3.38222	1.95423	1.55345	2.12679	1.50549	1.87338	2.57671	2.60058	3.46108	3.4299	3.94445
ENSOART00000001920.1	10.3202	12.6347	10.8262	18.496	17.5841	9.92272	4.36169	9.0998	11.452	11.4981	50.3472	29.8289	31.6074	64.1714	27.9777	20.6566	29.2474	67.8419	37.5098	37.1082
ENSOART00000001921.1	164.054	153.057	103.872	119.404	128.36	166.497	145.471	134.27	154.004	157.49	68.4244	51.7825	47.2869	56.3459	54.0946	70.1586	83.3962	73.8251	95.5923	107.89
ENSOART00000001923.1	53.198	27.3881	23.3474	25.6974	29.0571	31.8122	41.5865	40.7582	44.5591	40.5895	18.9403	16.4923	18.2449	22.1079	21.402	25.0443	29.562	31.009	29.4753	35.4908
ENSOART00000001922.1	1.08245	0.212057	0.26487	0.0378673	0.243124	0.877608	0.438032	0.552289	0.730882	0.67626	1.97701	2.19495	1.41272	3.64821	2.48726	11.0764	10.0471	11.003	7.26118	11.1741
ENSOART00000001943.1	0.828459	0.955393	0.685084	0.704827	0.76491	1.20272	1.75951	1.02622	1.11877	1.19237	1.16609	0.943169	0.968363	0.933524	0.884024	1.19474	1.00708	1.38443	0.870579	1.41257
ENSOART00000001927.1	0	0	0	0	0	0	0	0	0	0	0	0	0	0	0	0	0	0	0	0
ENSOART00000001924.1	0	0	0	0	0	0	0	0	0	0	0	0	0	0	0	0	0	0	0	0
ENSOART00000001926.1	0	0	0	0	0	0.02574	0	0	0	0	0.0661067	1.15429	0.124915	0.875192	0.743234	1.55582	2.91779	1.31514	4.23422	10.2136
ENSOART00000001925.1	48.3981	41.4847	33.9345	34.0618	44.9941	46.3667	55.6899	46.4071	59.6343	62.4894	24.9424	21.7079	20.9766	29.0374	30.1219	46.0625	56.0615	39.9558	56.5956	56.2345
ENSOART00000001928.1	83.6958	112.967	92.1849	88.8616	101.083	64.8219	80.603	48.9943	71.6556	70.7874	68.8844	60.7564	67.2343	87.1236	61.9609	225.256	180.61	332.212	185.113	173.846
ENSOART00000001929.1	163.19	107.107	74.1705	78.1529	74.0392	154.603	109.724	137.423	108.891	110.384	62.9222	52.4695	40.7889	67.9509	50.3556	134.757	119.478	113.359	126.326	112.441
ENSOART00000001934.1	12.566	9.67644	8.39315	9.70168	9.35529	16.3503	23.432	25.6683	29.3523	22.7083	7.69476	7.42589	6.86944	8.55554	7.48367	18.5708	18.9473	18.3682	19.0095	14.2416
ENSOART00000001930.1	0	0	0	0	0	0	0	0	0	0	0	0	0	0	0	0	0	0	0	0.188647
ENSOART00000001932.1	22.5461	20.3848	11.8244	8.3042	9.98437	14.8917	22.7176	13.088	16.1367	17.0769	13.7188	13.1862	14.2663	13.2968	14.1365	32.5173	34.4991	31.0162	34.3725	34.7412
ENSOART00000001931.1	0	0	0	0	0	0.0137438	0.0109697	0	0	0	0.224449	0.403412	0.419114	0.815002	0.516343	0.93621	1.42723	3.4212	2.48006	1.66368
ENSOART00000001933.1	11.7964	15.9231	14.3028	15.317	15.5125	9.80036	16.1193	12.4206	18.0344	13.7033	8.30655	7.69409	7.71472	5.2935	7.62816	5.70808	10.7489	11.4011	7.09707	13.0751
ENSOART00000001935.1	0	0	0	0	0	1.50503	0.86307	1.51706	2.08023	0.738747	0.207301	1.49645	0.373329	0.456166	0.775541	161.144	104.147	179.35	100.28	80.0329
ENSOART00000001936.1	7.54826	10.8226	5.54519	4.84621	3.72407	0.888858	1.27166	0.703667	0.908741	0.502366	3.4417	1.89517	3.14639	2.76904	7.43847	0.658582	0.596241	0.374638	0.429654	0.36835
ENSOART00000001937.1	0	0	0	0	0	0	0	0	0	0	0	0	0	0.0635644	0.0675055	0	0	0	0	0
ENSOART00000001940.1	0	0	0	0	0	0	0	0	0	0	0	0	0	0	0	0	0	0	0	0
ENSOART00000001939.1	5.31426	2.83673	1.75278	2.55692	3.5302	4.32651	5.72767	3.6797	5.3803	4.78735	2.35643	2.25565	2.28034	2.60701	2.35537	4.7573	5.19733	5.8505	4.57649	5.93257
ENSOART00000001938.1	1.54398	1.17544	1.16556	1.2115	1.19007	1.024	1.00081	1.39156	1.55809	1.20428	2.28147	2.08784	2.3385	1.37472	2.93961	0.908543	0.869444	1.1409	0.647046	0.564263
ENSOART00000001947.1	0	0	0	0	0	0	0	0	0	0	0.245904	0.258646	0.044403	0.153552	0.173784	1.73412	1.62512	0.621037	0.264422	1.03151
ENSOART00000001942.1	5.6525	1.99624	1.07345	1.68644	2.83153	5.91903	7.5167	4.42737	8.46597	10.4658	2.85982	1.51618	2.25857	3.36623	3.2337	5.80214	2.70068	3.25353	3.69552	2.99455
ENSOART00000001941.1	0.56273	0.472897	0.474148	0.709211	0.525498	1.44603	1.24458	0.820413	1.21562	0.758303	1.37689	1.39659	1.32544	1.13963	1.64543	2.26348	2.30869	2.57037	1.76306	2.24369
ENSOART00000001956.1	0.0310235	0	0.0132121	0.0131	0	5.77822	7.02494	5.7184	6.69508	4.29466	0.0471164	0.0777688	0.104731	0.0171423	0.354584	5.88836	5.52984	11.853	4.3012	4.95299
ENSOART00000001948.1	7.69587	6.53916	4.55739	4.72575	4.99376	6.33542	9.11186	7.1041	7.17776	7.80092	5.0025	4.31319	3.62715	4.46416	4.82902	6.91155	9.14074	6.57237	9.04859	12.5721
ENSOART00000001944.1	0.0535475	0	0	0	0	0	0	0	0	0	0.3093	0.184427	0.362025	0.196813	0.417256	0.25641	0.170988	0.402066	0	0.674985
ENSOART00000001945.1	2.99931	1.91772	0.217815	0.262028	0.0699303	0.162072	0.252555	0.636362	0.252647	0.129934	215.5	175.384	202.768	95.2303	217.924	0	0.172743	0.0390864	0.0356722	0
ENSOART00000001946.1	0	0	0	0	0	2.31727	0	0	0	0	7.2468	9.35895	6.41816	15.298	10.5554	69.9542	70.3234	47.878	53.1113	78.4178
ENSOART00000001964.1	2.9732	1.93447	1.56619	1.52041	1.7009	2.08467	1.7989	1.49851	1.88929	1.54051	1.13189	0.804187	0.856311	0.885778	1.01959	1.21087	1.44768	1.30782	1.47019	1.8244
ENSOART00000001949.1	5.93534	5.64719	4.31551	5.18002	6.49792	5.80522	6.24661	7.49038	7.78715	6.65447	3.44442	3.17074	3.65527	4.528	3.57565	5.20778	6.66407	5.01369	5.19622	8.06529
ENSOART00000001952.1	0.238806	0.0604387	0.0327816	0.0243897	0.0264051	0.360403	0.0738872	0.118991	0.0709323	0.0485412	5.53727	6.32195	5.25941	16.9031	14.2624	17.4824	17.0554	19.332	13.0826	19.7212
ENSOART00000001955.1	95.0066	90.4064	44.6612	49.5859	52.3382	45.0336	56.1952	66.2123	63.4386	52.494	19.0783	13.8662	13.1139	17.7859	15.7265	7.36234	10.4083	9.42935	10.1418	16.7245
ENSOART00000001951.1	0	0	0	0	0	0	0	0.115441	0	0	0.0375639	0.125298	0	0.166882	0.0883342	0.271916	0.173834	0.12779	0.155483	0.1916
ENSOART00000001950.1	9.85225	4.67914	5.39467	4.91795	6.11856	10.0385	12.4462	7.21814	9.30984	10.7292	4.62768	4.23975	4.03218	3.52865	5.10067	8.68733	14.5724	8.40372	14.6836	17.7548
ENSOART00000001967.1	22.9313	22.3021	14.1913	18.0336	19.9786	15.6375	24.9488	20.1101	22.1858	20.5235	17.2881	15.412	16.2092	17.3914	15.2176	13.3098	18.4354	19.2001	17.7327	23.1836
ENSOART00000001962.1	81.8557	63.6889	42.5547	54.3608	55.5399	89.1048	106.483	58.4127	86.2543	87.6041	18.01	15.3485	16.0303	16.7115	18.0087	38.9288	56.8531	32.0343	58.7572	76.7261
ENSOART00000001954.1	5.34021	3.59099	2.58301	2.83436	2.87665	4.4364	4.30913	4.03983	3.63426	4.22252	3.17298	2.29872	1.98572	2.87312	2.55622	3.2428	4.28153	3.65027	4.78076	5.3925
ENSOART00000001957.1	23.1651	25.7678	18.7926	23.8601	22.2532	17.5136	22.1624	17.5324	22.6943	22.0076	10.8254	10.7311	14.2642	12.5844	11.9964	6.49692	8.73238	6.46601	8.71939	9.49442
ENSOART00000001958.1	0.0821402	0	0	0	0.0689695	0	0.426859	0.261465	0.664303	0.213521	1.53141	0.482114	0.665461	0.377485	0.478947	0.295257	0.248886	0.154129	0.316527	0.347444
ENSOART00000001953.1	12.503	4.58036	7.77713	7.55337	16.2431	16.2477	15.7766	15.5293	33.6325	24.1217	4.12642	4.55129	6.88786	7.20014	7.83826	37.0719	26.6612	57.4808	28.7858	21.5543
ENSOART00000001959.1	14.3931	12.722	11.5473	11.9165	17.6416	11.6026	17.6621	14.625	20.1154	17.1847	11.2362	9.74485	9.3206	13.0349	11.5181	18.2848	20.5297	16.0743	20.9229	22.5593
ENSOART00000001981.1	0	0	0	0	0	0	0	0	0	0	0	0	0	0	0	0	0	0	0	0
ENSOART00000001960.1	3.43862	1.22678	1.68606	1.02845	4.18839	3.87034	4.86385	5.98853	16.3188	12.0508	1.46811	1.61794	1.65991	2.88693	4.48347	15.666	9.20895	8.11107	3.67463	8.461
ENSOART00000001961.1	1.65356	1.48745	0.651906	0.810745	1.45474	2.06155	3.61101	3.17146	6.69986	3.25786	2.1648	2.12268	1.99381	2.9615	3.72051	7.93192	8.02443	5.9281	6.61385	6.03565
ENSOART00000001963.1	19.5103	14.2336	10.2246	12.9933	23.3628	12.0271	17.491	14.8615	18.1906	19.4616	7.49557	7.69892	9.19203	7.54582	8.86549	22.4707	16.4938	15.517	14.573	15.5705
ENSOART00000001968.1	0.0696709	0	0	0	0	1.33258	0.0911063	0	0	0	2.58045	3.38782	3.58403	2.73208	4.32409	7.11828	8.30522	7.68551	7.54793	10.5208
ENSOART00000001965.1	0	0	0.0381892	0	0	3.64979	0.221068	0.975523	0.184423	0.113762	0	0.100704	0.0245873	0	0.141459	11.0494	5.92484	14.5243	2.68236	4.55724
ENSOART00000001966.1	0	0	0	0	0	0	0	0	0	0	0	0	0	0	0	0	0	0	0	0
ENSOART00000001969.1	0	0	0	0	0	0	0	0	0	0	0.00839566	0	0	0.00920626	0.0290084	0.252935	0.194642	0.159714	0.137128	0.129428
ENSOART00000001970.1	10.3447	7.09909	3.50484	5.86715	5.69396	9.50301	11.2767	8.39312	10.0023	9.81976	4.16476	4.42305	5.91236	4.28759	5.2292	25.798	26.239	46.9765	20.2615	34.5323
ENSOART00000001975.1	0.0548826	0.143459	0.116143	0.116891	0.140186	1.09559	2.58823	3.54134	5.59336	3.49347	0.823894	0.279427	0.359754	1.3245	0.711289	24.7552	11.9564	19.3723	14.5919	14.172
ENSOART00000001972.1	0.0762008	0	0	0	0	0.667143	0.726488	0.437066	0.269929	0.277535	2.4968	4.00144	4.55263	1.92603	3.58956	7.35371	11.3386	7.61435	10.4396	12.6727
ENSOART00000001971.1	69.1285	14.7951	7.08482	13.9658	11.664	54.8789	20.9265	52.8184	27.2925	17.5922	34.188	34.5763	41.2657	30.791	44.2542	63.7881	65.0075	82.7752	54.3809	59.3798
ENSOART00000001976.1	23.0621	29.0556	14.2356	15.5188	17.909	7.96501	13.049	13.3415	14.6202	13.5784	12.0764	10.702	10.9668	9.14562	14.0471	3.72103	4.29329	4.42045	3.55975	5.2862
ENSOART00000001973.1	0.305233	0.0598009	0.0633639	0.0638534	0.101552	0	0.158249	0.231956	0	0.126526	0.150874	0.210131	0.082695	0.112291	0.238378	0.146205	0.566229	0	0.261859	0.766737
ENSOART00000001977.1	0	0	0	0	0	0.0632825	0	0	0	0	0.0951341	0.135377	0.0986266	0.0746867	0.125687	0.371066	0.533418	0.579295	0.319892	0.278996
ENSOART00000001974.1	19.9928	9.45312	7.24156	8.49577	12.757	21.3005	20.286	11.1765	21.2419	20.9198	27.5946	19.3238	24.0198	38.3694	39.719	14.4753	10.8837	14.9516	10.4685	7.68834
ENSOART00000001979.1	3.37735	2.39781	1.97169	2.78346	2.81902	9.25528	9.21647	8.43684	9.99918	9.45799	3.578	4.45877	2.78506	4.36317	3.81453	16.6966	21.2789	19.2612	18.4943	23.7127
ENSOART00000001980.1	0	0	0	0	0	0	0	0	0	0.0201144	0	0	0	0.0176758	0	0	0.208392	0.0360801	0.0493789	0.123593
ENSOART00000001978.1	0	0	0	0	0	0	0	0	0	0	2.75223	0.767488	2.13611	0.543614	0.961632	1.10009	2.8789	2.90026	2.87369	2.46813
ENSOART00000001982.1	19.4727	14.8413	10.6688	11.547	11.8147	15.2437	16.4894	21.7203	18.0039	17.4562	7.32051	6.97429	4.90716	7.39182	6.67449	10.8486	16.3579	8.85177	16.4139	17.5786
ENSOART00000001984.1	175.253	133.091	89.0496	131.297	121.435	209.699	198.026	221.035	227.939	214.152	99.4159	74.9216	91.9729	119.108	103.722	198.599	235.503	169.932	206.111	262.984
ENSOART00000001983.1	5.29737	3.57714	2.5814	2.95705	5.99699	2.97094	5.19624	3.74883	8.53789	6.93043	1.86792	1.40897	1.47453	1.15554	2.35119	3.73569	3.1022	2.47132	3.92103	3.05921
ENSOART00000001985.1	0	0	0	0	0	0	0	0	0	0	0	0.0567193	0.0277275	0	0.0399123	0.147629	0.196489	0.154129	0	0
ENSOART00000001986.1	0.143755	0.0140938	0	0.0606118	0.0122689	0.0840313	0.0125181	0.018465	0.0880403	0.0301329	0.252812	0.239763	0.242487	0.171892	0.361437	0.864554	1.02678	1.22797	0.935635	0.865312
ENSOART00000001989.1	0.258308	4.28772e-07	4.68888e-06	4.94993e-06	4.04342e-06	4.57885e-06	1.56417e-05	6.3619e-06	2.03521e-05	6.61768e-06	3.0545	3.48067	2.90428	2.57563	3.04496	3.69374	3.81427	3.66393	4.32027	4.01637
ENSOART00000001990.1	0.00213316	0.0673065	0.052216	0.0684747	0.0697704	0.112775	0.226663	0.0980812	0.203526	0.0929148	0.0666291	2.27091e-05	0	0	0	5.42697e-08	4.9501e-09	2.60483e-09	3.04241e-05	7.46522e-08
ENSOART00000001991.1	51.0064	52.8657	36.2953	42.9007	43.8012	90.9171	79.4308	80.7931	75.6423	69.0739	43.1546	35.6523	35.0373	39.6499	35.0636	99.4072	96.2114	97.4882	107	107.263
ENSOART00000001993.1	148.487	142.926	93.4953	102.815	119.149	198.962	167.796	158.671	159.862	146.699	75.8655	63.0706	66.3905	77.8562	73.3685	178.371	183.698	194.774	195.985	219.614
ENSOART00000001988.1	0	0.090997	0	0	0	0	0.0801846	0	0	0	0.151557	0.319489	0.254229	0.171622	1.0041	0.780354	2.0081	2.45703	2.49044	2.50565
ENSOART00000001987.1	0.0574748	0	0	0	0.0478694	4.03153	9.18821	12.1023	18.0564	12.5218	0.0473836	0.0395744	0	0.369714	0	38.9373	8.11913	27.9563	33.7461	8.19427
ENSOART00000001992.1	0	0	0	0	0	0.161803	0.0958307	0	0.16742	0.0574745	0.04574	0.0381785	0.0375027	0.050948	0	0.132753	0.513663	0.520425	0.332462	1.04726
ENSOART00000001994.1	76.854	72.7262	63.0859	64.08	76.9871	96.6117	114.889	91.4183	98.2602	109.157	31.165	26.9201	26.8466	32.3116	29.0072	81.3771	83.256	64.0069	88.3862	84.7284
ENSOART00000001995.1	0	0	0	0	0	0.0375567	0	0	0	0	0	0	0	0	0	0.0462766	0.0738831	0.0362246	0	0.163538
ENSOART00000001998.1	1.37367	1.40325	1.08501	1.28134	1.17422	1.67524	2.06824	1.78772	1.88742	1.42598	4.64839	2.93563	3.54123	4.27162	4.35006	22.2981	15.5869	31.9757	14.7313	11.6849
ENSOART00000001996.1	2.58728	2.79555	3.04592	3.01747	2.67229	1.95206	2.16186	1.68384	1.72335	1.4207	2.78198	3.5451	4.0637	2.97195	3.23977	32.3308	63.2516	11.0491	58.5993	79.8082
ENSOART00000001999.1	31.9839	36.8921	25.2709	37.3599	33.2785	42.8627	46.1624	38.3655	40.0913	33.5111	39.5097	36.4306	36.662	36.081	37.3863	37.454	52.5438	61.6891	47.5987	67.4432
ENSOART00000002005.1	0.0926018	0	0	0	0	0.0669609	0	0	0	0	0.825827	1.34605	1.07833	0.722739	0.907668	2.90517	3.23318	4.76218	3.47527	2.66384
ENSOART00000001997.1	0	0	0	0	0	0.0820587	0	0	0	0	0.104838	0.0582481	0.0569722	0	0.0410119	0.303279	1.00931	0.197923	0.578034	0.62416
ENSOART00000002000.1	10.4633	4.92994	2.20063	2.82367	3.63301	6.0247	4.6083	4.35242	4.49109	5.01033	3.49796	2.61923	2.79021	2.95861	2.84311	3.3167	5.01916	4.2271	5.39667	7.03288
ENSOART00000002002.1	0.13188	0.213023	0.0907812	0.171928	0.226015	0.12854	0.00676421	0.0299566	0.0873034	0.032588	0.905466	0.793769	1.37644	0.66375	1.79068	0.53236	0.662875	0.473408	0.298972	0.971198
ENSOART00000002003.1	0.0322291	0	0	0.00850281	0	0.518304	0.273978	0.176294	0.461573	0.0676873	0.933561	1.38517	1.22306	0.644905	1.40859	13.9777	11.211	24.3273	11.8964	10.3983
ENSOART00000002001.1	0	0	0	0	0	0	0	0	0	0	1.83496	1.26924	0.759131	3.06628	1.82012	0.808913	0.502154	0.351699	0.513584	0.794408
ENSOART00000002008.1	5.88368	5.18956	3.61868	4.30266	4.63289	4.96858	4.26571	4.57723	4.94073	4.18401	7.92955	6.75304	6.44621	6.45381	7.21234	5.76798	6.16444	7.51468	6.87273	7.05471
ENSOART00000002007.1	13.3054	9.33171	10.2372	10.17	10.3937	9.69835	14.1555	19.7068	18.5285	16.6439	8.10291	6.55674	7.19932	7.25173	10.0218	14.74	18.0396	14.0108	16.9709	15.7678
ENSOART00000002004.1	1.6422	1.6942	1.29351	1.6538	1.63841	1.87236	2.23821	1.91535	1.89027	1.70834	3.36945	2.87439	2.15091	2.8345	3.31208	3.65216	4.7093	4.83804	3.4633	5.02691
ENSOART00000002006.1	0	0	0	0	0	0.0354349	0	0	0	0	0.302333	0.629399	0.344222	0.769998	0.742659	1.22286	3.03212	2.80233	3.02545	3.63034
ENSOART00000002010.1	0	0.0956495	0	0.0511419	0	0.712329	0	0	0.196936	0.0506878	0.121087	0.201975	0.198002	0.0897406	0.190152	0.0584679	0.32727	0.0458196	0.292663	0.411329
ENSOART00000002012.1	0.022422	0	0	0	0	0.240157	0.0194937	0	0	0	2.78865	2.93924	2.37553	1.89682	1.99784	5.60333	5.38424	5.26082	6.91229	7.86645
ENSOART00000002009.1	22.1252	26.6099	19.9172	27.19	29.1414	28.6904	41.6771	49.3618	43.9468	31.6919	26.5122	24.4615	23.2868	21.0025	20.3613	28.0054	31.3492	36.0284	25.6262	28.8603
ENSOART00000002011.1	17.857	6.48864	4.01506	3.97923	2.7249	55.6538	43.523	77.0699	52.4668	60.2374	6.96152	13.273	10.7695	11.2951	11.6037	32.9241	40.851	45.5403	66.0385	54.0245
ENSOART00000002016.1	9.93417	12.6899	7.53899	9.28659	9.9738	10.2156	12.2329	11.5163	11.5837	11.5845	9.96597	9.84326	8.71511	8.74929	9.22003	11.9824	14.2419	16.0913	14.5374	18.0986
ENSOART00000002029.1	10.4191	12.9014	5.66602	10.074	11.443	9.72743	10.2385	9.09221	10.1491	8.58376	8.40949	8.6375	7.32252	7.51617	10.6415	4.8627	6.16432	9.17913	4.21208	8.35683
ENSOART00000002034.1	2.11562	1.6533	2.71165	1.3425	1.73415	3.38472	5.36897	2.5428	1.76239	2.01616	6.48962	8.94641	8.30459	6.14506	4.99045	6.20945	6.03438	7.22105	5.47709	5.08496
ENSOART00000002023.1	1.59352	1.6695	1.56292	1.30436	1.5986	9.57659	13.8132	12.2068	16.8675	10.2858	10.3195	14.7224	9.74889	6.28614	13.8964	30.1155	13.247	22.1855	15.1185	11.8623
ENSOART00000002014.1	5.82684	4.90406	2.88079	4.00631	3.76884	8.60544	11.2378	7.95805	8.48327	9.15908	1.7793	0.876149	1.46508	0.89558	1.16236	2.96787	5.68784	2.53318	6.10559	9.10498
ENSOART00000002013.1	13.4009	15.0138	13.388	14.5681	14.0195	15.9293	18.5622	16.3098	15.8632	13.7306	12.0856	11.6506	11.7484	9.38593	9.39563	13.0307	16.5563	13.1161	16.9818	17.3998
ENSOART00000002020.1	0.321182	0.181862	0.356701	0.269373	0.202454	0.261011	0.315279	0.275546	0.332706	0.185802	15.36	23.349	13.1871	31.4152	20.6515	79.1127	90.7396	44.9707	80.1608	72.1107
ENSOART00000002015.1	0	0.0426706	0	0.0213253	0.0353544	0.0429999	0.0722564	0.135403	0.0636603	0.0226275	0.0347626	0.0561688	0	0.0403828	0.0389843	0.0495944	0.0798509	0.0382034	0.0700279	0.0904537
ENSOART00000002017.1	2.64818	2.22259	1.85737	2.19548	2.55758	3.41429	4.19127	3.90915	3.0658	2.27423	3.13947	3.32794	2.71337	2.81589	3.04279	3.96887	5.67207	5.30353	5.46135	7.96674
ENSOART00000002018.1	58.8697	48.0662	26.2155	35.9396	37.7119	36.4031	59.3543	58.9493	66.6714	63.1573	7.34515	7.81288	8.63142	9.90066	8.38604	13.0071	8.87386	15.3575	12.7956	7.1686
ENSOART00000002022.1	7.29827	8.8758	7.38168	9.14455	8.47986	8.6172	9.21102	7.80416	9.77289	9.50637	9.44816	8.14473	7.81236	7.16471	5.54895	11.1866	10.7868	13.6908	10.2104	11.3533
ENSOART00000002031.1	48.9934	42.6477	27.3256	34.3467	32.1605	43.2845	38.2131	43.2349	40.3601	41.0417	18.3404	14.5071	16.1615	17.0627	16.5905	12.9604	19.924	20.22	19.2764	29.6186
ENSOART00000002019.1	0.0700473	0.137292	0.0739266	0.0737148	0.0792777	6.66099	7.75307	6.13073	6.03467	4.17311	1.11049	1.08479	1.02418	1.15935	1.99034	1.09392	2.25618	3.30884	1.93947	2.99527
ENSOART00000002030.1	3.15624	4.27832	4.87577	4.1367	5.05006	6.17912	9.37319	8.81164	8.10704	4.92057	2.75014	3.04967	2.62012	1.96291	5.04847	2.20245	3.26894	4.48316	3.62079	3.81065
ENSOART00000002033.1	71.141	66.7991	47.9438	52.6265	53.3698	87.5127	81.8222	84.0858	83.5752	81.8346	41.6154	36.3453	32.8189	35.987	35.5522	60.3114	57.1335	68.1499	51.0396	60.4723
ENSOART00000002021.1	0	0	0	0	0	0	0	0	0	0	0.0629707	0.217756	0.094482	0.160821	0	0.41966	0.704553	0.62527	0.449472	0.746984
ENSOART00000002024.1	0.0283875	0.055626	0	0	0.0960922	0	0	0	0	0.0592491	0.0236379	0.0196605	0.0191584	0.0521949	0	0.102233	0.190124	0.106552	0.267391	0.302541
ENSOART00000002025.1	0.791051	0.92267	0.839013	0.790808	0.756946	0.584678	0.617674	0.700914	0.751949	0.514711	0.342755	0.530872	0.331282	0.163088	0.276931	0.114847	0.55231	0.26886	0.186882	0.528002
ENSOART00000002026.1	0	0	0	0	0	0	0	0	0	0	0	0	0	0	0	0	0.0296711	0	0	0
ENSOART00000002028.1	0.46195	0.226276	0.727796	0.520002	1.03041	1.09171	0.715748	0.80062	1.3049	0.997295	0.438837	0.29675	0.311823	0.454991	0.864567	0.554188	0.231554	0.650216	0.480368	0.91177
ENSOART00000002027.1	0	0	0	0	0	0	0	0	0	0	0.110608	0.138864	0.0913102	0.309757	0.26313	0.967156	1.46578	1.26625	1.32931	0.984009
ENSOART00000002032.1	0	0	0	0	0	0	0	0	0	0	0	0	0	0	0	0	0	0	0.0126882	0
ENSOART00000002035.1	0	0	0	0	0	0	0	0	0	0	0	0	0.0241314	0	0	0	0.034206	0	0.0918373	0
ENSOART00000002036.1	36.4084	28.2341	18.3159	19.4795	21.2922	33.1485	30.1515	29.1636	29.3687	34.293	10.746	8.85249	7.25107	10.835	9.1674	19.3553	21.9924	14.4001	23.1695	22.8191
ENSOART00000002037.1	0	0	0	0	0	14.7345	20.0321	11.0072	13.3738	8.06214	0.234883	0.555018	0.0319865	0.261004	0.644937	13.7181	13.2958	66.2301	10.0528	23.8468
ENSOART00000002045.1	0.391959	0.225327	0	0.233119	0.201622	0.860832	0.819546	0.700621	0.511487	0.309438	0.471496	0.744331	0.320017	0.28434	0.499906	0.155629	0.460712	0.538057	0.314842	0.185882
ENSOART00000002048.1	18.2441	16.6912	12.7332	15.3297	15.5262	22.7858	22.5824	25.8823	25.1397	19.0348	11.4058	11.0834	11.1962	12.4783	13.1295	20.5635	25.4007	29.5576	26.9146	32.6609
ENSOART00000002038.1	0	0	0	0	0	0	0	0	0	0	0.207465	0.171776	0.166151	0	0.316727	0	0.139983	0	0.0703205	0.236261
ENSOART00000002041.1	0	0	0	0	0	0	0.0124718	0	0.0146192	0	0.00843665	0.166633	0.0754351	0.144908	0.126463	0.206724	0	0.188218	0.0891283	0
ENSOART00000002040.1	0.790554	1.07531	1.0467	0.978483	0.942281	0.443343	0.926203	0.746967	0.690765	0.666775	1.52451	1.72661	1.43792	1.36434	1.65657	4.09131	12.0408	2.23638	7.79159	9.02024
ENSOART00000002044.1	23.0238	20.0575	12.3535	16.9771	18.6846	19.7793	24.6381	21.6788	24.6789	22.7928	7.75826	7.471	7.71273	7.88966	8.08593	8.64511	11.4013	13.2587	11.9541	15.0603
ENSOART00000002050.1	9.43282	9.4905	7.34321	9.64417	8.87044	10.1062	9.72615	9.20088	10.433	7.25183	5.2013	4.83689	4.58171	4.24204	4.94216	4.2452	5.18033	6.92287	5.29986	7.49535
ENSOART00000002039.1	0	0.118046	0	0	0	0	0.10397	0	0.357411	0	0.390089	0.505991	0.0824529	0.359411	0.671441	0.724548	1.74695	1.73177	0.525724	0.495413
[truncated: 21,115 more rows]
